# Supplementary material
Source: PubMed Central journal article supplement (PMC4266379)

# SUPPORTING INFORMATION

## **Chemoenzymatic Synthesis of Spinosyn A**

Hak Joong Kim,<sup>‡</sup> Sei-hyun Choi,<sup>†</sup> Byung-sun Jeon,<sup>†</sup> Namho Kim,<sup>†</sup> Rongson Pongdee,<sup>†</sup> Qingquan Wu,<sup>†</sup> and Hung-wen Liu<sup>†\*</sup>

<sup>†</sup> Division of Medicinal Chemistry, College of Pharmacy, and Department of Chemistry, The University of Texas at Austin, Austin, Texas 78712, USA

<sup>‡</sup> Department of Chemistry, Korea University, Seoul 136-701, Republic of Korea

|                                                                                                         |            |
|---------------------------------------------------------------------------------------------------------|------------|
| <b>I. General Experimental Procedures</b> .....                                                         | <b>S1</b>  |
| <b>II. Enzyme Preparation</b> .....                                                                     | <b>S1</b>  |
| <b>III. Chemical Synthesis of the Presumed Post-PKS Precursor (11)</b> .....                            | <b>S2</b>  |
| <b>IV. Evaluation of the Effect of SpnF on the Transformation From Compound 12 to Compound 16</b> ..... | <b>S20</b> |
| <b>V. Chemoenzymatic Reconstitution of the Post-PKS Modifications to Produce Spinosyn A (1)</b> .....   | <b>S21</b> |
| <b>VI. References</b> .....                                                                             | <b>S23</b> |
| <b>VII. Spectral Data</b> .....                                                                         | <b>S25</b> |

### **I. General Experimental Procedures**

Analytical thin layer chromatography (TLC) was carried out on pre-coated TLC glass plates (Silica gel, grade 60, F<sub>254</sub>, 0.25 mm layer thickness, EMD Chemicals). Flash column chromatography was performed on silica gel (230-400 mesh, grade 60, Sorbent Technologies). High-performance liquid chromatography (HPLC) applications were performed on a Beckman Coulter HPLC instrument equipped with a UV detector. The NMR spectra were acquired on a Varian Unity 500 or 300 spectrometer housed in the NMR Facility of the Department of Chemistry, University of Texas at Austin. The mass spectroscopic analysis was done at the Mass Spectrometry and Proteomics Facility in the Department of Chemistry and the Institute for Cellular and Molecular Biology, University of Texas at Austin. All chemicals were purchased from Sigma-Aldrich, Fisher Scientific or Acros Chemicals, and were used without further purification unless specified.

### **II. Enzyme Preparation**

All enzymes used in this study including SpnJ,<sup>1</sup> SpnM,<sup>2</sup> SpnF,<sup>2</sup> SpnL,<sup>2</sup> SpnG,<sup>3</sup> SpnH,<sup>4</sup> SpnI,<sup>4</sup> and SpnK,<sup>4</sup> were prepared following previously reported procedures.

### III. Chemical Synthesis of the Presumed Post-PKS Precursor (11)

#### III.1. Synthesis of Fragment A (19)

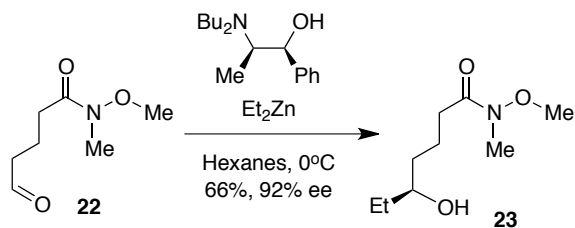

**(S)-5-Hydroxy-N-methoxy-N-methylheptanamide (23)**. To a mixture of aldehyde **22**<sup>5</sup> (2.61 g, 16.4 mmol) in 50 mL anhydrous hexanes at room temperature was added (-)-(1S,2R)-N,N-dibutylnorephedrine (DBNP, 0.273 mL, 0.984 mmol) and the reaction was stirred at room temperature for 30 min. Then, the reaction was cooled to 0 °C and diethyl zinc (1.1 M in toluene, 37 mL, 41 mmol) was added. After stirring for 24 hr, the reaction was quenched by the addition of a saturated ammonium chloride solution (30 mL). The mixture was extracted with dichloromethane (30 mL × 5), dried over anhydrous sodium sulfate, and concentrated under reduced pressure. The crude residue was subjected to flash column chromatography (hexanes/ethyl acetate = 1/3) to afford alcohol **23** (2.05 g, 10.8 mmol, 66%). <sup>1</sup>H NMR (CDCl<sub>3</sub>, 500 MHz) δ 3.65 (s, 3H, OMe), 3.48 (ddd, *J* = 12, 7.9, 4.5 Hz, 1H, 5-H), 3.15 (s, 3H, NMe), 2.43 (*br t*, *J* = 5.5 Hz, 2H, 2-H), 1.77-1.67 (m, 2H, 3-H), 1.53-1.37 (m, 4H, 4-H, 6-H), 0.91 (t, *J* = 7.5 Hz, 3H, 7-H); <sup>13</sup>C NMR (CDCl<sub>3</sub>, 125 MHz) δ 174.7, 72.6, 61.2, 36.5, 32.2, 31.6, 30.1, 20.3, 9.90; HRMS (CI<sup>+</sup>) *m/z* for C<sub>9</sub>H<sub>10</sub>NO<sub>3</sub> [M+H]<sup>+</sup>, calc. 190.1443, found 190.1447.

To determine the absolute stereochemistry as well as the enantiomeric purity of the product, the Mosher method<sup>6</sup> based on <sup>19</sup>F-NMR analysis of the diastereomeric MTPA ester derivatives of alcohol **23** was applied: **(S)-MTPA-ester of 23**: To a clear solution of alcohol **23** (0.05 g, 0.26 mmol) in 4 mL anhydrous dichloromethane at room temperature was added dry pyridine (0.065 mL, 0.81 mmol) followed by (*R*)-(-)- $\alpha$ -methoxy- $\alpha$ -trifluoromethylphenylacetic acid chloride ((*R*)-(-)-MTPA-Cl, 0.095 mL, 0.49 mmol). After stirring for 2 hr, the reaction mixture was quenched by the addition of water (1 mL). The aqueous layer was extracted with dichloromethane (3 mL × 3), and the combined organic layers were dried over anhydrous magnesium sulfate, and concentrated under reduced pressure. The residue was subjected to flash column chromatography (hexanes/ethyl acetate = 1/1) to afford (*S*)-MTPA-ester (0.086 g, 0.22 mmol). In an entirely analogous fashion, the (*R*)-MTPA-ester was prepared using (*S*)-(+)-MTPA-Cl. **(R)-MTPA-ester of 23**: <sup>1</sup>H NMR (CDCl<sub>3</sub>, 500 MHz) δ 7.54-7.52 (m, 2H, Ph), 7.39-7.36 (m, 3H, Ph), 5.07-5.03 (m, 1H, 5-H), 3.63 (s, 3H, OMe), 3.54-3.53 (m, 3H, OMe from Mosher), 3.14 (s, 3H, NMe), 2.44-2.30 (m, 2H, 2-H), 1.71-1.51 (m, 6H, 3-H, 4-H, 6-H), 0.91 (t, *J* = 7.5 Hz, 3H, 7-H); <sup>19</sup>F NMR (CDCl<sub>3</sub>, 470 MHz) δ -71.72 ppm (integration value = 907.52), -71.76 (integration value = 77.68). **(S)-MTPA-ester of 23**: <sup>1</sup>H NMR (CDCl<sub>3</sub>, 500

MHz)  $\delta$  7.54-7.52 (m, 2H, Ph), 7.39-7.36 (m, 3H, Ph), 5.07-5.02 (m, 1H, 5-H), 3.64 (s, 3H, OMe), 3.54-3.53 (m, 3H, OMe from Mosher), 3.15 (s, 3H, NMe), 2.48-2.34 (m, 2H, 2-H), 1.72-1.57 (m, 6H, 3-H, 4-H, 6-H), 0.79 (t,  $J = 7.5$  Hz, 3H, 7-H);  $^{19}\text{F}$  NMR ( $\text{CDCl}_3$ , 470 MHz)  $\delta$  -71.72 ppm (integration value = 84.77), -71.76 (integration value = 941.45).

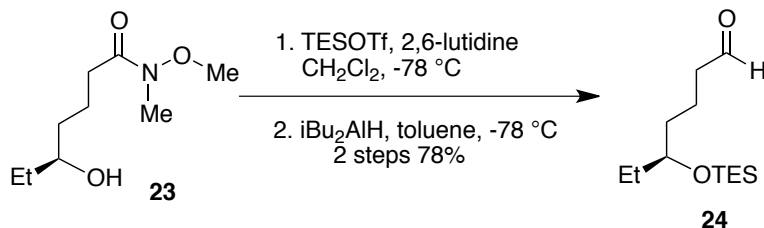

**(S)-5-(Triethylsilyloxy)heptanal (24).** To a clear solution of alcohol **23** (0.238 g, 1.25 mmol) in 5 mL anhydrous dichloromethane at  $-78$   $^\circ\text{C}$  was added 2,6-lutidine (0.290 mL, 2.50 mmol) followed by triethylsilyl trifluoromethanesulfonate (TESOTf, 0.339 mL, 1.50 mmol). After stirred for 3 hr during which the temperature was maintained at  $-78$   $^\circ\text{C}$ , the reaction mixture was poured into a saturated ammonium chloride solution (20 mL). The mixture was extracted with dichloromethane (20 mL  $\times$  3), dried over anhydrous magnesium sulfate, and concentrated under reduced pressure. The residue was subjected to flash column chromatography (hexanes/ethyl acetate = 1/1) to afford a silyl ether (0.310 g, 1.03 mmol). To a solution of the silyl ether in toluene (4 mL) at  $-78$   $^\circ\text{C}$  was added DIBAL-H (1 M in hexanes, 2.06 mL, 2.06 mmol). After 2 hr stirring at  $-78$   $^\circ\text{C}$ , the reaction was quenched by adding methanol (2 mL) followed by a saturated Rochelle's salt solution (3 mL). The resulting mixture was stirred at room temperature for an additional 30 min. The reaction mixture was extracted with ethyl acetate (20 mL  $\times$  3), dried over anhydrous sodium sulfate, and concentrated under reduced pressure. The crude residue was subjected to flash column chromatography (hexanes/ethyl acetate = 19/1) to afford aldehyde **24** (0.237 g, 0.970 mmol, 2 steps 78%).  $^1\text{H}$  NMR ( $\text{CDCl}_3$ , 500 MHz)  $\delta$  9.74 (t,  $J = 1.8$  Hz, 1H, 1-H), 3.59 (quint,  $J = 5.8$  Hz, 1H, 5-H), 2.40 (dt,  $J = 7.4, 1.8$  Hz, 2H, 2-H), 1.73-1.56 (m, 2H, 3-H), 1.48-1.36 (m, 4H, 4-H, 6-H), 0.937 (t,  $J = 7.8$  Hz, 9H, TES), 0.85 (t,  $J = 7.4$  Hz, 3H, 7-H), 0.58 (q,  $J = 7.8$  Hz, 6H, TES);  $^{13}\text{C}$  NMR ( $\text{CDCl}_3$ , 125 MHz)  $\delta$  202.6, 73.1, 44.0, 35.9, 29.8, 18.0, 9.55, 6.92, 5.08; HRMS (CI+)  $m/z$  for  $\text{C}_{13}\text{H}_{29}\text{O}_2\text{Si}$   $[\text{M}+\text{H}]^+$ , calc. 245.1937, found 245.1925.

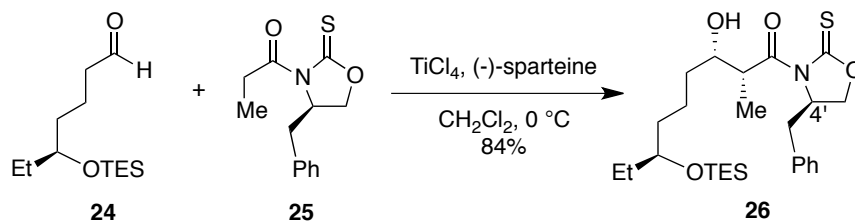

**(2R,3S,7S)-1-((R)-4'-Benzyl-2'-thioxooxazolidin-3'-yl)-3-hydroxy-2-methyl-7-(triethylsilyloxy)nonan-1-one (26).** To a clear solution of oxazolidino-2-thione **25** (0.528 g, 2.12 mmol) in 14 mL anhydrous dichloromethane at 0 °C was added titanium(IV) chloride (0.243 mL, 2.22 mmol) resulting in a yellow suspension. After 5 min of stirring, (-)-sparteine (1.20 mL, 5.30 mmol) was added to the suspension to produce a dark red solution. The reaction continued at 0 °C for 20 min for complete enolization, and then a precooled solution of aldehyde **24** (0.780 g, 3.19 mmol) in 3 mL anhydrous dichloromethane was slowly transferred to the reaction mixture at 0 °C *via* cannula, turning the reaction to a lighter shade of red. After 1 hr, the mixture was poured into a brine solution (100 mL), extracted with dichloromethane (25 mL × 5), dried over anhydrous sodium sulfate, and concentrated under reduced pressure. The crude residue was subjected to flash column chromatography (hexanes/ethyl acetate = 4/1) to afford *syn*-aldol adduct **26** (0.848 g, 1.72 mmol) in 84% yield. <sup>1</sup>H NMR (CDCl<sub>3</sub>, 500 MHz) δ 7.33-7.29 (m, 2H, Ph), 7.28-7.24 (m, 1H, Ph), 7.20-7.18 (m, 2H, Ph), 4.96-4.91 (m, 1H, 4'-H), 4.67 (dq, *J* = 6.9, 2.7 Hz, 1H, 2-H), 4.32-4.26 (m, 2H, 5'-H), 3.98-3.96 (m, 1H, 3-H), 3.57 (quint, *J* = 5.7 Hz, 1H, 7-H), 3.22 (dd, *J* = 13.3, 3.5 Hz, 1H, PhCH<sub>2</sub>), 2.74 (dd, *J* = 13.3, 10 Hz, 1H, PhCH<sub>2</sub>), 1.58-1.28 (m, 8H, 4-H, 5-H, 6-H, 8-H), 1.27 (d, *J* = 6.9 Hz, 3H, 2-Me), 0.937 (t, *J* = 8 Hz, 9H, TES), 0.849 (t, *J* = 7.5 Hz, 3H, 9-H), 0.574 (q, *J* = 8 Hz, 6H, TES); <sup>13</sup>C NMR (CDCl<sub>3</sub>, 125 MHz) δ 185.0, 178.4, 135.1, 129.4, 129.0, 127.5, 73.4, 71.6, 70.2, 59.9, 42.0, 37.6, 36.5, 34.3, 29.8, 21.7, 10.3, 9.62, 6.96, 5.12; HRMS (CI+) *m/z* for C<sub>26</sub>H<sub>44</sub>N<sub>1</sub>O<sub>4</sub>Si<sub>1</sub>S<sub>1</sub> [M+H]<sup>+</sup>, calc. 494.2760, found 494.2784.

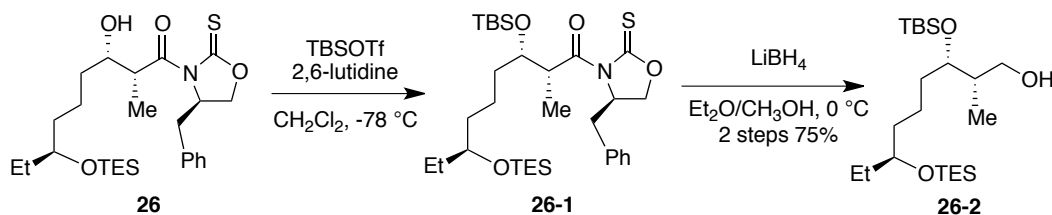

**(2S,3S,7S)-3-(tert-Butyldimethylsilyloxy)-2-methyl-7-(triethylsilyloxy)nonan-1-ol (26-2).** To a clear solution of *syn*-aldol adduct **26** (3.51 g, 7.12 mmol) in 50 mL anhydrous dichloromethane was added 2,6-lutidine (1.70 mL, 14.2 mmol) followed by *tert*-butyldimethylsilyl trifluoromethanesulfonate (TBSOTf, 1.96 mL, 8.54 mmol) at -78 °C and the reaction continued with the temperature maintained at -78 °C for 2 hr. Then, the reaction mixture was poured into a saturated sodium bicarbonate solution (50 mL), extracted with dichloromethane (100 mL × 3), dried over anhydrous magnesium sulfate, and concentrated under reduced pressure. The residue was subjected to flash column chromatography (hexanes/ethyl acetate = 19/1) to afford silyl ether **26-1** (3.99 g, 6.58 mmol, 92%). To a solution of **26-1** in anhydrous diethyl ether (40 mL) and methanol (0.340 mL) at 0 °C was added lithium borohydride (2 M in tetrahydrofuran, 4.23 mL, 8.47 mmol). The immediate evolution of a gas, presumably molecular hydrogen, was noted. After 15 min stirring at 0 °C, the reaction mixture was

warmed to room temperature over 1 hr, at which time 15% sodium hydroxide (40 mL) was added, and the reaction mixture was stirred for additional 30 min. The mixture was then extracted with ethyl acetate (40 mL  $\times$  3), dried over anhydrous magnesium sulfate, and concentrated under reduced pressure. The crude residue was subjected to flash column chromatography (hexanes/ethyl acetate = 19/1) to afford the primary alcohol **26-2** (2.24 g, 5.28 mmol, 81%).  $^1\text{H}$  NMR ( $\text{CDCl}_3$ , 500 MHz)  $\delta$  3.76-3.71 (m, 1H, 3-H or 7-H), 3.68-3.64 (m, 1H, 1-H), 3.59-3.55 (m, 1H, 3-H or 7-H), 3.49 (dd,  $J$  = 10.6, 5.2 Hz, 1H, 1-H), 1.95-1.91 (m, 1H, 2-H), 1.57-1.36 (m, 7H, 4-H, 5-H, 6-H, 8-H), 1.26-1.18 (m, 1H, 5-H), 0.94 (t,  $J$  = 8 Hz, 6H, TES), 0.88 (s, 9H, TBS), 0.85 (t,  $J$  = 7.4 Hz, 3H, 9-H), 0.79 (d,  $J$  = 6.9 Hz, 3H, 2-Me), 0.57 (q,  $J$  = 8 Hz, 6H, TES), 0.07 (s, 3H, TBS), 0.05 (s, 3H, TBS);  $^{13}\text{C}$  NMR ( $\text{CDCl}_3$ , 125 MHz)  $\delta$  75.9, 73.3, 66.1, 39.5, 36.8, 32.6, 29.8, 25.8, 22.0, 18.0, 11.9, 9.66, 6.95, 6.57, 5.79, 5.12, -4.40, -4.49; HRMS (CI+)  $m/z$  for  $\text{C}_{22}\text{H}_{51}\text{O}_3\text{Si}_2$   $[\text{M}+\text{H}]^+$ , calc. 419.3377, found 419.3374.

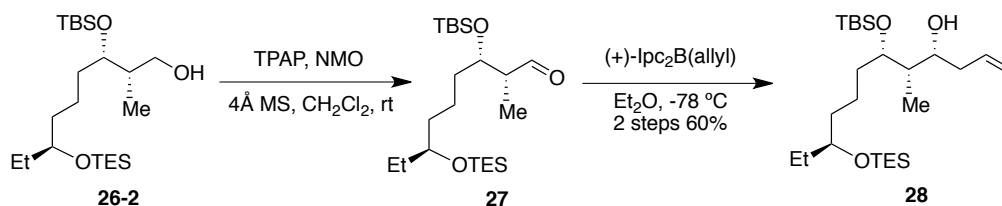

**(4R,5S,6S,10S)-6-(tert-Butyldimethylsilyloxy)-5-methyl-10-(triethylsilyloxy)dodec-1-en-4-ol (28)**. To a solution of primary alcohol **26-2** (0.870 g, 2.05 mmol) in anhydrous dichloromethane (20 mL) at room temperature was added activated 4 Å molecular sieve (MS) and the resulting suspension was stirred at ambient temperature for 10 min to get rid of moisture. To the suspension, *N*-methylmorpholine oxide (NMO) (0.480 g, 4.10 mmol) and tetrapropylammonium perruthenate (TPAP) (0.036 g, 0.103 mmol) were added in sequence. After 30 min stirring at room temperature, 10% sodium thiosulfate ( $\text{Na}_2\text{S}_2\text{O}_3$ ) solution (20 mL) was added to quench the excess oxidants. The reaction mixture was then extracted with dichloromethane (20 mL  $\times$  3), washed with a brine solution (20 mL), dried over anhydrous sodium sulfate, and concentrated under reduced pressure. The crude residue was subjected to flash column chromatography (hexanes/ethyl acetate = 50/1) to afford aldehyde **27** (0.742 mg, 1.76 mmol, 86%). For application of Brown's asymmetric allylation, the reagent of (+)-*B*-allyldiisopinocampheylborane [(+)-Ipc<sub>2</sub>B(allyl)] was prepared as follows. To a solution of (+)-*B*-methoxydiisopinocampheylborane [(+)-Ipc<sub>2</sub>BOMe] (0.164 g, 0.519 mmol) in anhydrous ethyl ether (2 mL) at room temperature was added allylmagnesium bromide (1 M in ethyl ether, 0.472 mL, 0.472 mmol) and the resulting white suspension was stirred for 1 hr. After the mixture was cooled to -78 °C, a solution of aldehyde **27** (0.100 g, 0.236 mmol) in anhydrous ethyl ether (1 mL) was added to the solution containing (+)-Ipc<sub>2</sub>B(allyl) and the mixture was stirred at -78 °C for an additional 30 min. Methanol (1 mL) was added to quench the reaction, followed by the addition of 1 N sodium hydroxide (1 mL) and 30% hydrogen

peroxide solution (0.340 mL, 0.944 mmol). After overnight stirring at room temperature, the reaction mixture was poured into a saturated sodium bicarbonate solution (10 mL), extracted with ethyl acetate (10 mL × 3), dried over anhydrous magnesium sulfate, and concentrated under reduced pressure. The crude residue was subjected to flash column chromatography (hexanes/ethyl acetate = 50/1) to afford homoallylic alcohol **28** (0.070 g, 1.53 mmol, 70%). <sup>1</sup>H NMR (CDCl<sub>3</sub>, 500 MHz) δ 5.83-5.75 (m, 1H, 2-H), 5.11-5.03 (m, 2H, 1-H), 3.82-3.76 (m, 2H, 6-H, 10-H), 3.55 (*app* quint, *J* = 6 Hz, 1H, 4-H), 2.72 (*br s*, 1H, 4-OH), 2.30-2.24 (m, 1H, 3-H), 2.22-2.16 (m, 1H, 3-H), 1.61-1.17 (m, 9H, 5-H, 7-H, 8-H, 9-H, 11-H), 0.94 (t, *J* = 8 Hz, 9H, TES), 0.87 (*app s*, 12H, TBS, 2-Me), 0.85 (t, *J* = 7.4 Hz, 3H, 12-H), 0.57 (q, *J* = 8 Hz, 6H, TES), 0.074 (s, 3H, TBS), 0.069 (s, 3H, TBS); <sup>13</sup>C NMR (CDCl<sub>3</sub>, 125 MHz) δ 135.4, 117.1, 77.5, 74.3, 73.4, 39.8, 39.0, 36.7, 35.0, 29.9, 25.9, 21.3, 18.0, 9.7, 6.9, 5.7, 5.1, -3.6, -4.5; HRMS (CI+) *m/z* for C<sub>25</sub>H<sub>53</sub>O<sub>3</sub>Si<sub>2</sub> [M+H]<sup>+</sup>, calc. 457.3533, found 457.3531. To confirm the relative stereochemistry between C-4 and C-5 (C-15 and C-17 in spinosyn A), compound **28** was derivatized to the corresponding acetonide as follows.<sup>7</sup> (*S*)-6-((4'*S*,5'*R*,6'*R*)-6'-Allyl-2',2',5'-trimethyl-1',3'-dioxan-4'-yl)hexan-3-ol. To a solution of compound **28** (79 mg, 0.17 mmol) in tetrahydrofuran (2 mL) at 0 °C was added tetrabutylammonium fluoride (1 M solution in tetrahydrofuran, 0.378 mL, 0.378 mmol). After 30 min stirring, the reaction mixture was warmed to room temperature and stirred for an additional 1 hr. The mixture was then poured into a saturated ammonium chloride solution (10 mL) and extracted with dichloromethane (10 mL × 3). The combined organic extracts were dried over anhydrous sodium sulfate and concentrated under reduced pressure. The crude product, a triol, was used for the next step without further purification. To a solution of the triol obtained in the previous step (~40 mg, 0.17 mmol) in a mixture of 2,2-dimethoxypropane (1 mL) and dichloromethane (1 mL) were added several crystals of pyridinium *p*-toluenesulfonate (PPTS). The reaction mixture was stirred for 1.5 hr, then poured into a saturated sodium bicarbonate solution (10 mL), and extracted with dichloromethane (10 mL × 3). The combined organic extracts were dried over anhydrous magnesium sulfate and concentrated under reduced pressure. The crude residue was subjected to flash column chromatography (hexanes/ethyl acetate = 4/1) to afford the desired acetonide (33 mg, 0.122, 72% for 2 steps). <sup>1</sup>H NMR (CDCl<sub>3</sub>, 500 MHz) δ 5.78-5.69 (m, 1H, allyl 2''-H), 5.10-5.06 (m, 1H, allyl 1''-H), 5.03-5.00 (m, 1H, allyl 1''-H), 3.88 (td, *J* = 7.1, 2.3 Hz, 1H, 6'-H), 3.84-3.81 (m, 1H, 4'-H), 3.53-3.48 (m, 1H, 3-H), 2.30-2.24 (m, 1H, allyl 3''-H), 2.14-2.08 (m, 1H, allyl 3''-H), 1.53-1.26 (m, 9H, 2-H, 4-H, 5-H, 6-H, 5'-H), 1.39 (s, 3H, 2'-Me), 1.36 (s, 3H, 2'-Me), 0.91 (t, *J* = 7.5 Hz, 3H, 1-H), 0.82 (d, *J* = 6.8 Hz, 3H, 5'-Me); <sup>13</sup>C NMR (CDCl<sub>3</sub>, 125 MHz) δ 134.5, 116.8, 98.8, 73.3, 73.1, 73.0, 37.2, 36.7, 34.1, 32.7, 30.1, 30.0 (2'-Me), 21.5, 19.6 (2'-Me), 9.8, 4.5.

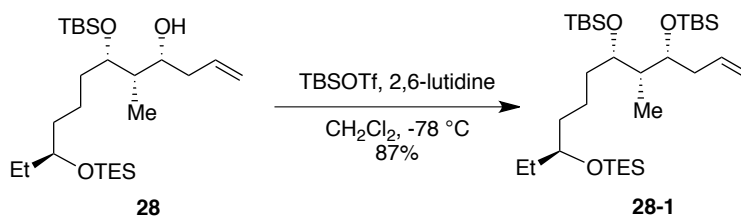

**(4*R*,5*S*,6*S*,10*S*)-4,6-Bis(*tert*-Butyldimethylsilyloxy)-5-methyl-10-(triethylsilyloxy)dodec-1-ene (28-1).** To a solution of alcohol **28** (3.78 g, 8.24 mmol) in anhydrous dichloromethane (50 mL) at -78 °C was added 2,6-lutidine (2.87 mL, 24.7 mmol) followed by *tert*-butyldimethylsilyl trifluoromethanesulfonate (TBSOTf, 2.82 mL, 12.3 mmol). After 2 hr of stirring at -78 °C, the reaction mixture was warmed to room temperature over 2 hr and then quenched by the addition of a saturated sodium bicarbonate solution (50 mL). The reaction mixture was extracted with dichloromethane (50 mL  $\times$  3), dried over anhydrous magnesium sulfate, and concentrated under reduced pressure. The crude residue was subjected to flash column chromatography (hexanes/ethyl acetate = 50/1) to afford silyl ether **28-1** (4.11 g, 7.17 mmol, 87%). <sup>1</sup>H NMR (CDCl<sub>3</sub>, 500 MHz)  $\delta$  5.81-5.73 (m, 1H, 2-H), 5.03-4.99 (m, 2H, 1-H), 3.75 (q,  $J$  = 5.6 Hz, 1H, 6-H or 10-H), 3.67 (q,  $J$  = 5.6 Hz, 1H, 6-H or 10-H), 3.54 (quint,  $J$  = 5.8 Hz, 1H, 4-H), 2.28-2.26 (m, 2H, 3-H), 1.62-1.18 (m, 9H, 5-H, 7-H, 8-H, 9-H, 11-H), 0.94 (t, 9H,  $J$  = 8 Hz, TES), 0.87 (d,  $J$  = 4 Hz, 18H, TBS), 0.85 (t,  $J$  = 7.4 Hz, 3H, 12-H), 0.84 (d,  $J$  = 7.5 Hz, 3H, 5-Me), 0.57 (q,  $J$  = 8 Hz, 6H, TES), 0.01-0.03 (m, 12H, TBS); <sup>13</sup>C NMR (CDCl<sub>3</sub>, 125 MHz)  $\delta$  135.0, 116.7, 73.5, 72.7, 72.2, 40.5, 39.7, 37.2, 35.1, 29.8, 26.0, 20.7, 18.2, 9.6, 9.3, 6.9, 5.1, -3.9, -4.47, -4.52; HRMS (CI+)  $m/z$  for C<sub>31</sub>H<sub>69</sub>O<sub>3</sub>Si<sub>3</sub> [M+H]<sup>+</sup>, calc. 573.4555, found 573.4557.

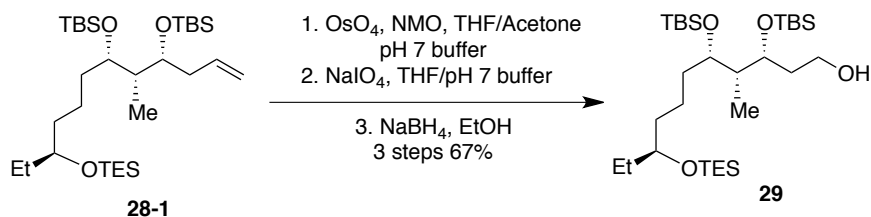

**(3*R*,4*R*,5*S*,9*S*)-3,5-Bis(*tert*-butyldimethylsilyloxy)-4-methyl-9-(triethylsilyloxy)undecan-1-ol (29).** To a solution of olefin **28-1** (4.11 g, 7.17 mmol) in tetrahydrofuran (13 mL), acetone (13 mL), and pH 7 buffer (13 mL, potassium phosphate, Fisher Scientific, cat # SB109) at room temperature was added *N*-methylmorpholine oxide (NMO, 1.25 g, 10.7 mmol) followed by osmium tetroxide (0.090 g, 0.358 mmol). After stirred overnight, the reaction mixture was poured into 10% sodium thiosulfate (Na<sub>2</sub>S<sub>2</sub>O<sub>3</sub>) solution (50 mL) and stirred for an additional 1 hr to reduce residual oxidants. Then, the mixture was extracted with ethyl acetate (50 mL  $\times$  5), washed with a brine solution (50 mL), dried over anhydrous sodium sulfate, concentrated under reduced pressure, and used without further purification. To a clear solution of the crude diol (4.6

g) in tetrahydrofuran (120 mL) and pH 7 buffer (40 mL, potassium phosphate, Fisher Scientific, cat # SB109) at room temperature was added sodium periodate (4.8 g, 22.7 mmol) in three portions at 10 min intervals. After 3 hr stirring, the reaction mixture was poured into a saturated sodium bicarbonate solution (50 mL), extracted with ethyl acetate (50 mL  $\times$  3), dried over anhydrous sodium sulfate, concentrated under reduced pressure, and the resulting crude product was used without further purification. To a solution of the crude aldehyde (4.35 g) in ethyl alcohol (70 mL) at room temperature was added sodium borohydride (0.427 g, 11.3 mmol). After 1 hr stirring, the reaction mixture was poured into a saturated ammonium chloride solution (50 mL), extracted with ethyl acetate (50 mL  $\times$  3), washed with a brine solution (50 mL), dried over anhydrous magnesium sulfate, and concentrated under reduced pressure. The crude residue was subjected to flash column chromatography (hexanes/ethyl acetate = 19/1) to afford alcohol **29** (2.77 g, 4.80 mmol, 3 steps 67%).  $^1\text{H}$  NMR ( $\text{CDCl}_3$ , 500 MHz)  $\delta$  3.88-3.85 (m, 1H, 5-H or 9-H), 3.83-3.78 (m, 1H, 5-H or 9-H), 3.69-3.64 (m, 2H, 1-H), 3.55 (quint,  $J$  = 5.8 Hz, 1H, 3-H), 1.89-1.19 (m, 11H, 2-H, 4-H, 6-H, 7-H, 8-H, 10-H), 0.94 (t,  $J$  = 8 Hz, 9H, TES), 0.88 (s, 9H, TBS), 0.86 (s, 9H, TBS), 0.89-0.85 (*app* m, 6H, 4-Me, 11-H), 0.58 (q,  $J$  = 8 Hz, 6H, TES), 0.08-0.01 (m, 12H, TBS);  $^{13}\text{C}$  NMR ( $\text{CDCl}_3$ , 125 MHz)  $\delta$  73.4, 72.8, 72.4, 59.8, 40.4, 37.0, 35.6, 35.5, 29.8, 25.9, 25.8, 21.1, 18.1, 18.0, 9.8, 9.6, 6.9, 5.2, -3.7, -4.1, -4.5; HRMS ( $\text{CI}^+$ )  $m/z$  for  $\text{C}_{30}\text{H}_{69}\text{O}_4\text{Si}_3$  [ $\text{M}+\text{H}$ ] $^+$ , calc. 577.4504, found 577.4483.

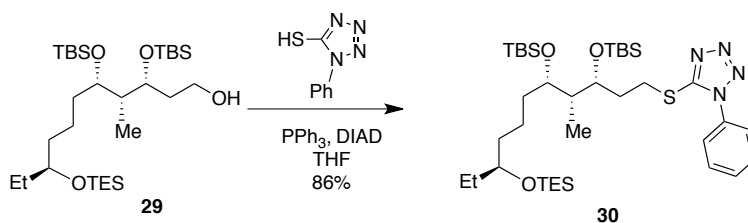

**5-((3R,4R,5S,9S)-3,5-Bis(*tert*-butyldimethylsilyloxy)-4-methyl-9-(triethylsilyloxy)undecylthio)-1-phenyl-1H-**

**tetrazole (30).** To a solution of alcohol **29** (0.184 g, 0.318 mmol) in anhydrous tetrahydrofuran (6 mL) at 0 °C was added 1-phenyl-1H-tetrazole-5-thiol (0.085 g, 0.477 mmol) followed by triphenylphosphine ( $\text{PPh}_3$ , 0.125 g, 0.477 mmol) and diisopropyl azodicarboxylate (DIAD, 0.094 mL, 0.477 mmol), and the resulting yellow suspension was stirred at 0 °C for 1 hr. The reaction mixture was warmed to room temperature over 1 hr, concentrated under reduced pressure, and directly subjected to flash column chromatography (hexanes/ethyl acetate = 50/1) to afford thioether **30** (0.202 g, 0.274 mmol, 86%).  $^1\text{H}$  NMR ( $\text{CDCl}_3$ , 500 MHz)  $\delta$  7.54-7.49 (m, 5H, Ph), 3.84-3.78 (m, 2H, 9-H, 3-H), 3.56 (*app* quint,  $J$  = 5.8 Hz, 1H, 5-H), 3.41-3.30 (m, 2H, 1-H), 2.18-2.11 (m, 1H, 2-H), 2.00-1.93 (m, 1H, 2-H), 1.73-1.20 (m, 9H, 4-H, 6-H, 7-H, 8-H, 10-H), 0.92 (t,  $J$  = 8 Hz, 9H, TES), 0.88-0.83 (*app* m, 6 H, 4-Me, 11-H), 0.87 (s, 9H, TBS), 0.85 (s, 9H, TBS), 0.56 (q,  $J$  = 8 Hz, 6H, TES), 0.04-0.002 (m, 12H, TBS);  $^{13}\text{C}$  NMR ( $\text{CDCl}_3$ , 125 MHz)  $\delta$  154.3, 133.8, 130.0, 129.7, 123.8, 73.4, 72.5, 72.1, 40.8,



37.0, 35.5, 33.9, 29.7, 29.0, 26.0, 25.9, 21.1, 18.1, 18.0, 9.77, 9.62, 6.95, 6.56, 5.80, 5.12, -3.7, -4.1, -4.37, -4.40, -4.44;  
 HRMS (CI+)  $m/z$  for  $C_{37}H_{73}N_4O_3Si_3S_1$   $[M+H]^+$ , calc. 737.4711, found 737.4689.

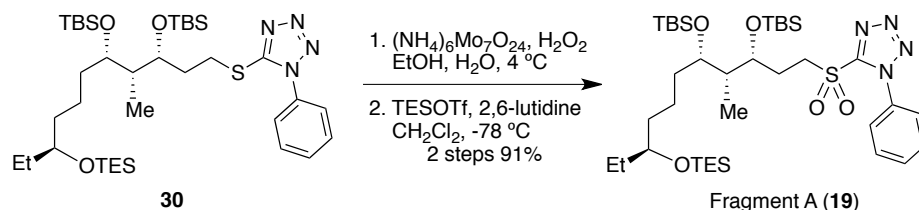

**(3*S*,7*S*,8*R*,9*R*)-7,9-Bis(*tert*-butyldimethylsilyloxy)-8-methyl-11-(1-phenyl-1*H*-tetrazol-5-ylsulfonyl)undecan-3-ol (19, fragment A).** To a solution of thioether **30** (2.43 g, 3.30 mmol) in ethyl alcohol (10 mL) at 0 °C was added a premixed oxidant (2 mL, ammonium molybdate/30%  $H_2O_2$  = 2.4 g/10 mL), and the reaction was stirred at 0 °C for 18 hr. Then, the reaction mixture was poured into water (30 mL), extracted with ethyl acetate (30 mL  $\times$  3), washed with a brine solution (30 mL), dried over anhydrous magnesium sulfate, and concentrated under reduced pressure. The crude residue was subjected to flash column chromatography (hexanes/ethyl acetate = 19/1) to afford a sulfone with its triethylsilyl protecting group cleaved (2.04 g, 3.11 mmol, 95%). To a solution of the resulting alcohol (0.056 g, 0.0853 mmol) in dichloromethane (3 mL) at -78 °C was added 2,6-lutidine (0.015 mL, 0.128 mmol) followed by the addition of triethylsilyl trifluoromethanesulfonate (TESOTf, 0.023 mL, 0.128 mmol). After 1 hr stirring at -78 °C, the reaction was quenched by the addition of a saturated ammonium chloride solution (1 mL). The mixture was extracted with dichloromethane (5 mL  $\times$  3), dried over anhydrous magnesium sulfate, and concentrated under reduced pressure. The crude residue was subjected to flash column chromatography (hexane/ethyl acetate = 49/1) to afford fragment A (**19**) (62.7 mg, 0.0815 mmol, 96%).  $^1H$  NMR ( $CDCl_3$ , 500 MHz)  $\delta$  7.70-7.67 (m, 2H, Ph), 7.60-7.56 (m, 3H, Ph), 3.88-3.85 (m, 1H, 3-H), 3.82-3.79 (m, 1H, 9-H), 3.77-3.73 (m, 2H, 1-H), 3.57 (*app* quint,  $J$  = 5.8 Hz, 1H, 5-H), 2.31-2.24 (m, 1H, 2-H), 2.17-2.10 (m, 1H, 2-H), 1.61-1.17 (m, 9H, 4-H, 6-H, 7-H, 8-H, 10-H), 0.93 (t,  $J$  = 8 Hz, 9H, TES), 0.91-0.83 (*app* m, 6H, 11-H, 4-Me), 0.89 (s, 9H, TBS), 0.83 (s, 9H, TBS), 0.57 (q,  $J$  = 8 Hz, 6H, TES), 0.07-0.001 (m, 12H, TBS);  $^{13}C$  NMR ( $CDCl_3$ , 125 MHz)  $\delta$  153.5, 133.1, 131.4, 129.7, 125.0, 73.3, 71.7, 71.6, 52.2, 40.7, 36.8, 35.6, 29.8, 26.4, 25.9, 25.9, 21.2, 18.1, 18.05, 9.62, 6.94, 5.12, -3.6, -4.3, -4.48, -4.51; HRMS (CI+)  $m/z$  for  $C_{37}H_{73}N_4O_5Si_3S_1$   $[M+H]^+$ , calc. 769.4610, found 769.4613.

### III.2. Synthesis of Fragment B (20)

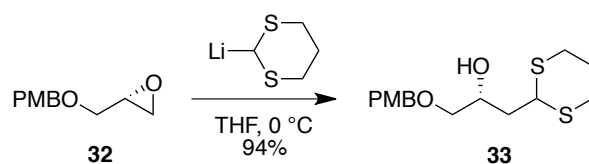

**(R)-1-(1',3'-Dithian-2-yl)-3-(4''-methoxybenzyloxy)propan-2-ol (33).** To a solution of 1,3-dithiane (1.44 g, 11.9 mmol) in tetrahydrofuran (10 mL) at -30 °C was added *n*-butyl lithium (2.5 M solution in hexanes, 4.95 mL, 12.4 mmol), and the mixture was stirred for 2 hr while the temperature was maintained lower than -10 °C. To this solution, after warmed to 0 °C, was added epoxide **32** (1.66 g, 8.53 mmol). After 2 h of stirring, the reaction was quenched by adding a half-saturated ammonium chloride solution (20 mL) at room temperature, and the resulting mixture was extracted with ethyl acetate (30 mL × 3). The combined organic extracts were washed with a brine solution (50 mL), dried over anhydrous magnesium sulfate, and concentrated under reduced pressure. The crude residue was subjected to flash column chromatography (hexanes/ethyl acetate = 5/2) to afford the secondary alcohol **33** (2.51 g, 7.98 mmol, 94%). <sup>1</sup>H NMR (CDCl<sub>3</sub>, 400 MHz) δ 7.27-7.23 (m, 2H, PMB), 6.90-6.86 (m, 2H, PMB), 4.48 (d, *J* = 1.7 Hz, 2H, PMB), 4.25 (dd, *J* = 9.6, 4.9 Hz, 1H, 2-H), 4.13-4.09 (m, 1H, 2'-H), 3.80 (s, 3H, PMB), 3.48 (dd, *J* = 9.6, 3.4 Hz, 1H, 3-H), 3.34 (dd, *J* = 9.6, 6.9 Hz, 1H, 3-H), 2.94-2.79 (m, 4H, 3'-H, 5'-H), 2.50 (d, *J* = 4.1 Hz, 1H, OH), 2.14-1.78 (m, 4H, 1-H, 4'-H); <sup>13</sup>C NMR (CDCl<sub>3</sub>, 100 MHz) δ 159.3, 129.8, 129.3, 113.8, 73.6, 73.0, 67.1, 55.2, 43.7, 38.9, 30.3, 30.0, 25.9; HRMS (CI+) *m/z* for C<sub>15</sub>H<sub>22</sub>NaO<sub>3</sub>S<sub>2</sub> [M+Na]<sup>+</sup>, calc. 337.0904, found 337.0903.

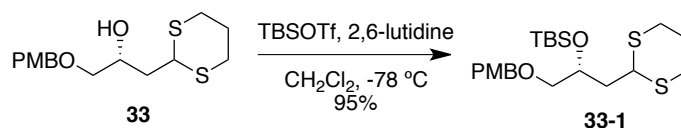

**(R)-1-(1',3'-Dithian-2'-yl)-3-(4''-methoxybenzyloxy)propan-2-yloxy(tert-butyl)dimethylsilane (33-1).** To a solution of the secondary alcohol **33** (75.4 mg, 0.239 mmol) and 2,6-lutidine (39 μL, 0.334 mmol) at -78 °C was added *tert*-butyldimethylsilyl trifluoromethanesulfonate (TBSOTf, 66 μL, 0.287 mmol). After 5 hr of stirring, the mixture was poured into a 1 N hydrochloric acid solution and extracted with dichloromethane (5 mL × 3). The combined organic extracts were washed with a brine solution (20 mL), dried over anhydrous magnesium sulfate, and concentrated under reduced pressure. The crude residue was subjected to flash column chromatography (hexanes/ethyl acetate = 19/1) to afford silyl ether **33-1** (96.9 mg, 0.226 mmol, 95%). <sup>1</sup>H NMR (CDCl<sub>3</sub>, 400 MHz) δ 7.30-7.26 (m, 2H, PMB), 6.92-6.88 (m, 2H, PMB), 4.47 (s, 2H, PMB), 4.17-4.09 (m, 2H, 2-H, 2'-H), 3.83 (s, 3H, PMB), 3.34-3.31 (m, 2H, 3-H), 2.89-2.75 (m, 4H, 4''-H, 6''-H), 2.15-1.62 (m, 4H, 1-H, 5''-H), 0.91 (s, 9H, TBS), 0.13 (s, 3H, TBS), 0.09 (s, 3H, TBS); <sup>13</sup>C NMR (CDCl<sub>3</sub>, 100 MHz) δ 159.1, 130.32, 129.2, 113.7, 74.3, 72.9, 67.9, 55.3, 43.6, 40.3, 30.5, 29.9, 26.0, 25.9, 18.1, -4.4, -4.8; HRMS (CI+) *m/z* for C<sub>21</sub>H<sub>37</sub>O<sub>3</sub>S<sub>2</sub>Si [M+H]<sup>+</sup>, calc. 429.1955, found 429.1948.

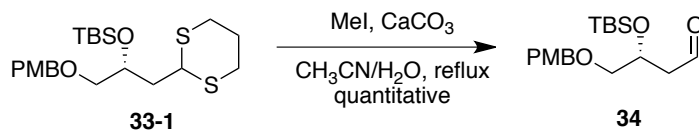

**(R)-3-(tert-Butyldimethylsilyloxy)-4-(4'-methoxybenzyloxy)butanal (34)**. To a solution of dithiane **33-1** (41.4 mg, 96.5  $\mu\text{mol}$ ) in a mixture of acetonitrile (4 mL) and water (1 mL) at room temperature was added iodomethane (0.1 mL, excess) and calcium carbonate (35 mg, excess), and the reaction mixture was heated under reflux for 6 hr. Then, the mixture was diluted with water (10 mL) and extracted with ethyl acetate (5 mL  $\times$  3). The combined organic extracts were washed with a brine solution (10 mL), dried over anhydrous magnesium sulfate, and concentrated under reduced pressure. The crude residue was subjected to flash column chromatography (hexanes/ethyl acetate = 9/1) to afford aldehyde **34** (30 mg, 97  $\mu\text{mol}$ , quantitative).  $^1\text{H}$  NMR ( $\text{CDCl}_3$ , 400 MHz)  $\delta$  9.72 (t,  $J = 2.7$  Hz, 1H, 1-H), 7.20-7.16 (m, 2H, PMB), 6.83-6.81 (m, 2H, PMB), 4.39 (s, 2H, PMB), 4.28 (tt,  $J = 6.5, 5.1$  Hz, 1H, 3-H), 3.75 (s, 3H, PMB), 3.41 (dd,  $J = 9.6, 5.1$  Hz, 1H, 4-H), 3.30 (dd,  $J = 9.6, 6.5$  Hz, 1H, 4-H), 2.58 (ddd,  $J = 15.9, 5.1, 2.0$  Hz, 1H, 2-H), 2.50 (ddd,  $J = 15.9, 6.7, 2.7$  Hz, 1H, 2-H), 0.8 (s, 9H, TBS), 0.0 (s, 6H, TBS);  $^{13}\text{C}$  NMR ( $\text{CDCl}_3$ , 100 MHz)  $\delta$  201.5, 159.2, 123.0, 129.3, 113.8, 73.7, 73.0, 67.3, 55.3, 49.0, 25.7, 18.0, -4.5, -5.0; HRMS (ESI+)  $m/z$  for  $\text{C}_{18}\text{H}_{30}\text{O}_4\text{S}_1$   $[\text{M}+\text{Na}]^+$ , calc. 361.1806, found 361.1794.

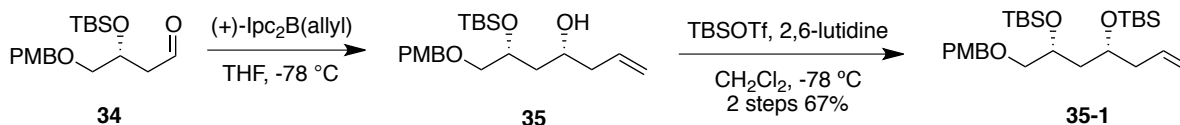

**(2R,4R)-1-(4-Methoxybenzyloxy)-2,4-bis(tert-butyldimethylsilyloxy)hept-6-ene (35-1)**. To a stirred solution of (+)- $\text{Ipc}_2\text{BCl}$  (1.74 g, 5.43 mmol) in anhydrous tetrahydrofuran (20 mL) was added 1.0 M allyl magnesium bromide (5.43 mL, 5.43 mmol) at  $-78$   $^\circ\text{C}$ . After 30 min, the resulting white suspension was warmed to room temperature and stirred for an additional 4 hr. The solution was then cooled to  $-78$   $^\circ\text{C}$  and treated dropwise with a solution of aldehyde **34** (1.42 g, 4.19 mmol) in anhydrous tetrahydrofuran (5 mL). After stirring at  $-78$   $^\circ\text{C}$  for 2 hr, the reaction was quenched by adding methanol (5 mL) followed by an alkaline hydrogen peroxide solution and stirred at room temperature for an additional 2 hr. The solution was diluted with ethyl ether (50 mL), washed with a brine solution (40 mL), dried over anhydrous magnesium sulfate, and concentrated under reduced pressure. The crude residue was subjected to flash column chromatography (hexanes/ethyl acetate = 19/1) to afford the corresponding homoallylic alcohol **35** (1.39 g, 3.65 mmol, 87%). To a solution of the resulting alcohol **35** (1.39 g, 3.65 mmol) and 2,6-lutidine (0.55 mL, 4.75 mmol) in dichloromethane (25 mL) at  $-78$   $^\circ\text{C}$  was added *tert*-butyldimethylsilyl trifluoromethanesulfonate (1.00 mL, 4.38 mmol). After 1 hr, the reaction mixture was poured into a saturated sodium bicarbonate solution (40 mL) and extracted with dichloromethane (25 mL  $\times$  3). The combined

organic extracts were washed with a brine solution (30 mL), dried over anhydrous magnesium sulfate, and concentrated under reduced pressure. The crude residue was subjected to flash column chromatography (hexane/ethyl acetate = 29/1) to afford compound **35-1** (1.39 g, 2.81 mmol, 77%). <sup>1</sup>H NMR (CDCl<sub>3</sub>, 300 MHz) δ 7.26 (d, *J* = 8.7 Hz, 2H, PMB-aromatic *H*), 6.89 (d, *J* = 8.5 Hz, 2H, PMB-aromatic *H*), 5.91-5.77 (m, 1H, 6-H), 5.05 (*app* d, *J* = 12 Hz, 2H, 7-H), 4.46 (s, 2H, PMB-CH<sub>2</sub>), 3.97-3.83 (m, 2H, 2-H, 4-H), 3.80 (s, 3H, PMB-Me), 3.38 (d, *J* = 4.9 Hz, 2H, 1-H), 2.34-2.12 (m, 2H, 5-H), 1.78-1.58 (m, 2H, 3-H), 0.91 (s, 9H, TBS), 0.90 (s, 9H, TBS), 0.08 (s, 3H, TBS), 0.07 (s, 3H, TBS), 0.05 (s, 3H, TBS), 0.04 (s, 3H, TBS); <sup>13</sup>C NMR (CDCl<sub>3</sub>, 75 MHz) δ 159.0, 135.1, 130.5, 129.2, 116.9, 113.6, 74.6, 72.8, 69.1, 68.8, 55.2, 42.1, 41.6, 25.9, 25.9, 18.1, 18.0, -4.23, -4.41, -4.54, -4.82; HRMS (CI+) *m/z* for C<sub>27</sub>H<sub>49</sub>O<sub>4</sub>Si<sub>2</sub> [M-H]<sup>+</sup>, calc. 493.3169, found 493.3149.

To confirm the relative stereochemistry between C-2 and C-4 (C-9 and C-11 in spinosyn A), compound **35-1** was derivatized to give the corresponding acetonide as follows.<sup>7</sup> **(4*R*,6*R*)-4-Allyl-6-((*p*-methoxybenzyloxy)methyl)-2,2-dimethyl-1,3-dioxane**. To a solution of **35-1**, (79 mg, 0.160 mmol) in tetrahydrofuran (2 mL) at 0 °C was added tetrabutylammonium fluoride (1 M solution in tetrahydrofuran, 0.320 mL, 0.320 mmol). After 30 min stirring, the reaction mixture was warmed to room temperature and stirred for an additional 1 hr. The mixture was then poured into a saturated ammonium chloride solution (10 mL) and extracted with dichloromethane (10 mL × 3). The combined organic extracts were dried over anhydrous sodium sulfate and concentrated under reduced pressure. To a solution of the resulting crude diol (25.8 mg, 96.9 μmol) in dichloromethane (5 mL) was added 2,2-dimethoxypropane (60 μL, 485 μmol) and a catalytic amount of pyridinium *p*-toluenesulfonate (PPTS) at room temperature. After 2 hr, the reaction mixture was concentrated under reduced pressure and subjected to flash column chromatography (hexanes/ethyl acetate = 9/1) to afford the desired acetonide product. <sup>1</sup>H NMR (CDCl<sub>3</sub>, 300 MHz) δ 7.24 (*app* d, *J* = 8.7 Hz, 2H, PMB), 6.85 (*app* d, *J* = 8.7 Hz, 2H, PMB), 5.84-5.70 (m, 1H, 2''-H), 5.10-5.01 (m, 2H, 1''-H), 4.48 (q, *J* = 11.8 Hz, 2H, PMB), 4.08-4.00 (m, 1H, 4-H, or 6-H), 3.92-3.83 (m, 1H, 4-H or 6-H), 3.78 (s, 3H, OMe of PMB), 3.45 (dd, *J* = 10, 5.9 Hz, 1H, 1'-H), 3.31 (dd, *J* = 10, 4.9 Hz, 1H, 1'-H), 2.33-2.24 (m, 1H, 3''-H), 2.14-2.08 (m, 1H, 3''-H), 1.52 (dt, *J* = 12.8, 2.6 Hz, 1H, 5-H), 1.43 (s, 3H, 2-Me), 1.39 (s, 3H, 2-Me), 1.16 (*app* q, *J* = 12 Hz, 1H, 5-H); <sup>13</sup>C NMR (CDCl<sub>3</sub>, 75 MHz) δ 159.2, 134.1, 130.3, 129.4, 117.1, 113.7, 98.6, 73.3, 73.1, 68.5, 68.3, 55.3, 40.8, 33.3, 30.1 (2-Me), 19.8 (2-Me).

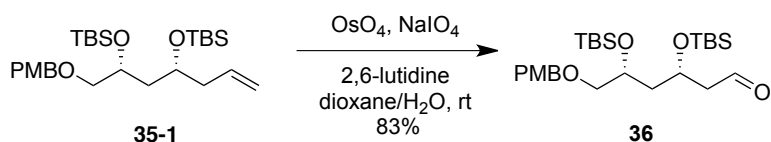

**(3*S*,5*R*)-3,5-Bis(*tert*-butyldimethylsilyloxy)-6-(4-methoxybenzyloxy)hexanal (36).** To a solution of olefin **35-1** (2.45 g, 6.63 mmol) in dioxane/H<sub>2</sub>O = 3/1 (60 mL) was added 2,6-lutidine (1.17 mL, 10.0 mmol), osmium tetroxide (40 mg, 0.16 mmol), and sodium periodate (4.28 g, 20.0 mmol) in sequence at room temperature. After 5 hr of stirring, the solution was mixed with H<sub>2</sub>O (50 mL) and dichloromethane (100 mL). The separated aqueous layer was extracted with dichloromethane (50 mL × 3) and the combined organic extracts were washed with a brine solution (100 mL), dried over anhydrous magnesium sulfate, and concentrated under reduced pressure. The crude residue was subjected to flash column chromatography (hexanes/ethyl acetate = 19/1) to afford aldehyde **36** (2.73 g, 5.50 mmol, 83%). <sup>1</sup>H NMR (CDCl<sub>3</sub>, 500 MHz) δ 9.77 (dd, *J* = 3.2, 2.1 Hz, 1H, 1-H), 7.22 (d, *J* = 8.8 Hz, 2H, PMB-aromatic *H*), 6.85 (d, *J* = 8.6 Hz, 2H, PMB-aromatic *H*), 4.42 (s, 2H, PMB-CH<sub>2</sub>), 4.37-4.32 (m, 1H, 3-H), 3.87-3.82 (m, 1H, 5-H), 3.79 (s, 3H, PMB-Me), 3.37-3.30 (m, 2H, 6-H), 2.58-2.43 (m, 2H, 2-H), 1.75 (t, *J* = 6.8 Hz, 2H, 4-H), 0.85 (s, 9H, TBS), 0.84 (s, 9H, TBS), 0.03-0.02 (m, 12H, TBS); <sup>13</sup>C NMR (CDCl<sub>3</sub>, 125 MHz) δ 202.2, 159.1, 130.25, 129.2, 113.7, 74.3, 72.9, 68.7, 65.5, 55.2, 50.4, 42.7, 25.8, 25.7, 18.1, 17.9, -4.23, -4.41, -4.82, -4.87; HRMS (CI+) *m/z* for C<sub>26</sub>H<sub>47</sub>O<sub>5</sub>Si<sub>2</sub> [M-H]<sup>+</sup>, calc. 495.2962, found 495.2970.

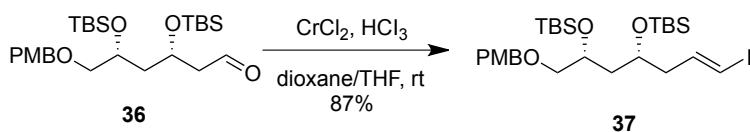

**(2*R*,4*R*,*E*)-1-((4-Methoxybenzyloxy)methyl)-2,4-bis(*tert*-butyldimethylsilyloxy)-7-iodohept-6-ene (37).** To a stirred suspension of chromium(II) chloride (2.89 g, 23.6 mmol) in anhydrous dioxane/tetrahydrofuran = 6/1 (60 mL) was added a solution of aldehyde **36** (2.34 g, 4.71 mmol) and iodoform (3.70 g, 9.42 mmol) in anhydrous dioxane/tetrahydrofuran = 6/1 (5 mL) at 0 °C. The solution was protected from light and allowed to warm to room temperature over 20 hr. The resulting green solution was quenched with H<sub>2</sub>O (50 mL), and the separated aqueous layer was extracted with ethyl acetate (50 mL × 3). The combined organic extracts were washed with a saturated sodium thiosulfate solution (100 mL) and a brine solution (100 mL), dried over anhydrous magnesium sulfate, and concentrated under reduced pressure. The crude residue was subjected to flash column chromatography (hexanes/ethyl acetate = 97/3) to afford vinyl iodide **37** (2.53 g, 4.08 mmol, 87%). <sup>1</sup>H NMR (CDCl<sub>3</sub>, 300 MHz) δ 7.23 (d, *J* = 8.7 Hz, 2H, PMB-aromatic *H*), 6.86 (d, *J* = 8.7 Hz, 2H, PMB-aromatic *H*), 6.53-6.43 (m, 1H, 6-H), 5.99 (d, *J* = 14 Hz, 1H, 7-H), 4.42 (s, 2H, PMB-CH<sub>2</sub>), 3.87-3.81 (m, 2H, 2-H, 4-H), 3.79 (s, 3H, PMB-Me), 3.37-3.27 (m, 2H, 1-H), 2.28-2.20 (m, 1H, 5-H), 2.14-2.04 (m, 1H, 5-H), 1.72-1.54 (m, 2H, 3-H), 0.86 (s, 9H, TBS), 0.85 (s, 9H, TBS), 0.03-0.00 (m, 12H, TBS); <sup>13</sup>C NMR (CDCl<sub>3</sub>, 75 MHz) δ 159.0, 143.2, 130.4, 129.2, 113.7, 74.5, 72.9, 68.9, 68.0, 55.3, 43.4, 42.3, 25.9, 25.8, 18.1, 18.0, -4.20, -4.48, -4.56, -4.79; HRMS (CI+) *m/z* for C<sub>27</sub>H<sub>48</sub>IO<sub>4</sub>Si<sub>2</sub> [M-H]<sup>+</sup>, calc. 619.2136, found 619.2136.

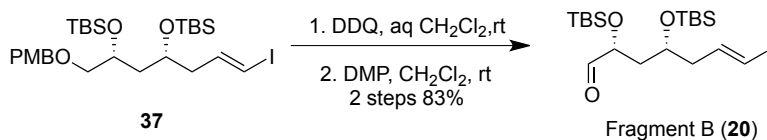

**(2R,4R,E)-2,4-Bis(tert-butyldimethylsilyloxy)-7-iodohept-6-enal (20, fragment B).** To a solution of PMB ether **37** (3.10 g, 4.99 mmol) in CH<sub>2</sub>Cl<sub>2</sub>/H<sub>2</sub>O = 10/1 (150 mL) was added 2,3-dichloro-5,6-dicyano-*p*-benzoquinone (DDQ, 1.36 g, 5.99 mmol) at room temperature. After 1 hr of stirring, the solution was treated with a saturated sodium bicarbonate solution (100 mL). The separated aqueous layer was extracted with dichloromethane (50 mL × 3) and the combined organic extracts were dried over anhydrous magnesium sulfate and concentrated under reduced pressure. The crude residue was subjected to flash column chromatography (hexanes/ethyl acetate = 19/1) to afford a primary alcohol (2.35 g, 4.69 mmol, 94%). <sup>1</sup>H NMR (CDCl<sub>3</sub>, 300 MHz) δ 6.46 (dt, *J* = 14.4, 7.5 Hz, 1H, 6-H), 6.03 (dt, *J* = 14.4, 1.2 Hz, 1H, 7-H), 3.89-3.76 (m, 2H, 2-H, 4-H), 3.58-3.51 (m, 1H, 1-H), 3.48-3.40 (m, 1H, 1-H), 2.30-2.12 (m, 2H, 3-H), 1.73-1.58 (m, 2H, 5-H), 0.87 (s, 9H, TBS), 0.86 (s, 9H, TBS), 0.06-0.03 (m, 12H, TBS); <sup>13</sup>C NMR (CDCl<sub>3</sub>, 75 MHz) δ 142.6, 77.0, 69.8, 68.2, 66.1, 43.7, 41.3, 25.79, 25.77, 18.0, 17.9, -4.36, -4.55, -4.64; HRMS (CI+) *m/z* for C<sub>19</sub>H<sub>42</sub>IO<sub>3</sub>Si<sub>2</sub> [M+H]<sup>+</sup>, calc. 501.1717, found 501.1713.

To a solution of the resulting alcohol (1.00 g, 2.00 mmol) in dichloromethane (25 mL) was added Dess-Martin periodinane (890 mg, 2.10 mmol) at 0 °C. After stirring at room temperature for 1 hr, the solution was diluted with ethyl ether (50 mL). The resulting mixture was washed with a saturated sodium bicarbonate solution (50 mL), a saturated sodium thiosulfate solution (50 mL), and a brine solution (50 mL). The dichloromethane solution was then dried over anhydrous magnesium sulfate and concentrated under reduced pressure. The crude residue was subjected to flash column chromatography (hexanes only to remove iodoform → hexanes/ethyl acetate = 29/1) to afford fragment B (**20**) (891 mg, 1.79 mmol, 89%). <sup>1</sup>H NMR (CDCl<sub>3</sub>, 500 MHz) δ 9.57 (d, *J* = 1.4 Hz, 1H, 1-H), 6.46 (dt, *J* = 14.4, 7.8 Hz, 1H, 6-H), 6.05 (dt, *J* = 14.4, 1.3 Hz, 1H, 7-H), 4.05 (td, *J* = 6.1, 1.4 Hz, 1H, 2-H), 3.98-3.93 (m, 1H, 4-H), 2.29-2.16 (m, 2H, 5-H), 1.83-1.75 (m, 2H, 3-H), 0.90 (s, 9H, TBS), 0.85 (s, 9H, TBS), 0.07-0.04 (m, 12H, TBS); <sup>13</sup>C NMR (CDCl<sub>3</sub>, 125 MHz) δ 203.4, 142.3, 77.1, 74.7, 66.8, 43.5, 40.2, 25.8, 25.7, 18.1, 17.9, -4.36, -4.51, -4.64, -4.95; HRMS (CI+) *m/z* for C<sub>19</sub>H<sub>40</sub>IO<sub>3</sub>Si<sub>2</sub> [M+H]<sup>+</sup>, calc. 499.1561, found 499.1572.

### III.3. Synthesis of Fragment C (21)

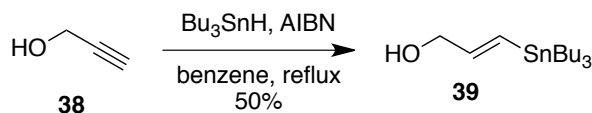

**(E)-3-(Tributylstannyl)prop-2-en-1-ol (39).** The stereoselective tin addition to propargylic alcohol was conducted following a known procedure.<sup>8</sup> Propargylic alcohol (**38**, 1.50 g, 26.7 mmol) was mixed with tributyltin hydride (9.21 mL, 34.7 mmol), to which was added 2,2'-azobis(2-methylpropionitrile) (AIBN, 43.8 mg, 0.267 mmol) at room temperature. The reaction was gradually heated to 80 °C over 1 hr and was allowed to continue overnight under reflux. After completion of the reaction was confirmed by TLC analysis, the crude product was directly subjected to flash column chromatography (hexanes) to afford vinyl tin **39** (4.55 g, 13.1 mmol, 50%). <sup>1</sup>H NMR (CDCl<sub>3</sub>, 400 MHz) δ 6.24-6.11 (m, 2H, 1-H, 2-H), 4.15 (br d, *J* = 3.1 Hz, 2H, 3-H), 1.58-1.43 (m, 6H, Bu<sub>3</sub>Sn), 1.40-1.1.26 (m, 6H, Bu<sub>3</sub>Sn), 0.98-0.80 (m, 15H, Bu<sub>3</sub>Sn); <sup>13</sup>C NMR (CDCl<sub>3</sub>, 100 MHz) δ 147.0, 128.3, 66.4, 29.1, 27.3, 13.7, 9.4.

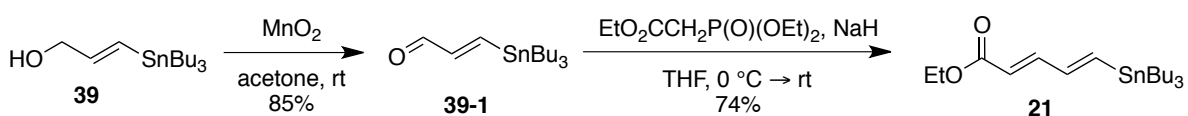

**Ethyl (2E,4Z)-5-(tributylstannyl)penta-2,4-dienoate (21).** To a solution of alcohol **39** (1.54 g, 4.43 mmol) in acetone (50 mL) at room temperature was added activated manganese oxide (3.85 g, 44.3 mmol). After stirring overnight, the reaction mixture was filtered over a pad of Celite to remove manganese oxide. The filtrate was concentrated under reduced pressure. The crude residue was briefly purified by flash column chromatography (hexanes only) to afford aldehyde **39-1** (1.29 g, 3.75 mmol, 85%). The resulting aldehyde was immediately used for the next step, a Horner-Wadsworth-Emmons reaction. To a solution of triethyl phosphonoacetate (1.08 mL, 5.45 mmol) in tetrahydrofuran (15 mL) at 0 °C was slowly added sodium hydride (60% in mineral oil, 327 mg, 5.45 mmol). To the resulting suspension was added aldehyde **39-1** (1.26 g, 3.64 mmol). After stirring at 0 °C for 4 hr, the reaction was quenched by the addition of a saturated ammonium chloride solution (15 mL), and the mixture was extracted with ethyl acetate (20 mL × 3). The combined organic extracts were washed with a brine solution (30 mL), dried over anhydrous magnesium sulfate, and concentrated under reduced pressure. The crude residue was subjected to flash column chromatography (hexanes/ethyl acetate = 39/1) to afford fragment C for the Stille coupling (**21**, 1.10 g, 2.65 mmol, 74%). <sup>1</sup>H NMR (CDCl<sub>3</sub>, 400 MHz) δ 7.18 (dd, *J* = 15.4, 10.2 Hz, 1H, 3-H), 6.81 (d, *J* = 18.8 Hz, 1H, 1-H), 6.64 (dd, *J* = 18.8, 10.2 Hz, 1H, 2-H), 5.79 (d, *J* = 15.4 Hz, 1H, 4-H), 4.20 (q, *J* = 7.1 Hz, 1H, CH<sub>3</sub>CH<sub>2</sub>OCO), 1.56-1.41 (m, 6H, Bu<sub>3</sub>Sn), 1.30-1.26 (m, 9H, Bu<sub>3</sub>Sn), 0.95-0.78 (m, 15H, Bu<sub>3</sub>Sn, CH<sub>3</sub>CH<sub>2</sub>OCO); <sup>13</sup>C NMR (CDCl<sub>3</sub>, 100 MHz) δ 167.4, 147.2, 146.3, 144.2, 119.9, 60.2, 29.0, 27.2, 13.7, 9.6; HRMS (CI<sup>+</sup>) *m/z* for C<sub>19</sub>H<sub>37</sub>O<sub>2</sub>Sn [M+H]<sup>+</sup>, calc. 417.1816, found 417.1821.

#### III.4. Completion of the Synthesis of the Presumed Post-PKS Precursor (11)

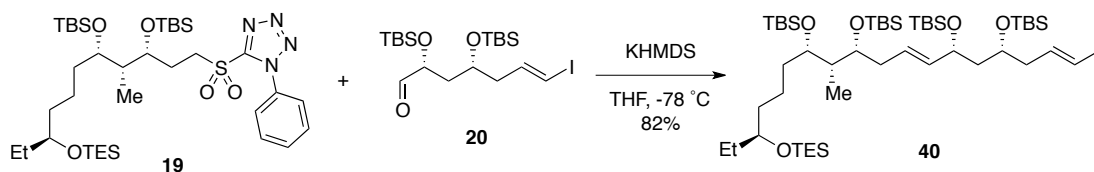

**(1E,4R,6R,7E,10R,11R,12S,16S)-4,6,10,12-Tetrakis(*tert*-butyldimethylsilyloxy)-11-methyl-16-(triethylsilyloxy)-1-iodooctadeca-1,7-diene (40).** To a solution of fragment A (**19**) (0.594 g, 0.772 mmol) in tetrahydrofuran (5 mL) at -78 °C was added potassium hexamethyldisilazide (KHMDS, 0.5 M in toluene, 1.85 mL, 0.927 mmol) dropwise over 10 min, and the mixture was stirred at -78 °C for 1 hr, at which time fragment B (**20**) (0.413 g, 0.849 mmol) was added to the resulting yellow solution at -78 °C. After stirring for 4 hr, the temperature was slowly raised to room temperature over 1 hr, and the reaction mixture was poured into a saturated sodium bicarbonate solution (10 mL). The resulting mixture was extracted with ethyl acetate (20 mL × 3), washed with a brine solution (20 mL), dried over anhydrous magnesium sulfate, and concentrated under reduced pressure. The residue was subjected to short column chromatography (hexanes only) to afford the vinyl iodide **40** (663 mg, 0.636 mmol, 82%). <sup>1</sup>H NMR (CDCl<sub>3</sub>, 500 MHz) δ 6.49 (ddd, *J* = 14.4, 8, 7 Hz, 1H, 2-H), 5.99 (d, *J* = 14.4 Hz, 1H, 1-H), 5.51 (dt, *J* = 15.5, 6.6 Hz, 1H, 8-H), 5.38 (dd, *J* = 15.5, 6.9 Hz, 1H, 7-H), 4.08 (*br* q, *J* = 12.6, 6.9 Hz, 1H, 6-H), 3.80 (*br* quint, *J* = 17.0, 11.8, 6.6 Hz, 1H, 4-H), 3.74 (q, *J* = 5.5 Hz, 1H, 10-H), 3.66 (*br* q, *J* = 10.5, 5.5 Hz, 1H, 11-H), 3.56 (quint, *J* = 5.8 Hz, 1H, 16-H), 2.30-2.22 (m, 3H, 3-H, 9-H), 2.08-2.14 (m, 1H, 3-H), 1.70 (ddd, *J* = 13.5, 7.7, 5.5 Hz, 1H, 5-H), 1.59-1.20 (m, 10H, 5-H, 11-H, 13-H, 14-H, 15-H, 17-H), 0.94 (t, *J* = 7.8 Hz, 9H, TES), 0.87-0.83 (m, 42H, TBS, 11-Me, 18-H), 0.57 (q, *J* = 7.8 Hz, 6H, TES), 0.04-(-0.01) (m, 24H, TBS); <sup>13</sup>C NMR (CDCl<sub>3</sub>, 125 MHz) δ 143.3, 135.5, 126.8, 76.4, 73.3, 73.0, 72.2, 70.8, 68.2, 46.0, 43.5, 41.3, 38.0, 37.3, 35.5, 29.5, 26.0, 25.9, 25.8, 21.0, 18.2, 18.14, 18.11, 18.0, 9.7, 9.5, 7.0, 5.1, -3.7, -3.8, -3.9, -4.3, -4.35, -4.4, -4.5, -4.7; HRMS (CI<sup>+</sup>) *m/z* for C<sub>49</sub>H<sub>105</sub>O<sub>5</sub>Si<sub>5</sub>I [M+1]<sup>+</sup>, calc. 1041.5926, found 1041.5837.

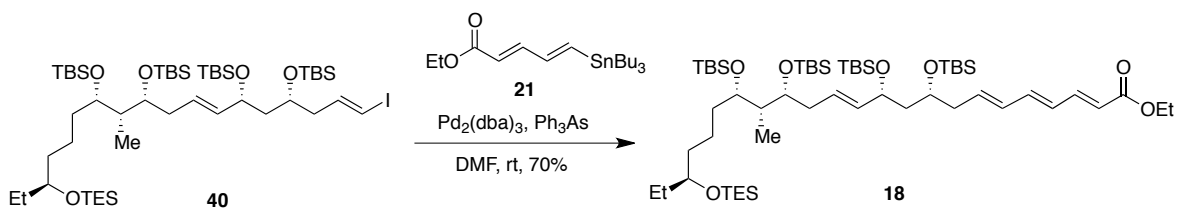

**Ethyl (2E,4E,6E,9R,11R,12E,15R,16R,17S,21S)-9,11,15,17-tetrakis(*tert*-butyldimethylsilyloxy)-16-methyl-21-(triethylsilyloxy)tricoso-2,4,6,12-tetraenoate (18).** To a solution of vinyl iodide **40** (485 mg, 0.466 mmol) and vinyl stannane **21** (165 mg, 1.31 mmol) in dimethylformamide (5 mL) at room temperature was added tris(dibenzylideneacetone)dipalladium(0) (21 mg, 0.023 mmol) and triphenylarsine (19 mg, 0.060 mmol). After 3 hr of stirring, the reaction



mixture was concentrated under reduced pressure and diluted with water (10 mL). The suspension mixture was extracted with ethyl acetate (10 mL × 3). Then, the combined organic extracts were washed with a brine solution (20 mL), dried over anhydrous magnesium sulfate, and concentrated under reduced pressure. The crude residue was subjected to flash column chromatography (hexanes/ethyl acetate = 49/1) to afford (*E*)-triene **18** (339 mg, 0.326 mmol, 70%) as a single product. <sup>1</sup>H NMR (CDCl<sub>3</sub>, 500 MHz) δ 7.27 (dd, *J* = 15.1, 11.3 Hz, 1H, 3-H), 6.50 (dd, *J* = 14.8, 10.5 Hz, 1H, 5-H), 6.19 (dd, *J* = 14.8, 11.3 Hz, 1H, 4-H), 6.12 (dd, *J* = 15.3, 10.5 Hz, 1H, 6-H), 5.88 (dt, *J* = 15.3, 7.5 Hz, 1H, 7-H), 5.82 (d, *J* = 15.1 Hz, 1H, 2-H), 5.51 (dt, *J* = 15.5, 7.2 Hz, 1H, 13-H), 5.38 (dd, *J* = 15.5, 6.8 Hz, 1H, 12-H), 4.18 (q, *J* = 7.2 Hz, 2H, CH<sub>3</sub>CH<sub>2</sub>OC(O)), 4.11 (*br* q, *J* = 12.9, 6.8 Hz, 1H, 11-H), 3.80 (quint, *J* = 5.9 Hz, 1H, 9-H), 3.74 (q, *J* = 5.5 Hz, 1H, 15-H), 3.66 (*br* q, *J* = 10.5, 5.5 Hz, 1H, 17-H), 3.56 (quint, *J* = 5.8 Hz, 1H, 21-H), 2.39-2.34 (m, 1H, 8-H), 2.24-2.18 (m, 3H, 14-H, 8-H), 1.70 (ddd, *J* = 13.7, 7.5, 5.9 Hz, 1H, 10-H), 1.61-1.35 (m, 10H, 10-H, 16-H, 18-H, 19-H, 20-H, 22-H), 1.27 (t, *J* = 7.2 Hz, 3H, CH<sub>3</sub>CH<sub>2</sub>OC(O)), 0.94 (t, *J* = 7.9 Hz, 9H, TES), 0.87-0.83 (m, 42H, TBS, 16-Me, 23-H), 0.57 (q, *J* = 7.9 Hz, 6H, TES), -0.01-0.04 (m, 24H, TBS); <sup>13</sup>C NMR (CDCl<sub>3</sub>, 125 MHz) δ 167.2, 144.7, 140.9, 136.6, 135.6, 132.0, 128.1, 126.8, 120.3, 73.3, 73.0, 72.3, 70.8, 69.0, 60.2, 46.2, 41.3, 40.8, 38.0, 37.3, 35.5, 29.5, 26.0, 25.9, 25.8, 21.0, 18.2, 18.1, 18.0, 14.3, 9.65, 9.51, 6.97, 5.13, -3.74, -3.80, -3.93, -4.27, -4.32, -4.37, -4.53, -4.73; HRMS (CI<sup>-</sup>) *m/z* for C<sub>56</sub>H<sub>114</sub>O<sub>7</sub>Si<sub>5</sub> [M], calc. 1038.7411, found 1038.7416.

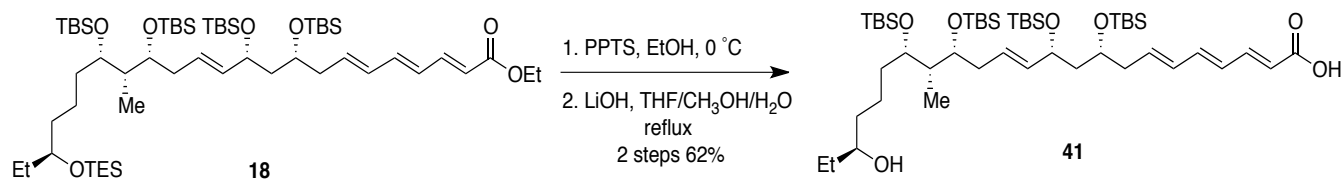

**(2*E*,4*E*,6*E*,9*R*,11*R*,12*E*,15*R*,16*R*,17*S*,21*S*)-9,11,15,17-Tetrakis(*tert*-butyldimethylsilyloxy)-21-hydroxy-16-methyl-tricosa-2,4,6,12-tetraenoic acid (**41**). To a solution of triene **18** (101 mg, 0.0971 mmol) in ethanol (2 mL) at 0 °C was added pyridinium *p*-toluenesulfonate (PPTS, 2.4 mg, 0.0097 mmol). After 2 hr stirring at 0 °C, the reaction mixture was poured into a brine solution (5 mL), extracted with ethyl acetate (10 mL × 3), dried over anhydrous magnesium sulfate, and concentrated under reduced pressure. The crude residue was subjected to flash column chromatography (hexanes/ethyl acetate = 19/1) to afford the corresponding secondary alcohol (70.2 mg, 0.0758 mmol, 78%). <sup>1</sup>H NMR (CDCl<sub>3</sub>, 500 MHz) δ 7.28 (dd, *J* = 15.2, 11.4 Hz, 1H, 3-H), 6.51 (dd, *J* = 14.8, 10.7 Hz, 1H, 5-H), 6.19 (dd, *J* = 14.8, 11.4 Hz, 1H, 4-H), 6.12 (dd, *J* = 15.2, 10.7 Hz, 1H, 6-H), 5.89 (dt, *J* = 15.2, 7.6 Hz, 1H, 7-H), 5.82 (d, *J* = 15.2 Hz, 1H, 2-H), 5.54 (dt, *J* = 15.5, 7.1 Hz, 1H, 13-H), 5.40 (dd, *J* = 15.5, 6.9 Hz, 1H, 12-H), 4.18 (q, *J* = 7.2 Hz, 2H, CH<sub>3</sub>CH<sub>2</sub>OC(O)), 4.12 (*br* q, *J* = 13.1, 6.5 Hz, 1H, 11-H), 3.80 (*br* quint,**

$J = 17.5, 11.8, 6.2$  Hz, 1H, 9-H), 3.73 (*app* q,  $J = 5.5$  Hz, 1H, 15-H), 3.67 (*app* q,  $J = 5.4$  Hz, 1H, 17-H), 3.48 (m, 1H, 21-H), 2.39-2.34 (m, 1H, 8-H), 2.24-2.18 (m, 3H, 8-H, 14-H), 1.70 (ddd,  $J = 13.5, 7.2, 6.2$  Hz, 1H, 10-H), 1.61-1.35 (m, 11H, 10-H, 16-H, 18-H, 19-H, 20-H, 22-H), 1.27 (t,  $J = 7.2$  Hz, 3H,  $\text{CH}_3\text{CH}_2\text{OC}(\text{O})$ ), 0.94 (t,  $J = 7.5$  Hz, 3H, 23-H), 0.83-0.87 (m, 39H, TBS, 16-Me), 0.04-(-0.01) (m, 24H, TBS);  $^{13}\text{C}$  NMR ( $\text{CDCl}_3$ , 125 MHz)  $\delta$  167.2, 144.7, 140.9, 136.4, 135.7, 132.1, 128.2, 126.8, 120.3, 73.0, 72.6, 72.2, 70.8, 69.0, 60.2, 46.2, 40.8, 40.7, 37.7, 37.4, 35.1, 30.1, 29.7, 25.9, 25.7, 21.3, 18.2, 18.16, 18.13, 18.0, 14.3, 9.9, 9.3, -3.77, -3.82, -3.99, -4.28, -4.38, -4.59, -4.71; HRMS ( $\text{CI}^-$ )  $m/z$  for  $\text{C}_{50}\text{H}_{100}\text{O}_7\text{Si}_4$  [M] $^-$ , calc. 924.6546, found 924.6544. To a solution of the alcohol obtained from the previous step (176 mg, 0.190 mmol) in tetrahydrofuran (4 mL) and methanol (4 mL) at room temperature was added 0.5 N lithium hydroxide solution (4 mL), and the mixture was stirred under reflux for 3 hr. The volatile solvents were then evaporated under reduced pressure and the pH of the aqueous solution was adjusted to around 6. The mixture was extracted with dichloromethane (10 mL  $\times$  3), washed with a brine solution (10 mL), dried over magnesium sulfate, and concentrated under reduced pressure. The crude residue was subjected to flash column chromatography (hexanes/ethyl acetate = 4/1 to 2/1) to afford *seco*-acid **41** (135 mg, 0.150 mmol, 79%).  $^1\text{H}$  NMR ( $\text{CDCl}_3$ , 500 MHz)  $\delta$  7.36 (dd,  $J = 15.1, 11.3$  Hz, 1H, 3-H), 6.55 (dd,  $J = 14.8, 10.5$  Hz, 1H, 5-H), 6.22 (dd,  $J = 14.8, 11.3$  Hz, 1H, 4-H), 6.14 (dd,  $J = 15.1, 10.5$  Hz, 1H, 6-H), 5.94 (dt,  $J = 15.1, 7.4$  Hz, 1H, 7-H), 5.82 (d,  $J = 15.1$  Hz, 1H, 2-H), 5.54 (dt,  $J = 15.5, 7.2$  Hz, 1H, 13-H), 5.39 (dd,  $J = 15.5, 6.8$  Hz, 1H, 12-H), 4.12 (*br* q,  $J = 13.4, 6.4$  Hz, 1H, 11-H), 3.81 (*br* quint,  $J = 17.5, 11.7, 6.1$  Hz, 1H, 9-H), 3.73 (q,  $J = 5.5$  Hz, 1H, 15-H), 3.67 (*br* q,  $J = 10.5, 5.5$  Hz, 1H, 17-H), 3.51-3.45 (m, 1H, 21-H), 2.39-2.34 (m, 1H, 8-H), 2.24-2.18 (m, 3H, 8-H, 14-H), 1.70 (ddd,  $J = 13.5, 7.2, 6.4$  Hz, 1H, 10-H), 1.61-1.18 (m, 10H, 10-H, 16-H, 18-H, 19-H, 20-H, 22-H), 0.92 (t,  $J = 7.5$  Hz, 3H, 23-H), 0.87-0.83 (m, 36H, TBS), 0.83 (d,  $J = 6.9$  Hz, 3H, 16-Me) 0.04-(-0.01) (m, 24H, TBS);  $^{13}\text{C}$  NMR ( $\text{CDCl}_3$ , 125 MHz)  $\delta$  171.3, 147.0, 142.0, 137.4, 135.6, 132.0, 127.9, 126.9, 119.1, 73.1, 72.6, 72.2, 70.9, 69.0, 46.1, 40.8, 40.6, 37.7, 37.4, 35.1, 30.1, 25.95, 25.93, 25.87, 21.3, 18.2, 18.16, 18.13, 18.0, 9.9, 9.3, -3.77, -3.82, -3.99, -4.28, -4.370, -4.378 -4.59, -4.71; HRMS ( $\text{CI}^-$ )  $m/z$  for  $\text{C}_{48}\text{H}_{96}\text{O}_7\text{Si}_4$  [M] $^-$ , calc. 896.6233, found 896.6230.

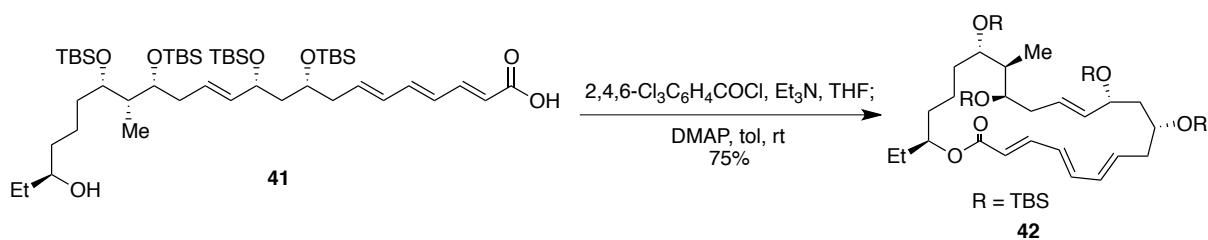

**9,11,15,17-Tetrakis(*tert*-butyldimethylsilyloxy)-macrolactone (42).** A solution of triethylamine (0.04 M in tetrahydrofuran, 7.5 mL, 0.30 mmol) was mixed with *seco*-acid **41** (135 mg, 0.150 mmol). To that mixture at room

temperature was added 2,4,6-trichlorobenzoyl chloride solution (0.04 M in tetrahydrofuran, 4.1 mL, 0.165 mmol). The reaction continued with stirring at room temperature for 1.5 hr, at which time the mixture was filtered over a pad of Celite, and the filtrate was concentrated under reduced pressure to afford a crude mixed anhydride. To a solution of *N,N*-dimethylaminopyridine (DMAP, 36.7 mg, 0.300 mmol) was added a solution of the obtained mixed anhydride in toluene (0.01 M, 15 mL) using a syringe pump over 2 hr, after which the syringe was rinsed with an additional 1 mL of toluene. After stirring for an additional 1 hr, the reaction mixture was poured into a saturated sodium bicarbonate solution (15 mL), extracted with ethyl acetate (15 mL  $\times$  3), washed with a brine solution (15 mL), dried over anhydrous magnesium sulfate, and concentrated under reduced pressure. The crude residue was subjected to flash column chromatography (hexanes/ethyl acetate = 49/1) to afford macrolactone **42** (99.2 mg, 0.113 mmol) in 75% yield.  $^1\text{H NMR}$  ( $\text{CDCl}_3$ , 500 MHz)  $\delta$  7.24 (dd,  $J = 15.3, 11.3$  Hz, 1H, 3-H), 6.47 (dd,  $J = 14.8, 10.7$  Hz, 1H, 5-H), 6.21 (dd,  $J = 14.8, 11.3$  Hz, 1H, 4-H), 6.11 (dd,  $J = 15.3, 10.7$  Hz, 1H, 6-H), 5.79 (d,  $J = 15.3$  Hz, 1H, 2-H), 5.80-5.75 (m, 1H, 7-H), 5.38 (dt,  $J = 15.5, 7.2$  Hz, 1H, 13-H), 5.27 (dd,  $J = 15.5, 6.8$  Hz, 1H, 12-H), 4.88-4.83 (m, 1H, 21-H), 4.01 (*br q*,  $J = 13.5, 6.8$  Hz, 1H, 11-H), 3.75 (*br ddd*,  $J = 14.4, 8.9, 5.1$  Hz, 1H, 9-H), 3.67 (*br q*,  $J = 9.0, 5.5$  Hz, 1H, 15-H), 3.57 (*br q*,  $J = 10.2, 5.5$  Hz, 1H, 17-H), 2.46-2.42 (m, 1H, 8-H), 2.24-2.18 (m, 2H, 14-H, 8-H), 2.12-2.08 (m, 1H, 14-H), 1.69-1.17 (m, 11H, 10-H, 16-H, 18-H, 19-H, 20-H, 22-H), 0.91 (t,  $J = 7.5$  Hz, 3H, 23-H), 0.874 (s, 9H, TBS), 0.867 (s, 9H, TBS), 0.85 (s, 9H, TBS), 0.83 (s, 9H, TBS), 0.74 (d, 3H,  $J = 6.9$  Hz, 16-Me) 0.04-(-0.01) (m, 24H, TBS);  $^{13}\text{C NMR}$  ( $\text{CDCl}_3$ , 125 MHz)  $\delta$  167.0, 144.8, 140.9, 136.0, 135.2, 132.0, 128.0, 127.1, 120.8, 75.2, 73.2, 72.1, 71.1, 69.1, 46.6, 42.4, 42.1, 38.4, 34.4, 33.4, 29.7, 27.8, 26.04, 25.99, 25.91, 25.8, 21.1, 18.18, 18.14, 18.08, 18.02, 10.2, 9.9, -3.47, -3.87, -3.97, -4.33, -4.41, -4.53 -4.62; HRMS ( $\text{CI}^-$ )  $m/z$  for  $\text{C}_{48}\text{H}_{94}\text{O}_6\text{Si}_4$  [ $\text{M}$ ] $^-$ , calc. 878.6128, found 878.6128.

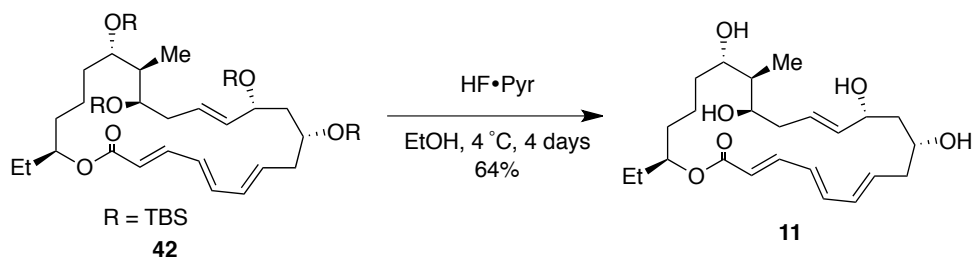

**Monomacrolactone (11).** To a solution of protected macrolactone **42** (31.2 mg, 35.4  $\mu\text{mol}$ ) in ethanol (3 mL) was added hydrogen fluoride pyridine complex (0.3 mL) at 0  $^\circ\text{C}$ . The reaction was stirred for 4 days while the temperature was maintained at 4  $^\circ\text{C}$ . After completion of the reaction was confirmed by TLC analysis, the reaction was quenched by carefully addition of a saturated sodium bicarbonate solution at 0  $^\circ\text{C}$ . The mixture was then extracted with chloroform (20 mL  $\times$  3), and the combined organic extracts were dried over anhydrous magnesium sulfate and concentrated under reduced pressure.

The crude residue was subjected to flash column chromatography ( $\text{CH}_2\text{Cl}_2/\text{CH}_3\text{OH} = 93/7$ ) to afford macrolactone **11** (9.6 mg, 22  $\mu\text{mol}$ ) in 64% yield.  $^1\text{H}$  NMR ( $\text{DMSO-d}_6$ , 500 MHz)  $\delta$  7.25 (dd,  $J = 15.2, 11.3$  Hz, 1H, 3-H), 6.70 (dd,  $J = 14.9, 10.9$  Hz, 1H, 5-H), 6.35 (dd,  $J = 14.9, 11.3$  Hz, 1H, 4-H), 6.18 (dd,  $J = 15.2, 10.9$  Hz, 1H, 6-H), 5.89 (ddd,  $J = 15.2, 10.3, 5.4$  Hz, 1H, 7-H), 5.85 (d,  $J = 15.2$  Hz, 1H, 2-H), 5.29 (*app* dd,  $J = 15.4, 7.2$  Hz, 1H, 12-H), 5.18 (ddd,  $J = 15.4, 7.6, 5.9$  Hz, 1H, 13-H), 4.75 (quint,  $J = 6.2$  Hz, 1H, 21-H), 4.64 (*br s*, 1H, OH), 4.51 (*br s*, 1H, OH), 4.38 (*br m*, 2H, OH), 3.81-3.74 (m, 1H, 11-H), 3.72-3.66 (m, 1H, 9-H), 3.52-3.48 (m, 1H, 15-H), 3.47-3.43 (m, 1H, 17-H), 2.52-2.50 (m, 1H, 8-H), 2.08-1.86 (m, 3H, 8-H, 14-H), 1.60-1.45 (m, 5H, 10-H, 19-H, 22-H), 1.40-1.21 (m, 5H, 10-H, 18-H, 20-H), 1.19-1.54 (m, 1H, 16-H), 0.84 (t,  $J = 7.3$  Hz, 3H, 23-H), 0.67 (d,  $J = 7.1$  Hz, 3H, 16-Me);  $^{13}\text{C}$  NMR ( $\text{DMSO-d}_6$ , 125 MHz)  $\delta$  165.9, 144.7, 141.5, 137.0, 136.2, 131.7, 127.8, 126.0, 120.2, 74.7, 74.4, 73.3, 69.4, 66.9, 54.9, 45.8, 42.8, 38.4, 33.8, 32.8, 27.3, 21.3, 9.72, 6.06, ; HRMS (CI-)  $m/z$  for  $\text{C}_{24}\text{H}_{38}\text{O}_6$  [M], calc. 422.2668, found 422.2664.

#### IV. Evaluation of the Effect of SpnF on the Transformation From Compound **12** to Compound **16**

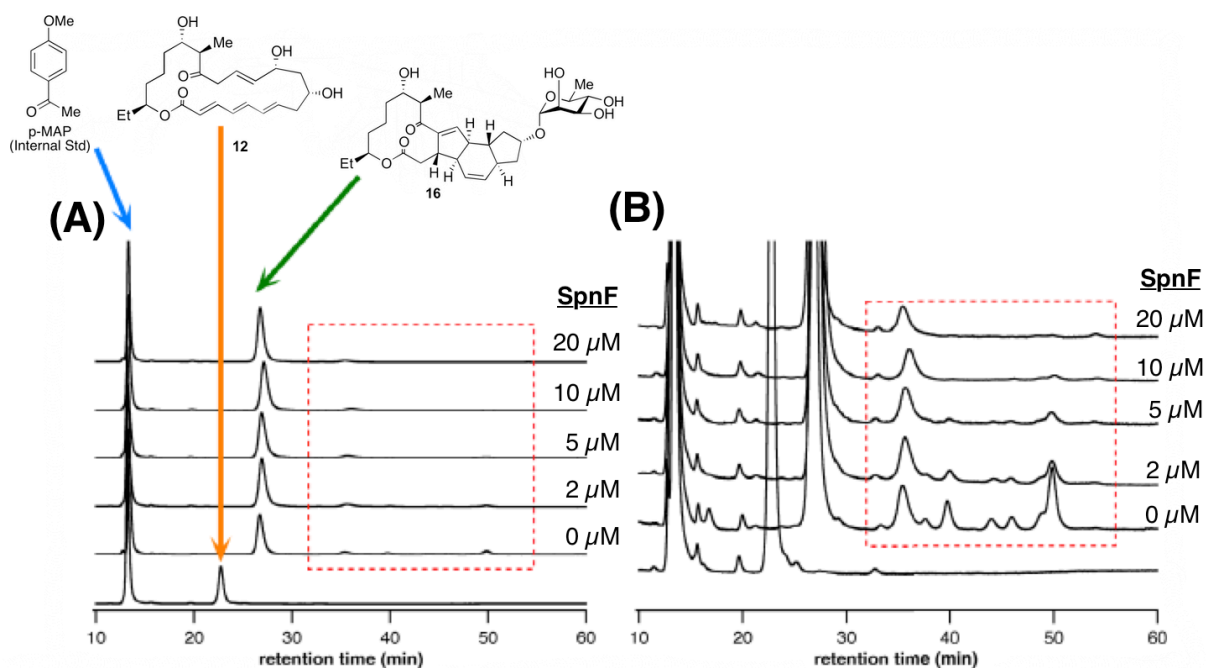

**Figure S1.** Evaluation of the physiological role of SpnF. (A) HPLC traces of a series of enzymatic reactions converting **12** and TDP-L-rhamnose (**5**) to **16** catalyzed by SpnM, SpnF, SpnL, and SpnG in which concentrations of SpnF were varied from 0  $\mu\text{M}$  to 20  $\mu\text{M}$  (*p*-MAP was used as the internal standard). (B) The amplitude of the HPLC traces was enlarged for analysis of the by-product profile of each incubation.

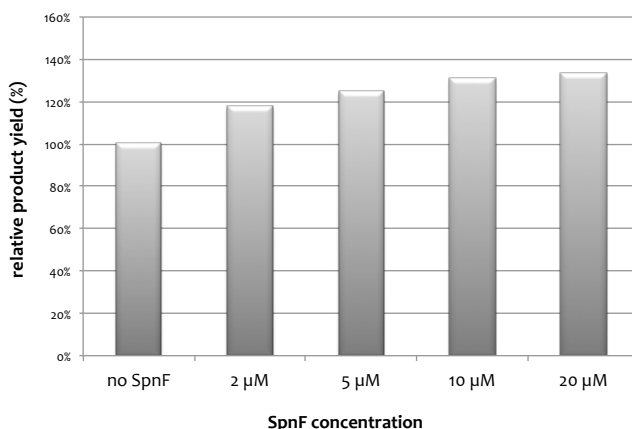

**Figure S2.** Effect of the SpnF concentration on the product yield of a series of reactions converting **12** to **16** catalyzed by SpnM, SpnF, SpnL, and SpnG. Relative product yields were calculated in reference to that of the incubation without SpnF. The yield of the latter case was set to be 100%.

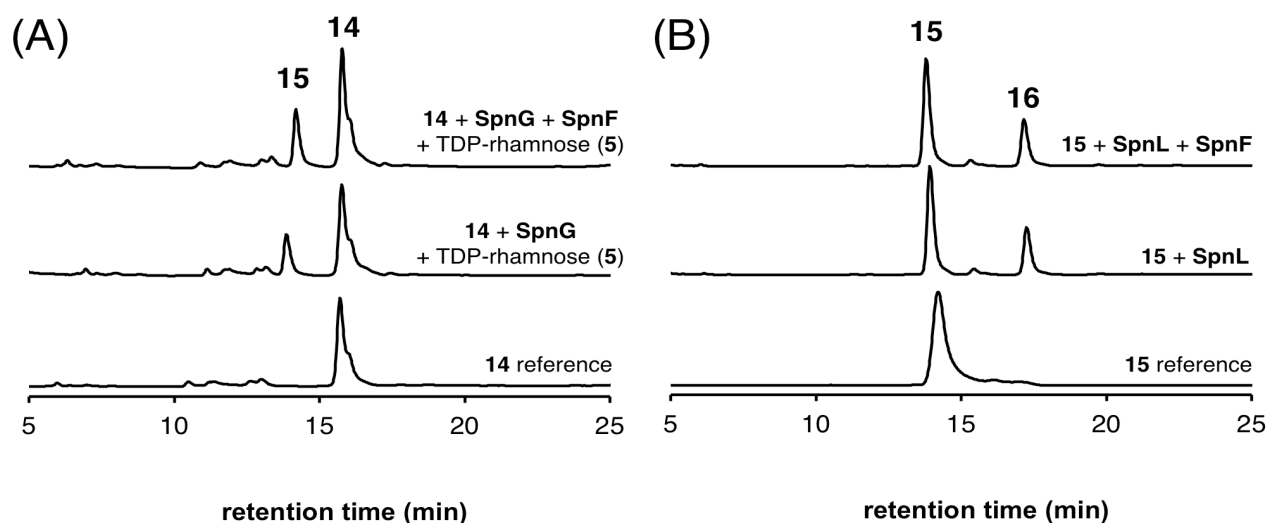

**Figure S3.** HPLC traces of the experiments to investigate the effect of SpnF on (A) the SpnG and (B) the SpnL reactions.

To investigate the effect of SpnF on the cycloaddition reaction, the following reactions were conducted. To a solution containing compound **12** (500  $\mu\text{M}$ ), TDP-L-rhamnose (chemoenzymatically prepared, 1 mM),<sup>4</sup> *p*-methoxyacetophenone (*p*-MAP as the internal standard, 500  $\mu\text{M}$ ), SpnF (concentration varied), SpnL (20  $\mu\text{M}$ ), and SpnG (15  $\mu\text{M}$ ) in 50  $\mu\text{L}$  of 50 mM Tris•HCl (pH 8) buffer at 30 °C, SpnM (0.5  $\mu\text{M}$ ) was added to initiate the enzymatic reaction. After 4 hr of incubation, at which point the substrate was completely consumed, the reaction was quenched by adding 200  $\mu\text{L}$  of ethanol and the denatured enzymes were pelleted by centrifugation. The supernatant was then subjected to HPLC analysis to check the product profile (Varian Microsorb-MV 100-5 C18 250  $\times$  4.6 mm, flow rate = 1 mL/min, UV detection at 280 nm). The

products were eluted with water (A) and acetonitrile (B) using the linear gradient from 31% B to 36% B over 70 min. In this set of experiments, the concentrations of SpnF were varied from 0  $\mu\text{M}$  to 20  $\mu\text{M}$  to evaluate its effect on the product profile. As shown in Figure S1, when the concentration of SpnF increased, the reaction became “cleaner” since formation of byproducts eluted between 35 min and 50 min was significantly suppressed. It is important to note that the retention times of these peaks do not match with any of the characterized “on-path” intermediates. In addition, the product yield increased by nearly 30% when 20  $\mu\text{M}$  SpnF was used as compared to its absence (Figure S2).

To test the possibility that the observed yield increase by SpnF is due to its positive influence on the rates of other participating enzymes through protein-protein interactions, the extents of substrate consumption in the absence and presence of SpnF were compared at a common time point. Specifically, SpnG (2.5  $\mu\text{M}$ ) or SpnL (2.5  $\mu\text{M}$ ) was added to a solution containing the corresponding substrate (100  $\mu\text{M}$  of **14** and 200  $\mu\text{M}$  of **5** for SpnG, 500  $\mu\text{M}$  of **15** for SpnL) in 50 mM Tris·HCl buffer (pH 8), and the mixture was incubated at 30 °C for 40 min or 90 min, respectively, before analyzed by HPLC (Varian Microsorb-MV 100-5 C18 250  $\times$  4.6 mm, flow rate = 1 mL/min, UV detection at 254 nm, a linear gradient from 30% B to 45% B over 20 min where A: H<sub>2</sub>O and B: acetonitrile). Another set of reactions under the same conditions except for inclusion of SpnF (10  $\mu\text{M}$ ) was also performed in parallel to investigate the effect of SpnF on these two respective reactions. As shown in Figure S3, supplementation of SpnF appeared to have no apparent effect on the extents of both SpnL- and SpnG-catalyzed reactions. In addition, it was demonstrated in our previous communication<sup>2</sup> that catalysis by SpnM is independent of SpnF. Thus, suppression of the off-path intermediates by SpnF shown in Figure S1 and S2 is unlikely due to its interactions with other enzymes. Based on these observations, we propose that SpnF suppresses formation of the off-path byproducts such as diastereomeric isomers and/or nucleophilic-addition adducts by accelerating the cycloaddition step, thus ensuring rapid enzymatic turnover of the chemically reactive intermediate **13** to **14**.

## V. Chemoenzymatic Reconstitution of the Post-PKS Modifications to Produce Spinosyn A (**1**)

The enzymatic production of 17-pseudoaglycone (**17**) from the PKS product (**11**) was achieved under the following reaction conditions. Initially, the “multi-step, one-pot” tandem enzymatic conversion of **11** to **17** was tested under the condition where the concentrations of enzymes from operon III, SpnG and SpnH, were set at 1  $\mu\text{M}$  based on our previous results from the investigation of the rhamnose methylation events.<sup>4</sup> However, under this condition, the conversion was slow and incomplete. Analysis of the reaction mixture revealed that the SpnH-catalyzed reaction, methylation at the *O4*-position of the rhamnose moiety, was the bottleneck. Thus, we decided to increase the concentrations of enzymes from operon III from 1  $\mu\text{M}$  to 3  $\mu\text{M}$ . **One-pot enzymatic conversion of the macrolactone intermediate 11 to 17-pseudoaglycone (17):** To a

solution containing compound **11** (1 mM), TDP-L-rhamnose (1.7 mM), MgCl<sub>2</sub> (2 mM), SAM (15 mM), SpnM (5 μM), SpnF (20 μM), SpnG (3 μM), SpnL (5 μM), SpnI (10 μM), SpnK (5 μM), and SpnH (3 μM) in 250 μL of 50 mM Tris•HCl (pH 8) buffer at 30 °C, SpnJ (5 μM) was added to initiate the reaction. After 4 days of incubation, at which point the substrate was completely consumed, the reaction was quenched by the addition of 250 μL of a cold 1:1 mixture of DMSO/CH<sub>3</sub>CN and the denatured enzymes were pelleted by centrifugation. The supernatant (20 μL) was then subjected to reverse phase HPLC analysis (Alltech 4 × 250 mm Econosil C18 column, flow rate = 1mL/min, UV detection at 254 nm). The products were eluted with water (A) and acetonitrile (B) using the linear gradient from 30% B to 60% B over 60 min (see Figure 1B). The product yield was calculated to be 19.6% (average yield per step = 81.6%) by interpolating the integrated peak area with respect to the standard calibration curve made with standard samples of PSA-17 (**17**) whose concentrations was varied from 0.1 mM to 0.8 mM.

It should be noted that the curves shown the HPLC trace shown in Figure 1 in the main text is not a reliable indicator with regards to quantitating side reactions and/or decomposition products due to variability in their extinction coefficients at 254 nm. In other words, the minor peaks in some cases (e.g., those in Figure 1B (b)) are likely deceptively small, and some possibly significant decomposition products may not be observable by HPLC at all. While it was challenging to purify and characterize these minor impurities, we managed to isolate the major byproduct(s) from the SpnM reaction, which appeared to be the *cis*-isomer(s) of **13**. However, full characterization of this compound was not possible due to its scarcity.

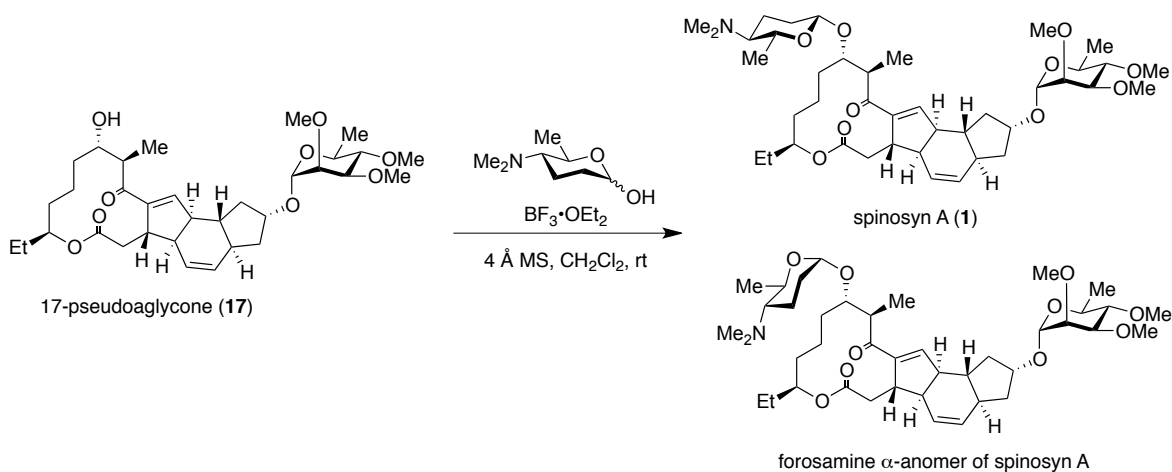

**Lewis acid promoted attachment of D-forosamine to 17-pseudoaglycone (**17**) to afford spinosyn A (**1**):** To a solution of D-forosamine<sup>9</sup> (126 mg, 0.79 mmol), 17-pseudoaglycone (**17**, 46.7 mg, 0.0791 mmol), and activated 4 Å molecular sieve in dichloromethane (5 mL) was added trifluoroboron etherate (BF<sub>3</sub>•Et<sub>2</sub>O, 0.1 mL, 0.08 mmol) over 3 min at 0 °C. The

reaction was stirred at 0 °C for 15 min. Then, the ice bath was removed and the reaction mixture was slowly warmed to room temperature. After 6 hr, the reaction was quenched with 2~3 drops of saturated aqueous sodium bicarbonate. Then, the aqueous phase was extracted with dichloromethane (3 mL × 3). The combined organic layers were dried over anhydrous sodium sulfate and concentrated under reduced pressure. The crude residue was then subjected to flash column chromatography (SiO<sub>2</sub>, MeOH/dichloromethane = 3/97) to afford 2:3 mixture of **1** and its  $\alpha$ -anomer (16.8 mg combined, 29.0%, adjusted 62.5% based on the recovered **17**) with the recovery of 25 mg of 17-pseudoaglycone (**17**, 53.5%). The <sup>1</sup>H-NMR spectra of both compounds were consistent with the previously reported data.<sup>10,11</sup> Spinosyn A (**1**): <sup>1</sup>H NMR (CDCl<sub>3</sub>, 400 MHz)  $\delta$  6.75 (s, 1H, 13-H), 5.86 (d,  $J$  = 9.6 Hz, 1H, 6-H), 5.78 (dt,  $J$  = 9.6, 2.8 Hz, 1H, 5-H), 4.86 (d,  $J$  = 1.6 Hz, 1H, 1'-H), 4.68-4.62 (m, 1H, 21-H), 4.41 (d,  $J$  = 7.0 Hz, 1H, 1''-H), 4.31-4.26 (m, 1H, 9-H), 3.66-3.58 (m, 1H, 17-H), 3.54-3.52 (m, 1H, 5''-H), 3.54 (s, 3H, OMe), 3.49 (s, 3H, OMe), 3.48 (s, 3H, OMe), 3.48-3.42 (m, 4H, 4-H, 2'-H, 3'-H, 5'-H), 3.31-3.25 (m, 1H, 16-H), 3.12-3.07 (m, 2H, 2-H, 3-H, 4'-H), 3.01-2.96 (m, 1H, 3-H), 2.89-2.82 (m, 1H, 12-H), 2.44-2.10 (m, 9H, 2-H, 7-H, 10-H, NCH<sub>3</sub>), 2.04-1.86 (m, 4H, 8-H, 2''-H, 3''-H, 4''-H), 1.84-1.74 (m, 1H, 19-H), 1.66-1.10 (m, 18H, 8-H, 10-H, 16-CH<sub>3</sub>, 18-H, 19-H, 20-H, 22-H, 6'-H, 2''-H, 3''-H, 6''-H), 0.94-0.78 (m, 4H, 11-H, 23-H). The  $\alpha$ -anomer of **1**: <sup>1</sup>H NMR (CDCl<sub>3</sub>, 400 MHz)  $\delta$  6.78 (s, 1H, 13-H), 5.86 (d,  $J$  = 10 Hz, 1H, 6-H), 5.76 (dt,  $J$  = 9.6, 2.8 Hz, 1H, 5-H), 4.84 (d,  $J$  = 1.8 Hz, 1H, 1'-H), 4.68-4.62 (m, 1H, 21-H), 4.39-4.26 (m, 2H, 1''-H, 9-H), 3.86-3.80 (m, 1H, 17-H), 3.55 (s, 3H, OMe), 3.54-3.52 (m, 1H, 5''-H), 3.49 (s, 3H, OMe), 3.48 (s, 3H, OMe), 3.48-3.42 (m, 4H, 4-H, 2'-H, 3'-H, 5'-H), 3.36-3.30 (m, 1H, 16-H), 3.13-2.98 (m, 3H, 2-H, 3-H, 4'-H), 2.91-2.84 (m, 1H, 12-H), 2.44-2.10 (m, 9H, 2-H, 7-H, 10-H, NCH<sub>3</sub>), 2.04-1.86 (m, 4H, 8-H, 2''-H, 3''-H, 4''-H), 1.84-1.74 (m, 1H, 19-H), 1.66-1.10 (m, 18H, 8-H, 10-H, 16-CH<sub>3</sub>, 18-H, 19-H, 20-H, 22-H, 6'-H, 2''-H, 3''-H, 6''-H), 0.94-0.78 (m, 4H, 11-H, 23-H).

## VI. References

- (1) Kim, H. J.; Pongdee, R.; Wu, Q.; Hong, L.; Liu, H.-W. *J. Am. Chem. Soc.* **2007**, *129*, 14582.
- (2) Kim, H. J.; Ruszczycky, M. W.; Choi, S.-H.; Liu, Y.-N.; Liu, H.-W. *Nature* **2011**, *473*, 109.
- (3) Isiorho, E. A.; Liu, H.-W.; Keatinge-Clay, A. T. *Biochemistry* **2012**, *51*, 1213.
- (4) Kim, H. J.; White-Phillip, J. A.; Ogasawara, Y.; Shin, N.; Isiorho, E. A.; Liu, H.-W. *J. Am. Chem. Soc.* **2010**, *132*, 2901.
- (5) Molander, G. A.; McWilliams, J. C.; Noll, B. C. *J. Am. Chem. Soc.* **1997**, *119*, 1265.
- (6) Sullivan, G. R.; Dale, J. A.; Mosher, H. S. *J. Org. Chem.* **1973**, *38*, 2143.
- (7) Rychnovsky, S. D.; Rogers, B. N.; Richardson, T. I. *Acc. Chem. Res.* **1998**, *31*, 9.
- (8) Jung, M. E.; Light, L. A. *Tet. Lett.* **1982**, *23*, 3851.
- (9) Creemer, L. C.; Kirst, H. A.; Paschal, J. W. *J. Antibiot.* **1998**, *51*, 795.
- (10) Evans, D. A.; Black, W. C. *J. Am. Chem. Soc.* **1993**, *115*, 4497.
- (11) Paquette, L. A.; Collado, I.; Purdie, M. *J. Am. Chem. Soc.* **1998**, *120*, 2553.



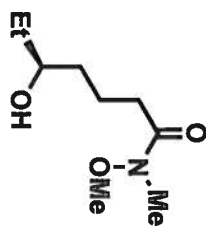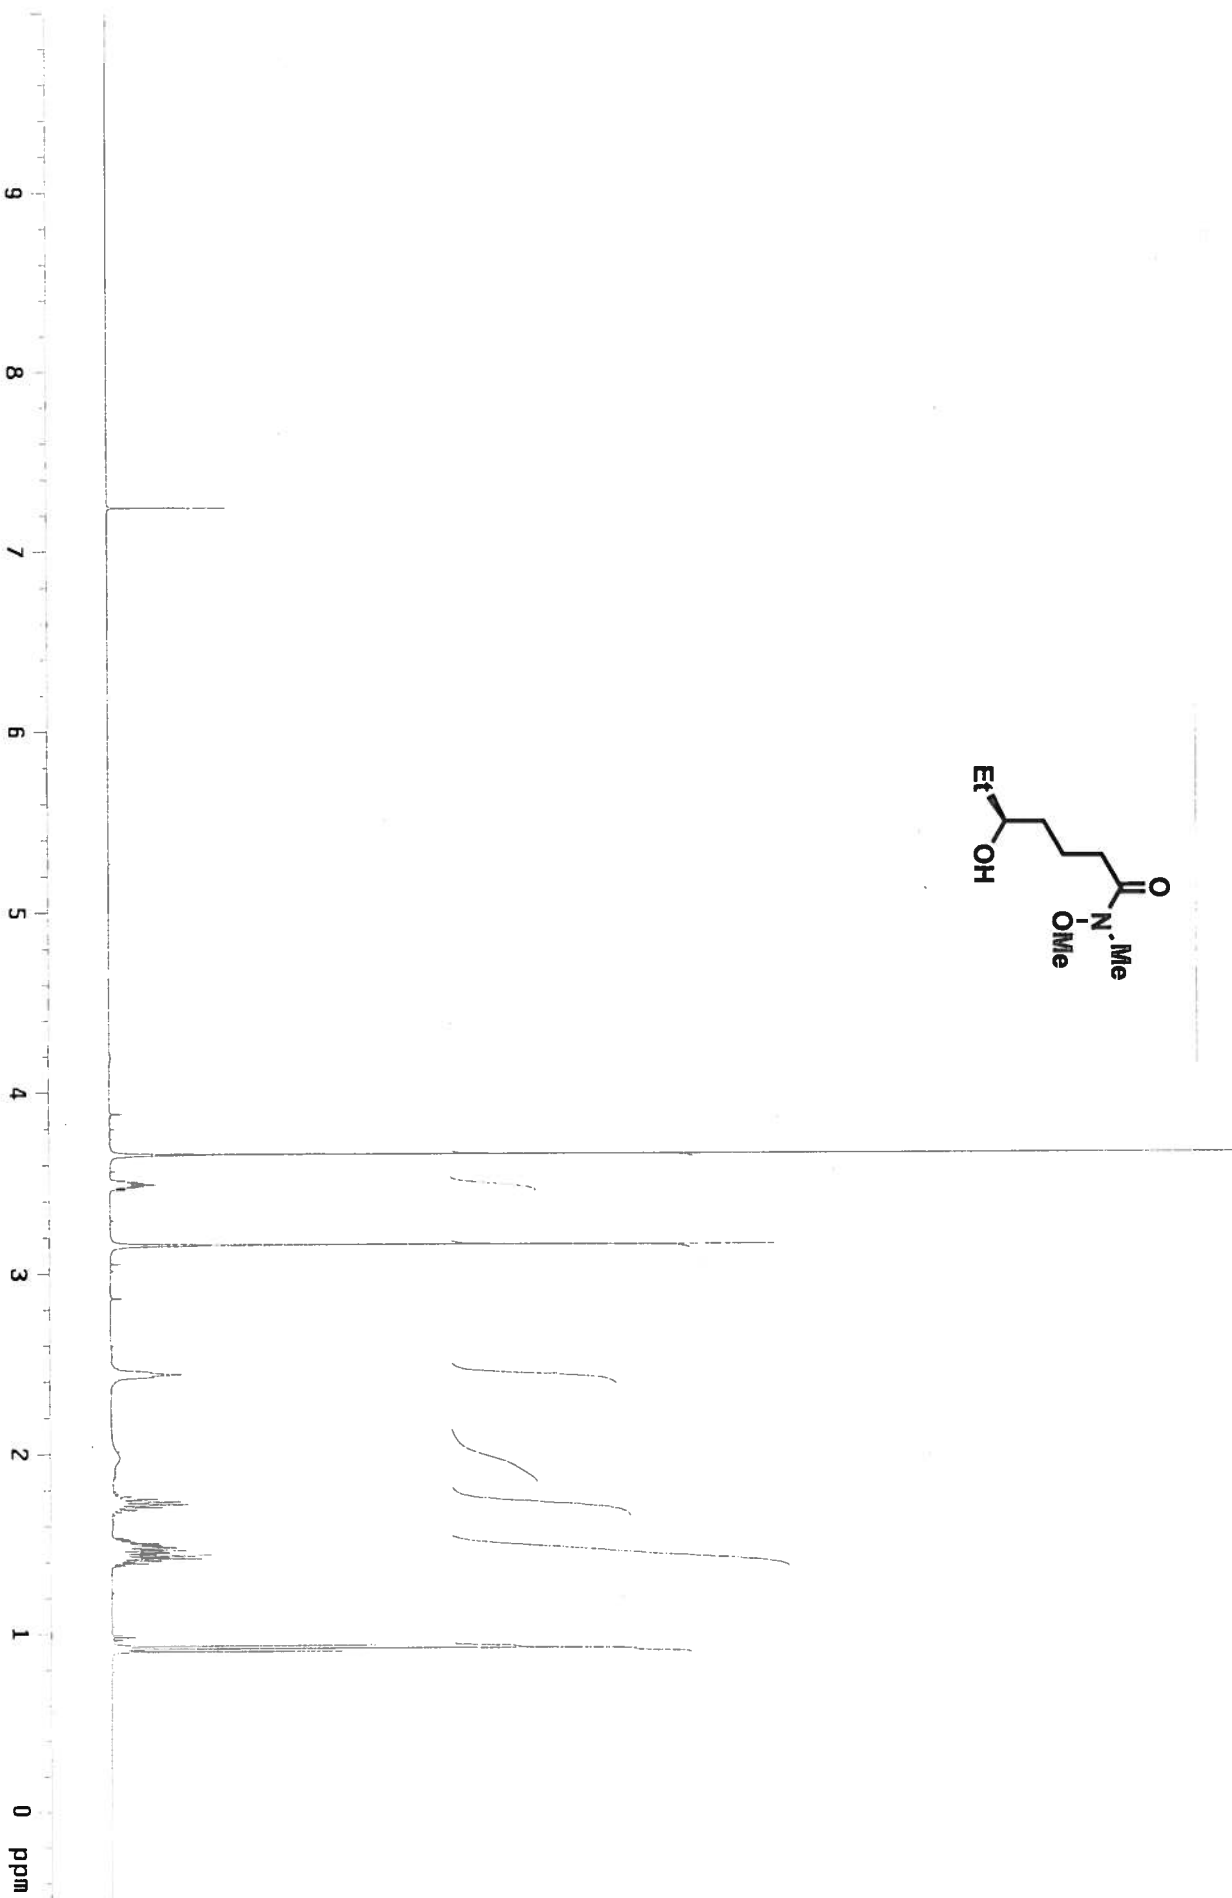

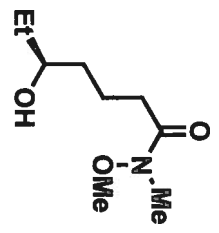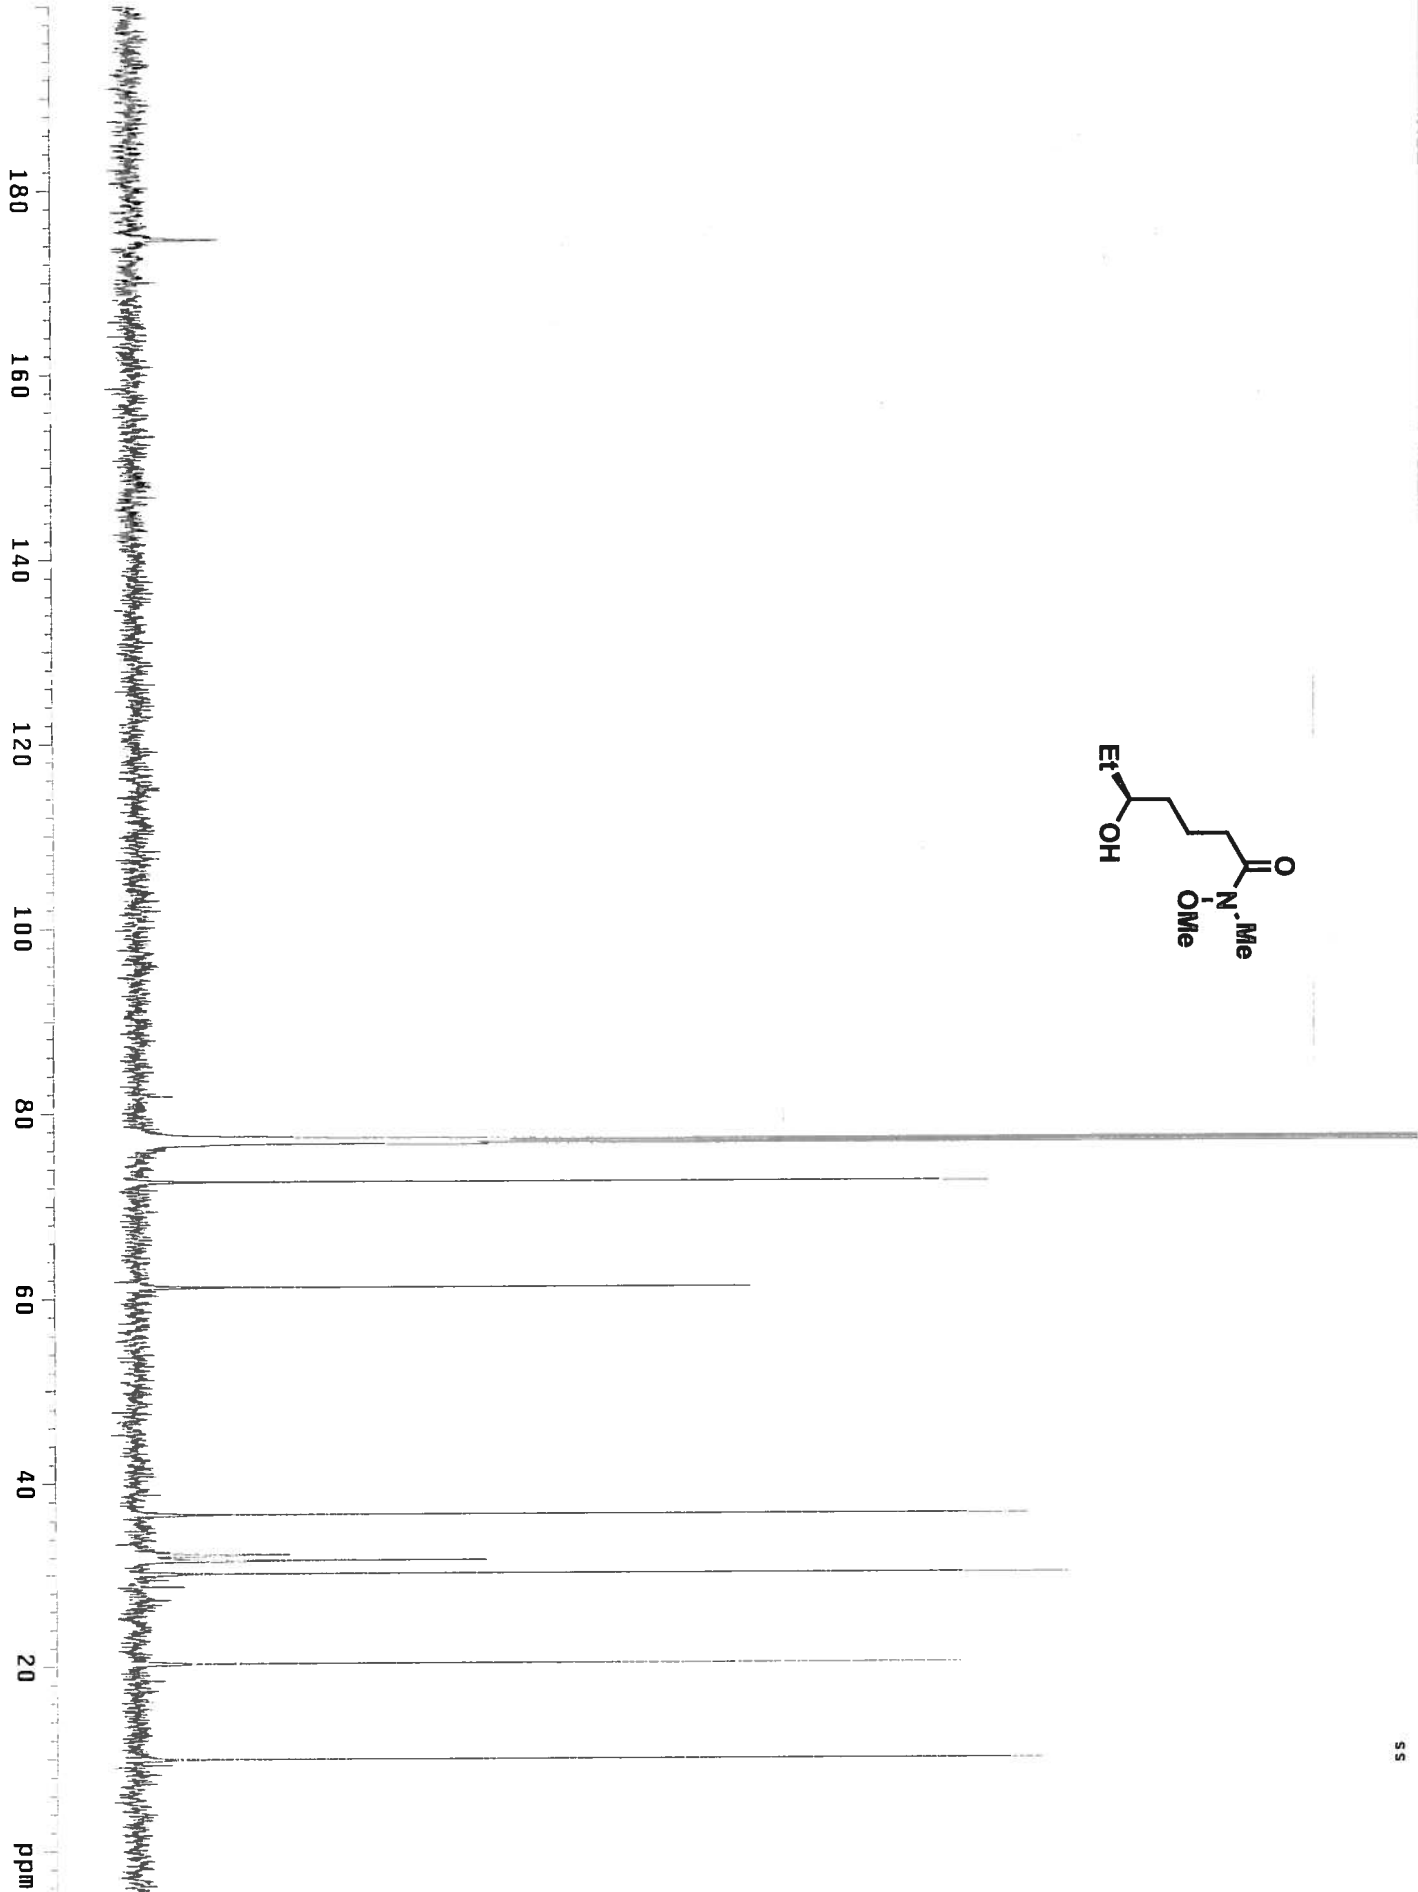

Elemental Composition

Date : 23-JAN-2004

File:LIU8932 Ident:7\_9 SMO(1,5) BSUB(128,15,-3.0)  
 ZAB-E4F CI+ Voltage BpI:2349312 TIC:43217808 Flags:NORM DEL ERR  
 File Text:I-RP-31  
 Heteroatom Max: 50 Ion: Both Even and Odd  
 Limits:

| Mass       | mDa  | PPM  | Calc. Mass | DBE  | C   | H   | N | O |
|------------|------|------|------------|------|-----|-----|---|---|
| 190.144713 | 5.5  |      |            | -0.5 | 0   | 0   | 1 | 0 |
|            |      |      |            | 50.0 | 200 | 400 | 1 | 6 |
| 190.144713 | -0.4 | -2.1 | 190.144319 | 0.5  | 9   | 20  | 1 | 3 |

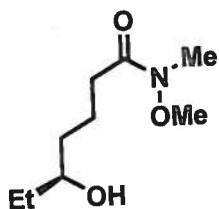

C<sub>9</sub>H<sub>19</sub>N<sub>1</sub>O<sub>2</sub>  
 189.1445

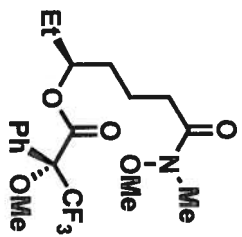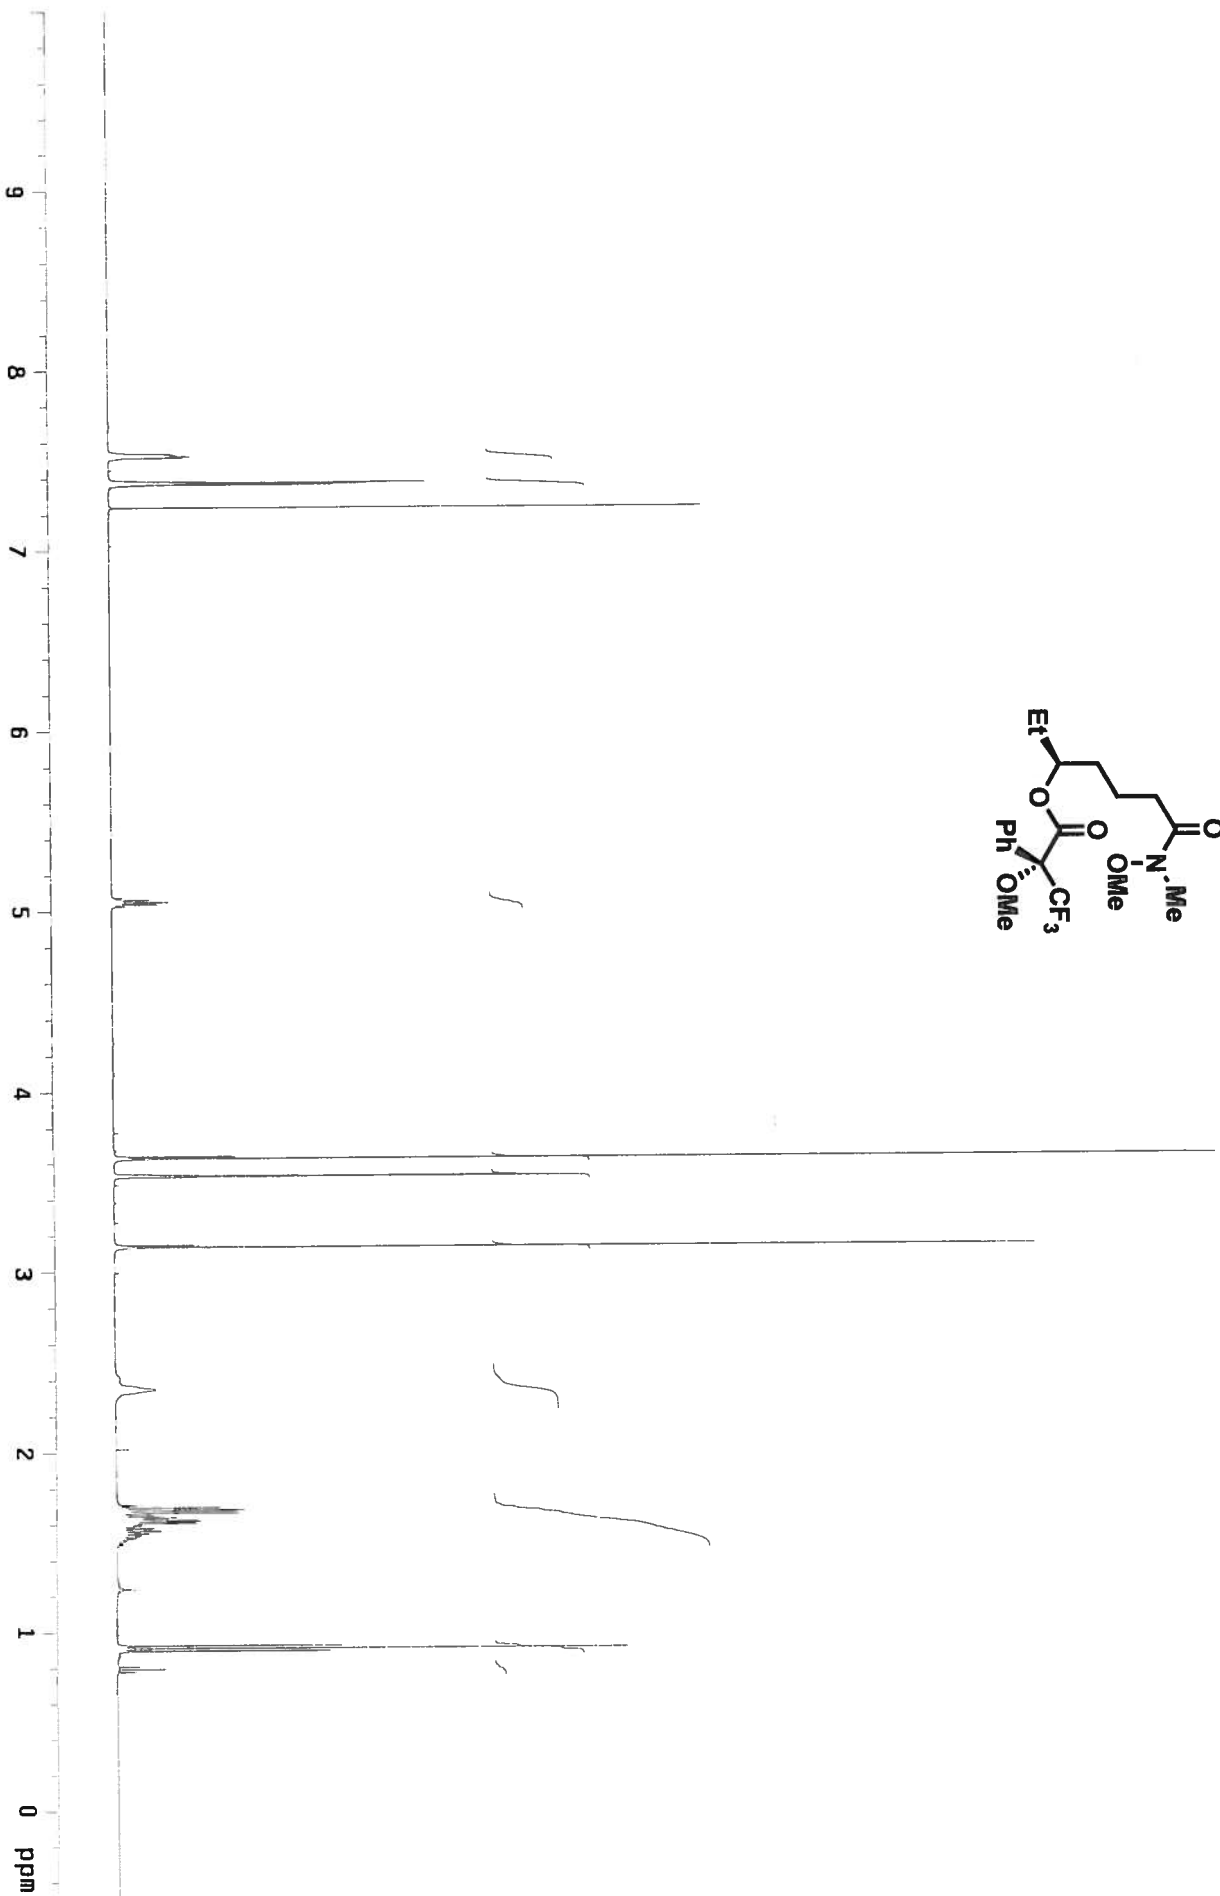

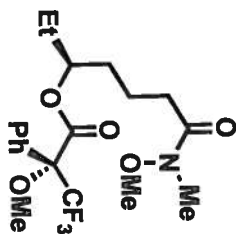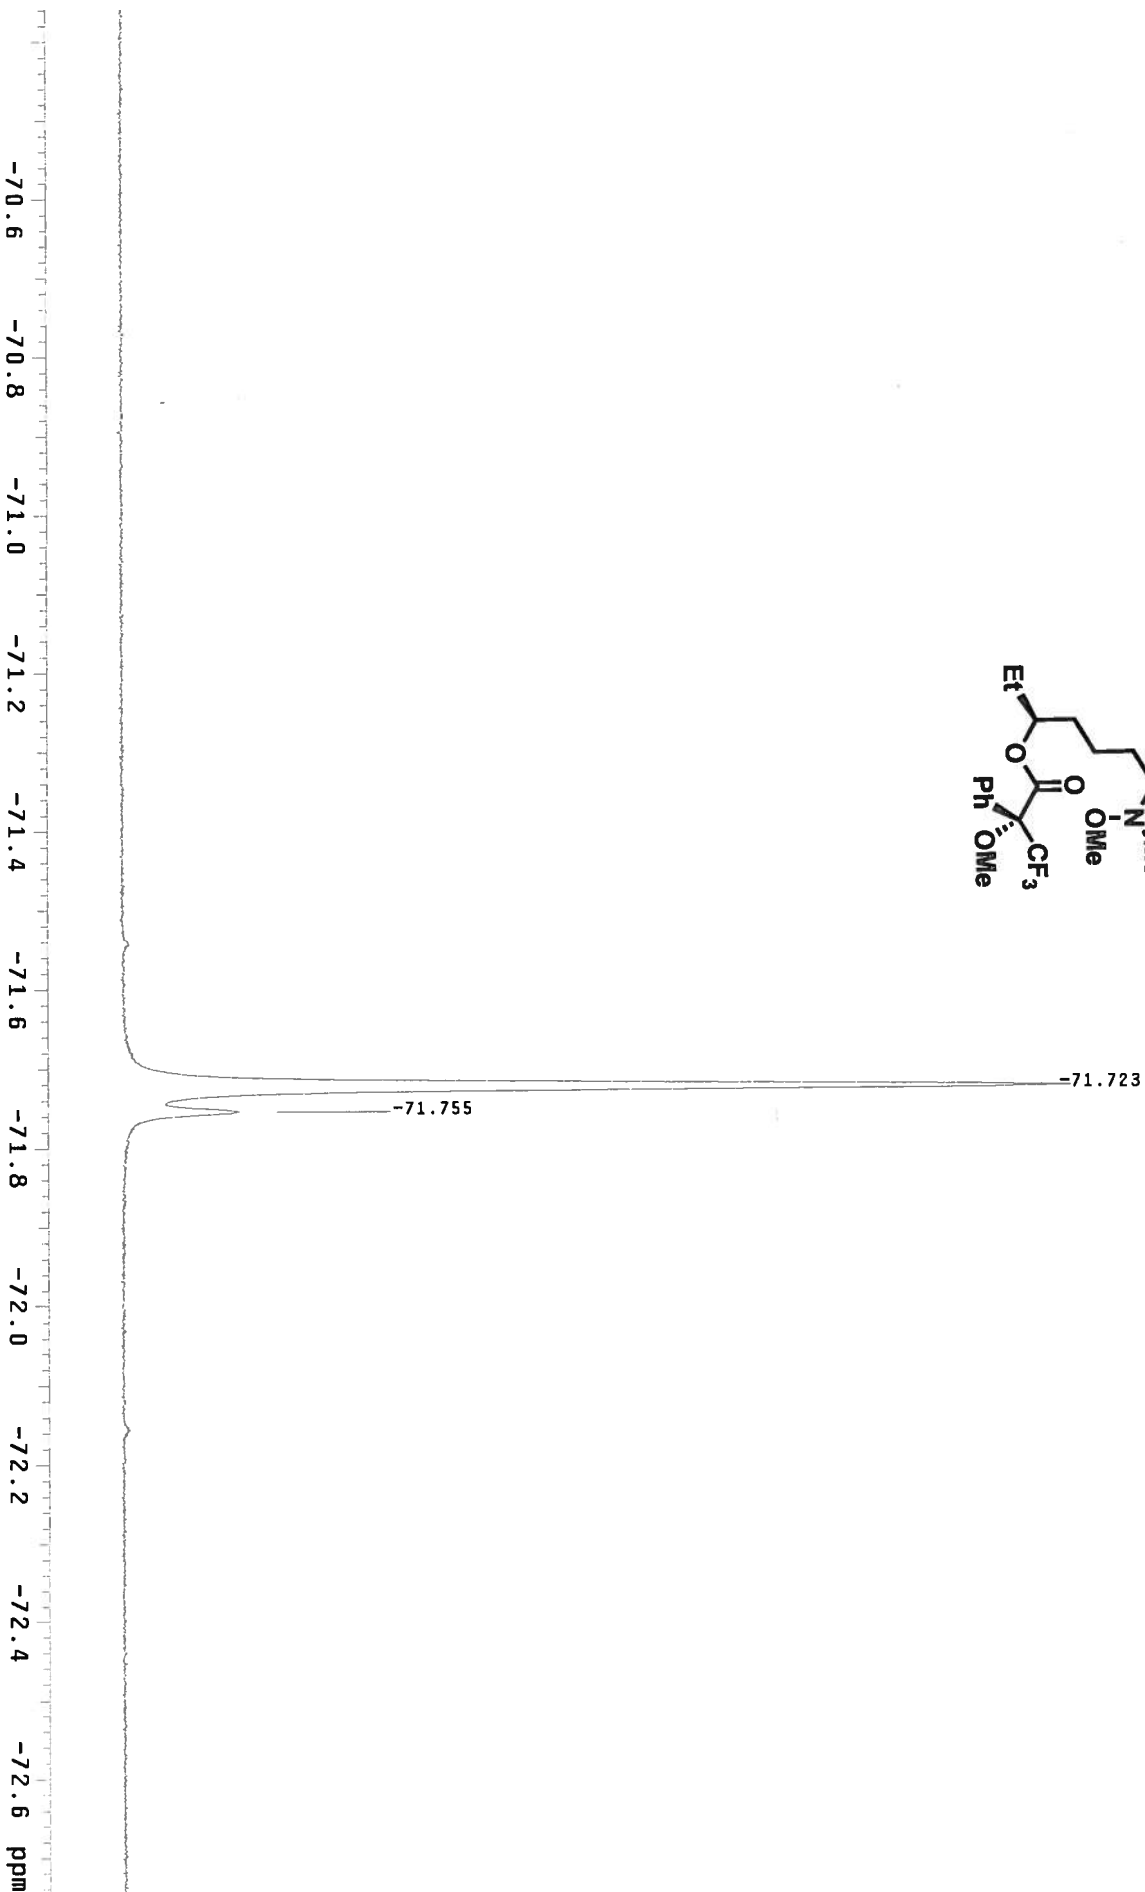

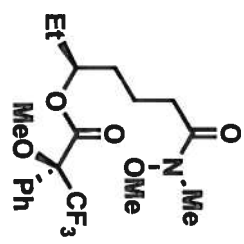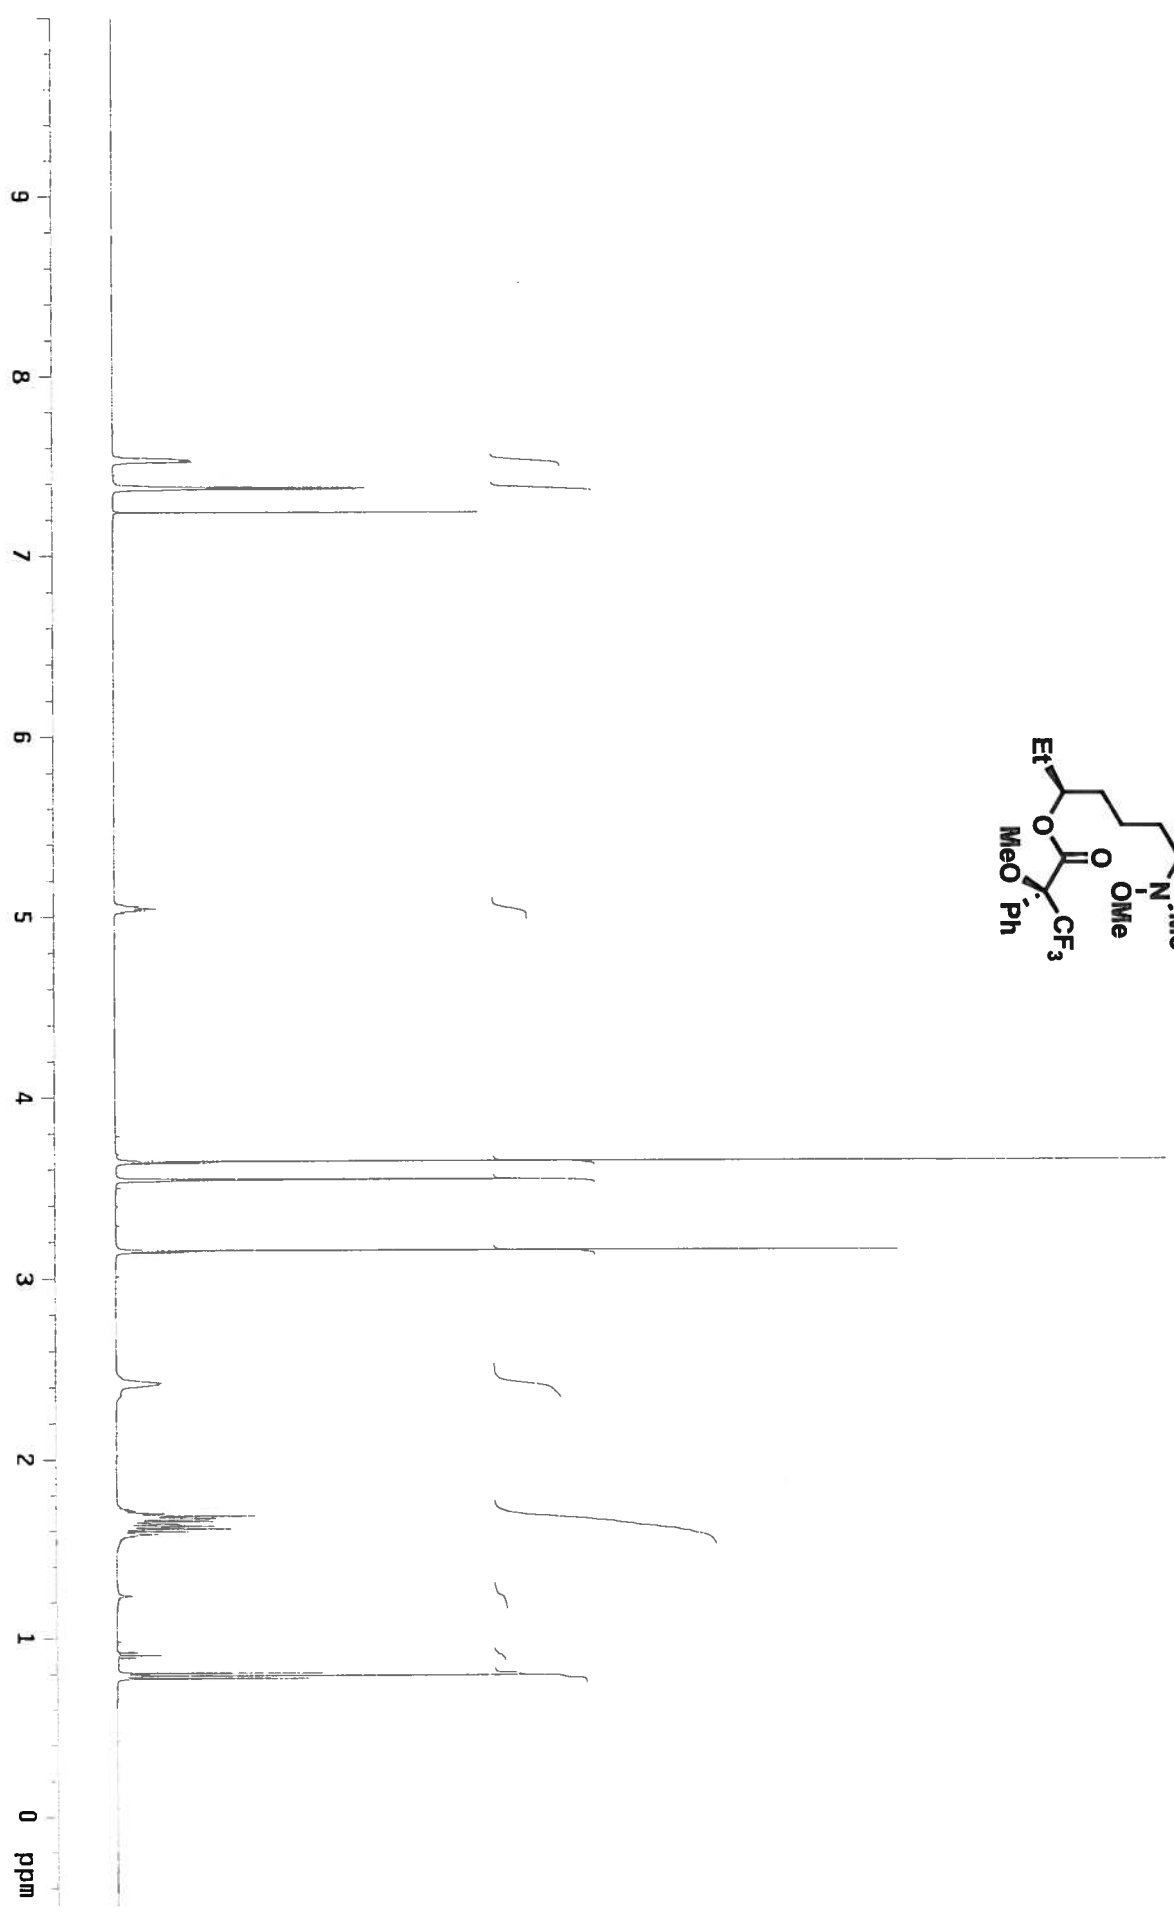

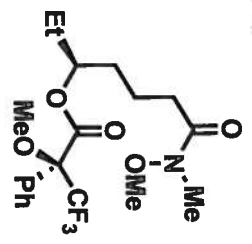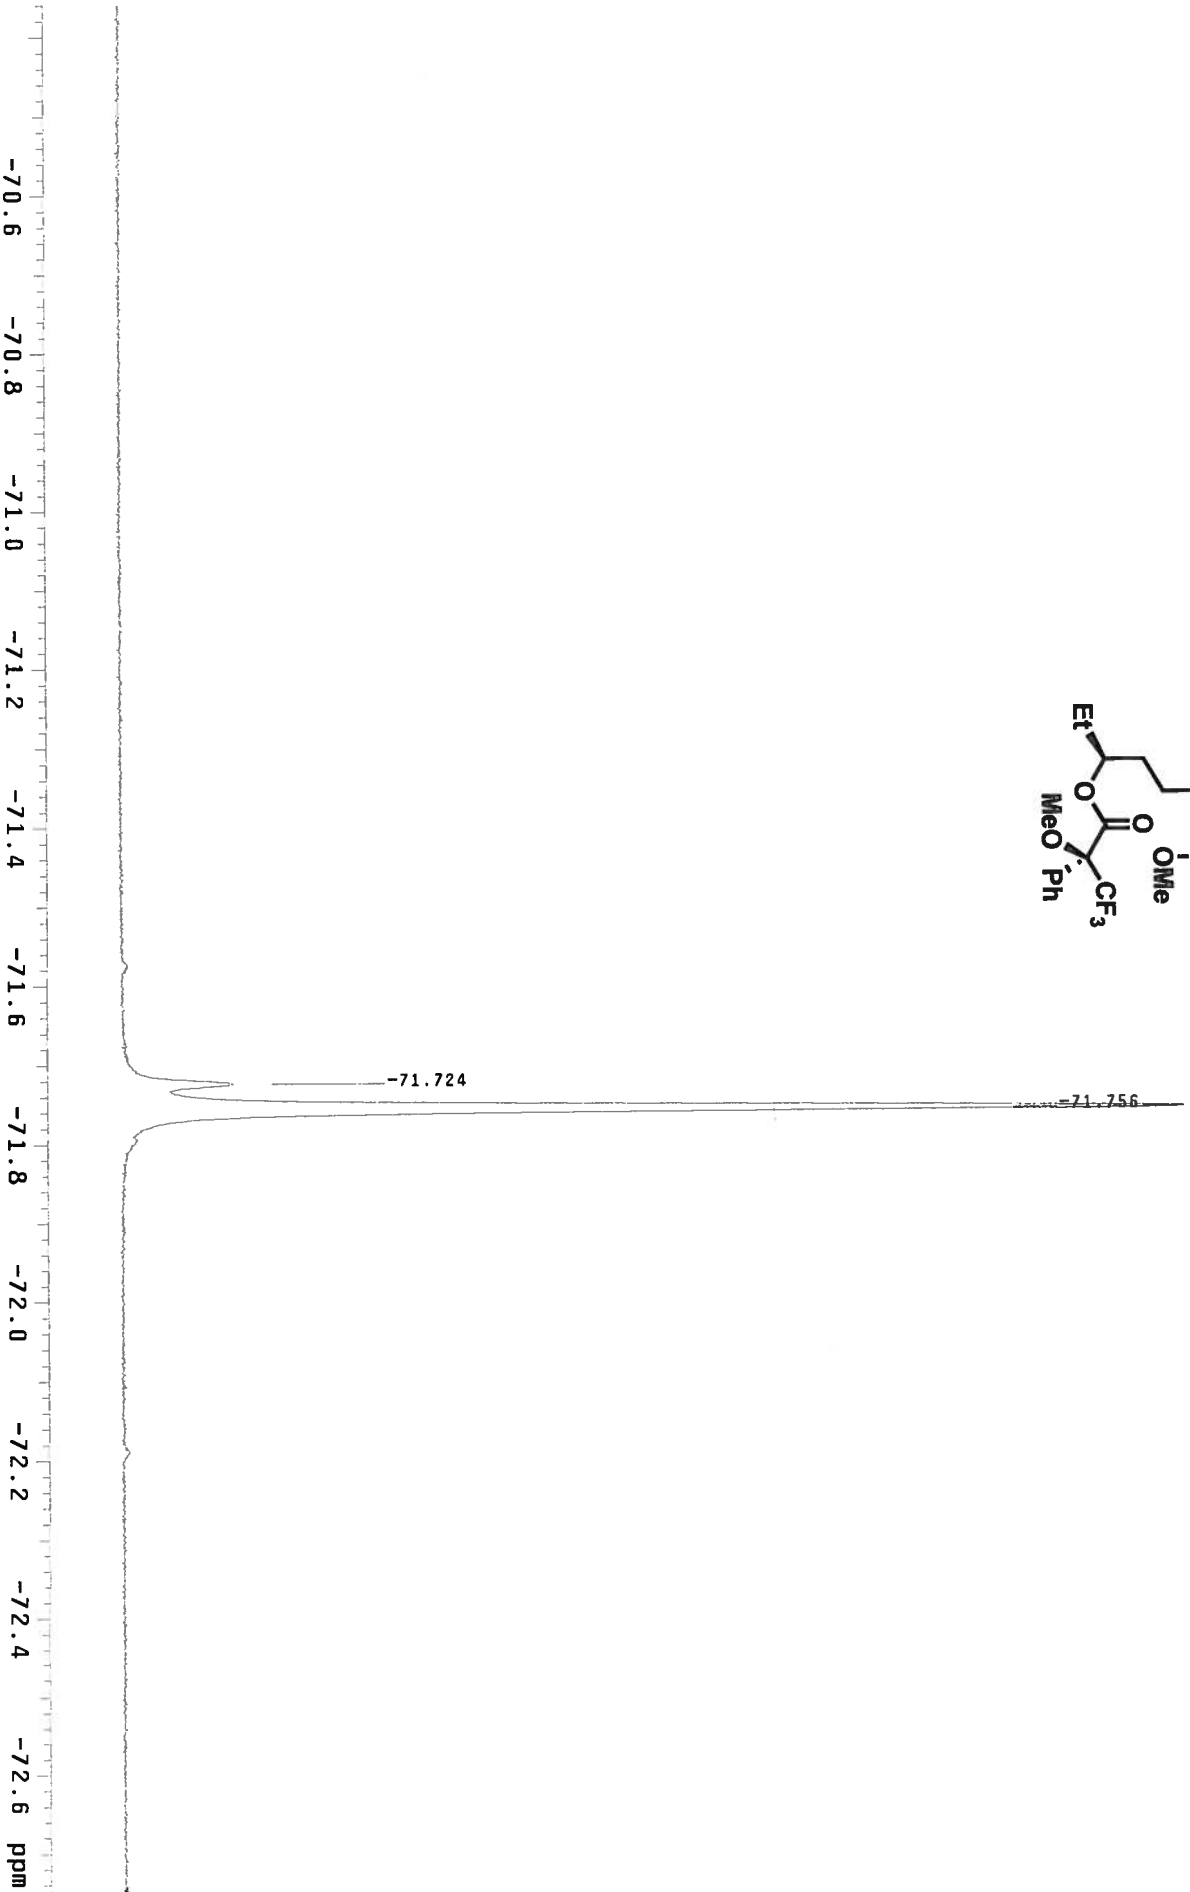

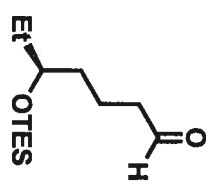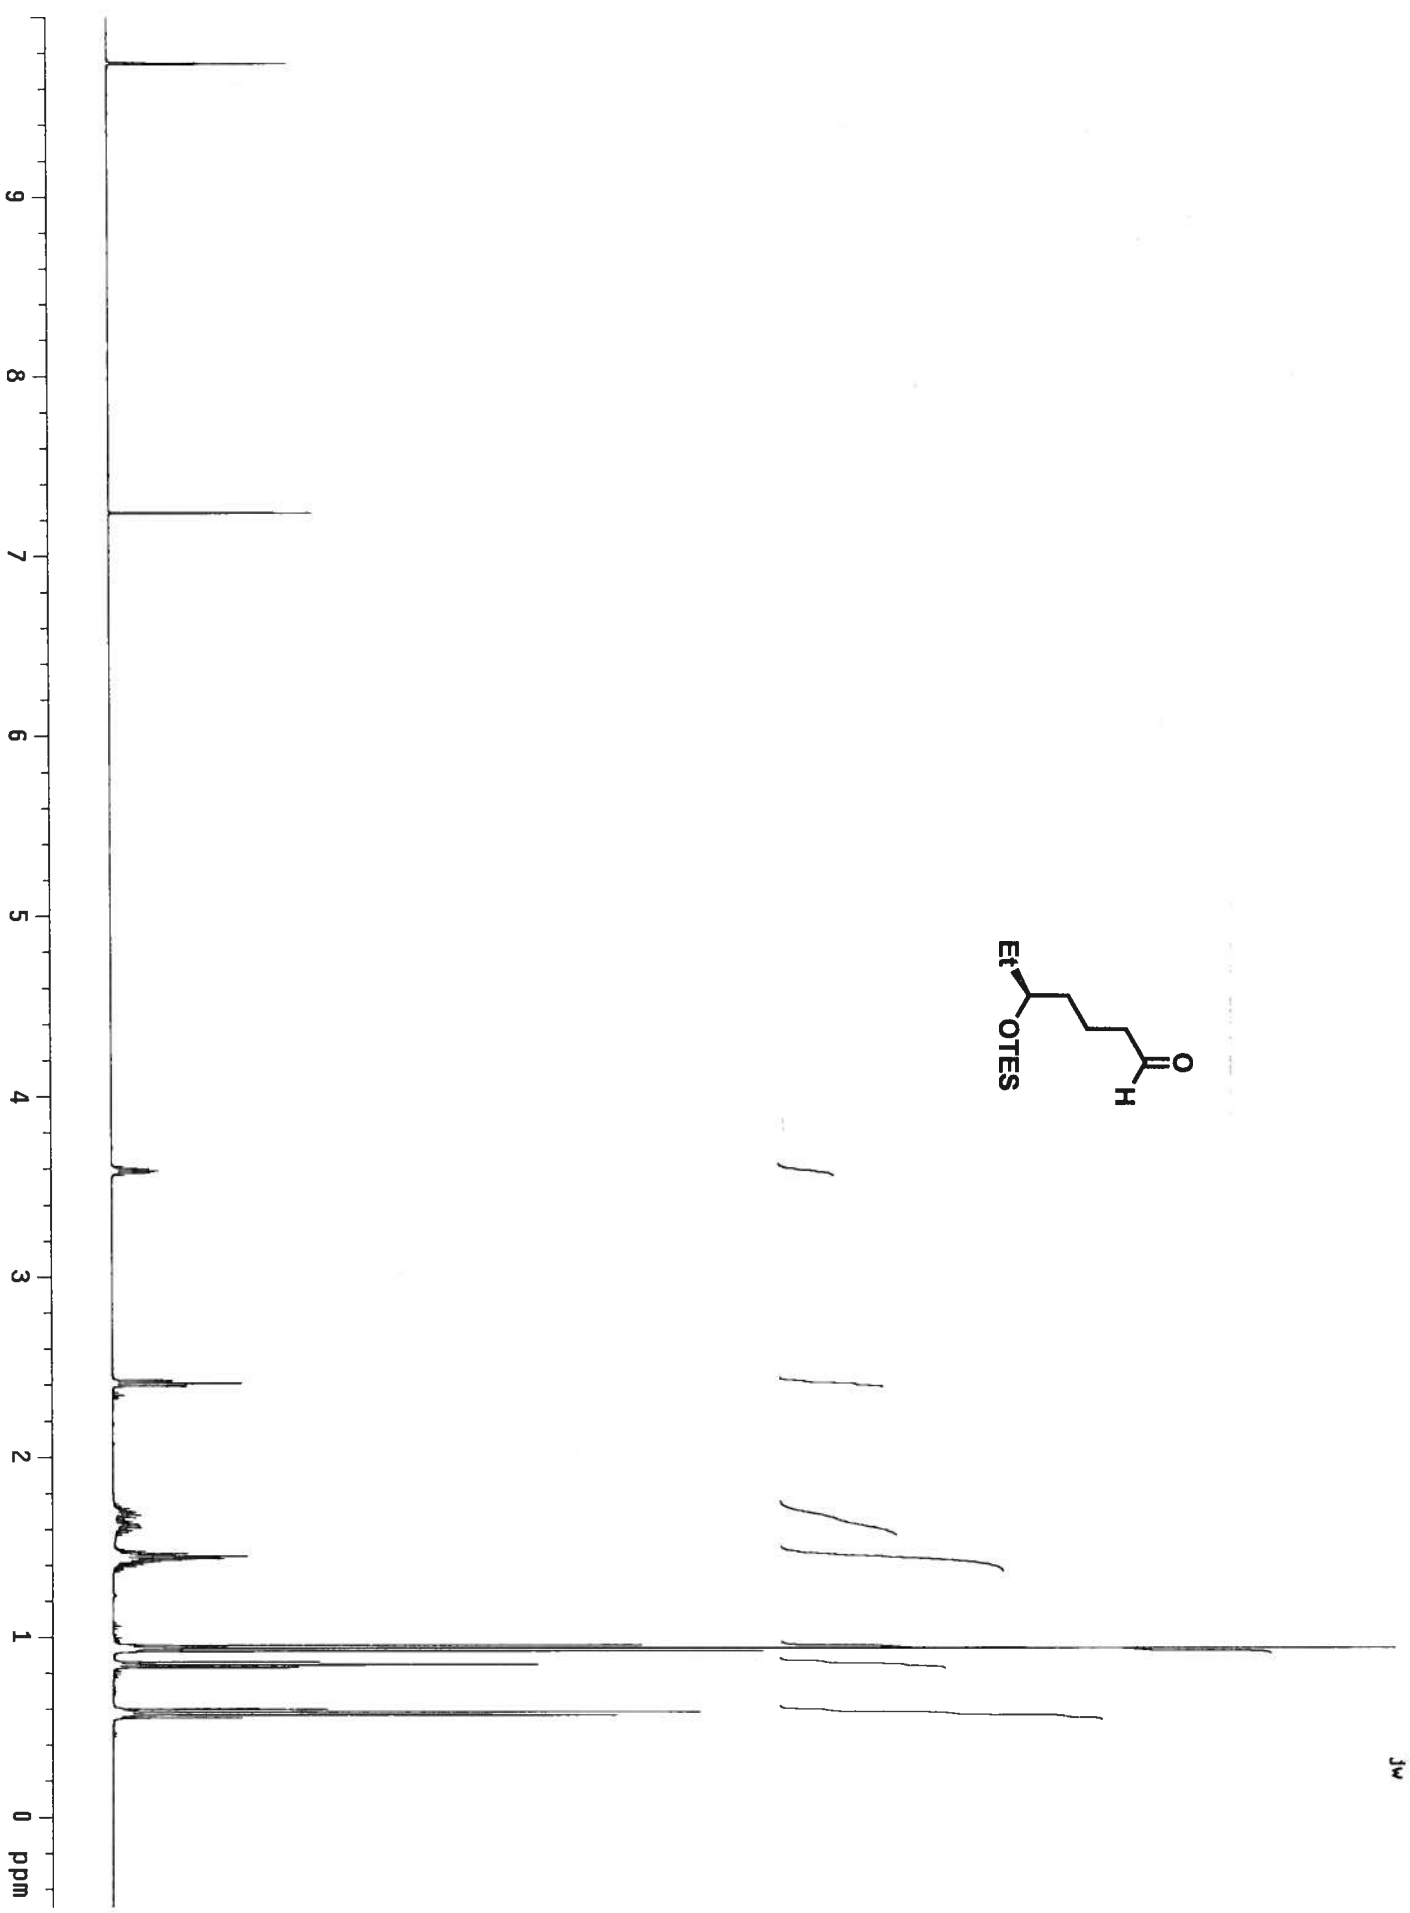



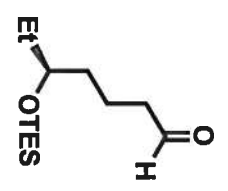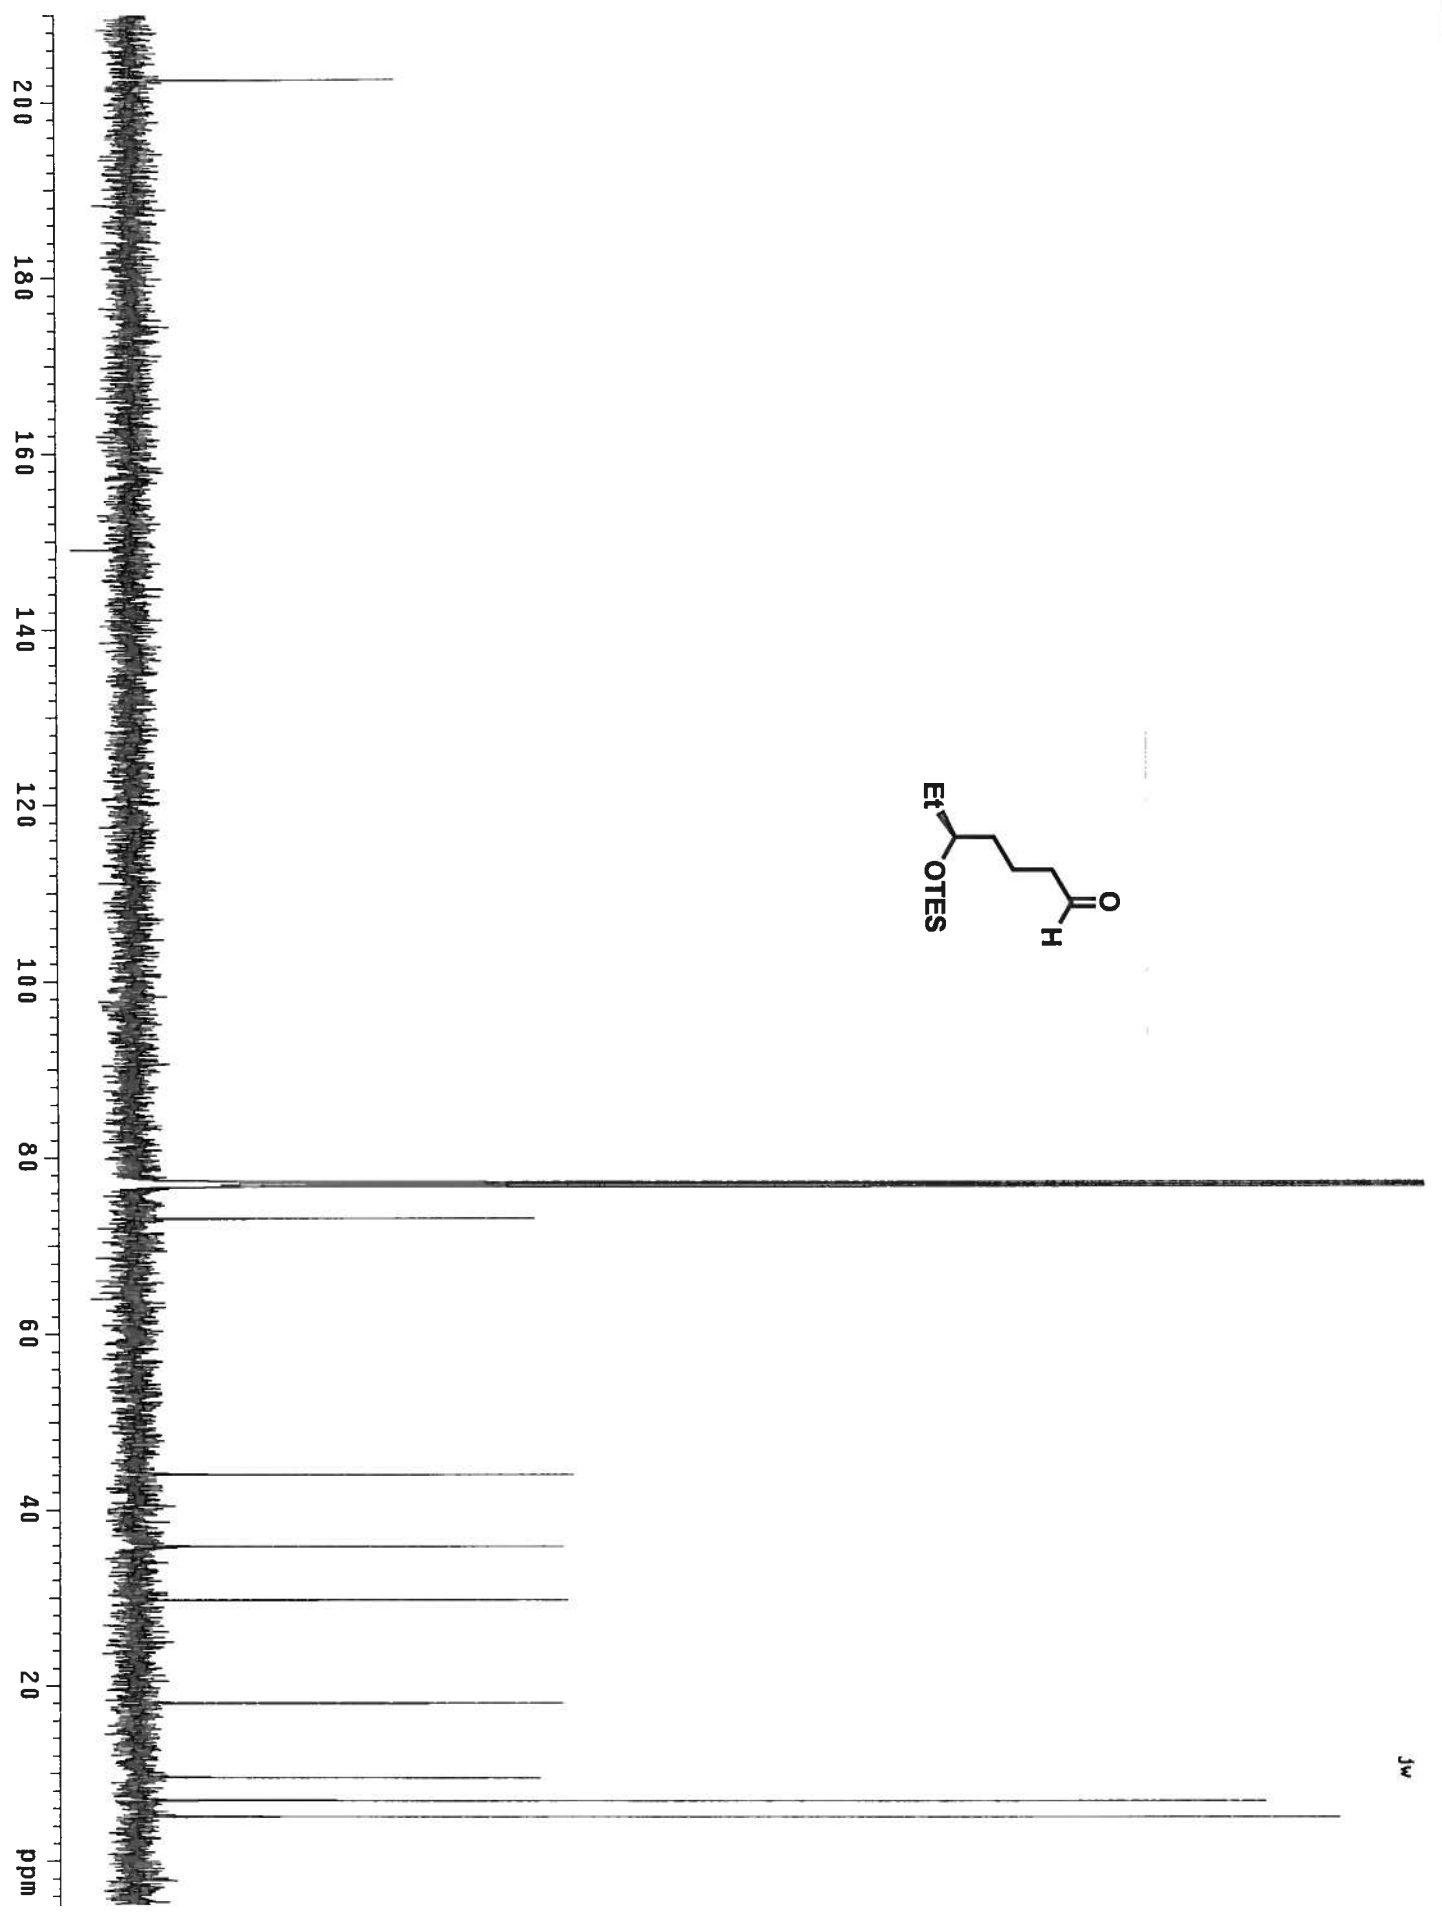

Elemental Composition

Date : 23-JAN-2004

File:LIU8930 Ident:9\_10 SMO(1,5) BSUB(128,15,-3.0)  
ZAB-E4F CI+ Voltage BpI:343872 TIC:10107969 Flags:NORM DEL ERR  
File Text:I-RP-42

Heteroatom Max: 50 Ion: Both Even and Odd  
Limits:

|             |            |            |                   |            |          |          |          |           |
|-------------|------------|------------|-------------------|------------|----------|----------|----------|-----------|
| 245.192532  |            | 5.5        |                   | -0.5       | 0        | 0        | 0        | 1         |
|             |            |            |                   | 50.0       | 200      | 400      | 6        | 1         |
| <b>Mass</b> | <b>mDa</b> | <b>PPM</b> | <b>Calc. Mass</b> | <b>DBE</b> | <b>C</b> | <b>H</b> | <b>O</b> | <b>Si</b> |
| 245.192532  | 1.2        | 4.7        | 245.193684        | 0.5        | 13       | 29       | 2        | 1         |

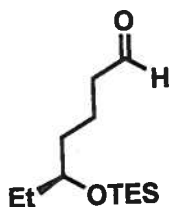

*Handwritten notes:*  
245.192532  
245.193684

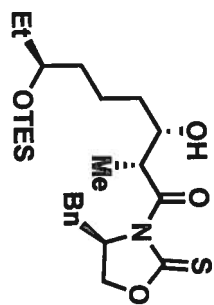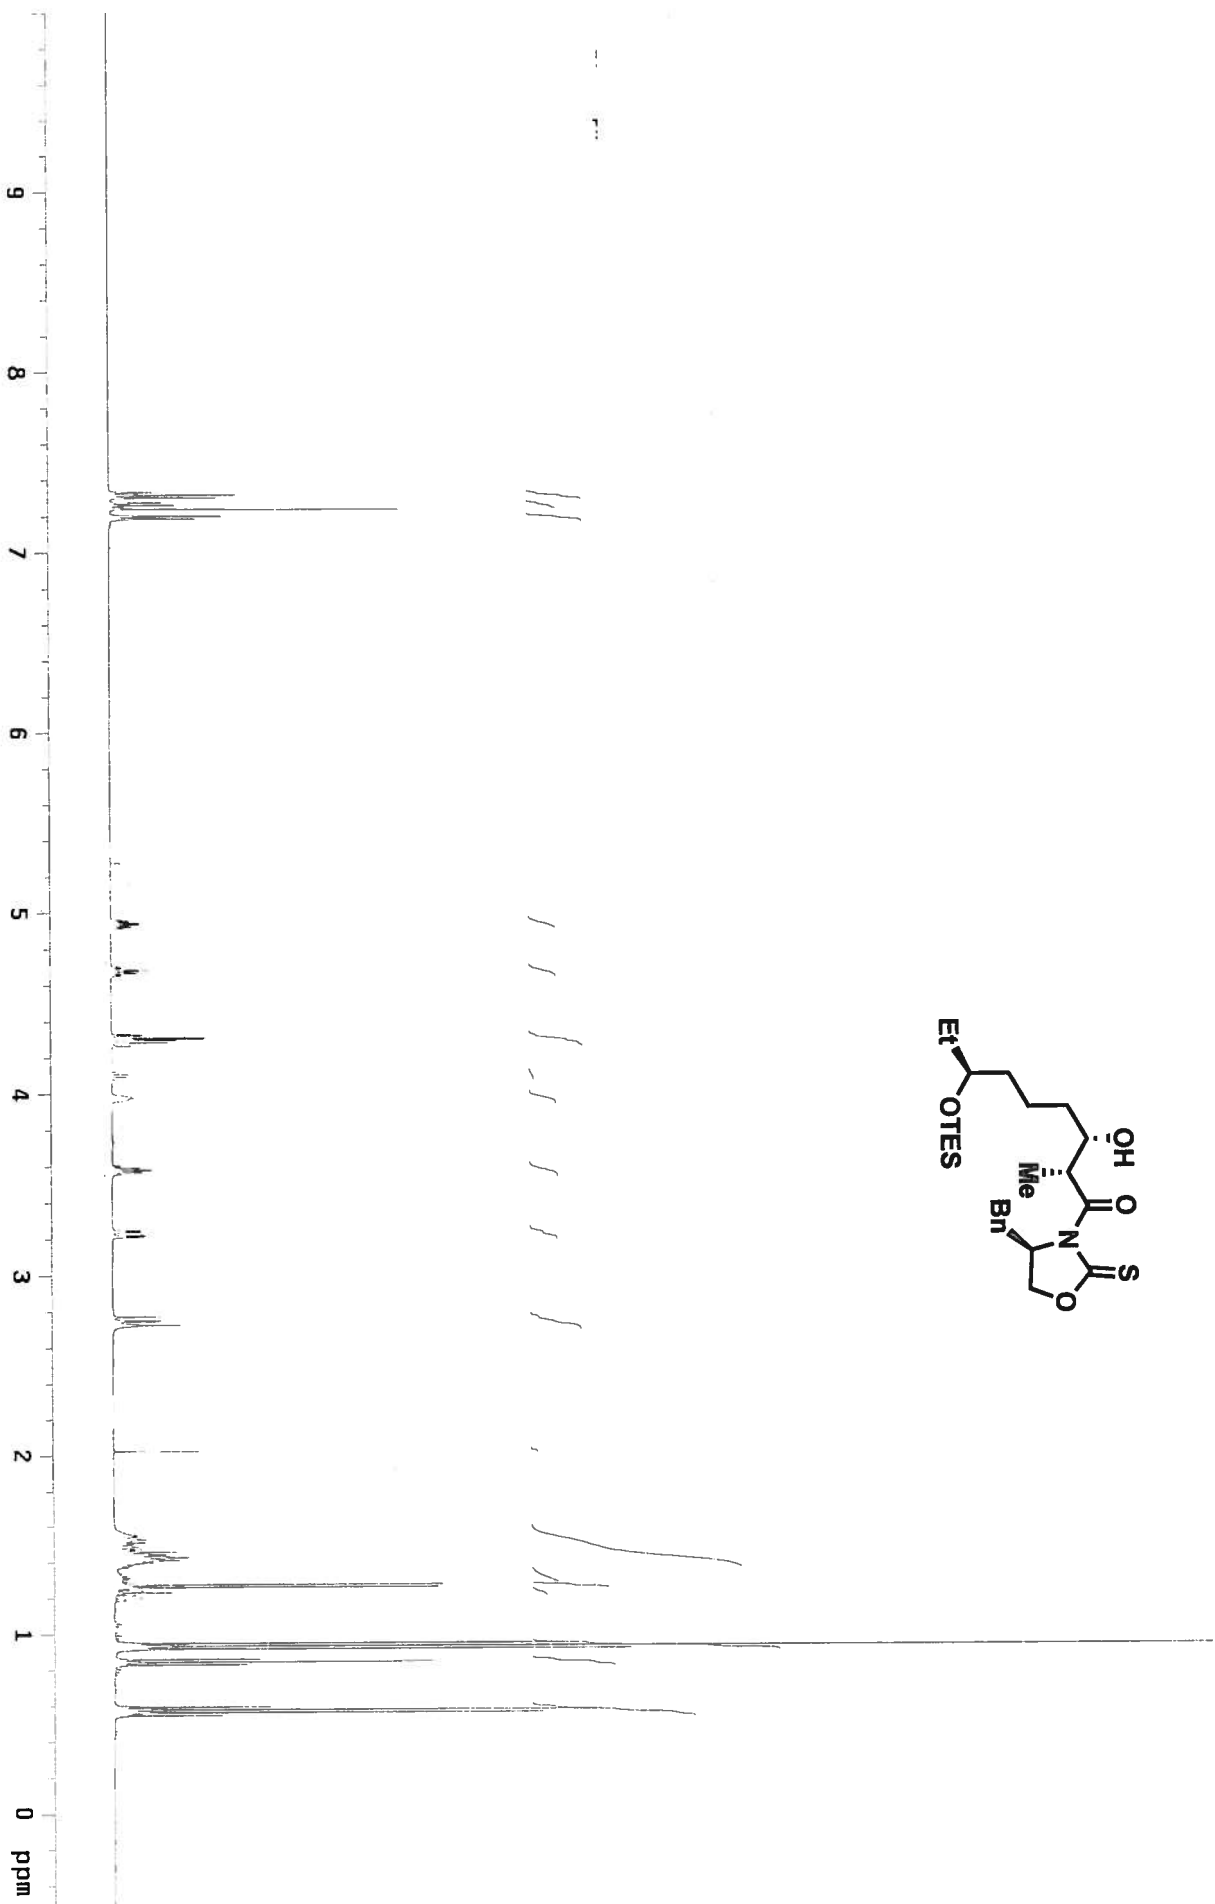

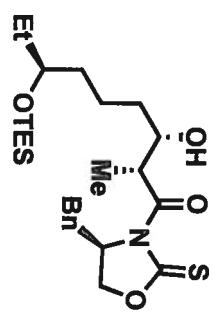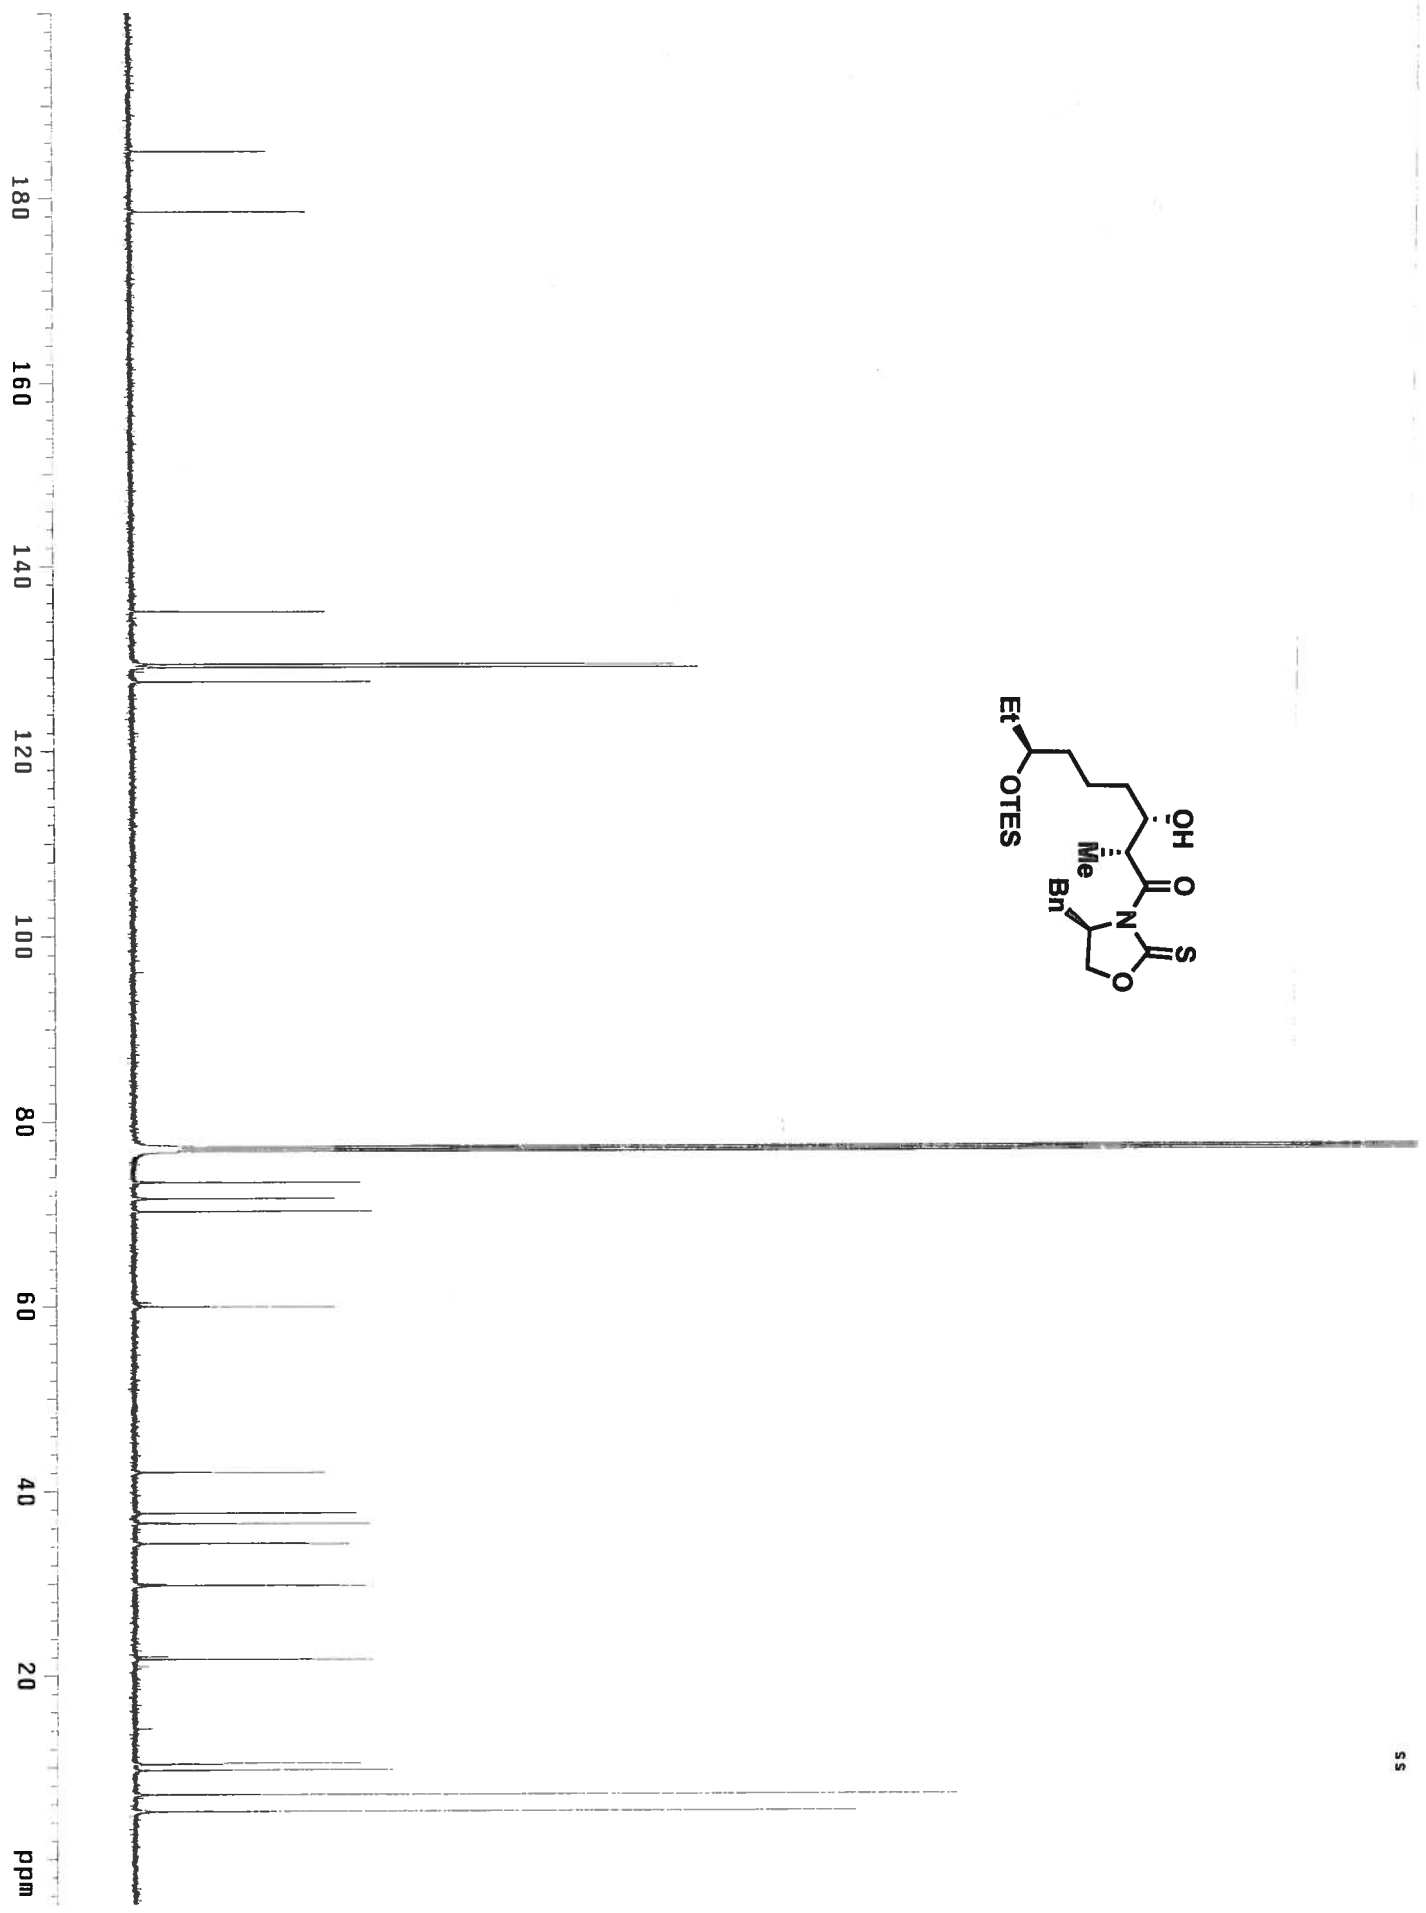

Elemental Composition

Date : 11-FEB-2004

File:LIU9899 Ident:59\_62 SMO(1,5) BSUB(128,15,-3.0)  
 ZAB-E4F CI+ Voltage BpI:771136 TIC:20242570 Flags:NORM  
 File Text:I-RP-62

Heteroatom Max: 20 Ion: Both Even and Odd  
 Limits:

|             |            |            |                   |            |          |          |          |          |           |          |
|-------------|------------|------------|-------------------|------------|----------|----------|----------|----------|-----------|----------|
| 494.278426  | 5.0        |            |                   | -0.5       | 0        | 0        | 1        | 0        | 1         | 1        |
|             |            |            |                   | 20.0       | 200      | 400      | 1        | 8        | 1         | 1        |
| <b>Mass</b> | <b>mDa</b> | <b>PPM</b> | <b>Calc. Mass</b> | <b>DBE</b> | <b>C</b> | <b>H</b> | <b>N</b> | <b>O</b> | <b>Si</b> | <b>S</b> |
| 494.278426  | -2.4       | -4.8       | 494.276035        | 6.5        | 26       | 44       | 1        | 4        | 1         | 1        |

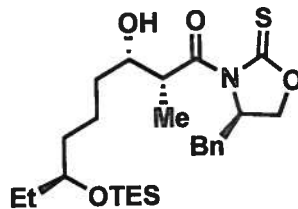

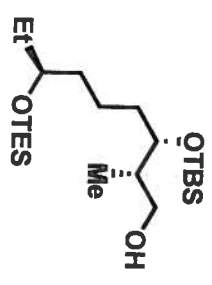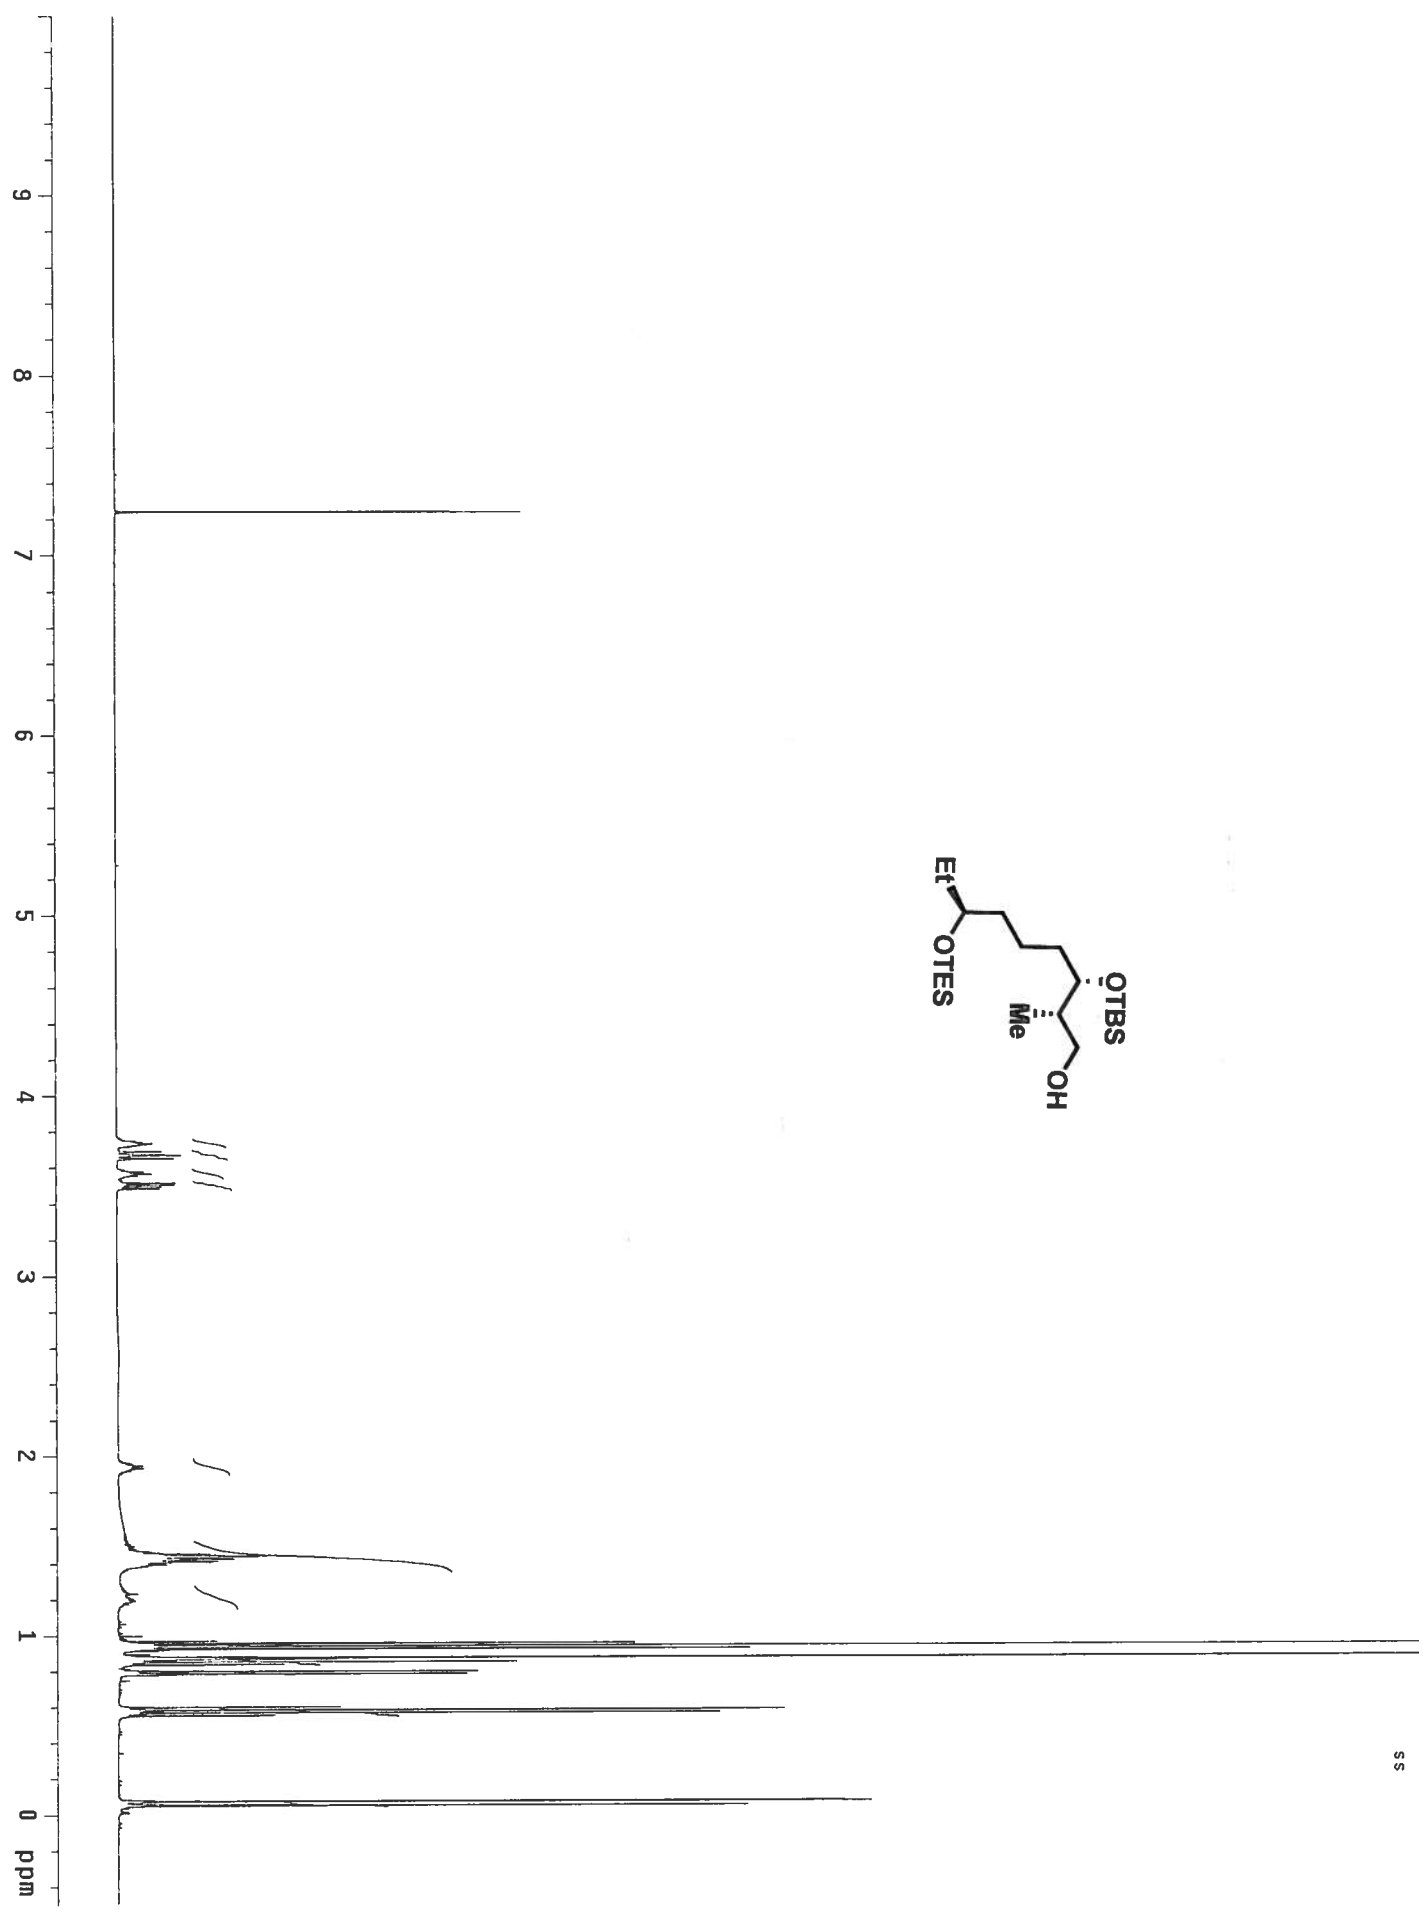

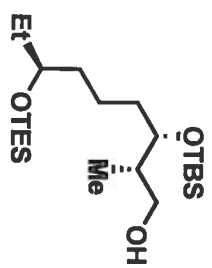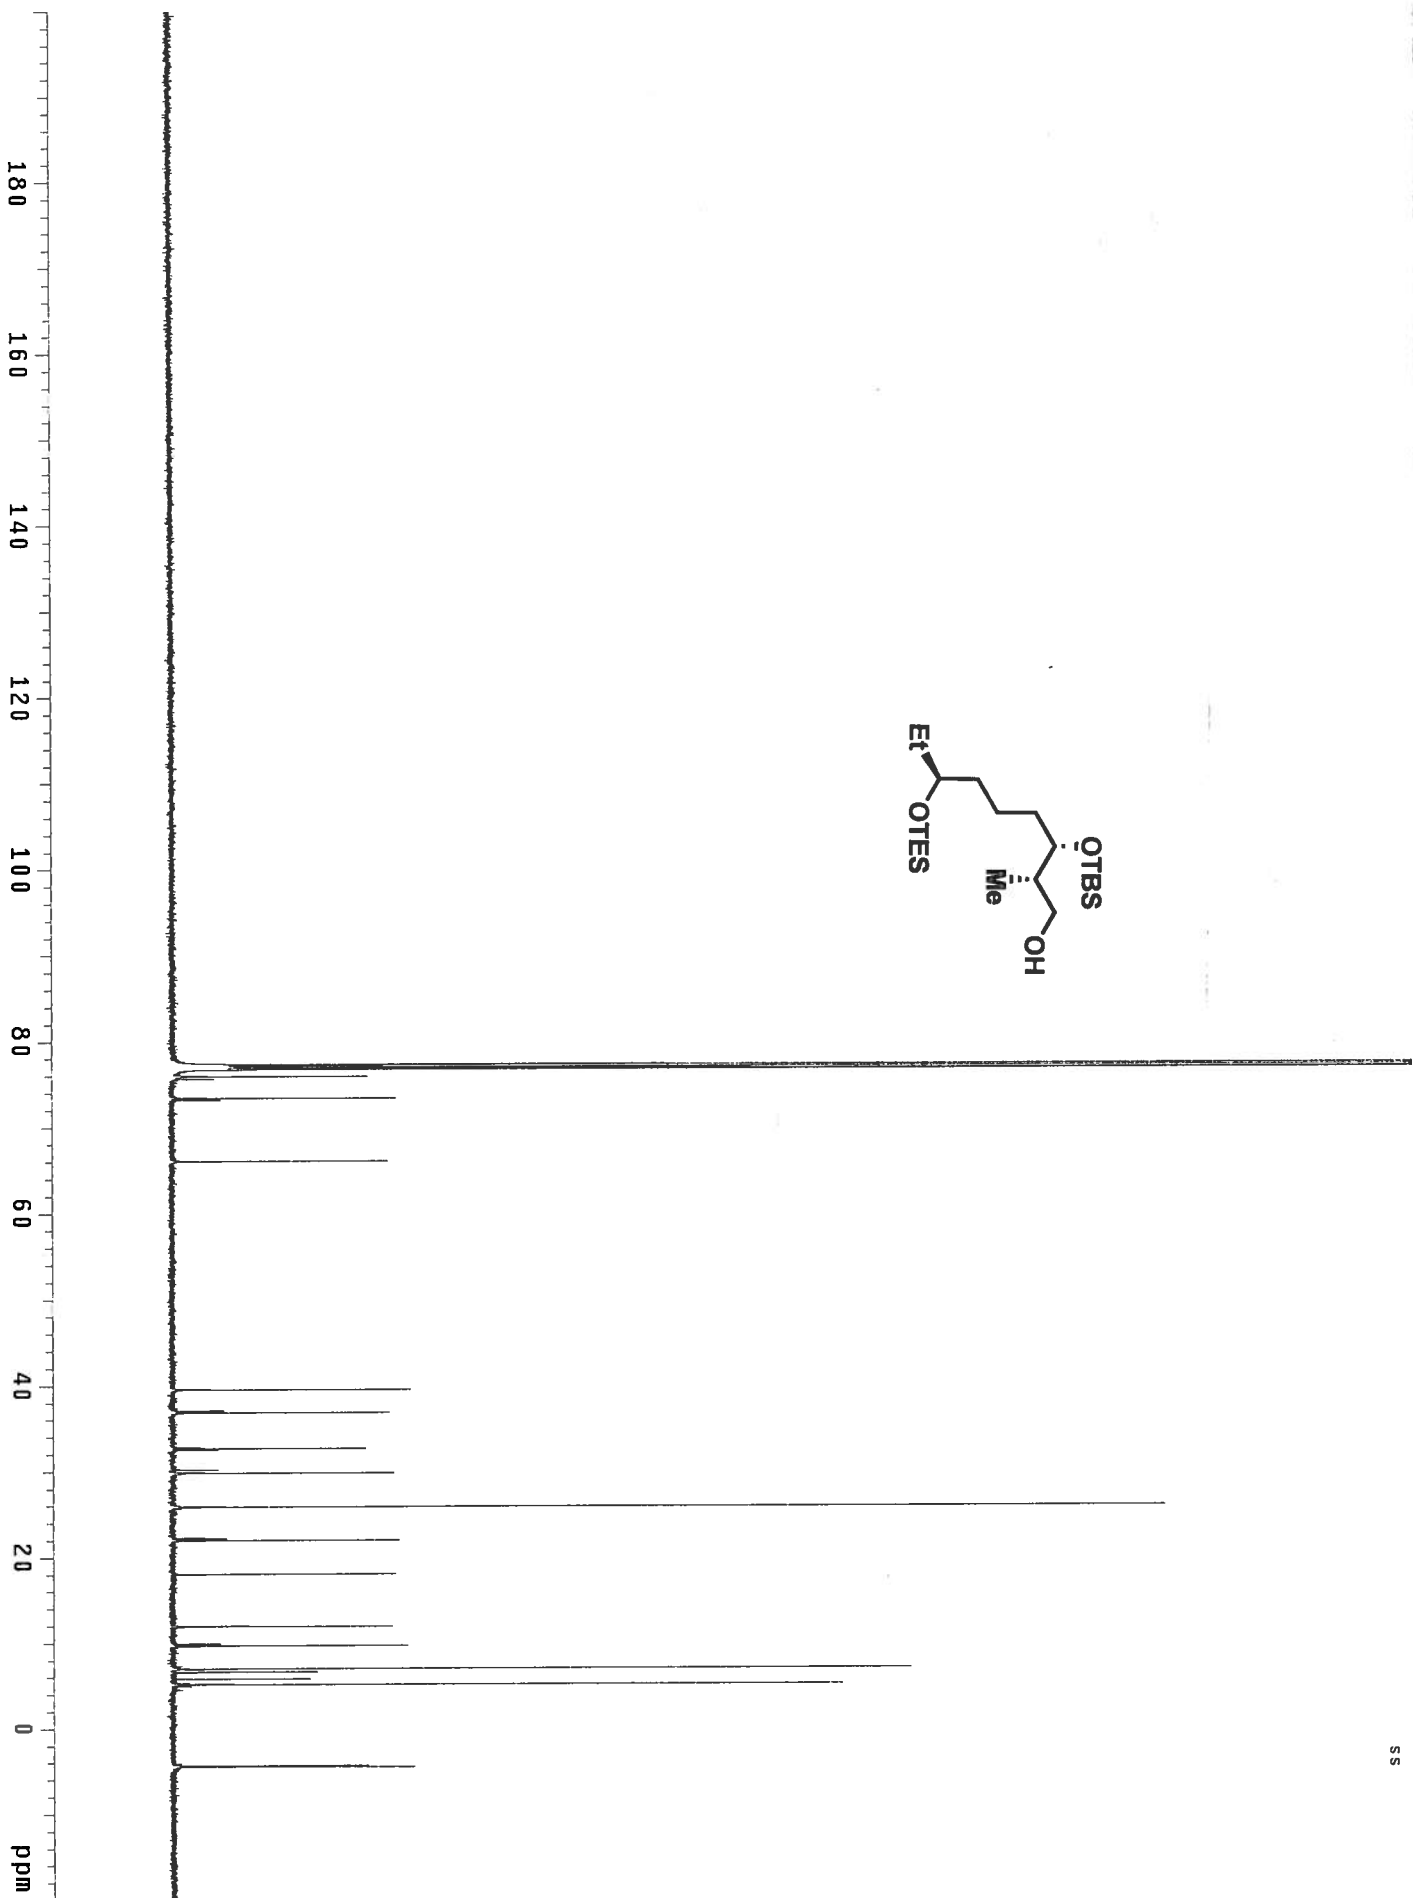

Single Mass Analysis

Tolerance = 5.0 PPM / DBE: min = -50.0, max = 100.0

Isotope cluster parameters: Separation = 1.0 Abundance = 1.0%

Monoisotopic Mass, Odd and Even Electron Ions

36 formula(e) evaluated with 1 results within limits (up to 10 closest results for each mass)

HJ03-174SM

LIU2029 93 (0.932) Cn (Cen,5, 80.00, Ht); Cm (91:119)

15-Nov-200508:42:24

Voltage Cl+

1.35e3

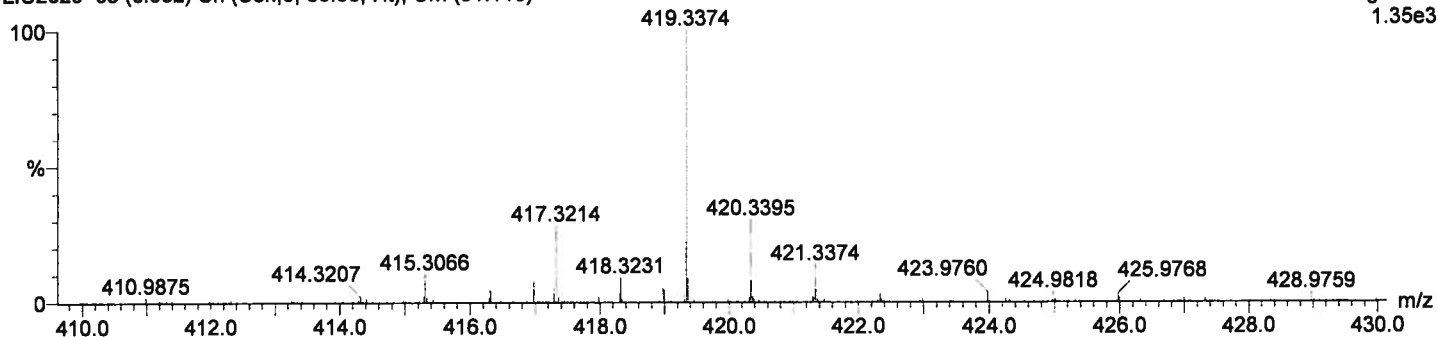

Minimum: -50.0  
Maximum: 500.0 5.0 100.0

| Mass     | Calc. Mass | mDa  | PPM  | DBE  | Score | Formula        |
|----------|------------|------|------|------|-------|----------------|
| 419.3374 | 419.3377   | -0.3 | -0.7 | -0.5 | 1     | C22 H51 O3 Si2 |

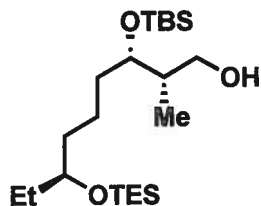



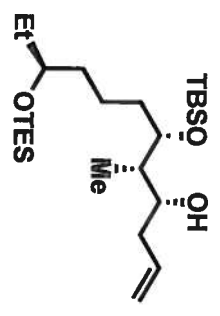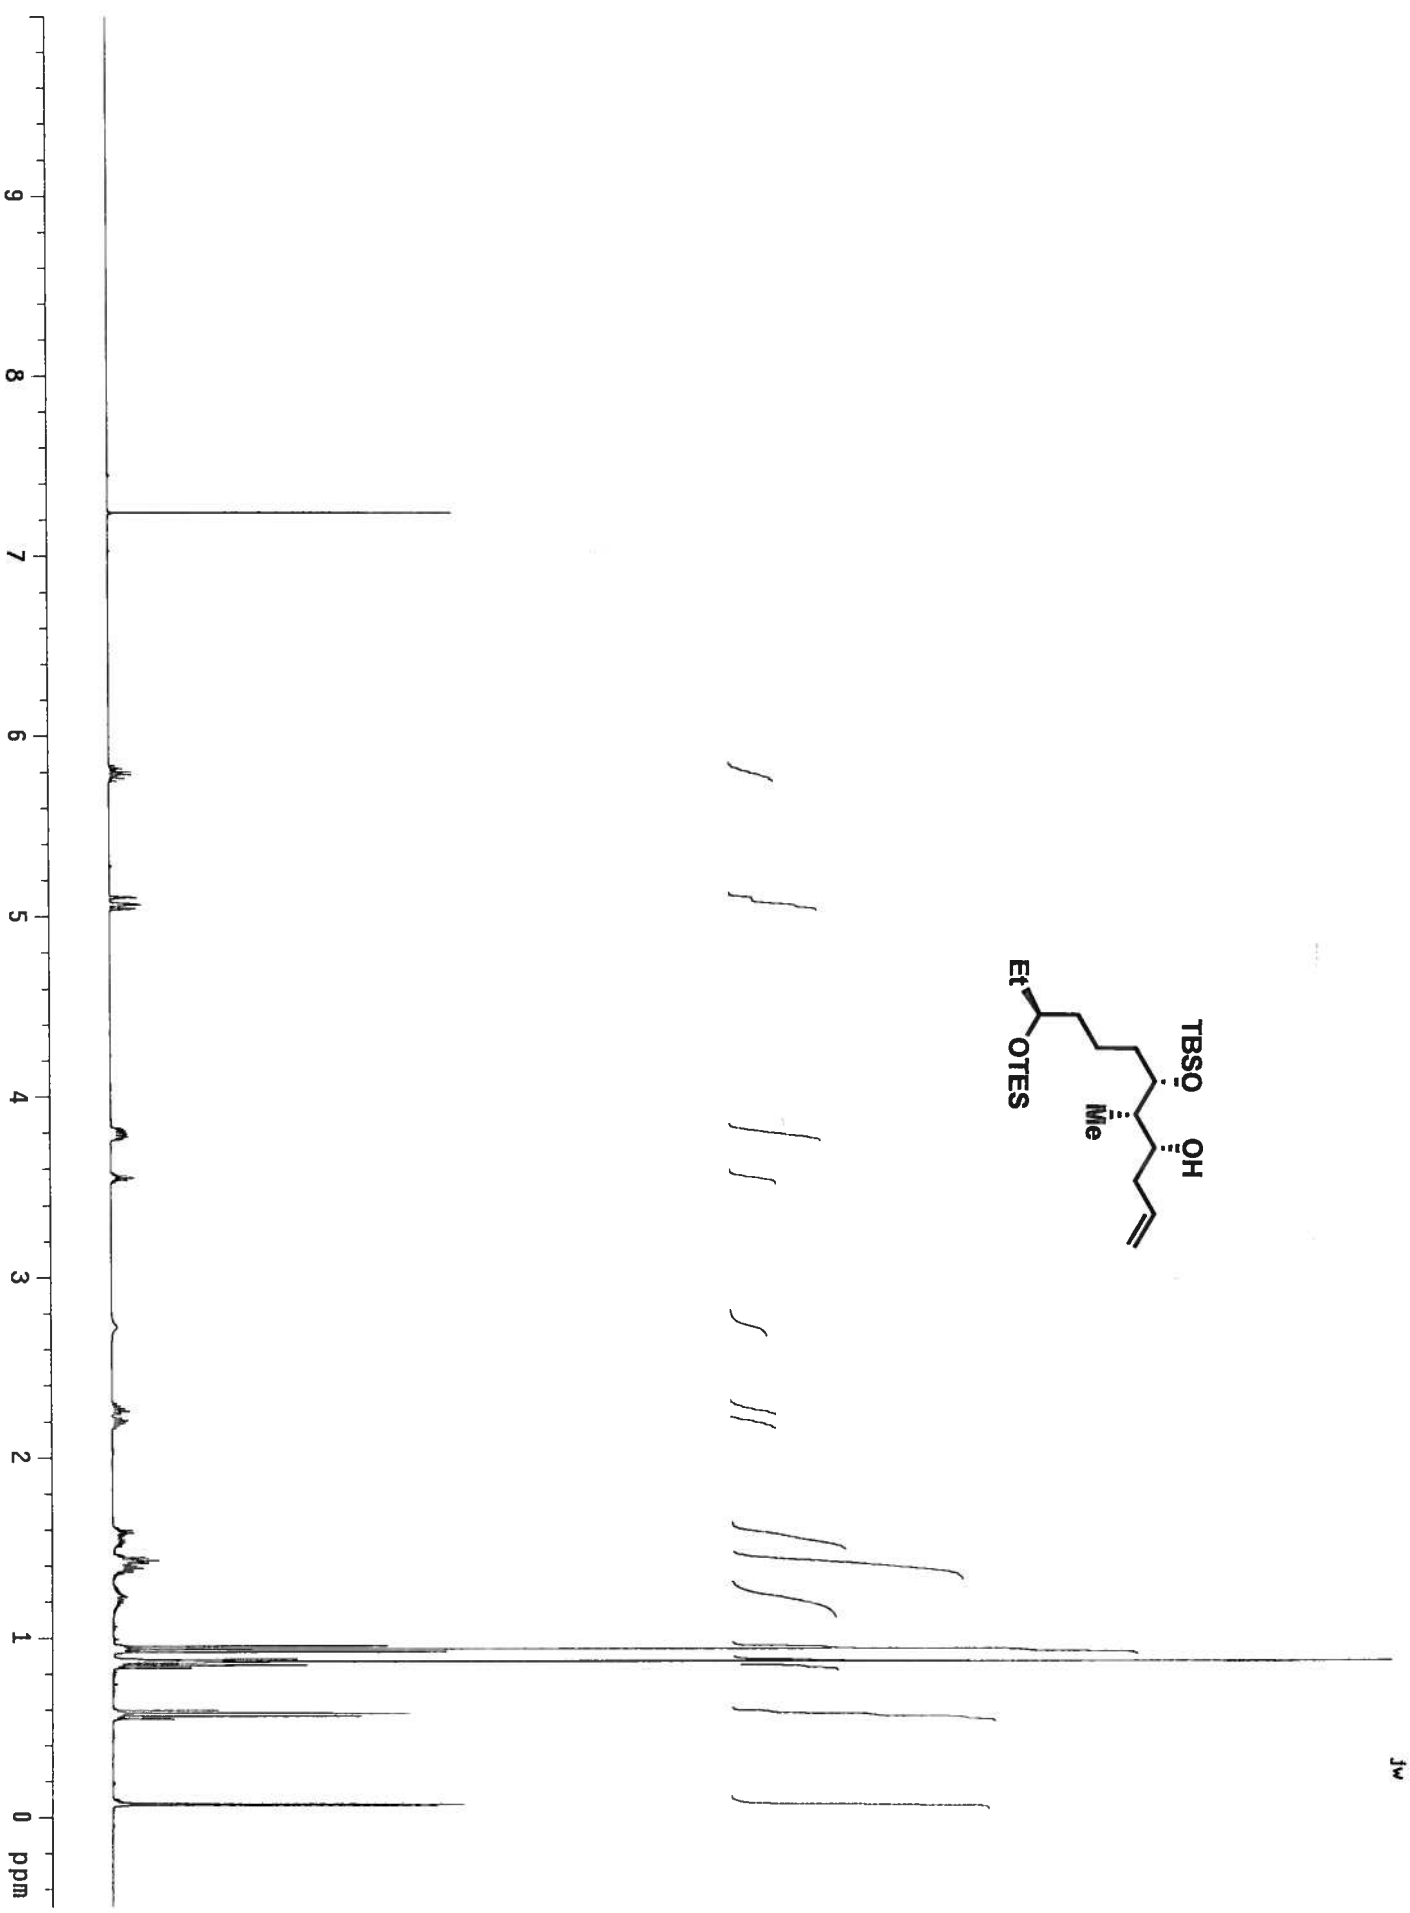

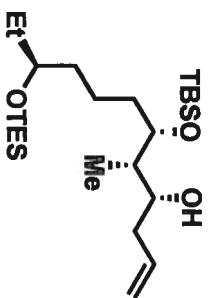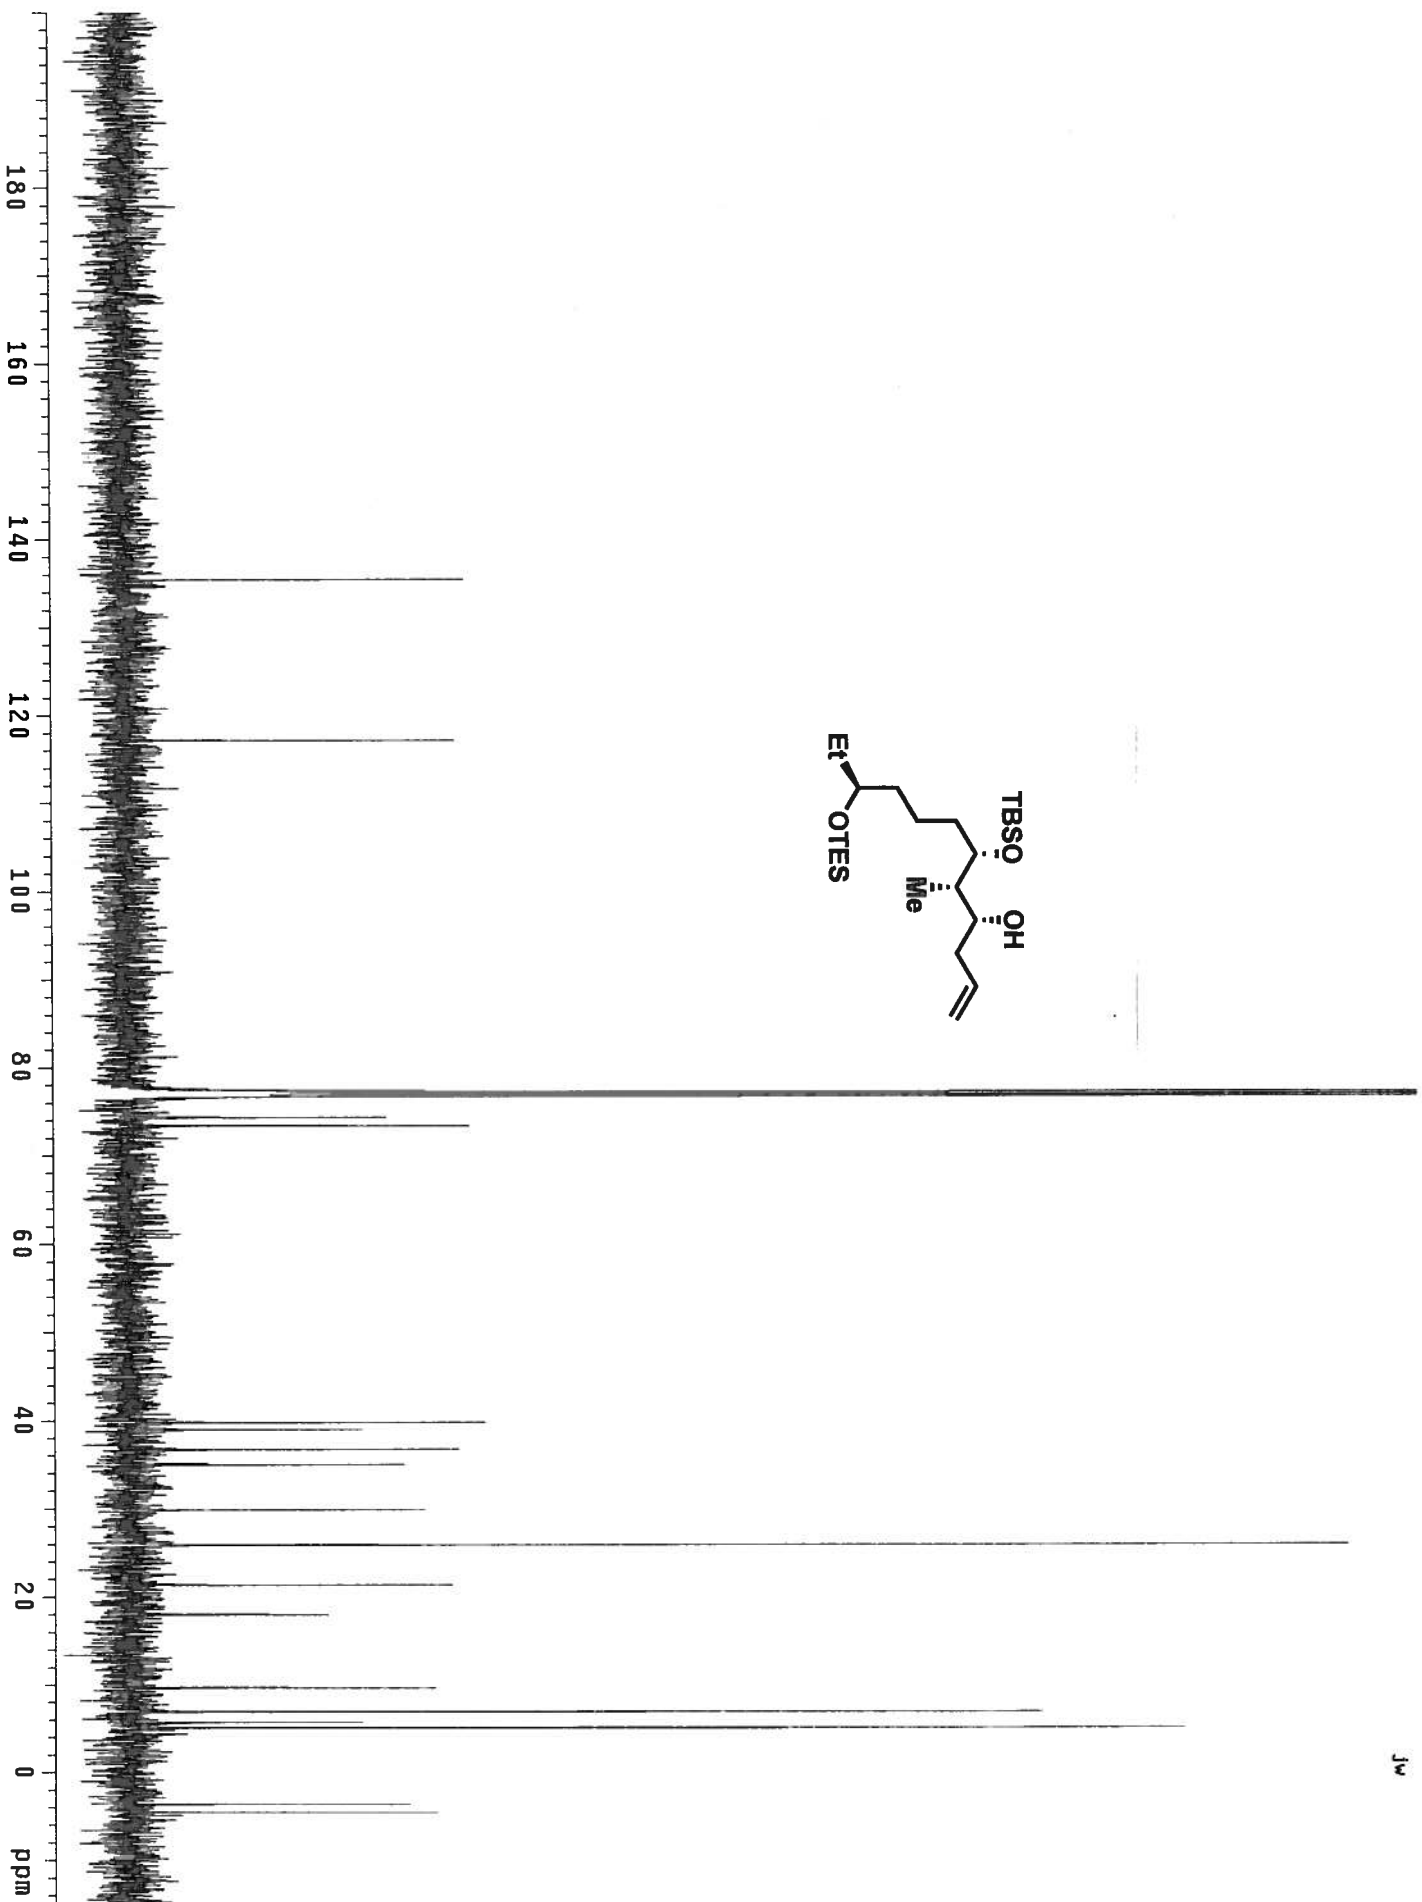

Elemental Composition

Date : 25-JUN-2004

File:J25LN8912 Ident:26 SMO(1,7) PKD(5,3,5,0.01%,5.0,0.00%,F,F)  
 ZAB-E4F CI+ Voltage BpI:2159 TIC:1167147 Flags:NORM DEL ERR  
 File Text:I-RP-140B / RONGSUN  
 Heteroatom Max: 20 Ion: Both Even and Odd  
 Limits:

| Mass       | mDa | PPM | Calc. Mass | DBE          | C        | H        | O      | Si     |
|------------|-----|-----|------------|--------------|----------|----------|--------|--------|
| 457.353052 | 5.0 |     |            | -0.5<br>16.0 | 0<br>200 | 0<br>400 | 0<br>3 | 0<br>2 |
| 457.353052 | 0.3 | 0.6 | 457.353328 | 1.5          | 25       | 53       | 3      | 2      |

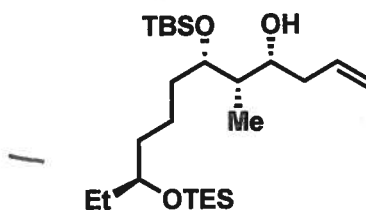

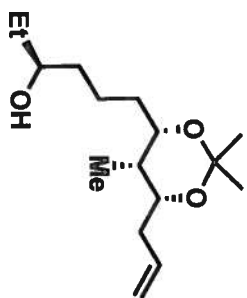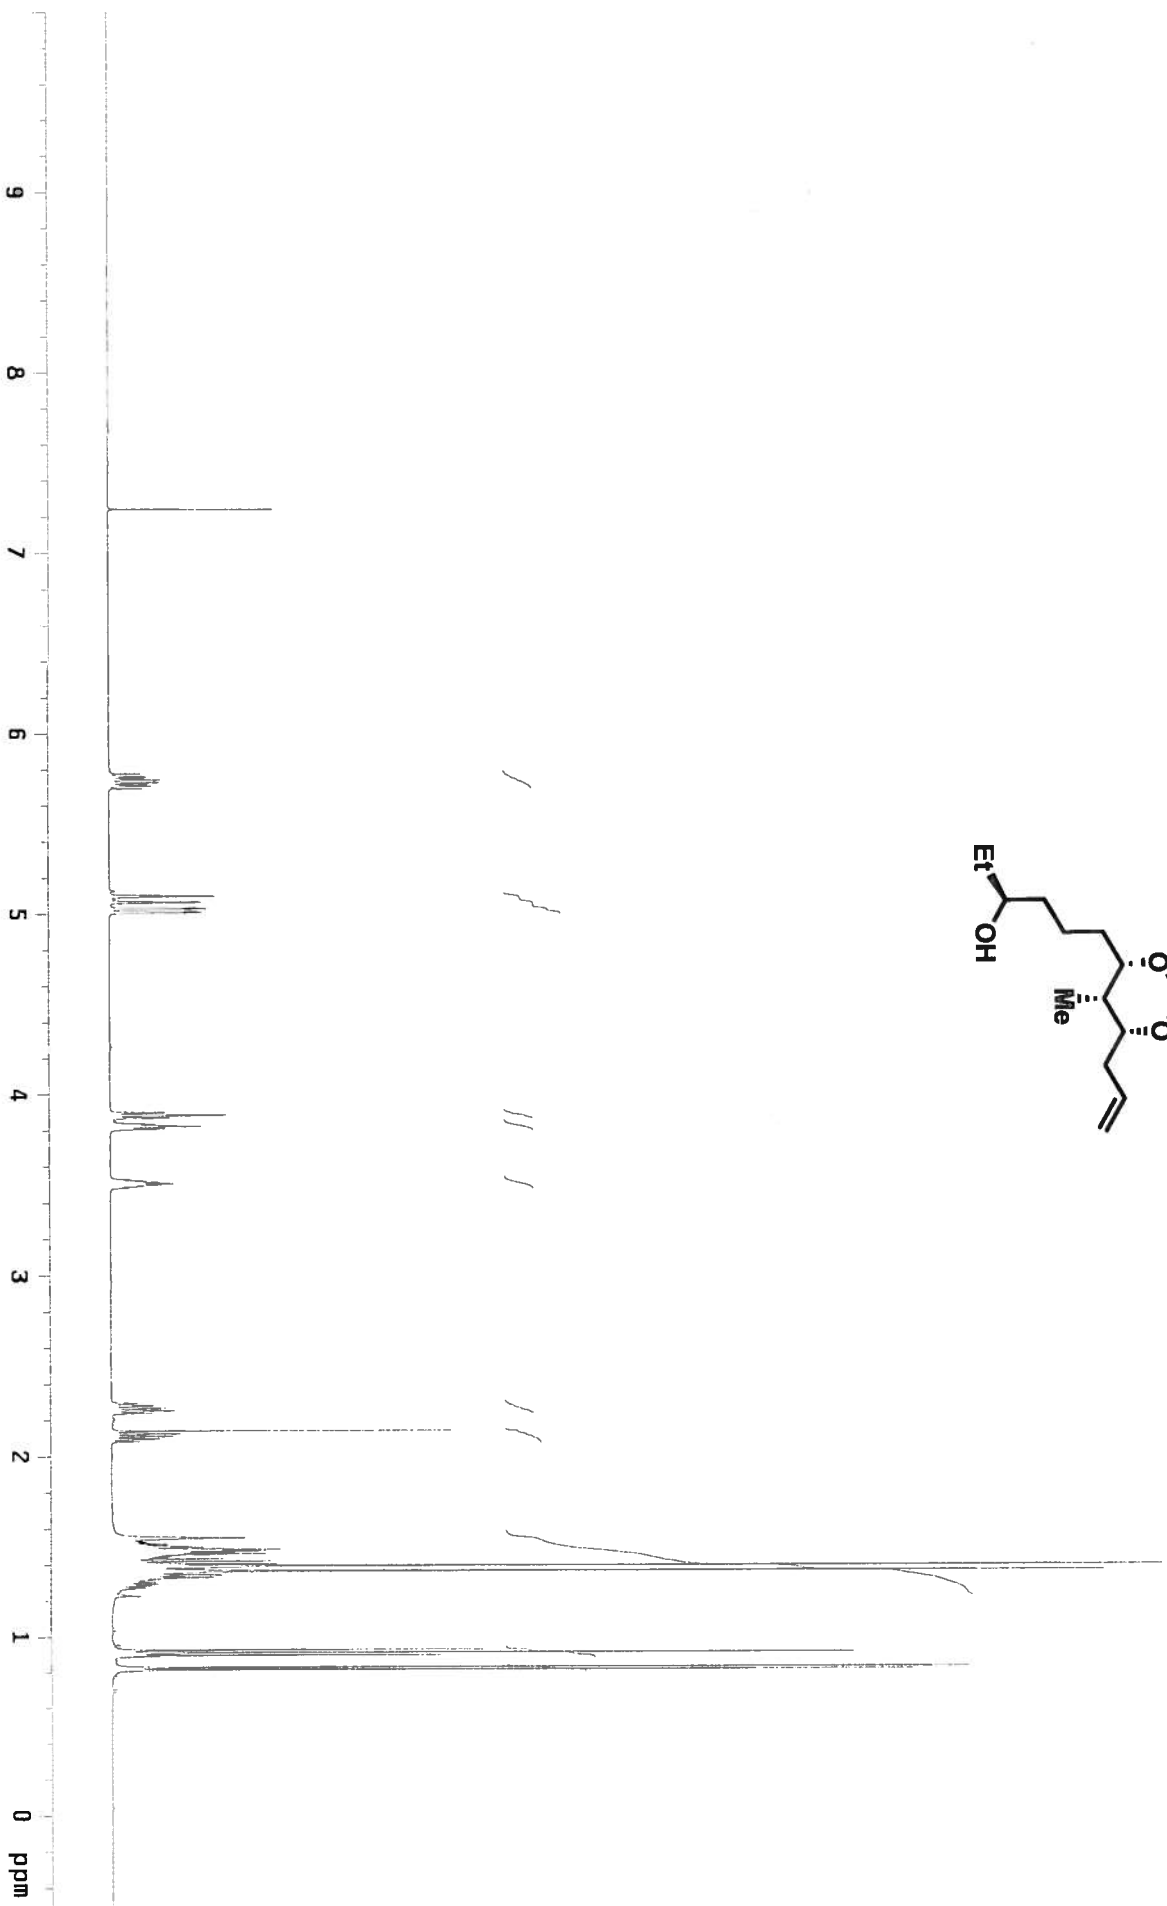

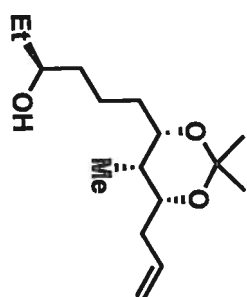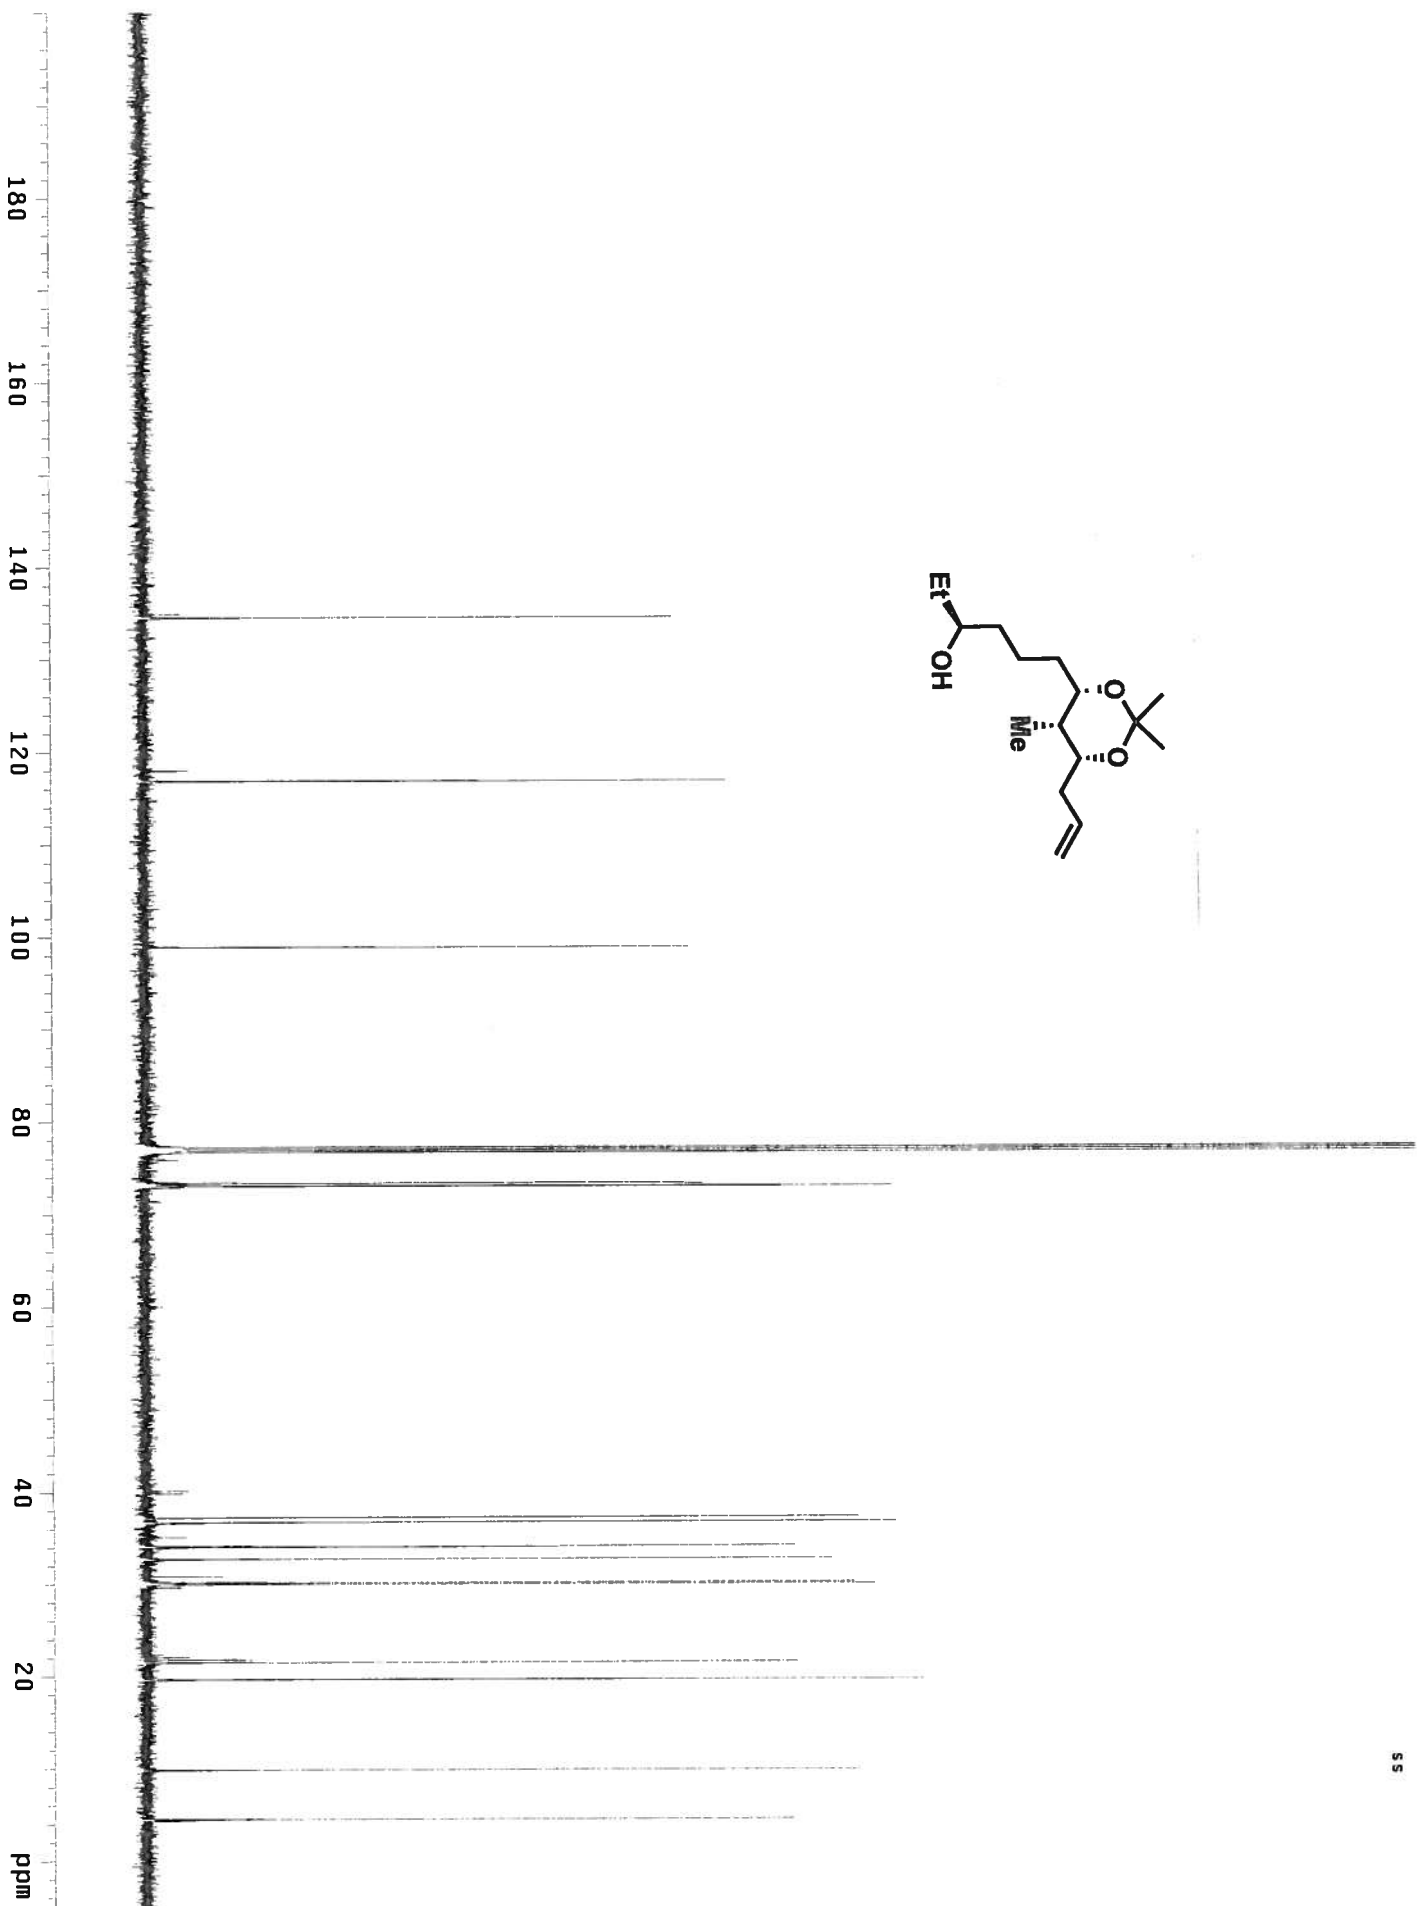

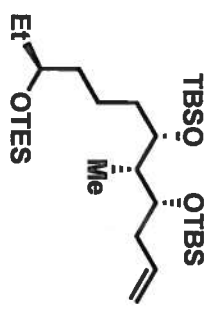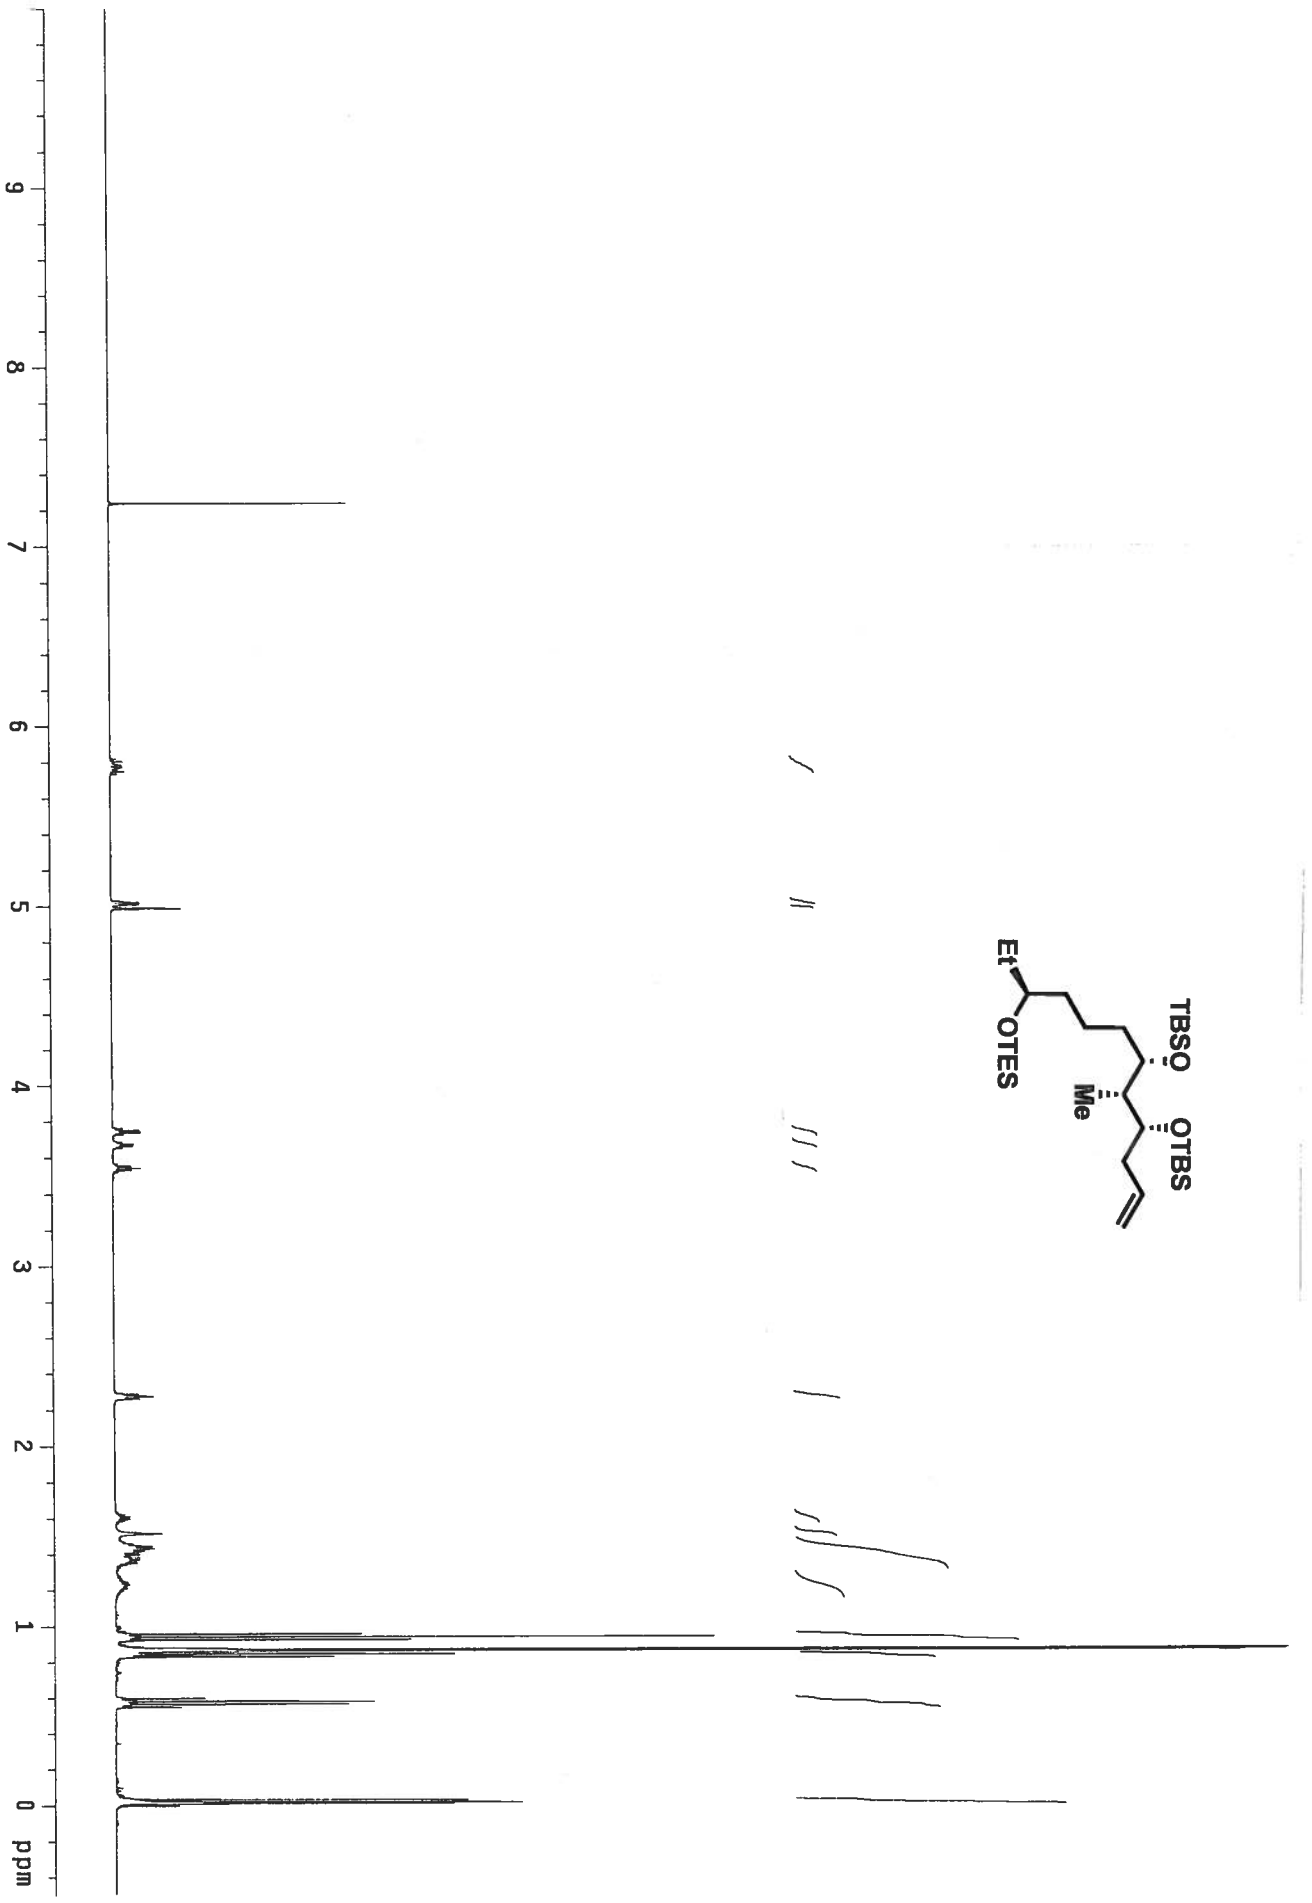

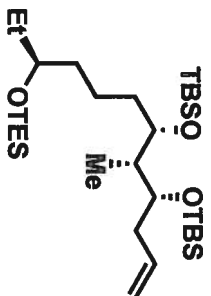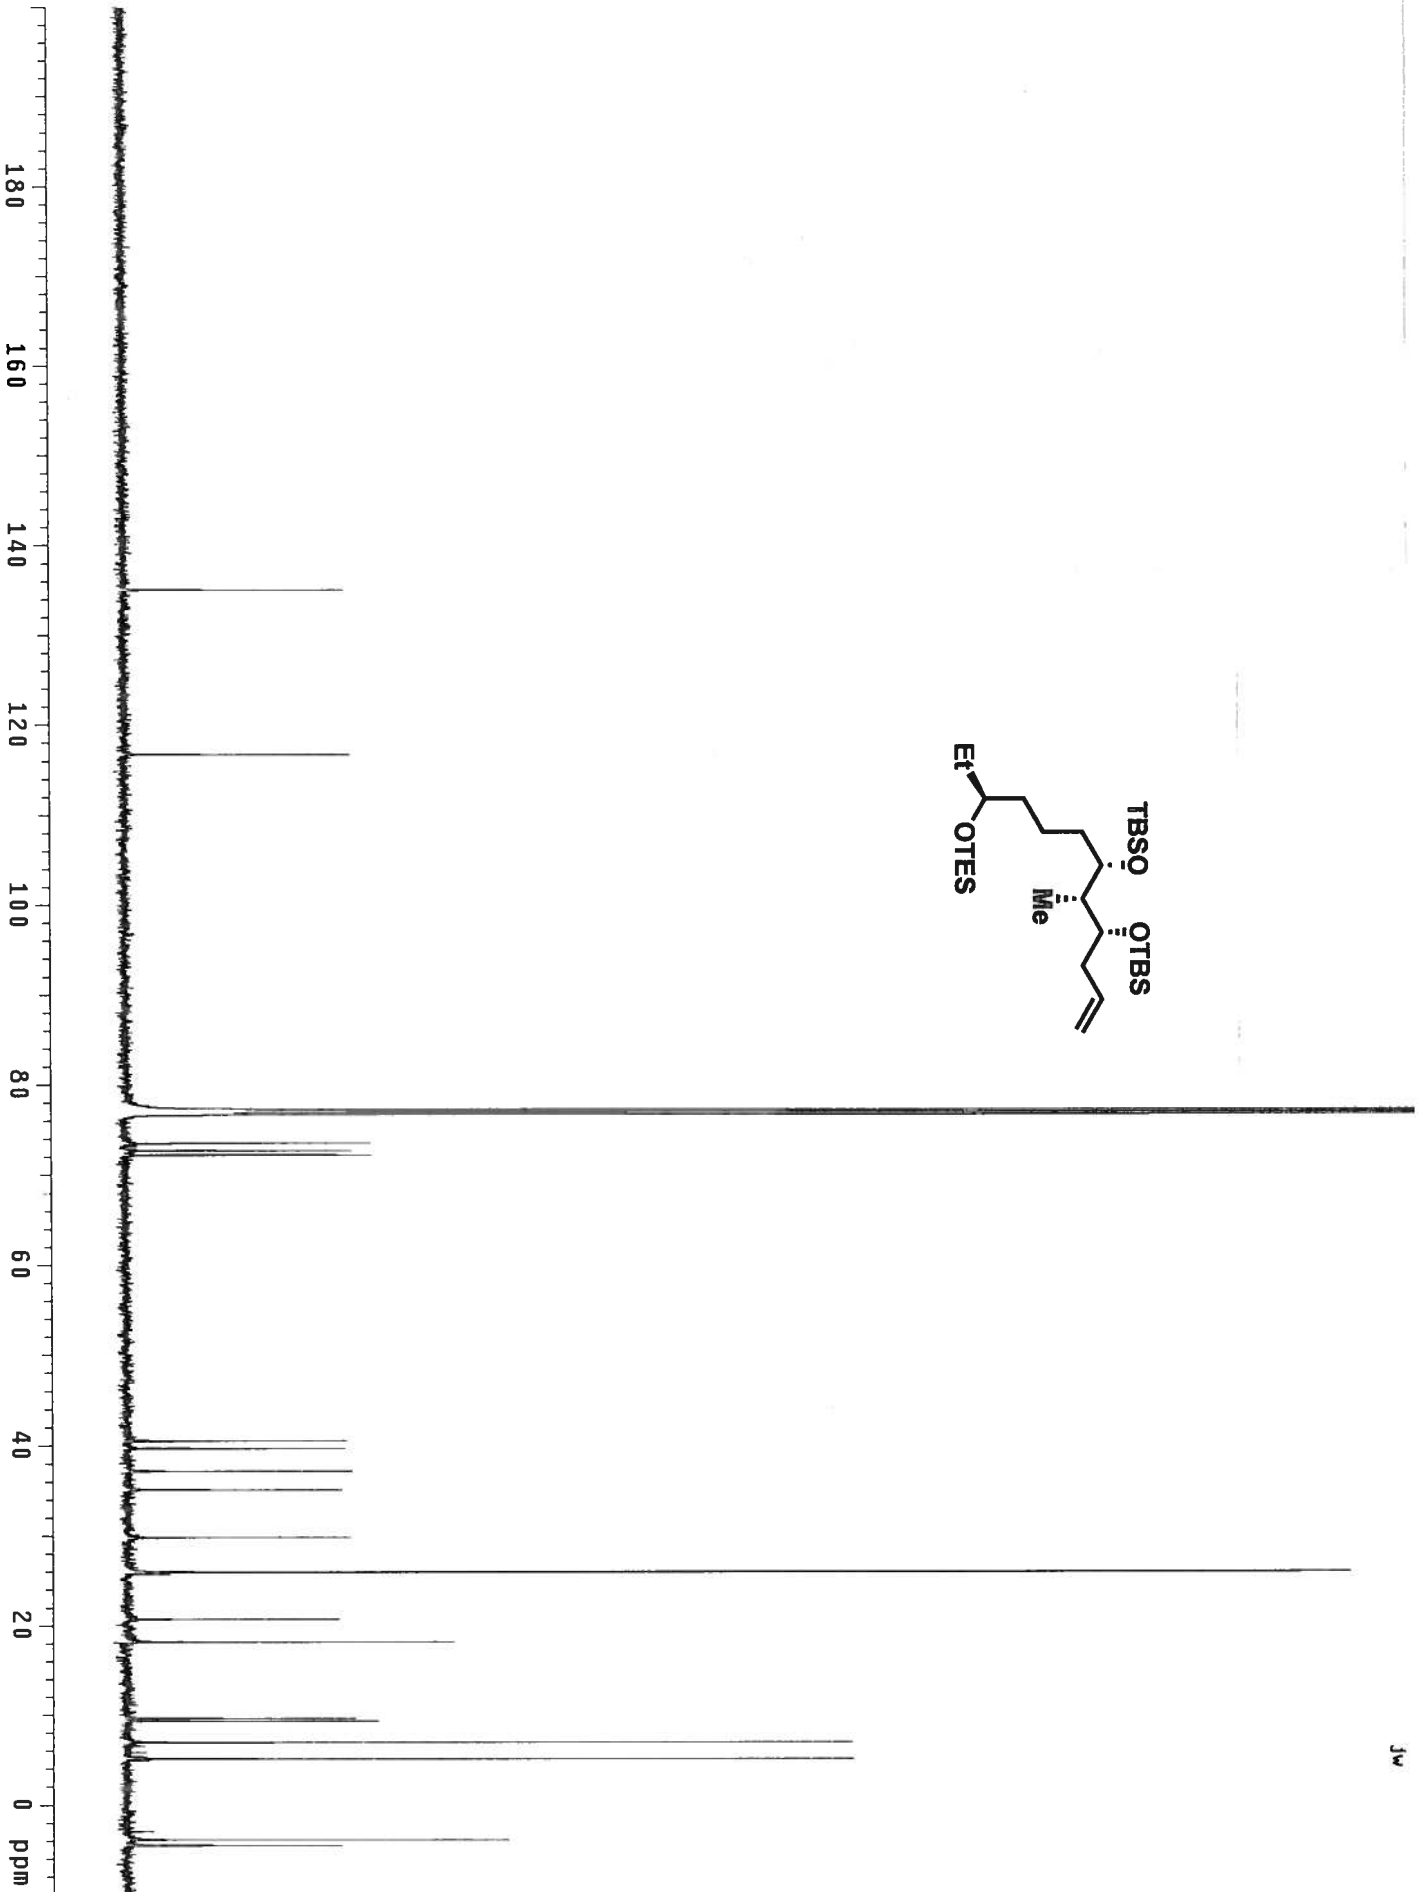

Single Mass Analysis

Tolerance = 5.0 PPM / DBE: min = -50.0, max = 100.0

Isotope cluster parameters: Separation = 1.0 Abundance = 1.0%

Monoisotopic Mass, Odd and Even Electron Ions

108 formula(e) evaluated with 1 results within limits (up to 10 closest results for each mass)

HJ04-010

LIU2032 32 (0.321) Cn (Cen,3, 80.00, Ht); Cm (25:50)

14-Nov-200517:20:42

Voltage Cl+

1.93e3

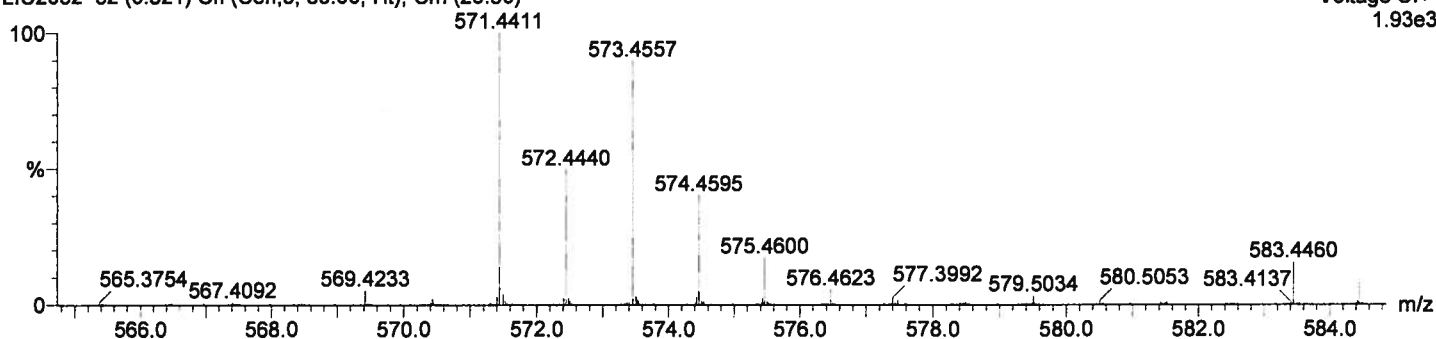

Minimum: -50.0  
Maximum: 500.0 5.0 100.0

| Mass     | Calc. Mass | mDa | PPM | DBE | Score | Formula        |
|----------|------------|-----|-----|-----|-------|----------------|
| 573.4557 | 573.4555   | 0.2 | 0.4 | 0.5 | 1     | C31 H69 O3 Si3 |

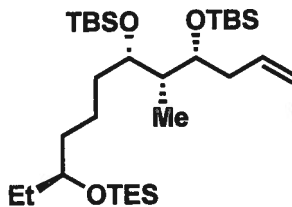



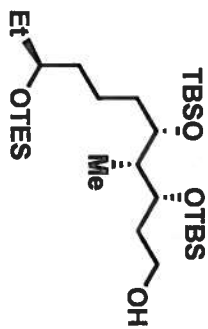

|||
   
 |||
   
 |||

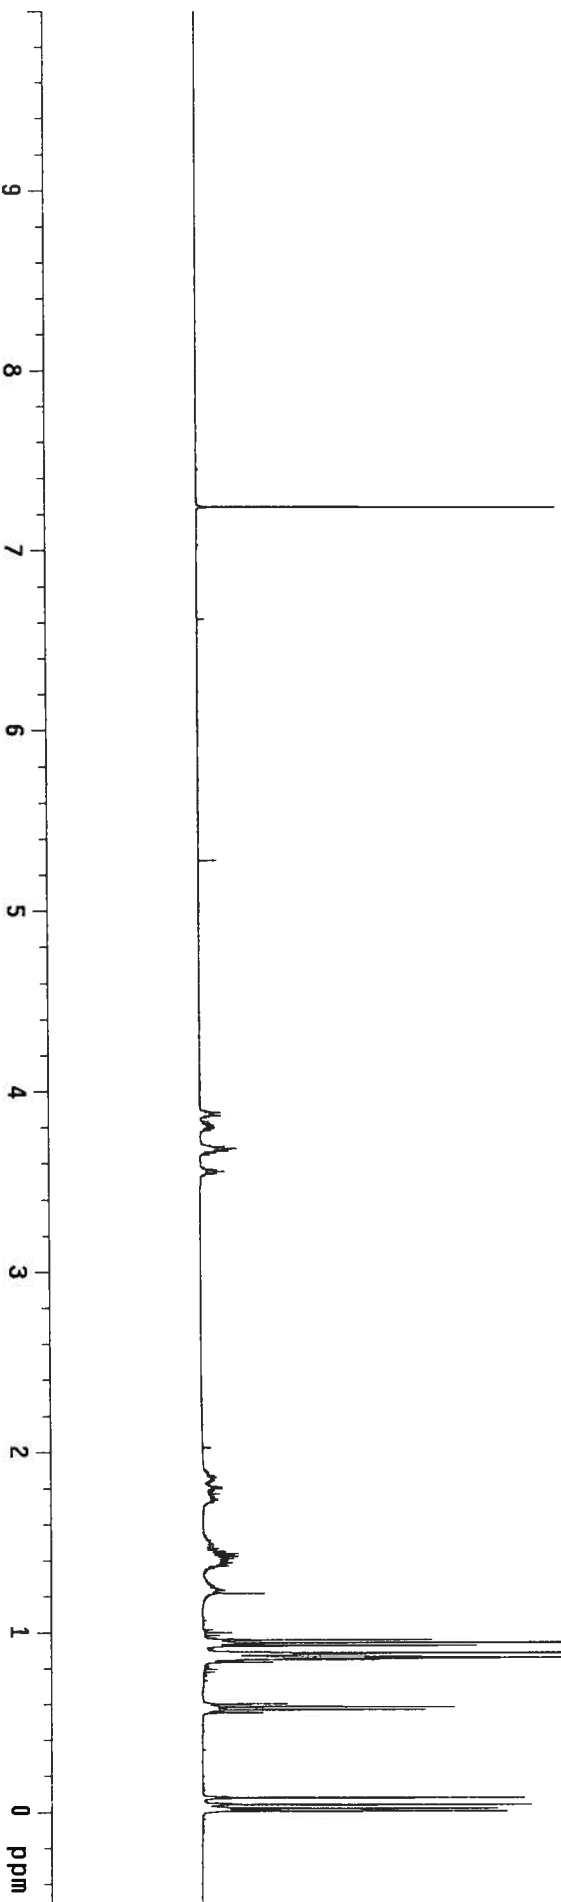

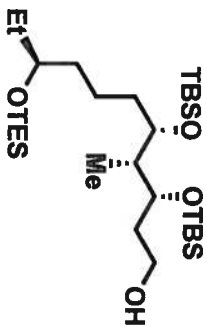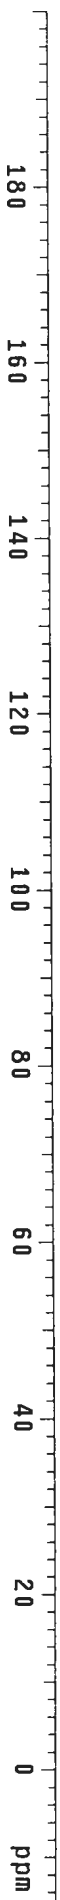

Elemental Composition

Date : 27-APR-2004

File:LIU8908 Ident:14\_18 SMO(1,5) BSUB(128,15,-3.0)  
 ZAB-E4F CI+ Voltage BpI:398384 TIC:19857072 Flags:NORM  
 File Text:FG 69  
 Heteroatom Max: 50 Ion: Both Even and Odd  
 Limits:

|             |            |            |                   |            |          |          |          |           |
|-------------|------------|------------|-------------------|------------|----------|----------|----------|-----------|
| 577.448257  |            | 5.0        |                   | -0.5       | 0        | 0        | 0        | 3         |
|             |            |            |                   | 60.0       | 200      | 400      | 9        | 3         |
| <b>Mass</b> | <b>mDa</b> | <b>PPM</b> | <b>Calc. Mass</b> | <b>DBE</b> | <b>C</b> | <b>H</b> | <b>O</b> | <b>Si</b> |
| 577.448257  | 2.1        | 3.7        | 577.450372        | -0.5       | 30       | 69       | 4        | 3         |

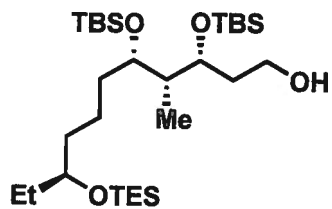

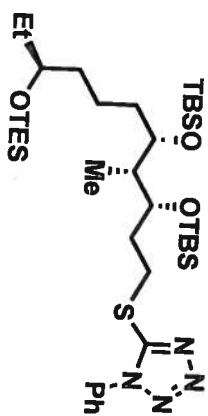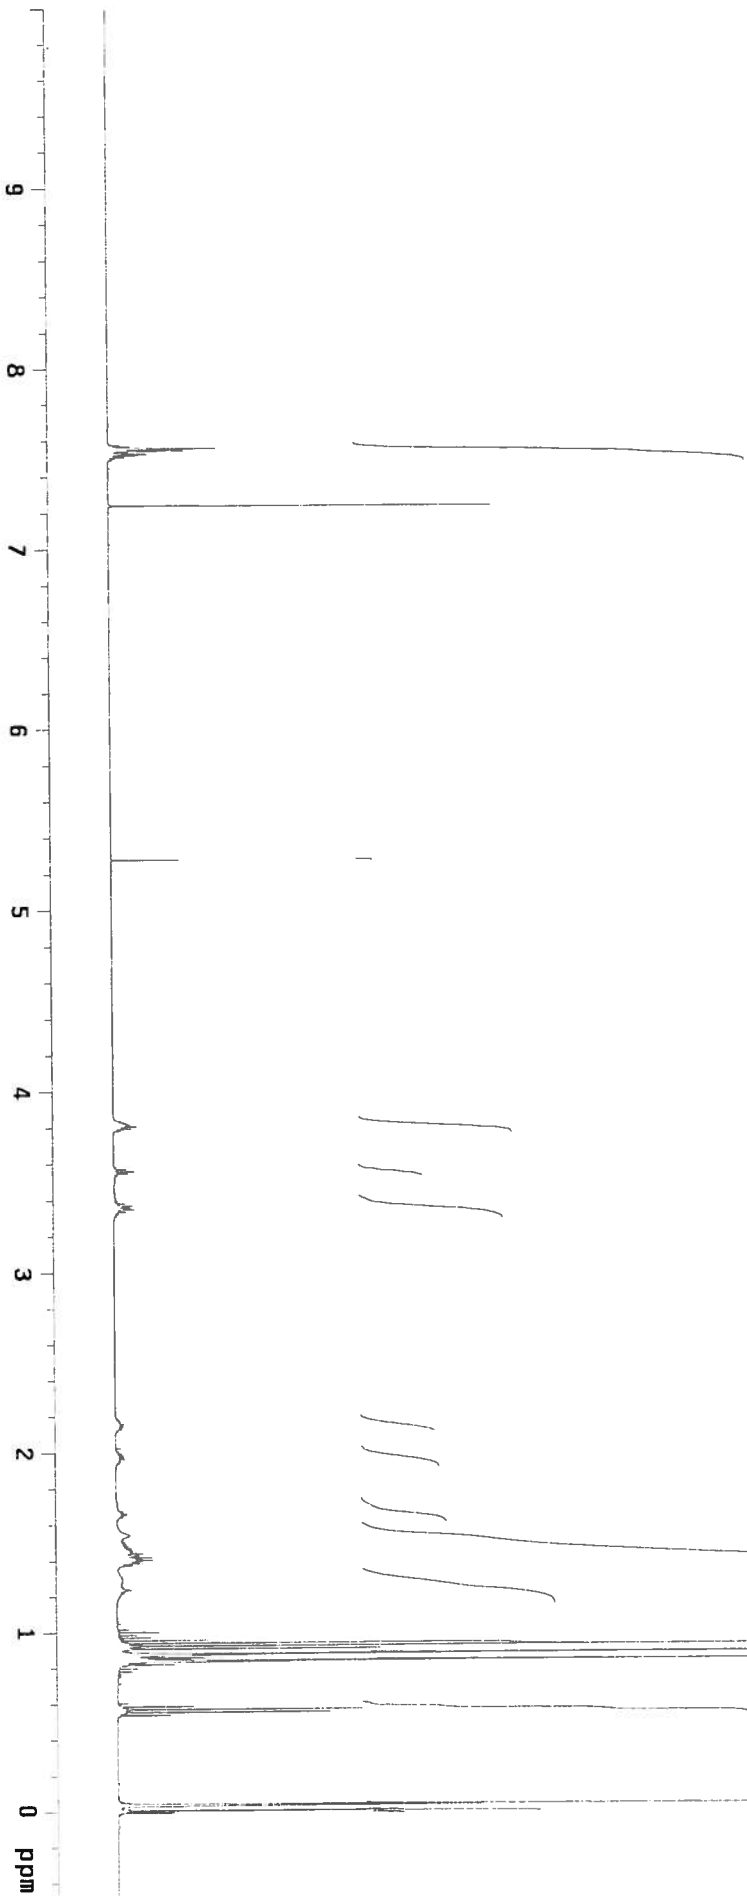

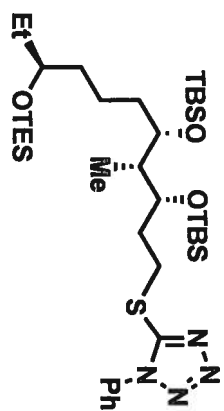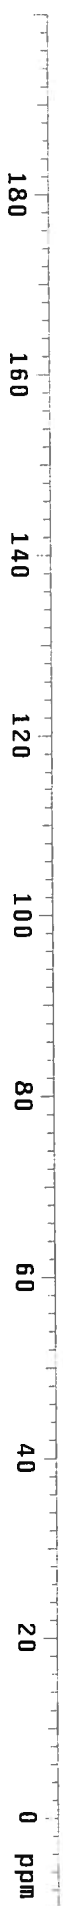

Elemental Composition

Date : 27-APR-2004

File:LIU8907 Ident:18 SMO(1,5) BSUB(128,15,-3.0)  
 ZAB-E4F CI+ Voltage BpI:36256 TIC:2326358 Flags:NORM  
 File Text:FG 69  
 Heteroatom Max: 50 Ion: Both Even and Odd  
 Limits:

| Mass       | mDa | PPM | Calc. Mass | DBE  | C   | H   | N | O | Si | S |
|------------|-----|-----|------------|------|-----|-----|---|---|----|---|
| 737.468879 | 5.0 |     |            | -0.5 | 0   | 0   | 4 | 0 | 3  | 1 |
|            |     |     |            | 60.0 | 200 | 400 | 4 | 9 | 3  | 1 |
| 737.468879 | 2.2 | 3.0 | 737.471125 | 6.5  | 37  | 73  | 4 | 3 | 3  | 1 |

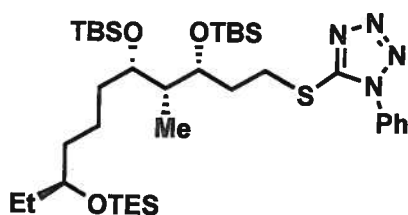

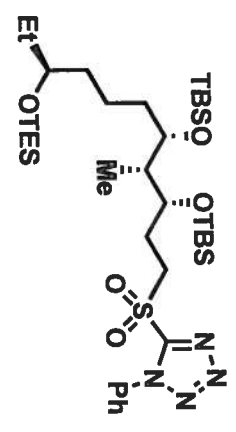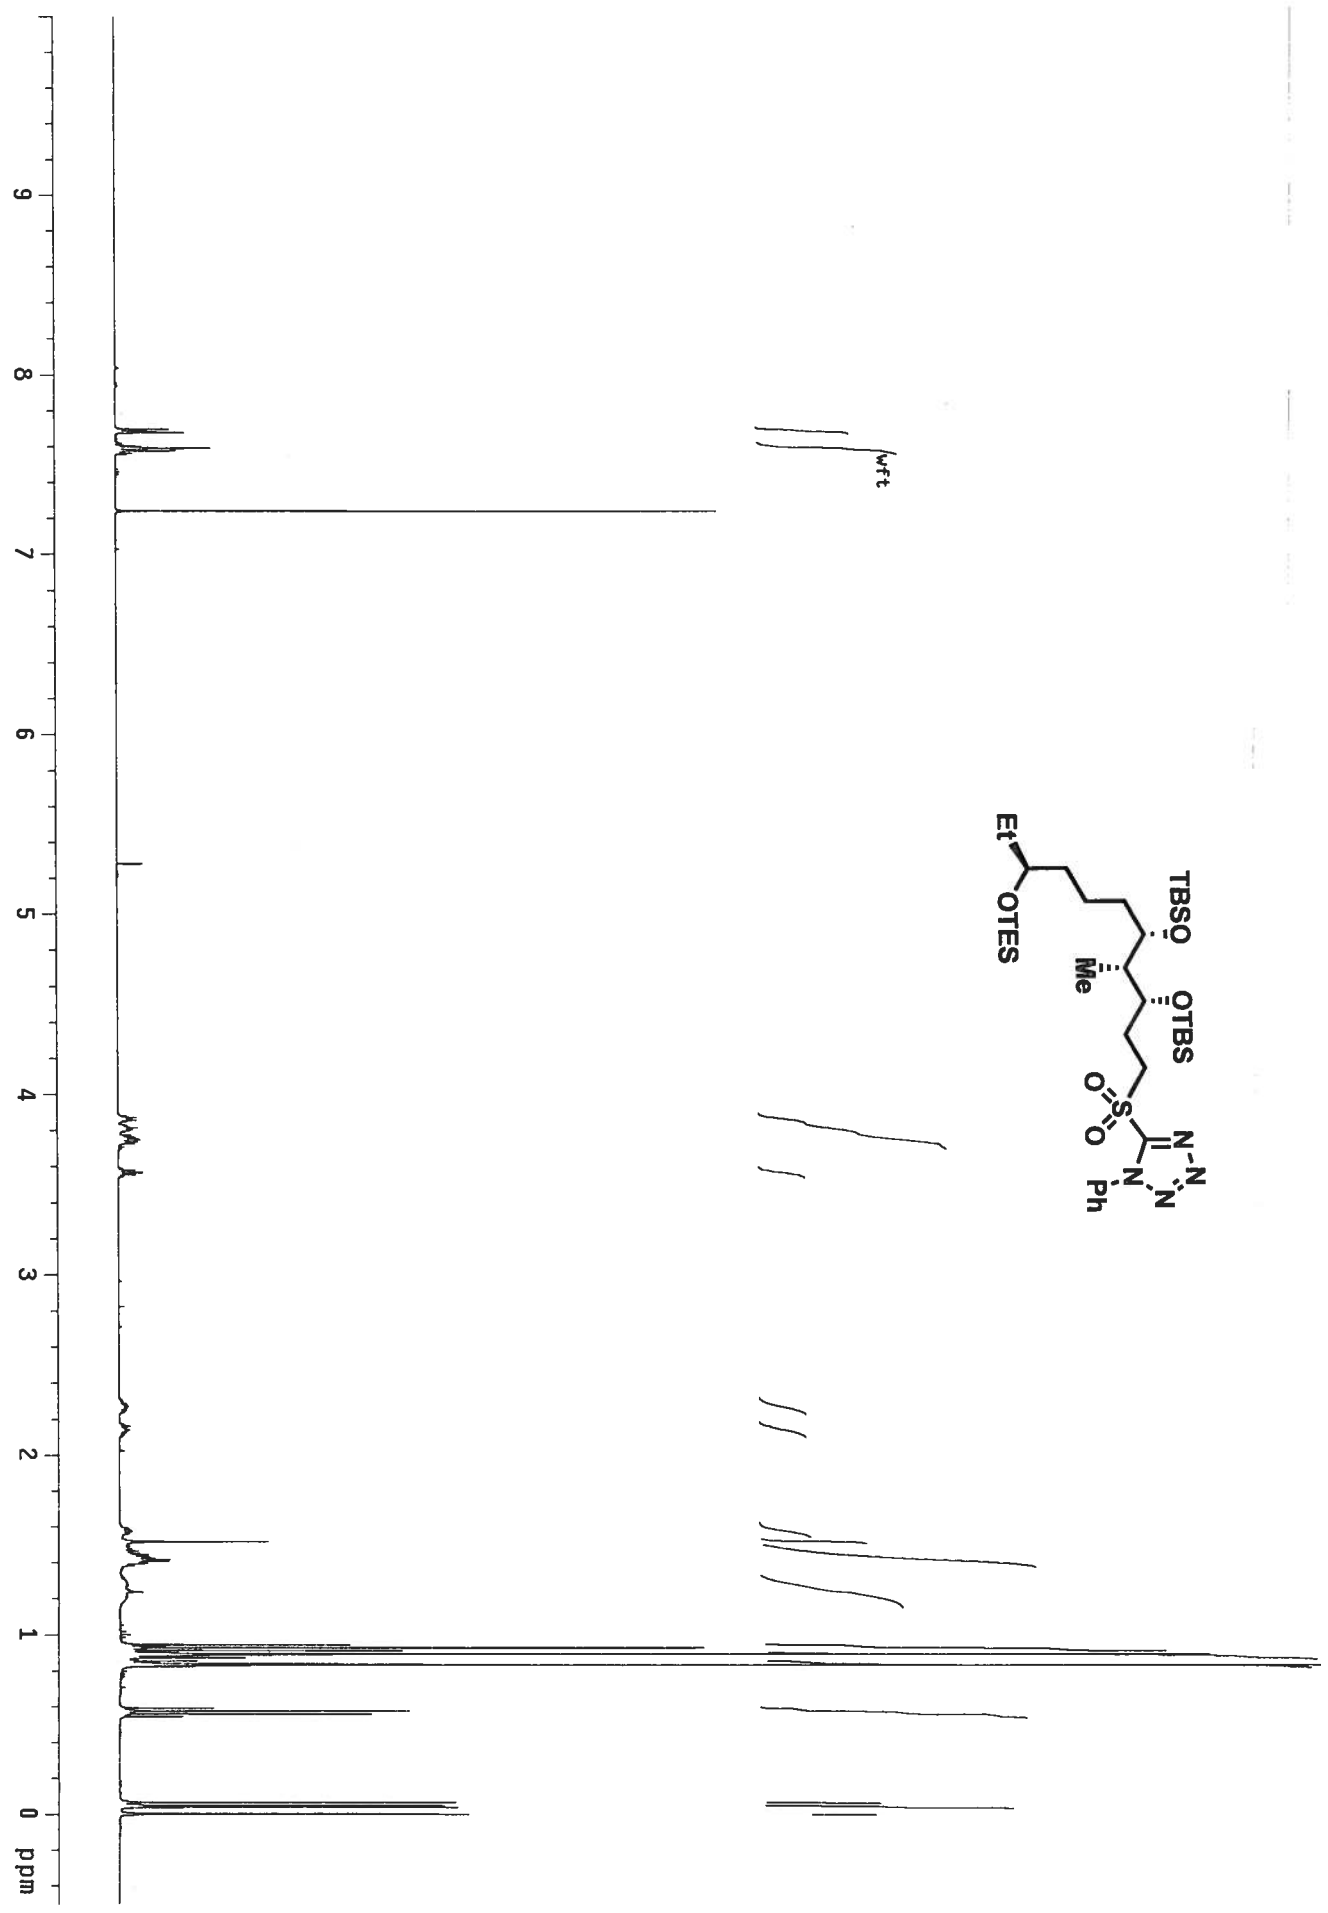

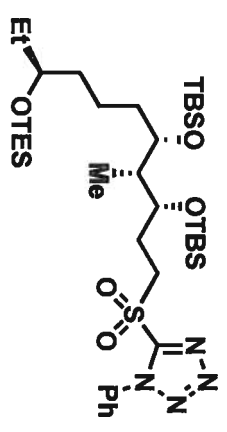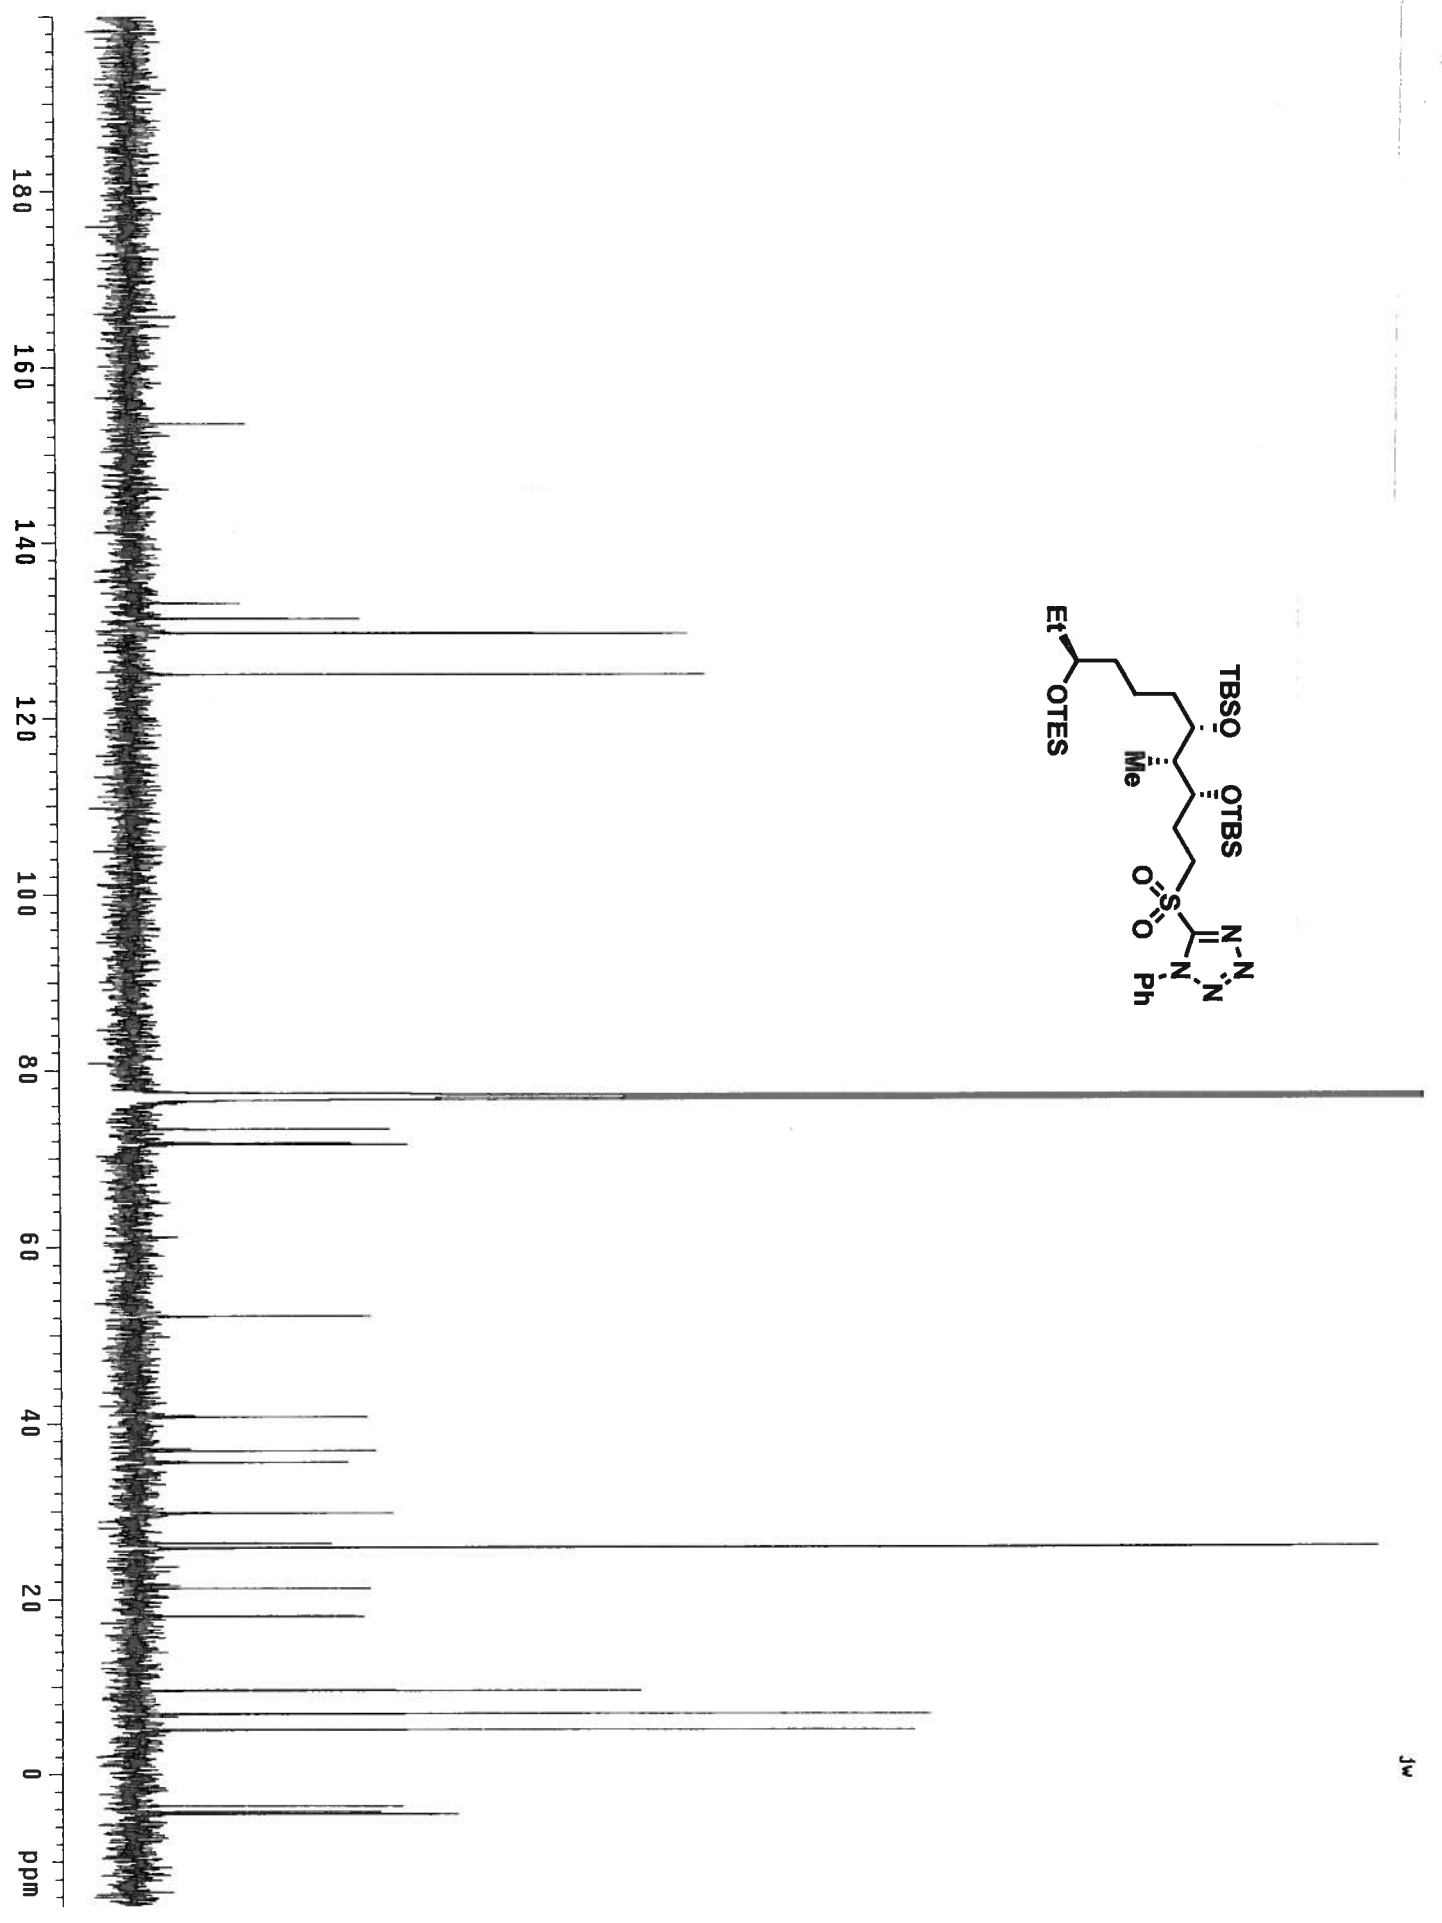



Elemental Composition

Date : 21-MAY-2004

File:LIU8909 Ident:46\_49 SMO(1,5) BSUB(128,15,-3.0)  
 ZAB-E4F CI+ Voltage BpI:49478 TIC:4286041 Flags:NORM  
 File Text:I-RP-129

Heteroatom Max: 20 Ion: Both Even and Odd

Limits:

| Mass       | mDa  | PPM  | Calc. Mass | DBE          | C        | H        | N      | O      | Si     | S      |
|------------|------|------|------------|--------------|----------|----------|--------|--------|--------|--------|
| 769.461965 | 5.0  |      |            | -0.5<br>20.0 | 0<br>200 | 0<br>400 | 4<br>4 | 0<br>8 | 3<br>3 | 1<br>1 |
| 769.461965 | -1.0 | -1.3 | 769.460954 | 6.5          | 37       | 73       | 4      | 5      | 3      | 1      |

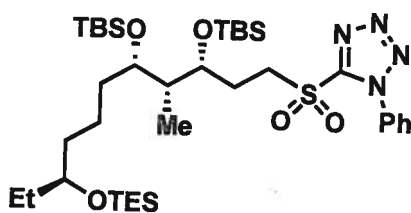

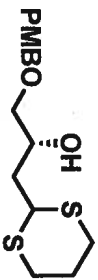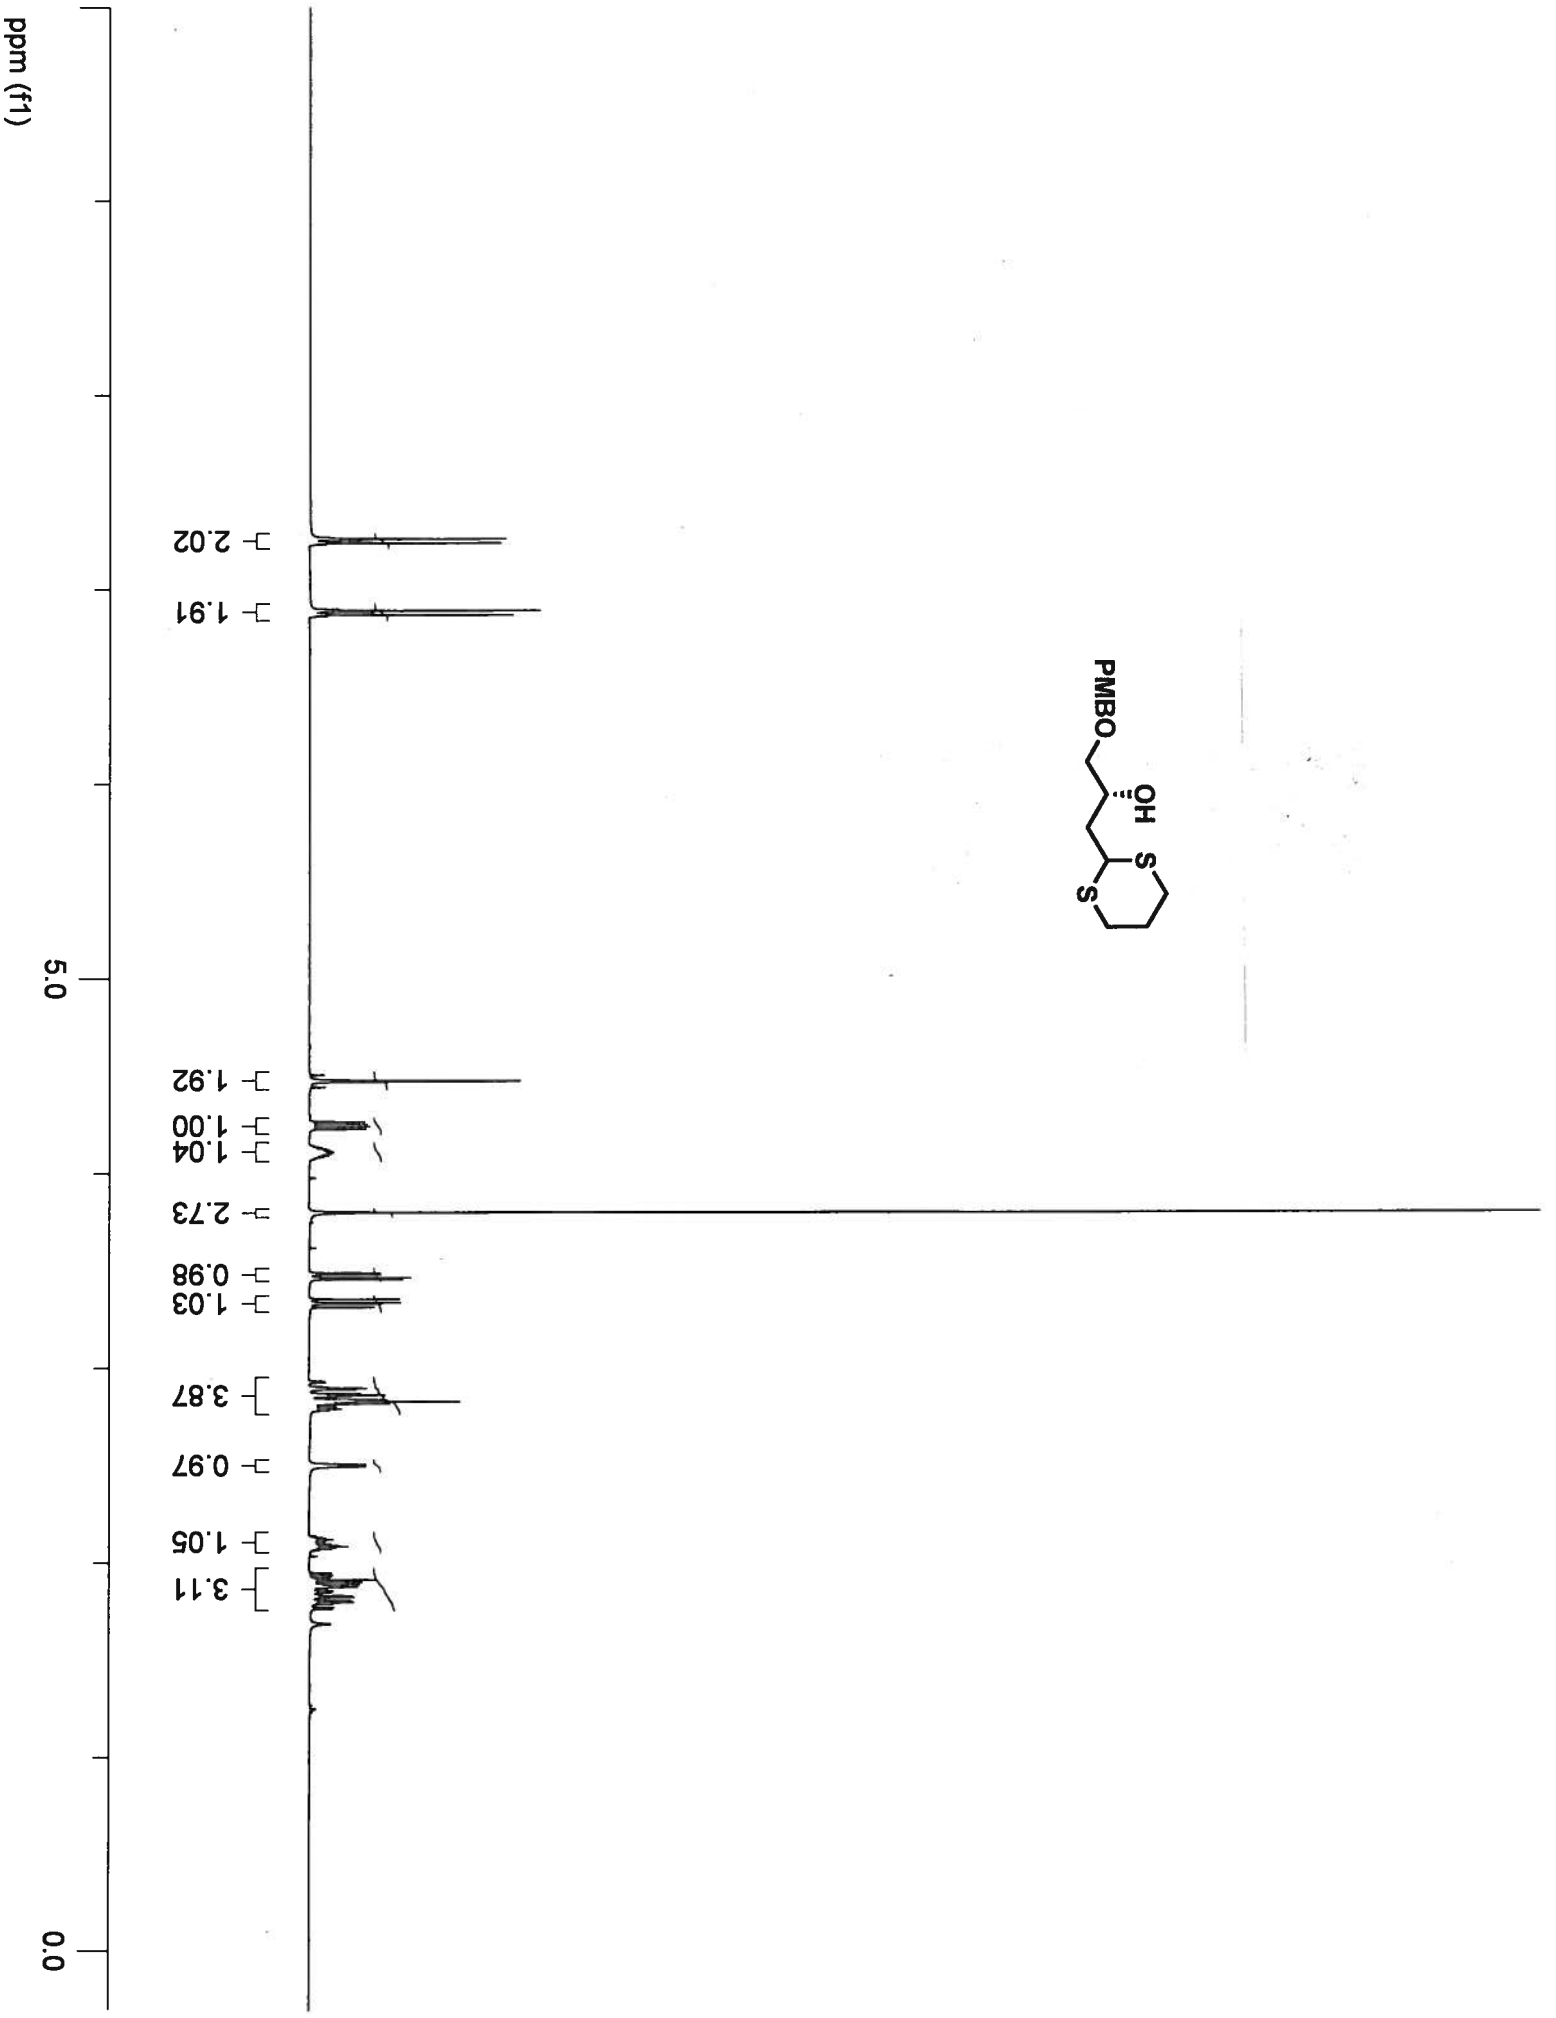

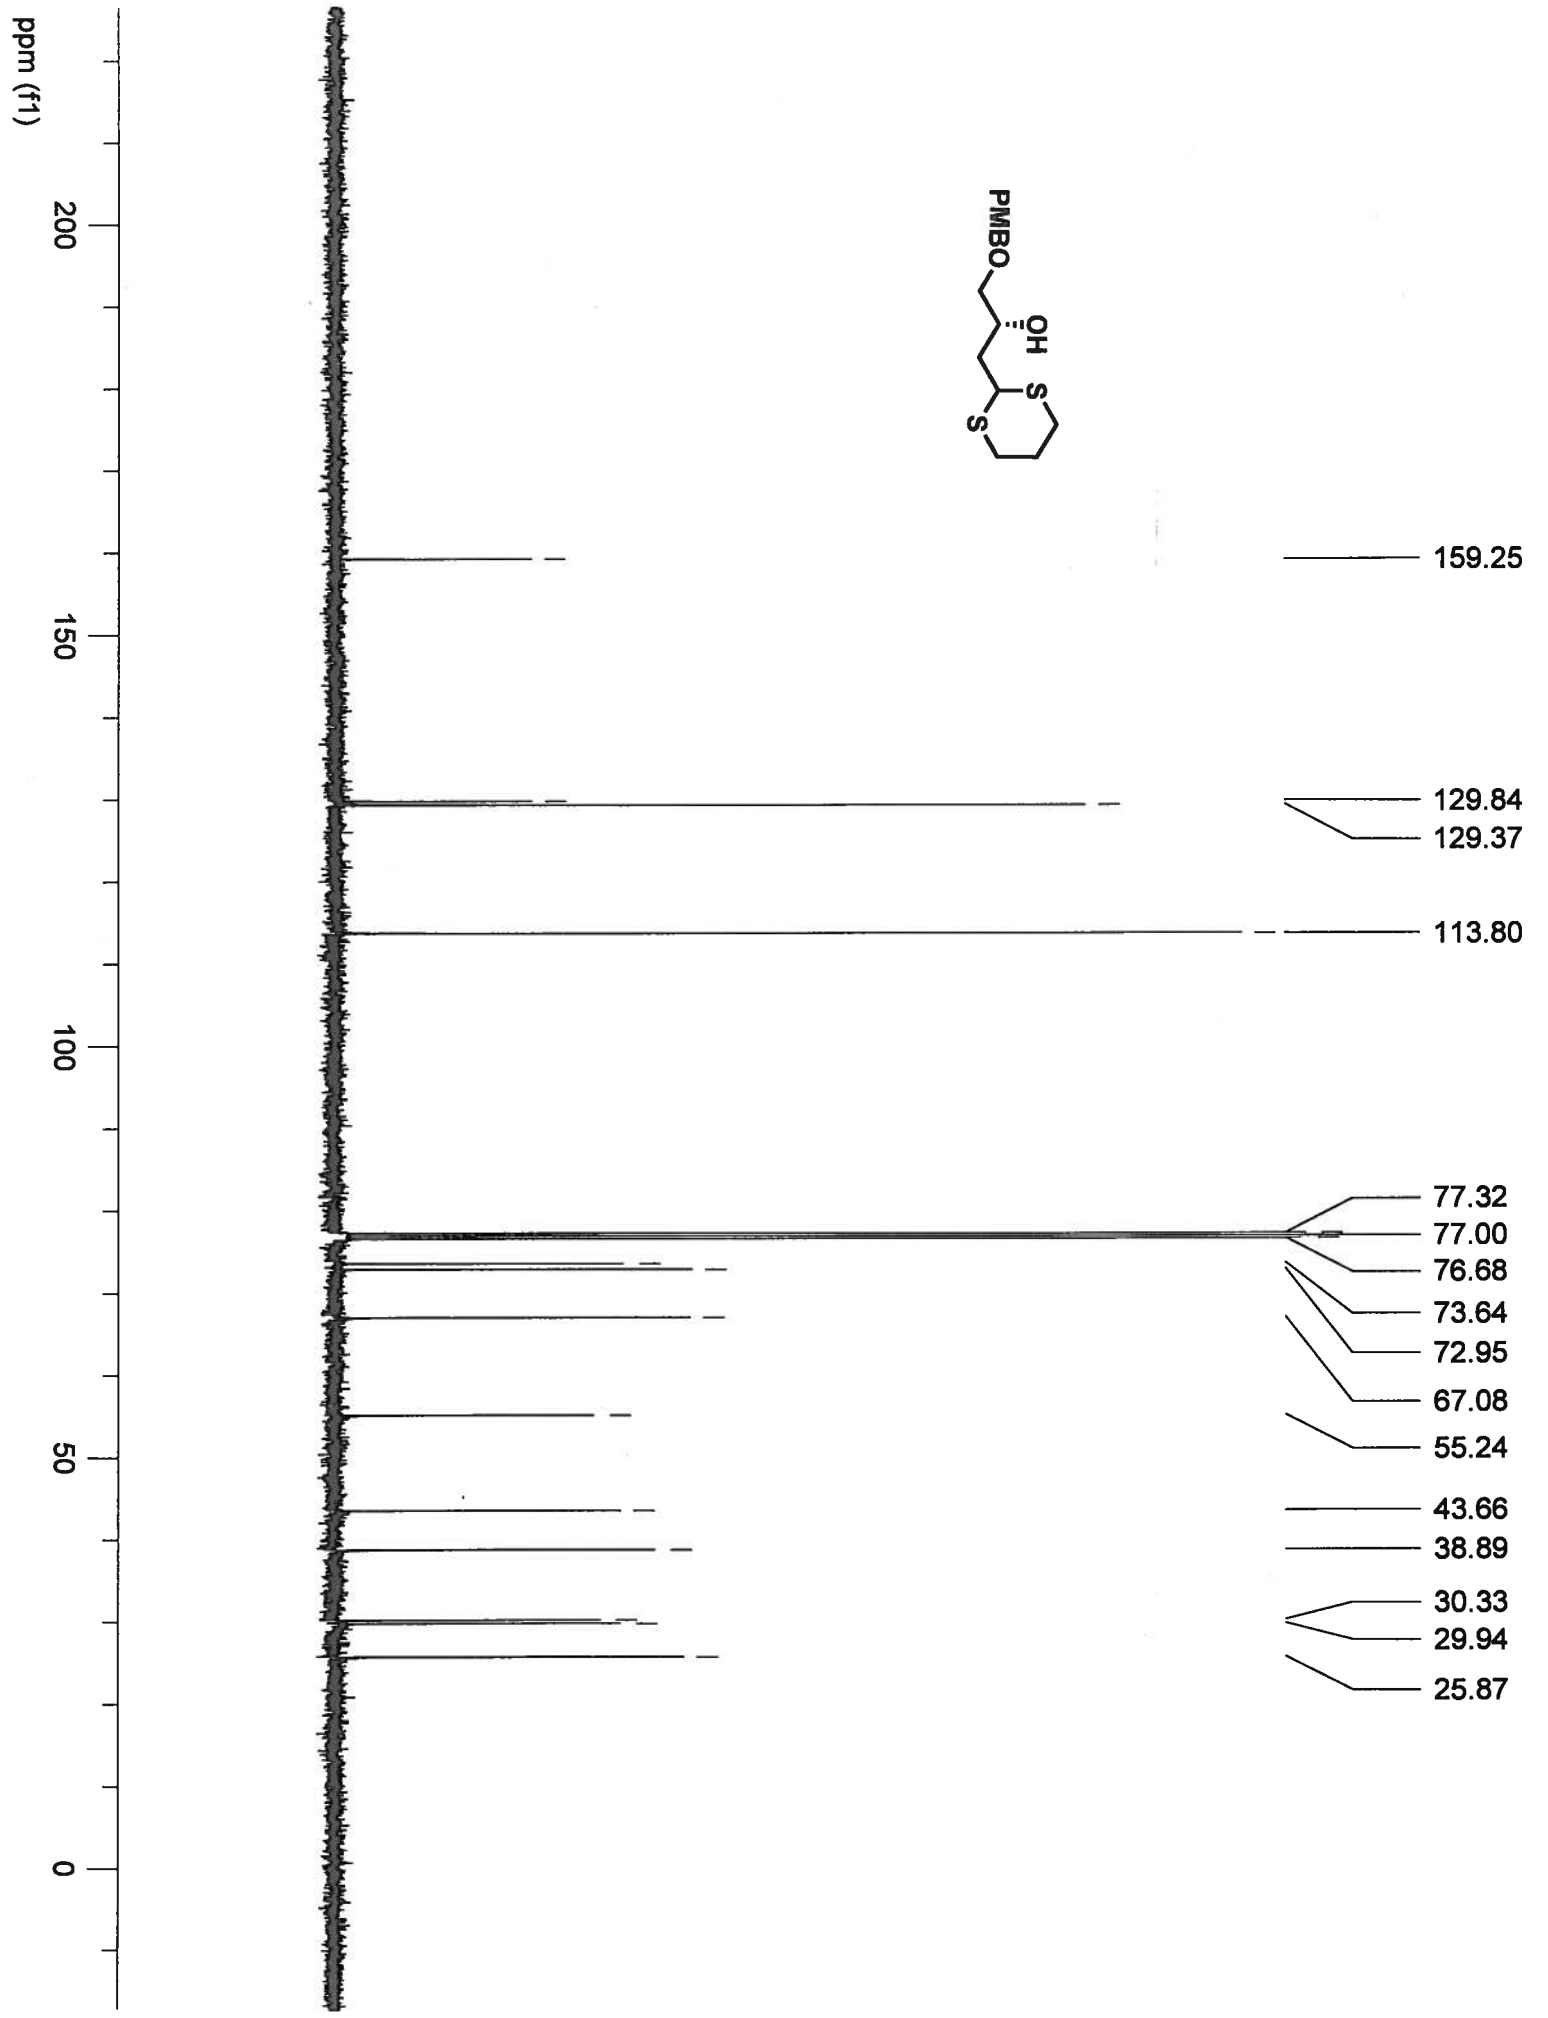

## Elemental Composition Search Report:

### Target Mass:

Target m/z = 337.0904 ± 0.002

Charge = +1

### Possible Elements:

| Element: | Exact Mass: | Min: | Max: |
|----------|-------------|------|------|
| C        | 12.000000   | 0    | 100  |
| H        | 1.007825    | 0    | 100  |
| Na       | 22.989770   | 1    | 1    |
| O        | 15.994915   | 3    | 3    |
| S        | 31.972071   | 2    | 2    |

### Additional Search Restrictions:

None

### Search Results:

Number of Hits = 1

| m/z       | Delta m/z | DBE | Formula                                                                       |
|-----------|-----------|-----|-------------------------------------------------------------------------------|
| 337.09026 | 0.00014   | 5.0 | C <sub>15</sub> H <sub>22</sub> NaO <sub>3</sub> S <sub>2</sub> <sup>+1</sup> |

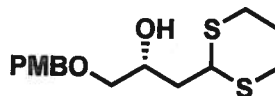

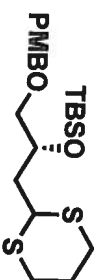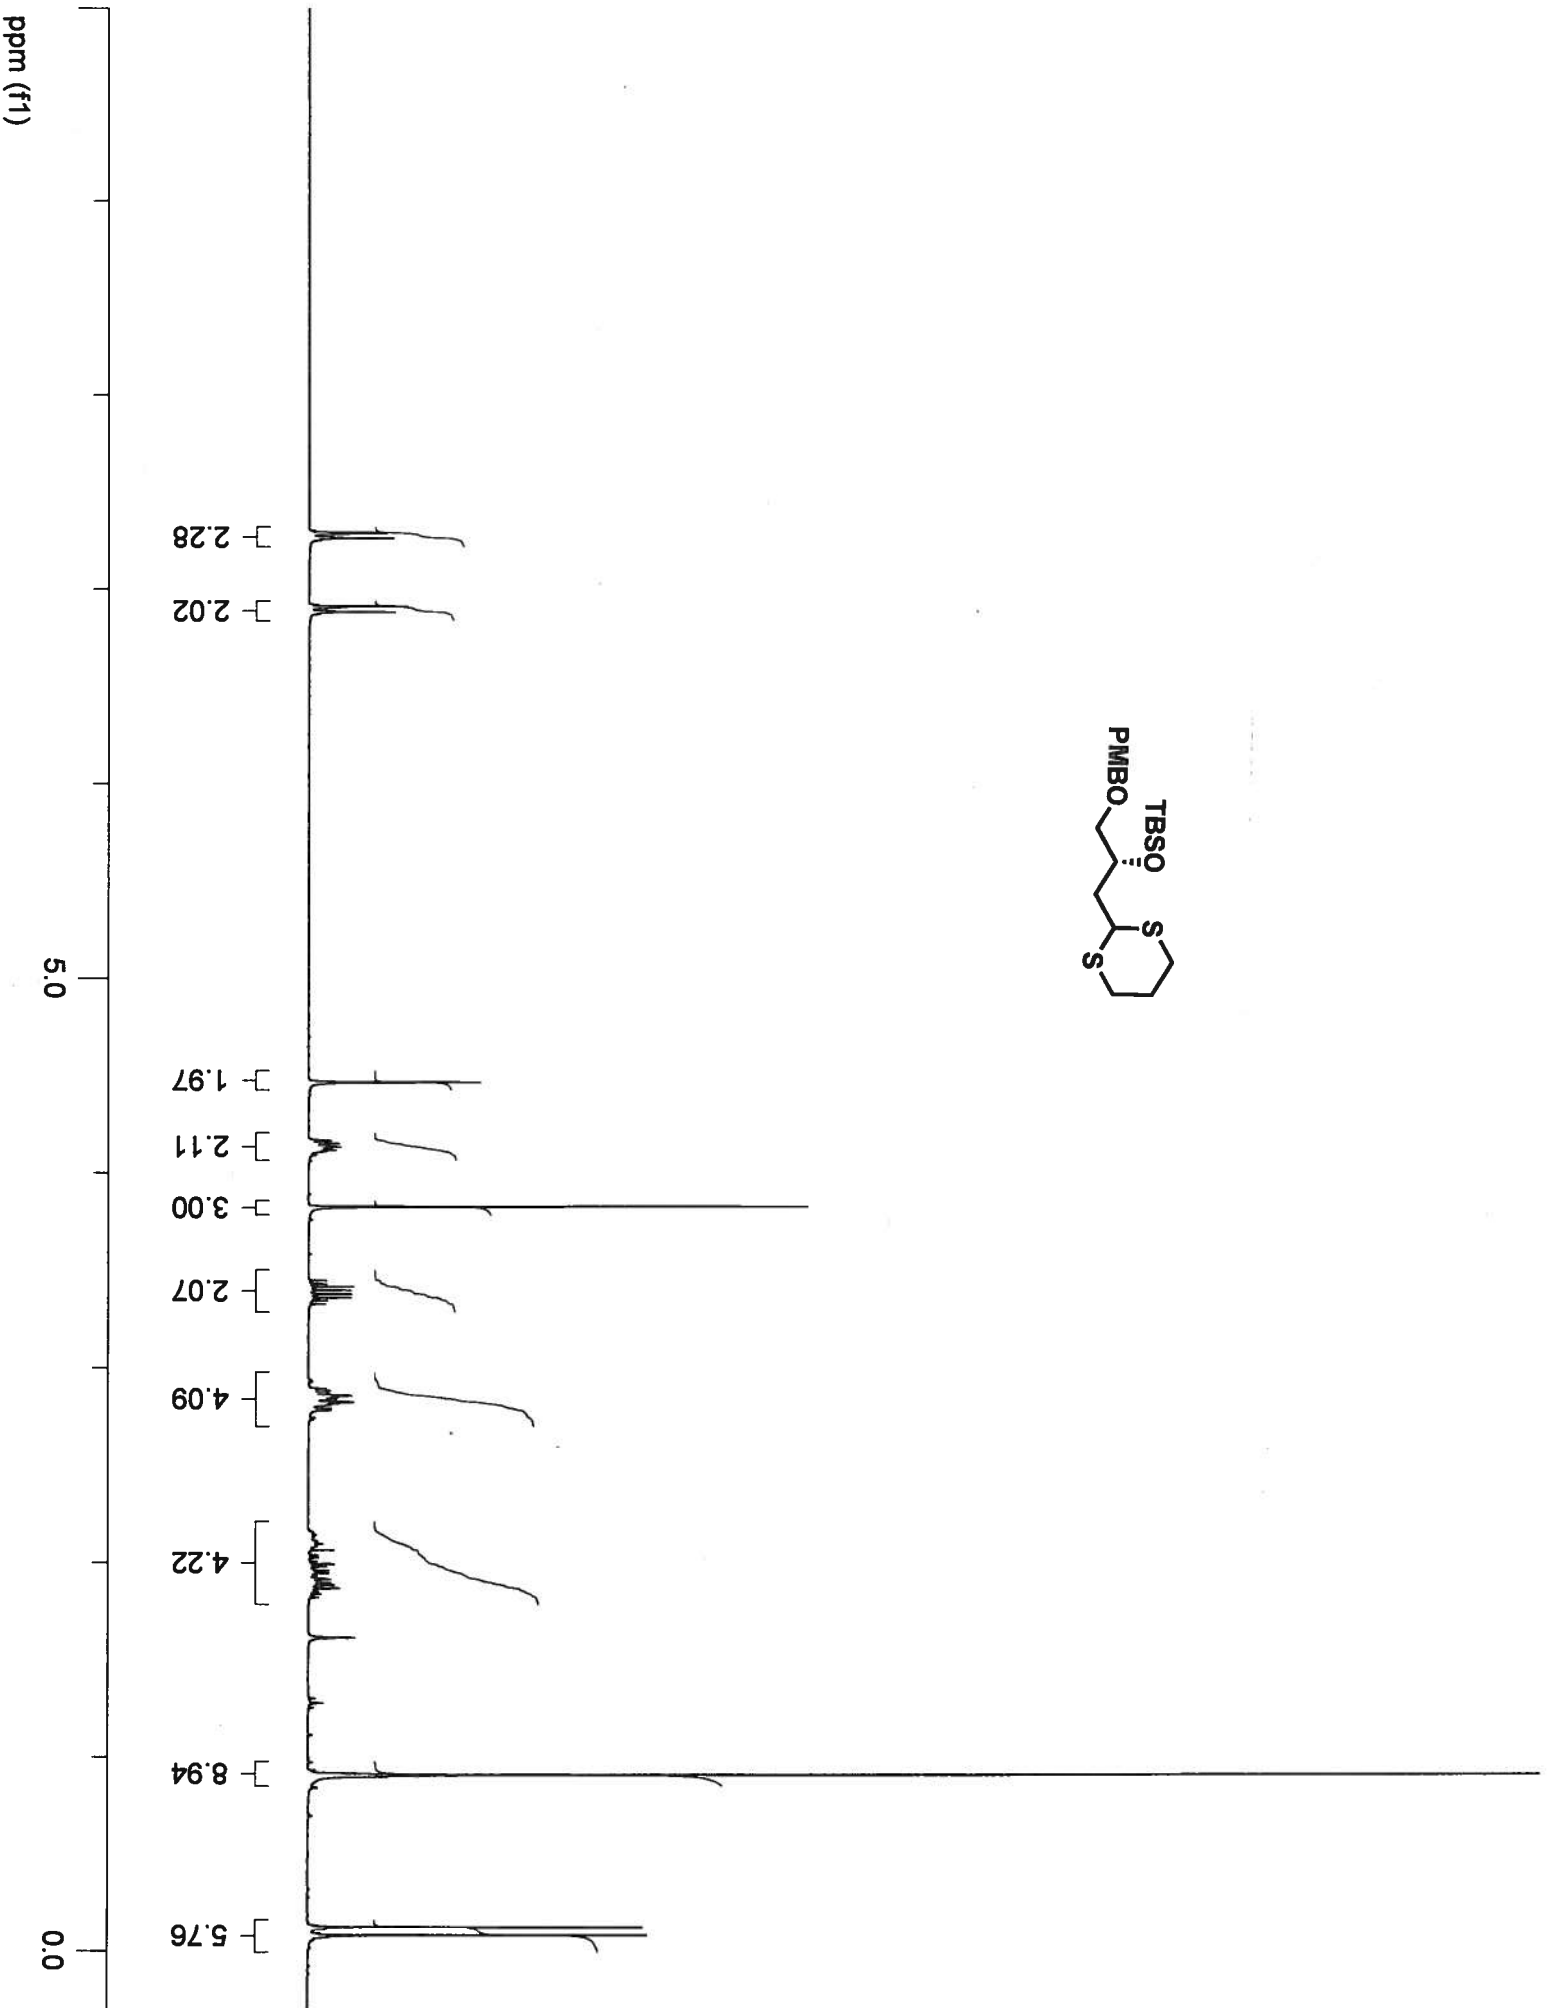

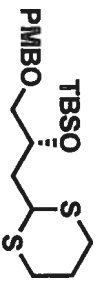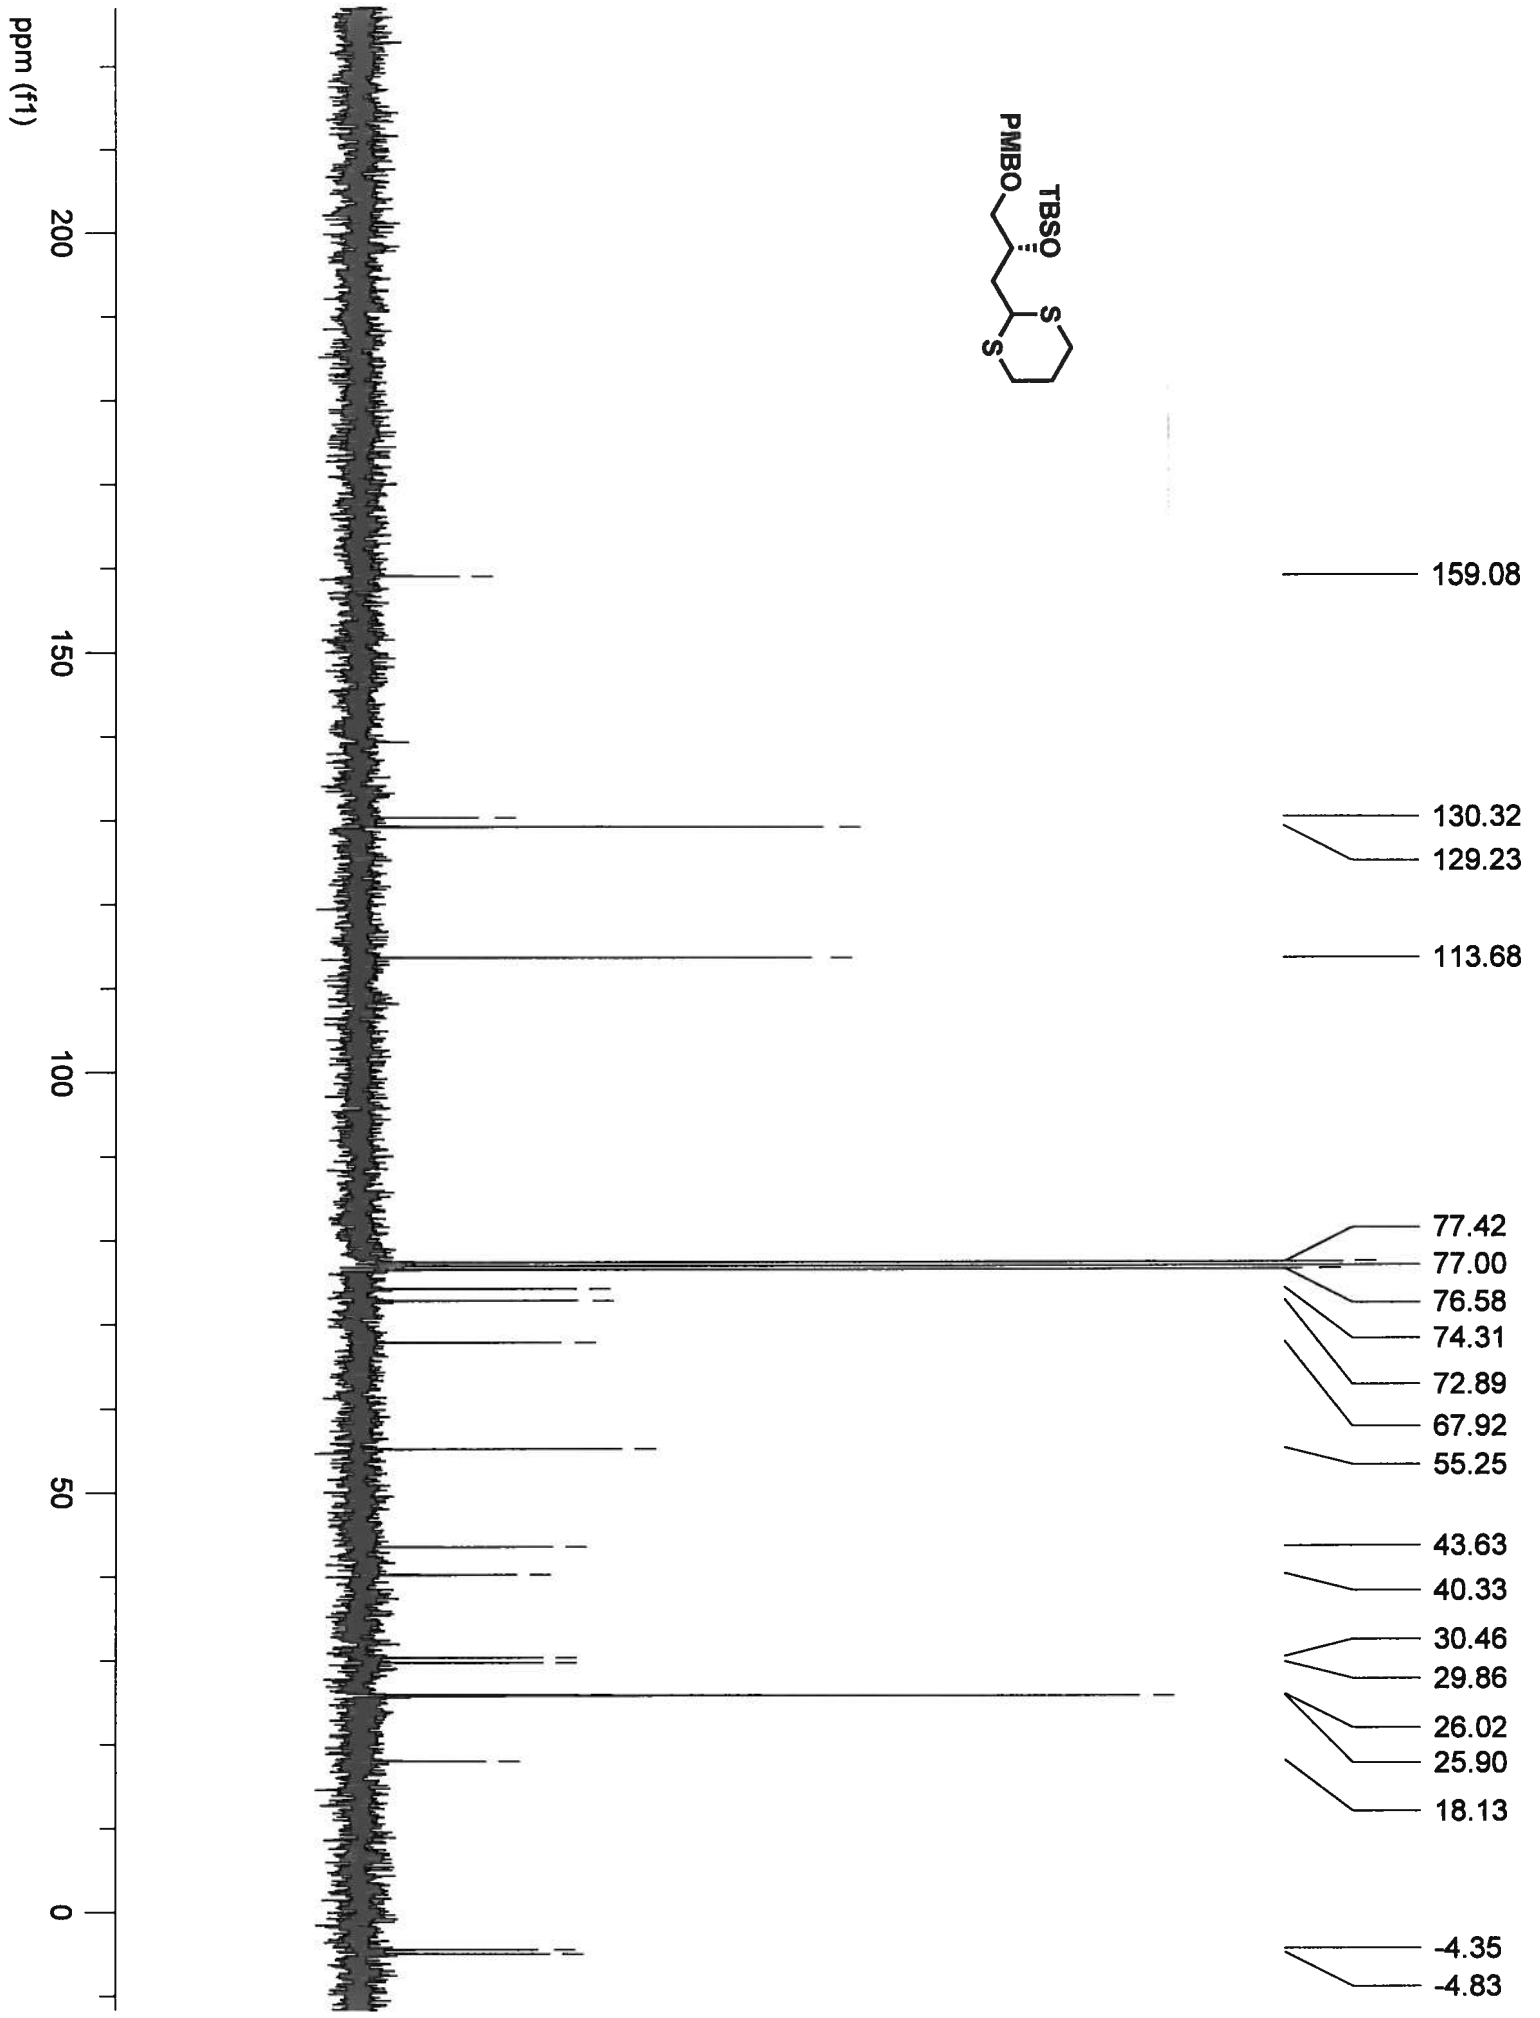

## Elemental Composition Search Report:

### Target Mass:

Target m/z = 429.1955 ± 0.002

Charge = +1

### Possible Elements:

| Element: | Exact Mass: | Min: | Max: |
|----------|-------------|------|------|
| C        | 12.000000   | 0    | 100  |
| H        | 1.007825    | 0    | 100  |
| O        | 15.994915   | 3    | 3    |
| S        | 31.972071   | 2    | 2    |
| Si       | 27.976927   | 1    | 1    |

### Additional Search Restrictions:

None

### Search Results:

Number of Hits = 1

| m/z       | Delta m/z | DBE | Formula                                                                        |
|-----------|-----------|-----|--------------------------------------------------------------------------------|
| 429.19479 | 0.00071   | 4.5 | C <sub>21</sub> H <sub>37</sub> O <sub>3</sub> S <sub>2</sub> Si <sup>+1</sup> |

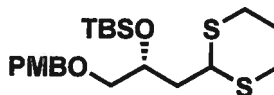

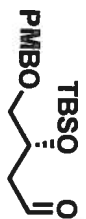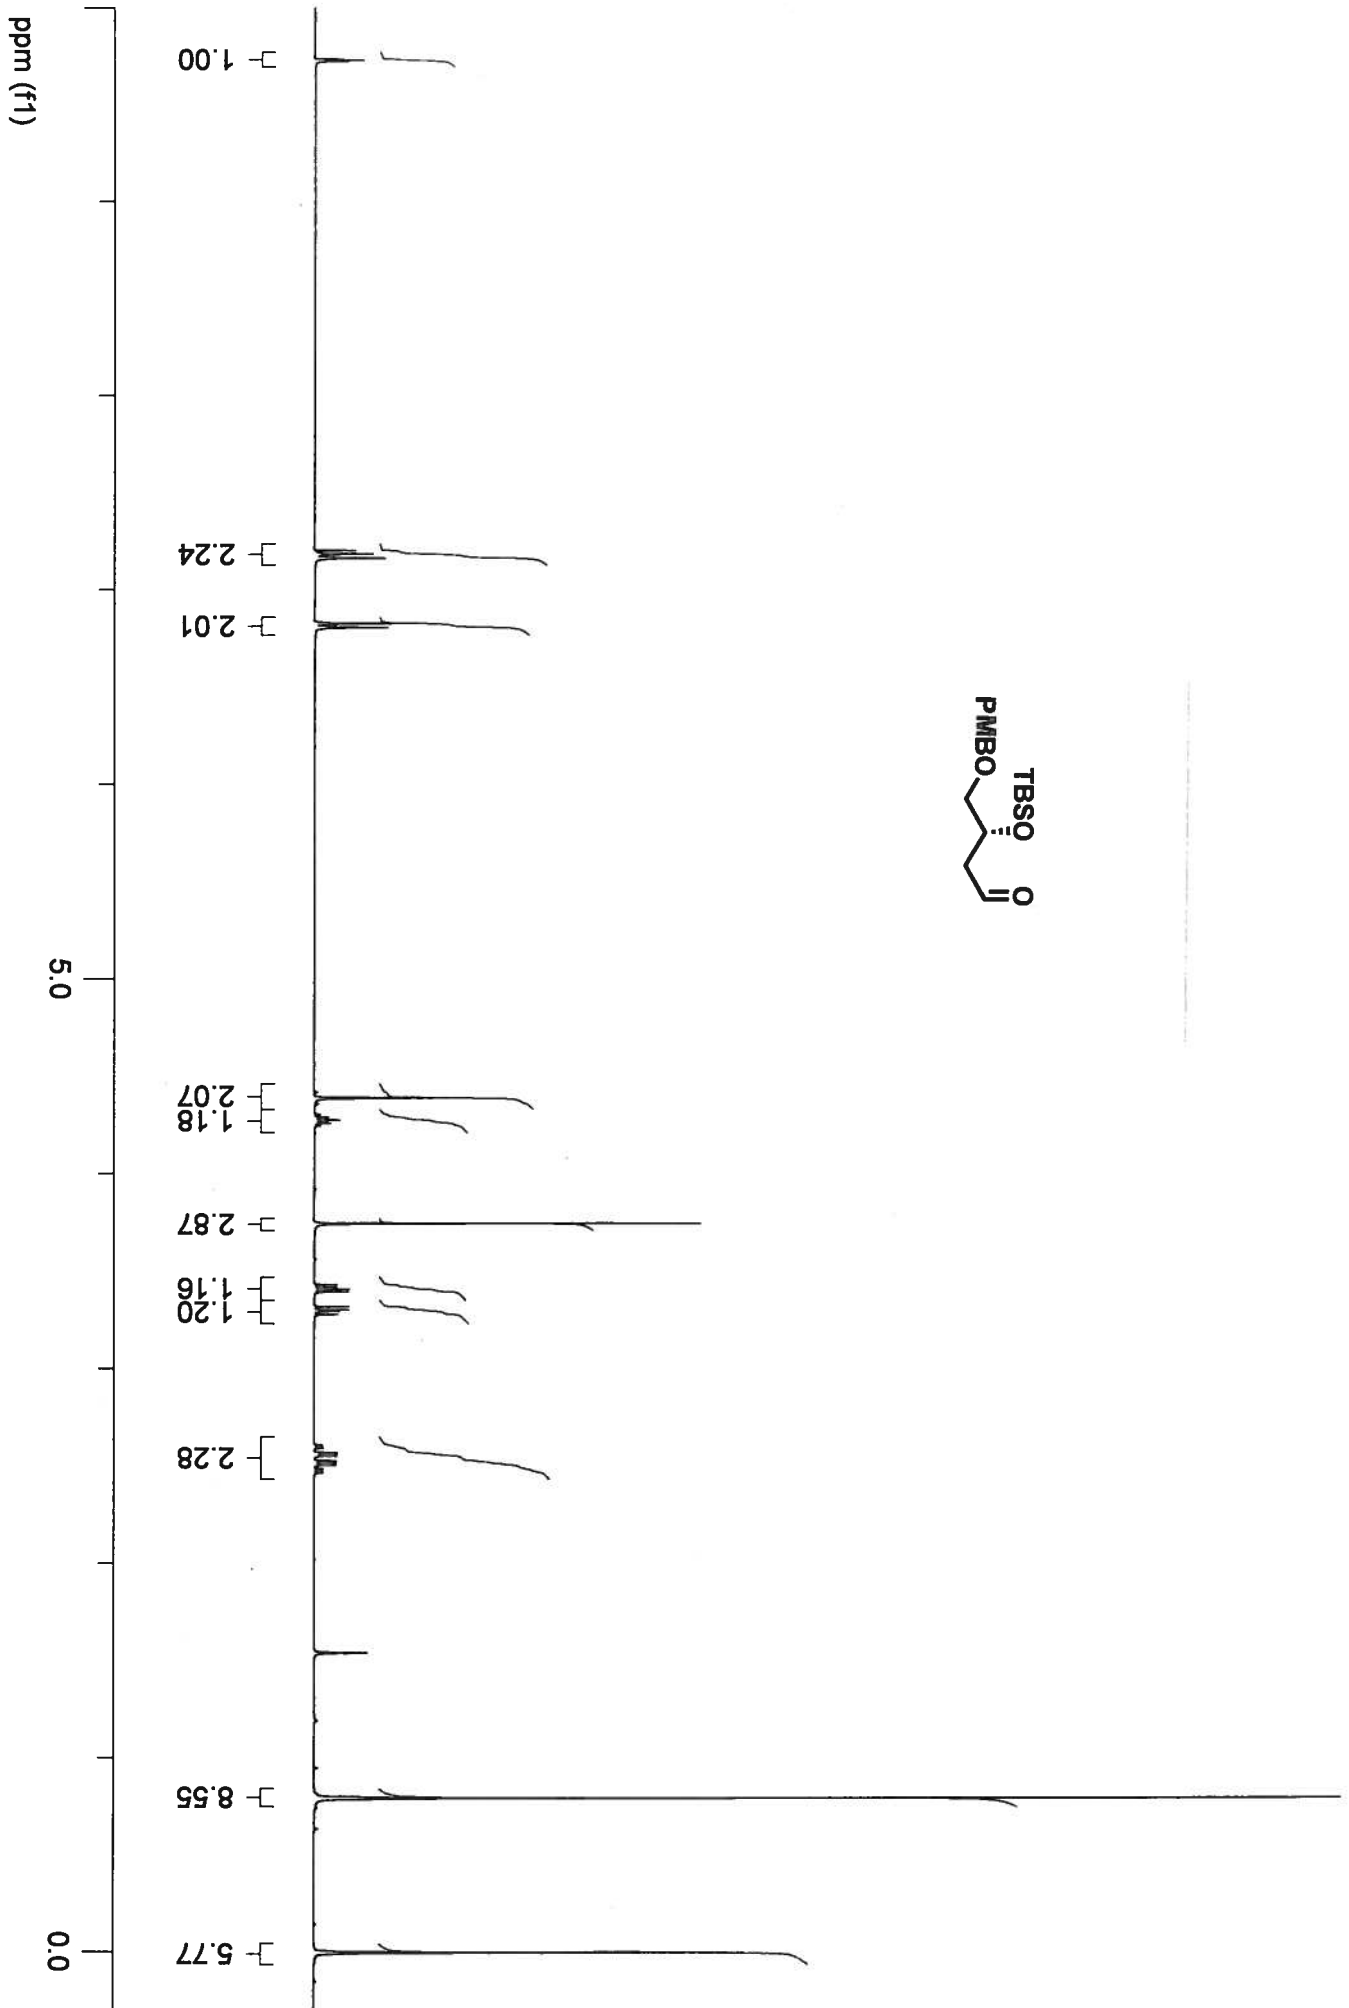



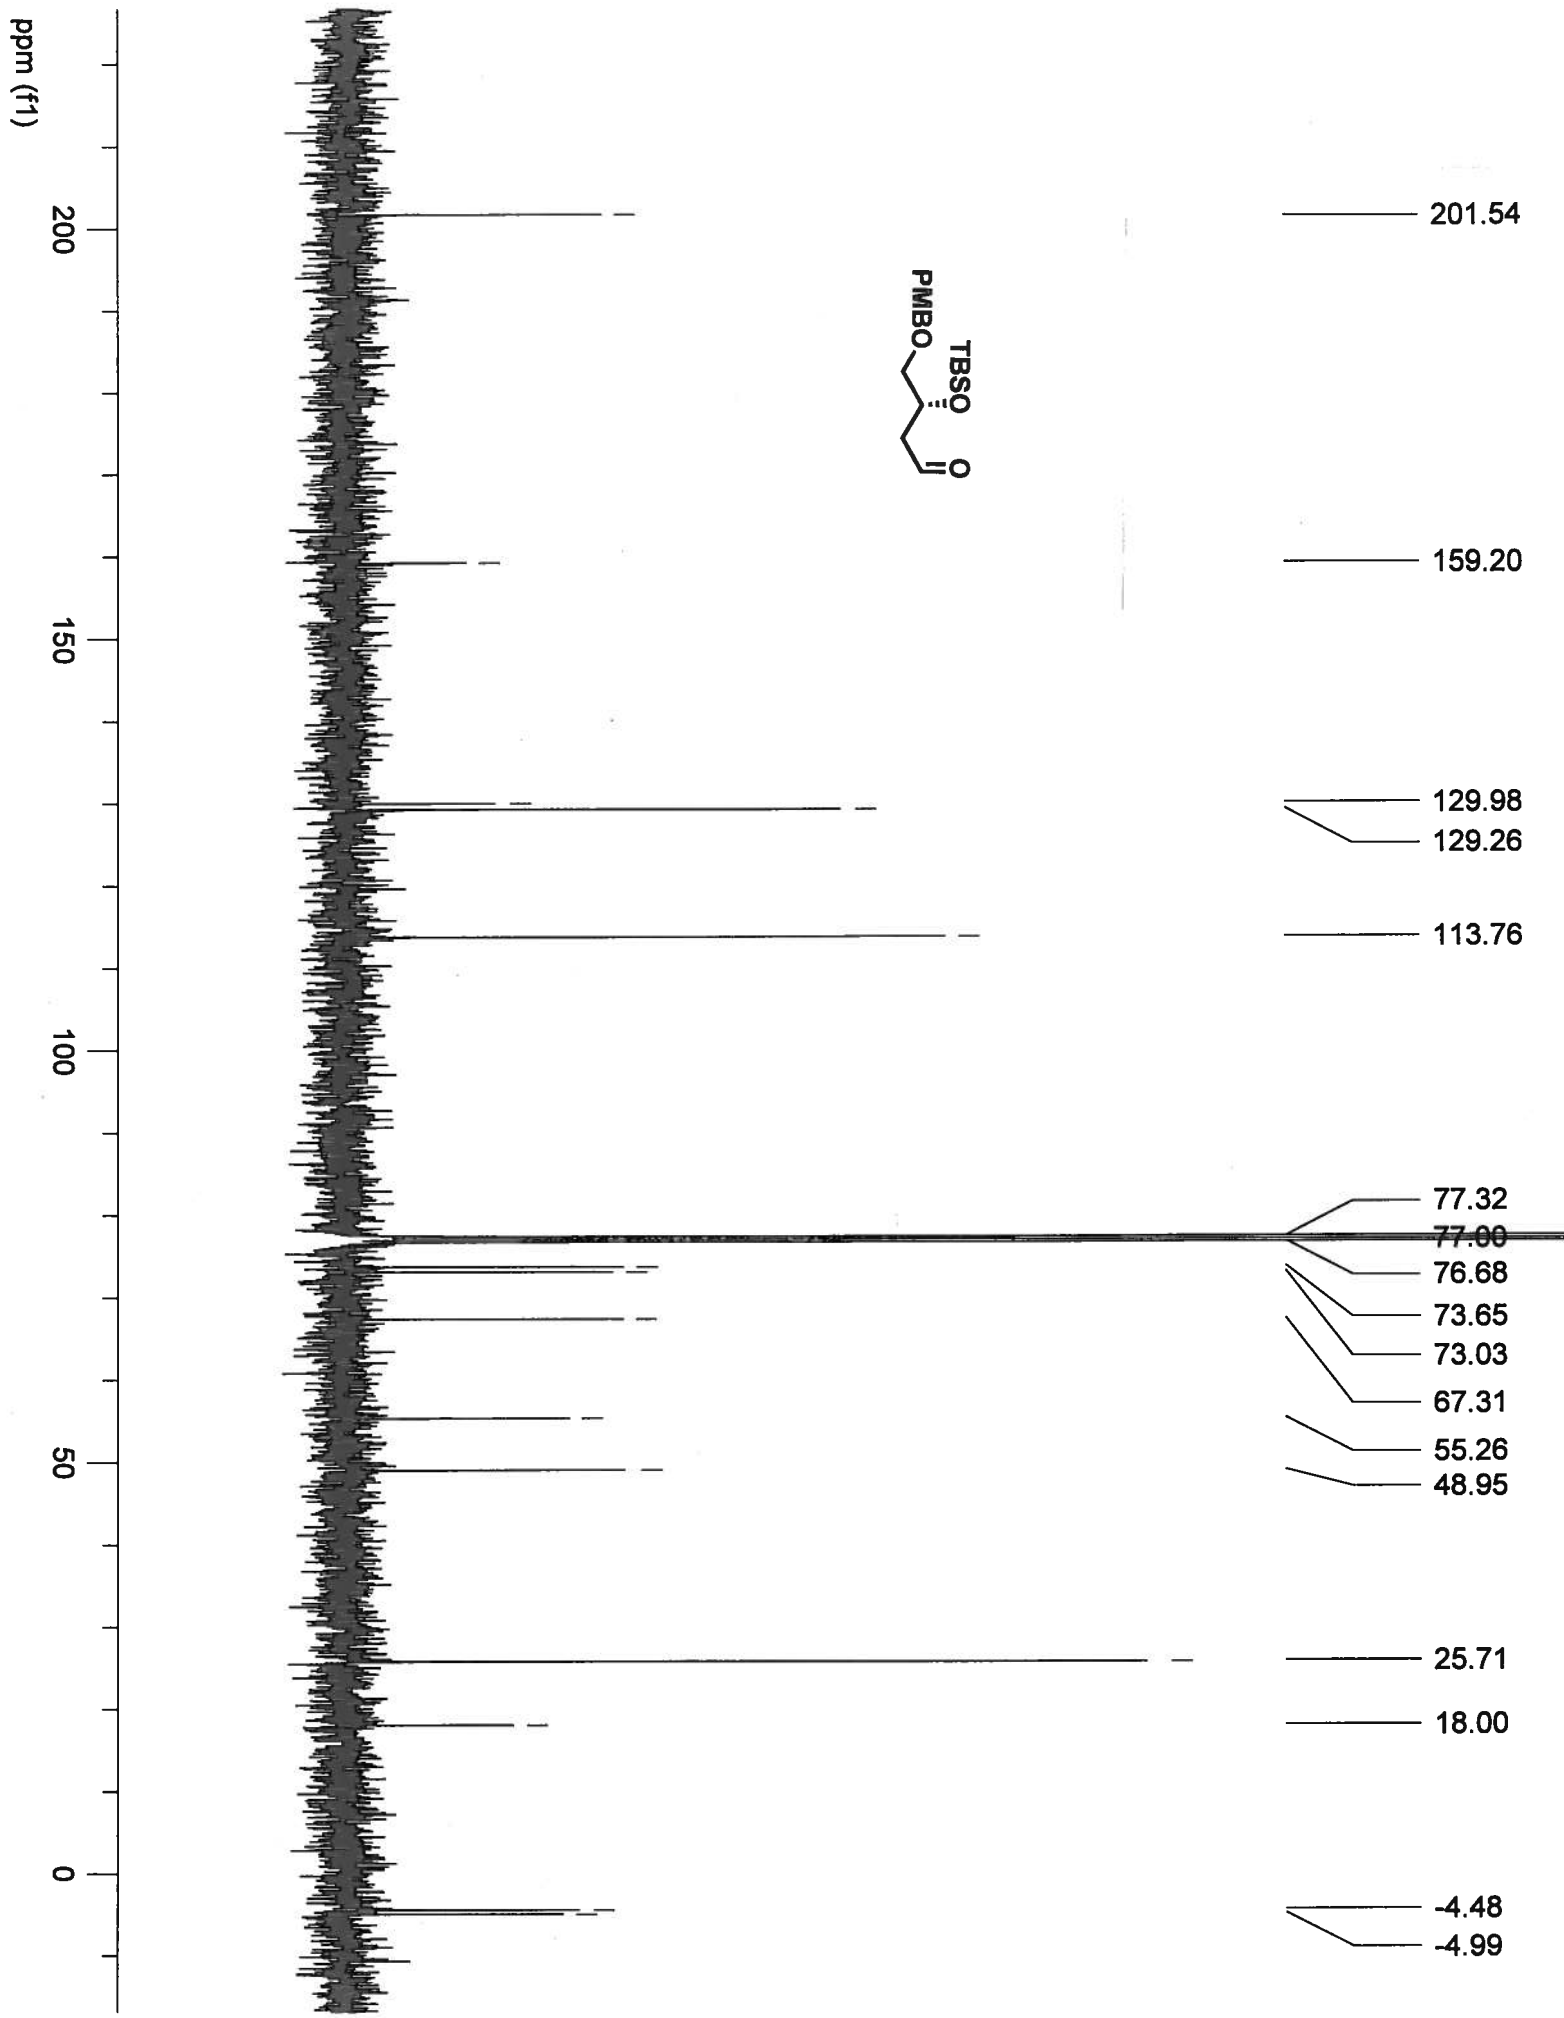

# Target Compound Screening Report

**Data File** MSF14-2340(BSJ-5-047)\_hrESIpos5.d **Sample Name** 2340(BSJ-5-047)  
**Position** P1-A3 **Instrument Name** Instrument 1 **User Name**  
**Acq Method** pos.m **Acquired Time** 7/21/2014 4:47:02 PM **DA Method** Ian.m **Comment** 2340(BSJ-5-047)

MS Zoomed Spectrum

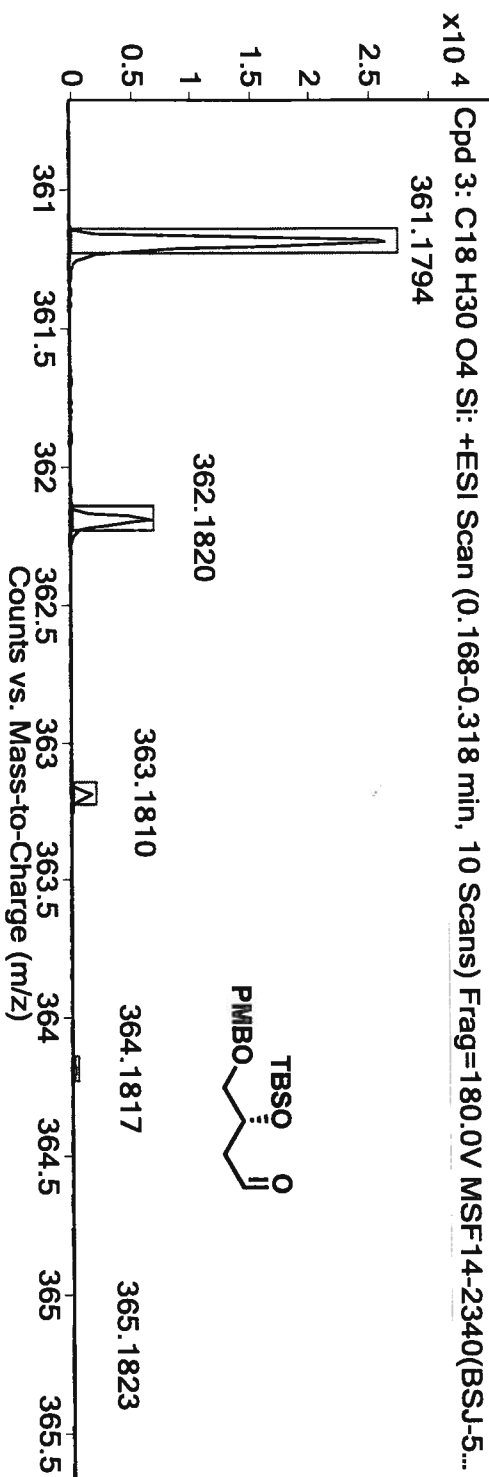

| Obs. m/z  | Calc. m/z | Charge | Abund     | Formula    | Ion/Isotope | Tgt Mass Error (ppm) |
|-----------|-----------|--------|-----------|------------|-------------|----------------------|
| 361.17940 | 361.18060 | 1      | 27353.18  | C18H30O4Si | (M+Na)+     | 3.18                 |
| 362.18200 | 362.18320 | 1      | 6789.95   | C18H30O4Si | (M+Na)+     | 3.18                 |
| 363.18100 | 363.18180 | 1      | 1710.78   | C18H30O4Si | (M+Na)+     | 2.21                 |
| 364.18170 | 364.18370 | 1      | 353.58    | C18H30O4Si | (M+Na)+     | 5.48                 |
| 365.18230 | 365.18550 | 1      | 41.43     | C18H30O4Si | (M+Na)+     | 8.81                 |
| 393.20600 |           |        | 227713.97 |            |             |                      |

--- End Of Report ---

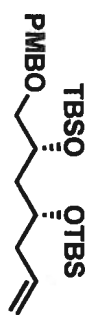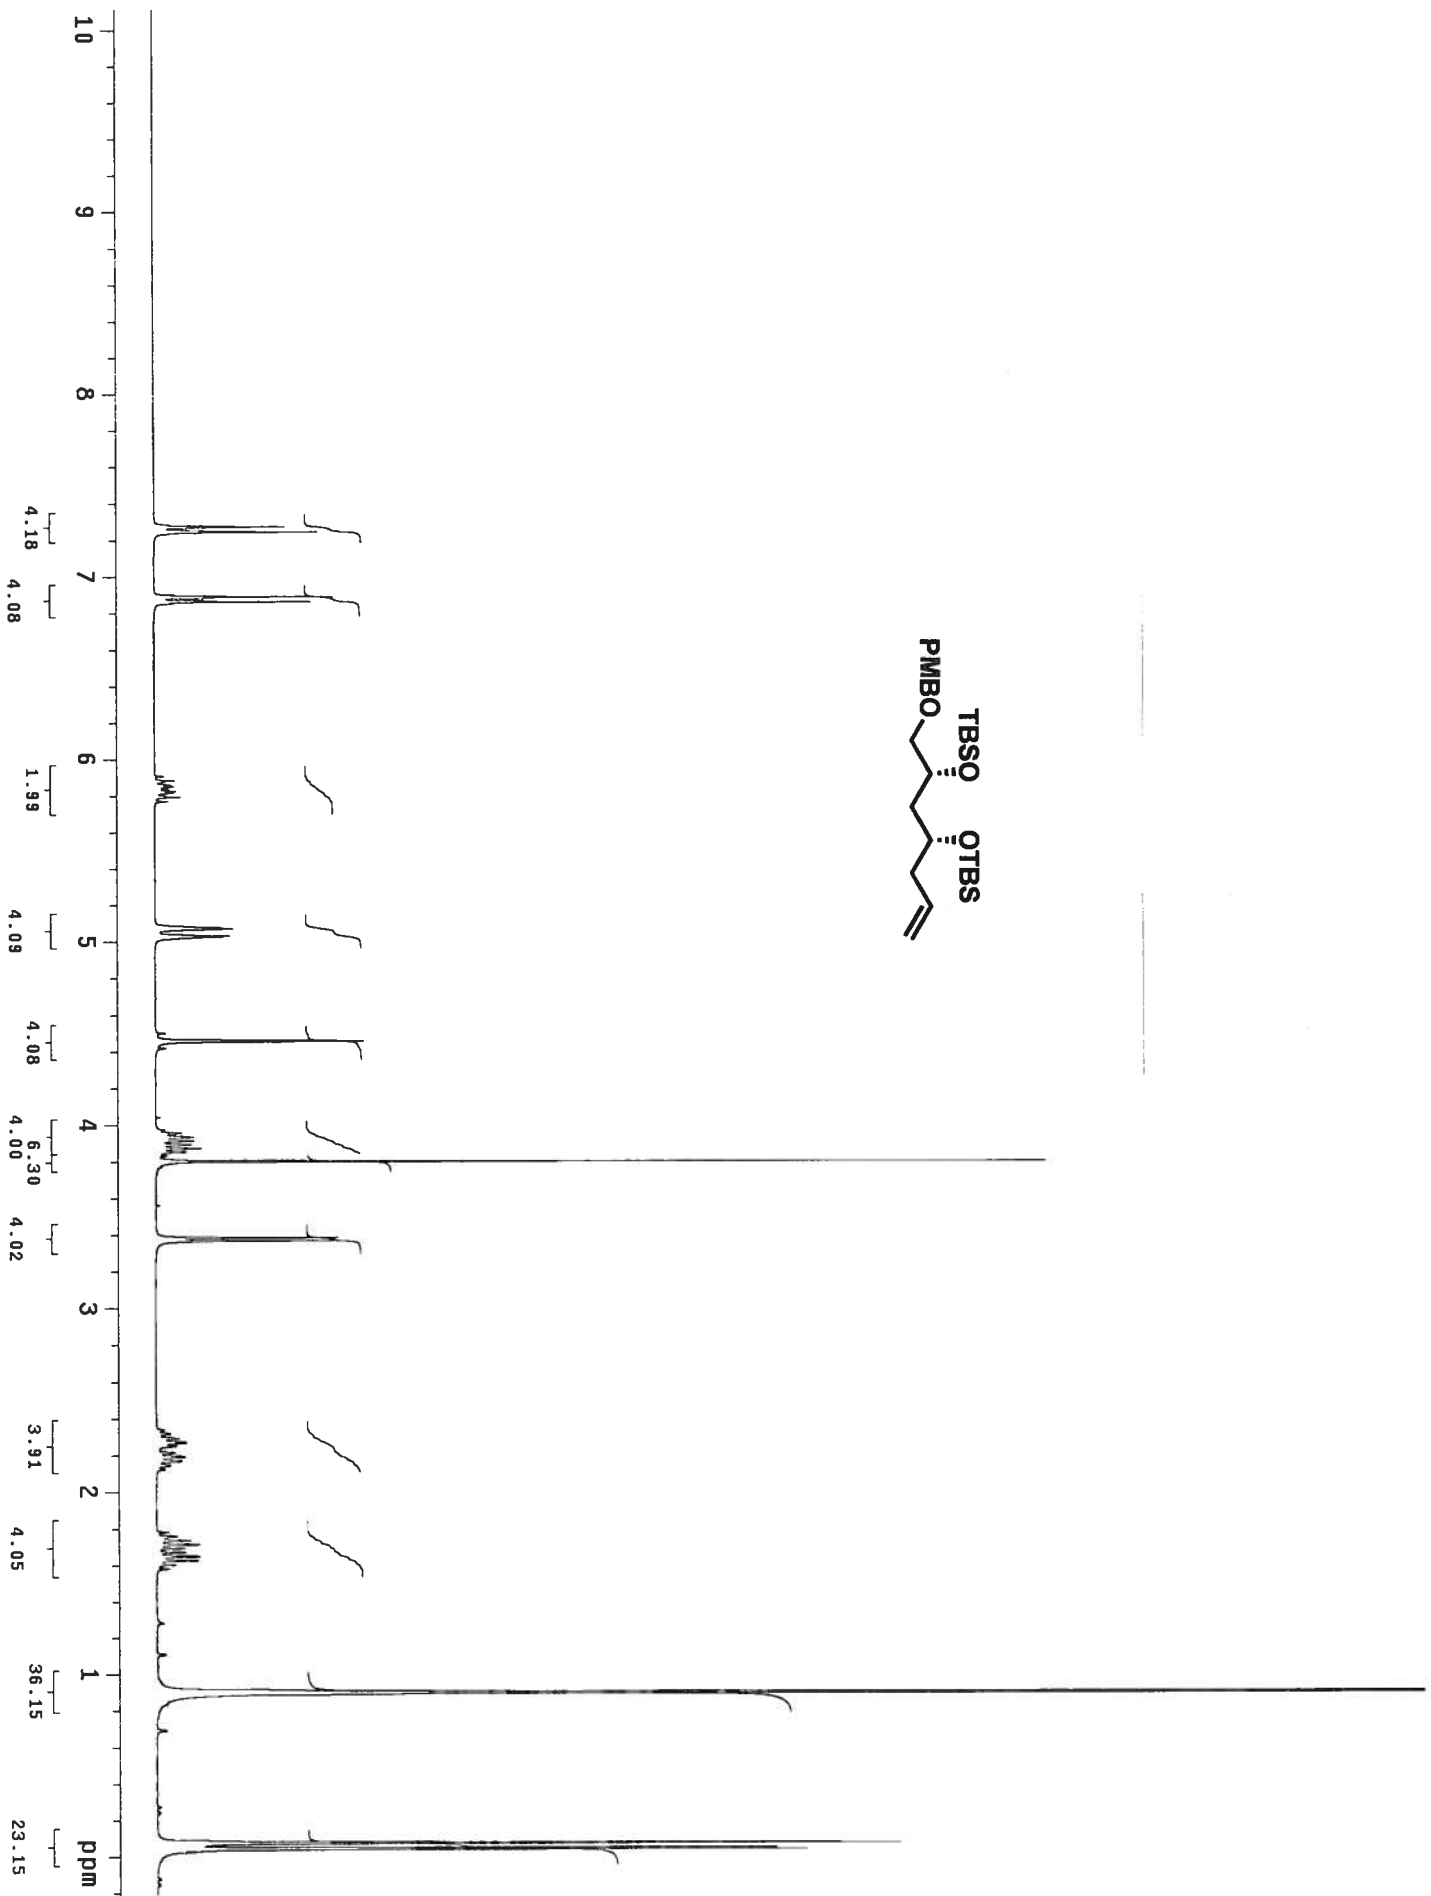

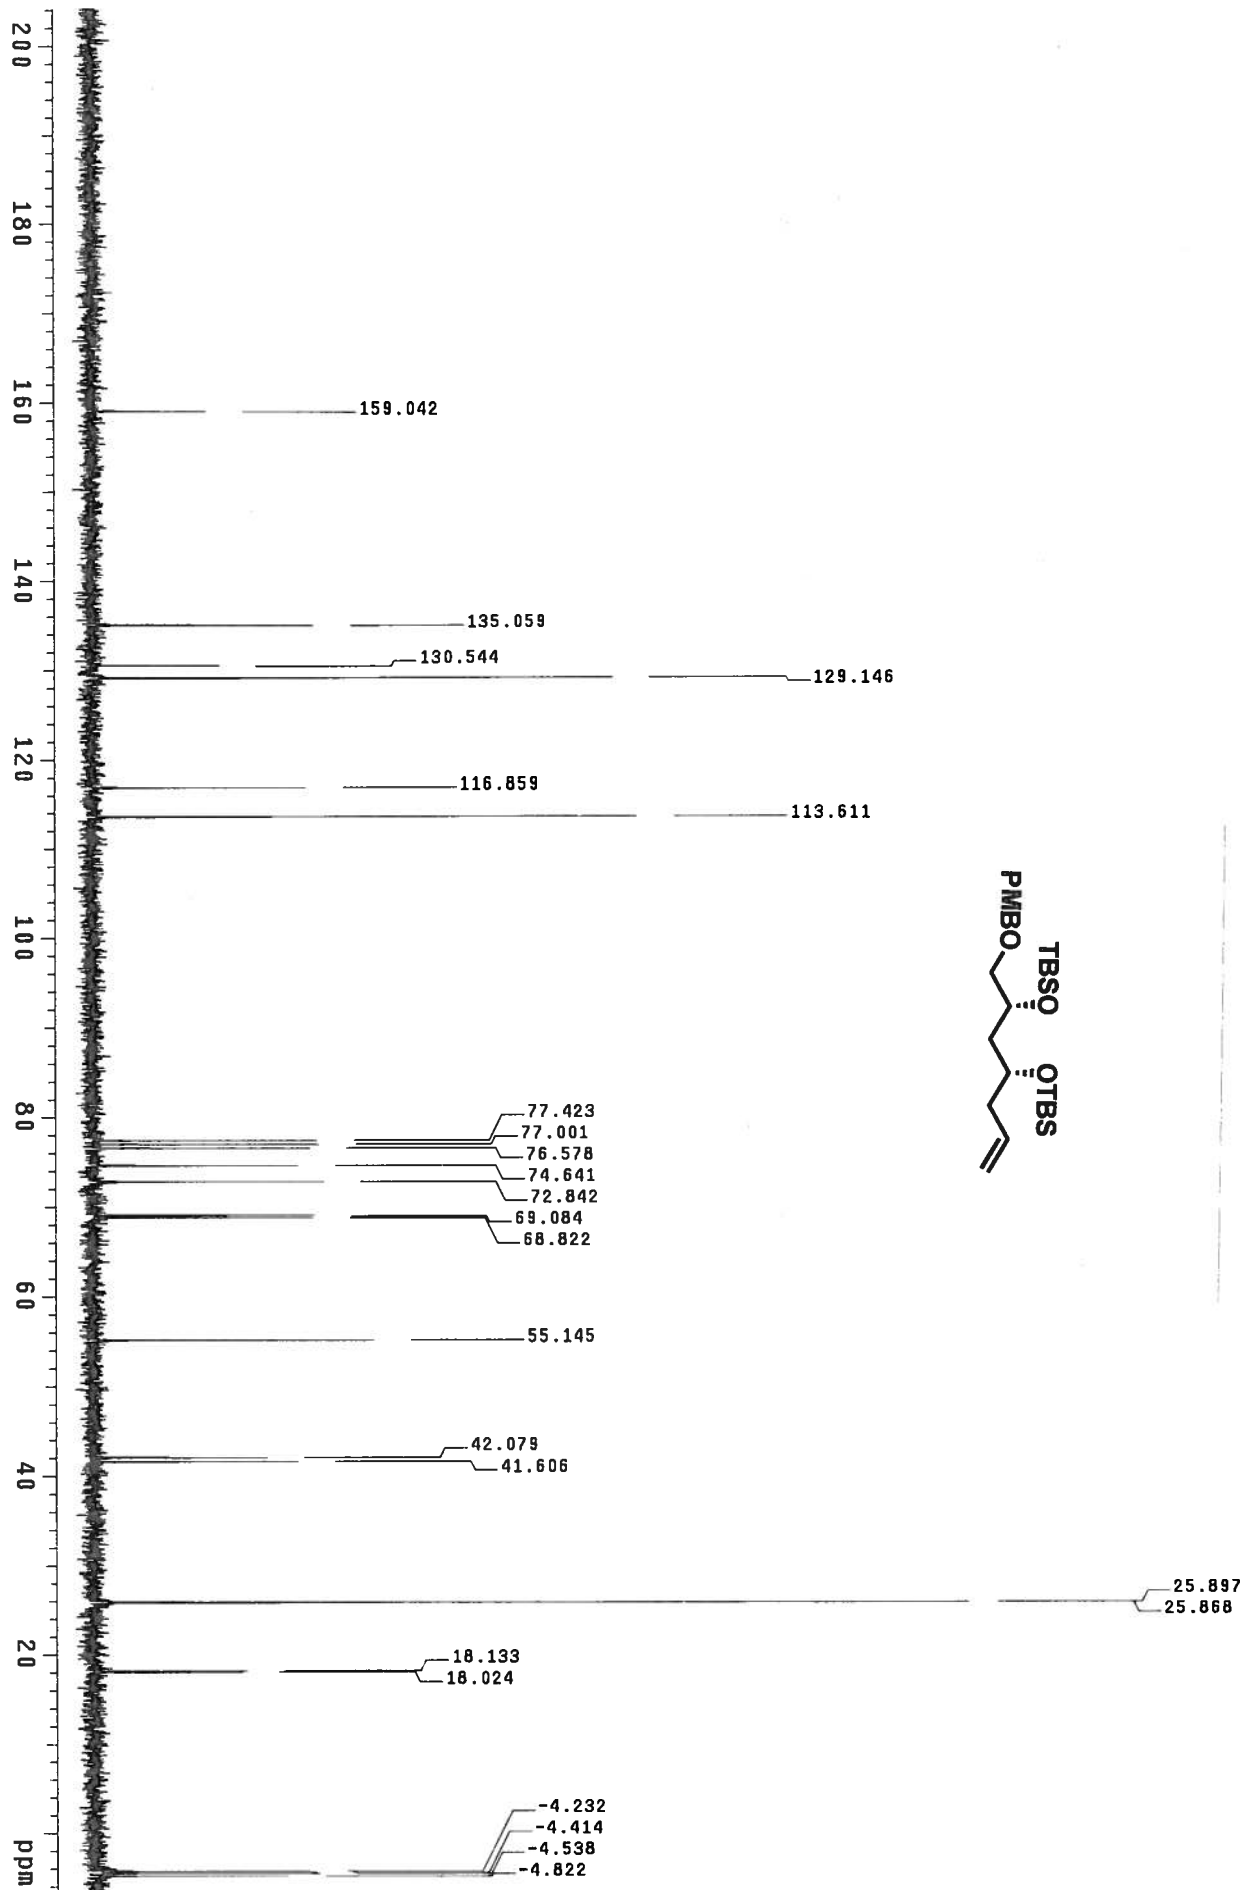

Elemental Composition

Date : 12-OCT-2004

File:O12LU3699 Ident:1\_5 SMO(1,7) PKD(7,3,7,0.50%,80.0,80.00%,F,F)  
ZAB-E4F CI+ Voltage BpI:936128 TIC:35355800 Flags:NORM DEL ERR  
File Text:QINGQUAN WU / WQQ-03699  
Heteroatom Max: 20 Ion: Both Even and Odd  
Limits:

|             |            |            |                   |            |          |          |          |           |
|-------------|------------|------------|-------------------|------------|----------|----------|----------|-----------|
| 493.314893  |            | 5.0        |                   | -0.5       | 0        | 0        | 0        | 0         |
|             |            |            |                   | 10.0       | 200      | 400      | 4        | 2         |
| <b>Mass</b> | <b>mDa</b> | <b>PPM</b> | <b>Calc. Mass</b> | <b>DBE</b> | <b>C</b> | <b>H</b> | <b>O</b> | <b>Si</b> |
| 493.314893  | 2.0        | 4.2        | 493.316942        | 5.5        | 27       | 49       | 4        | 2         |

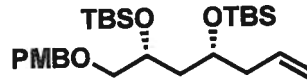

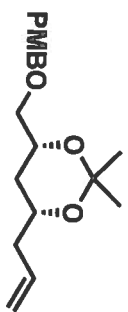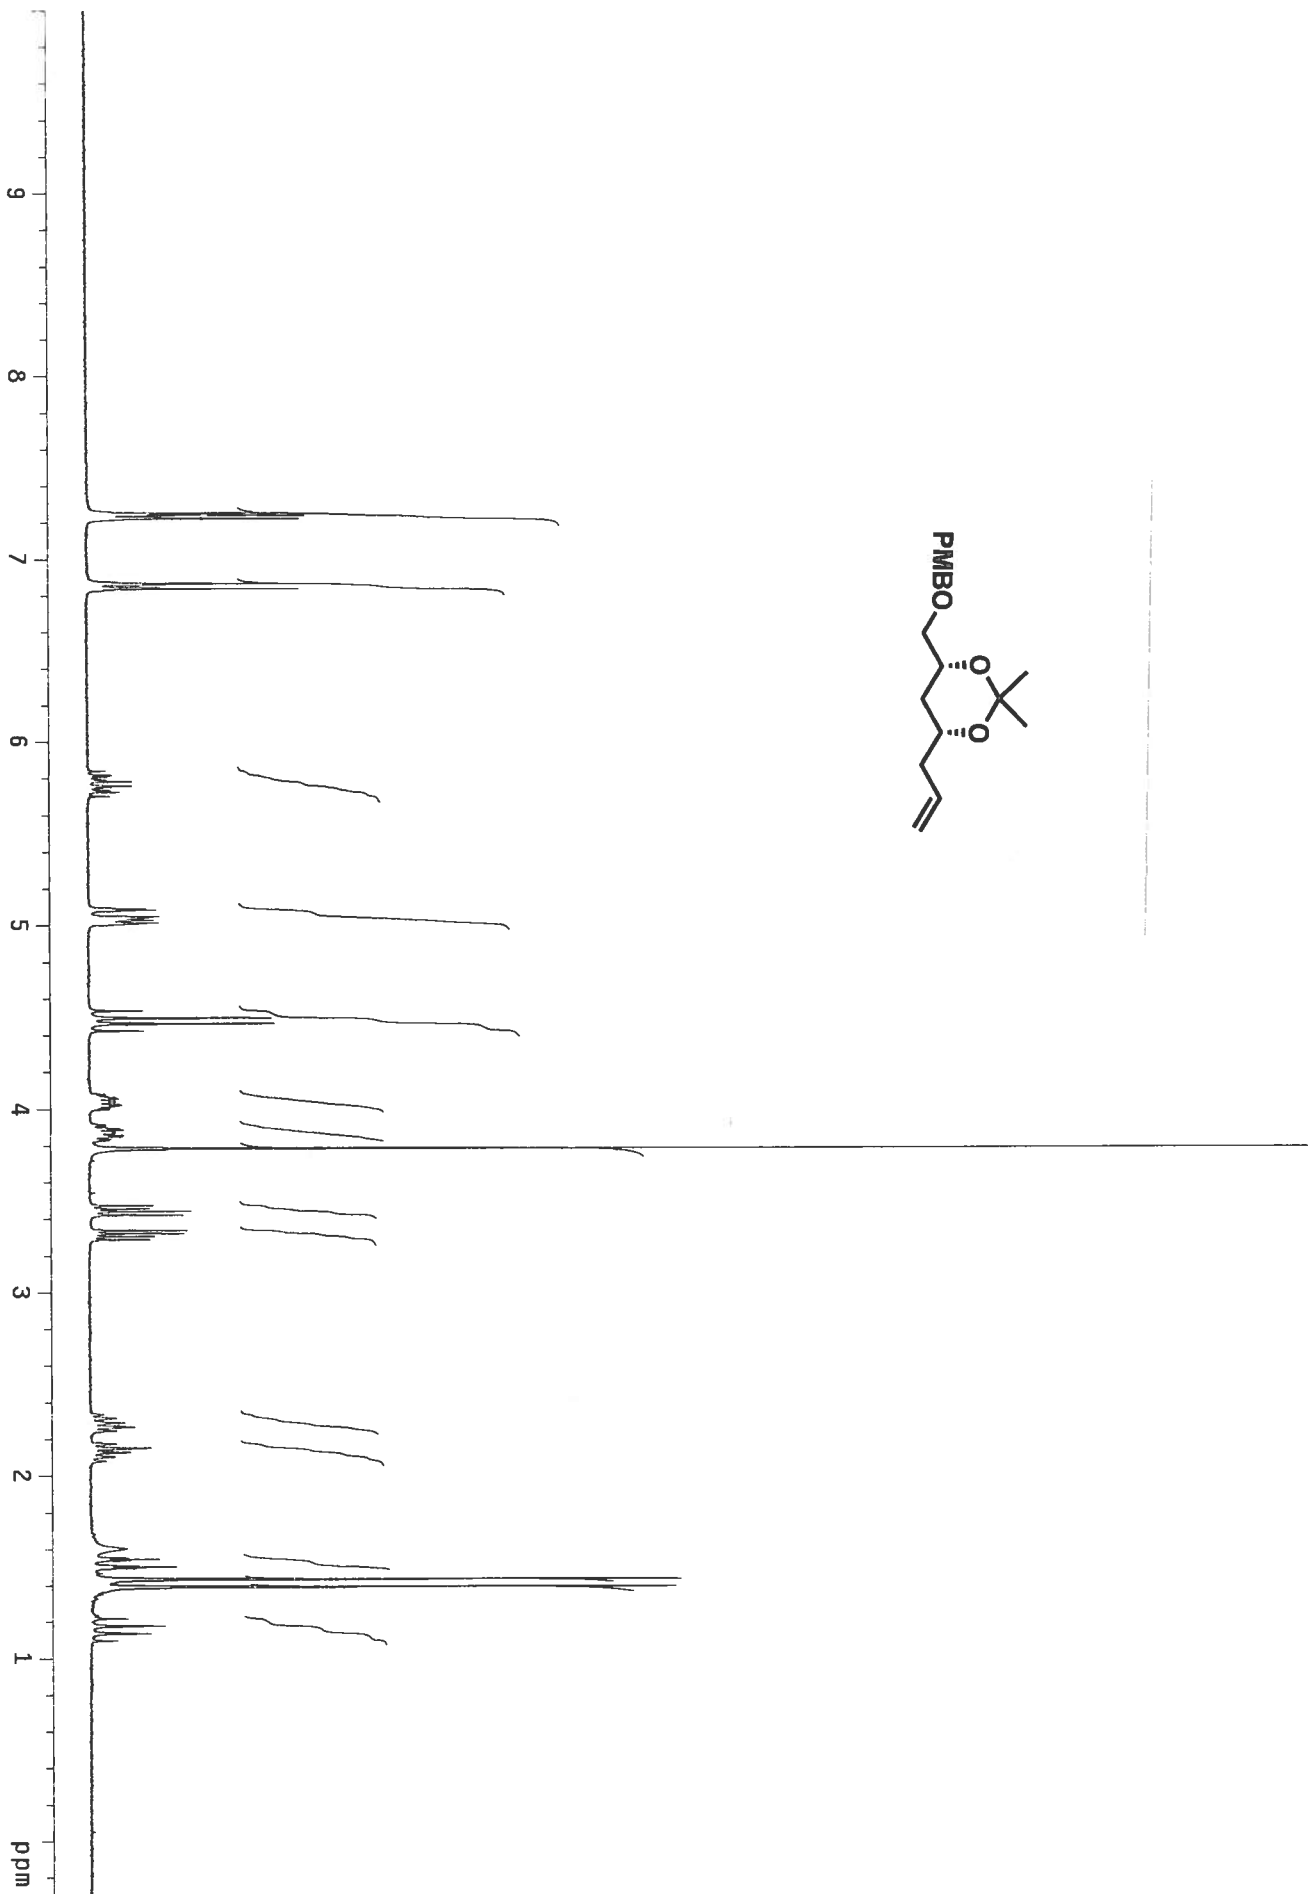

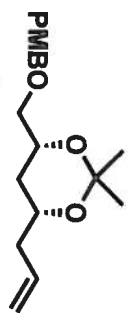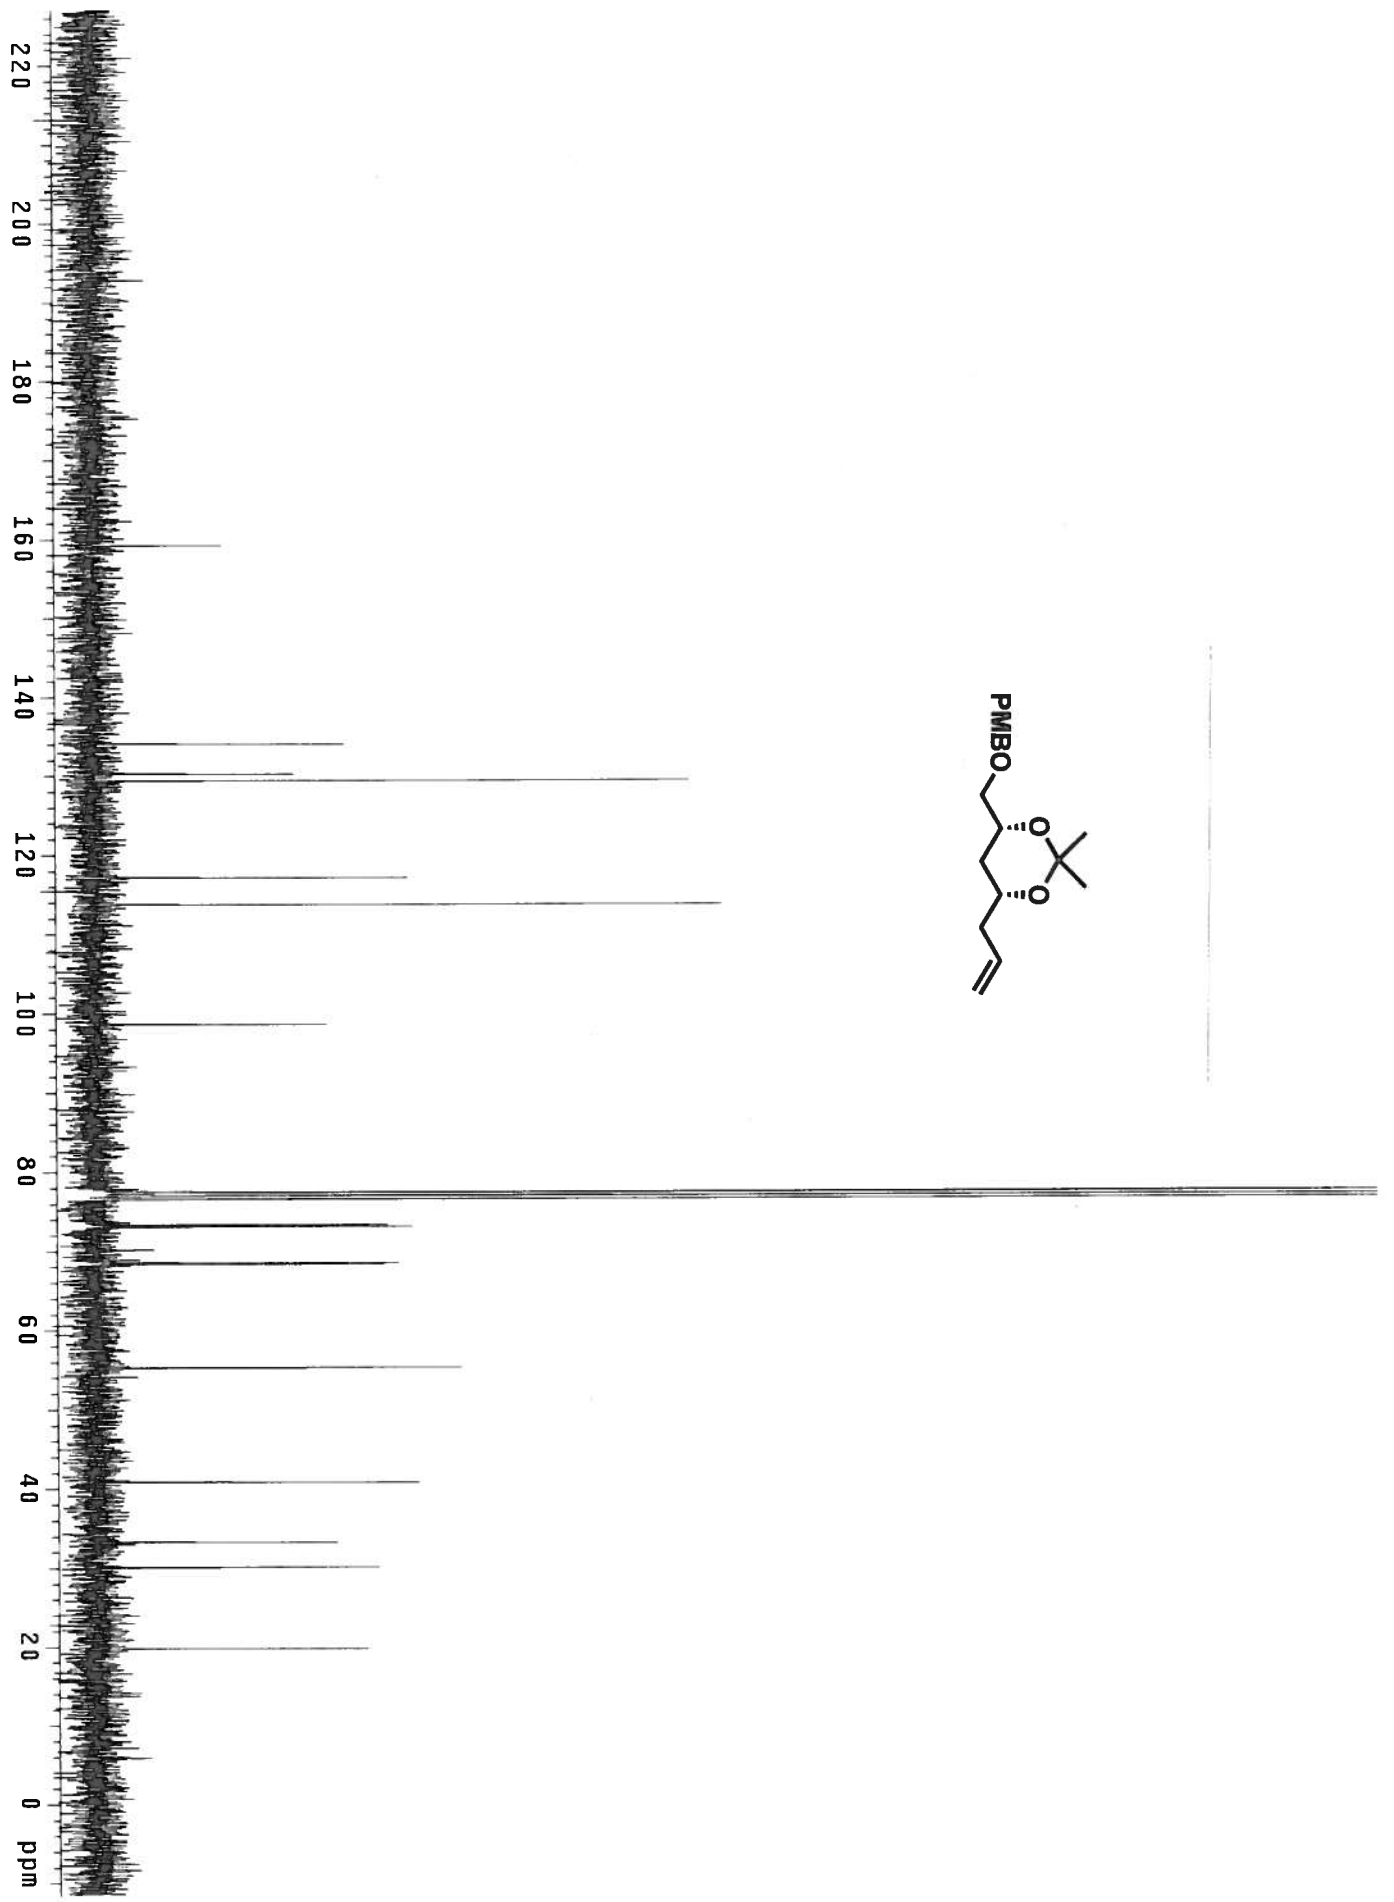

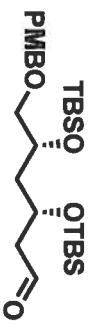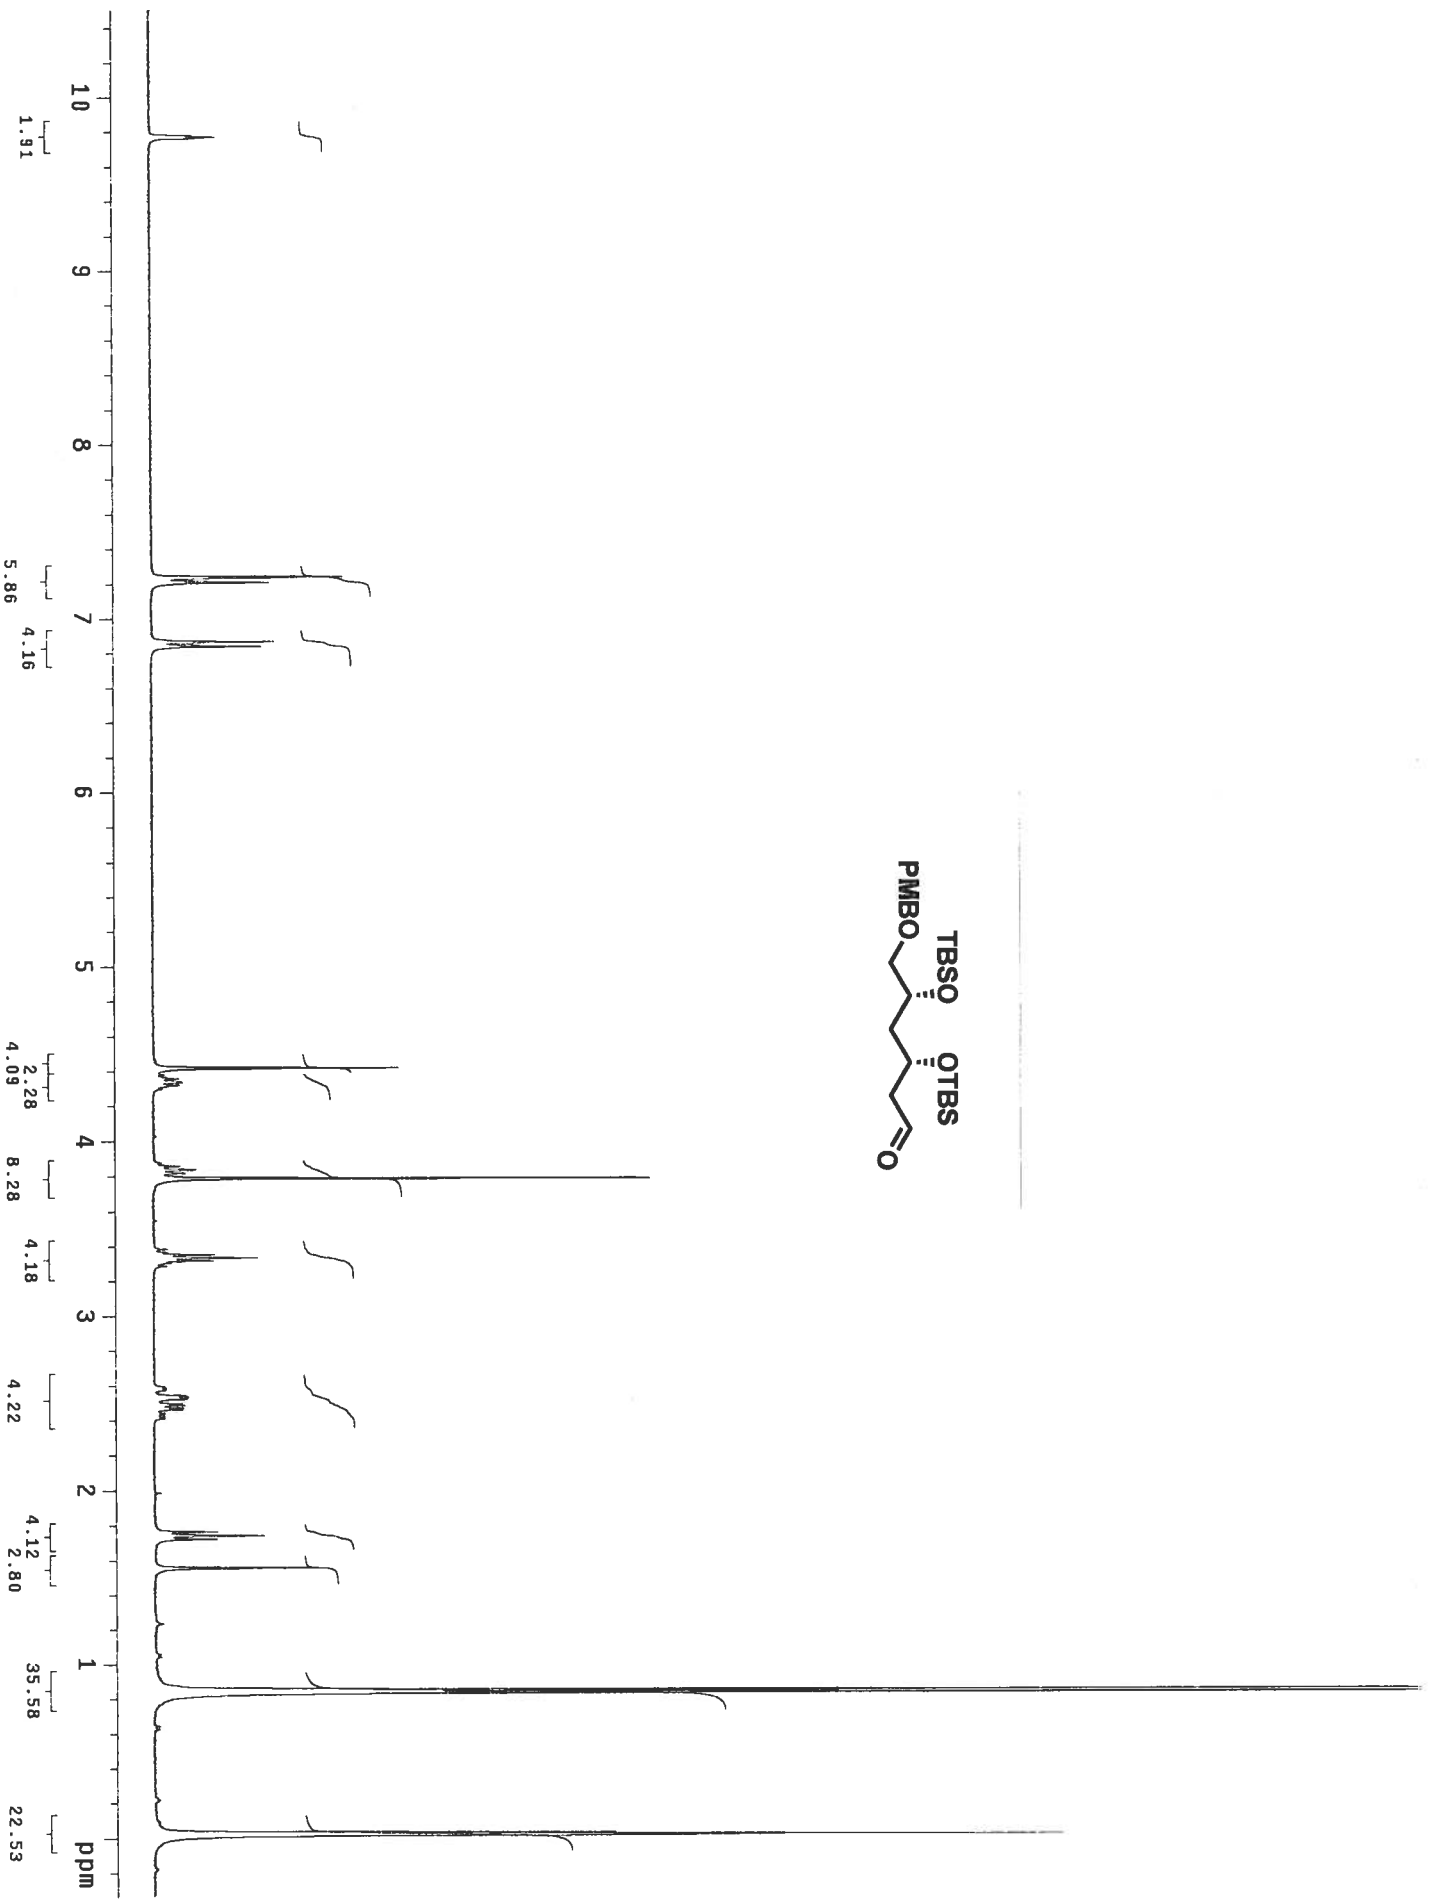



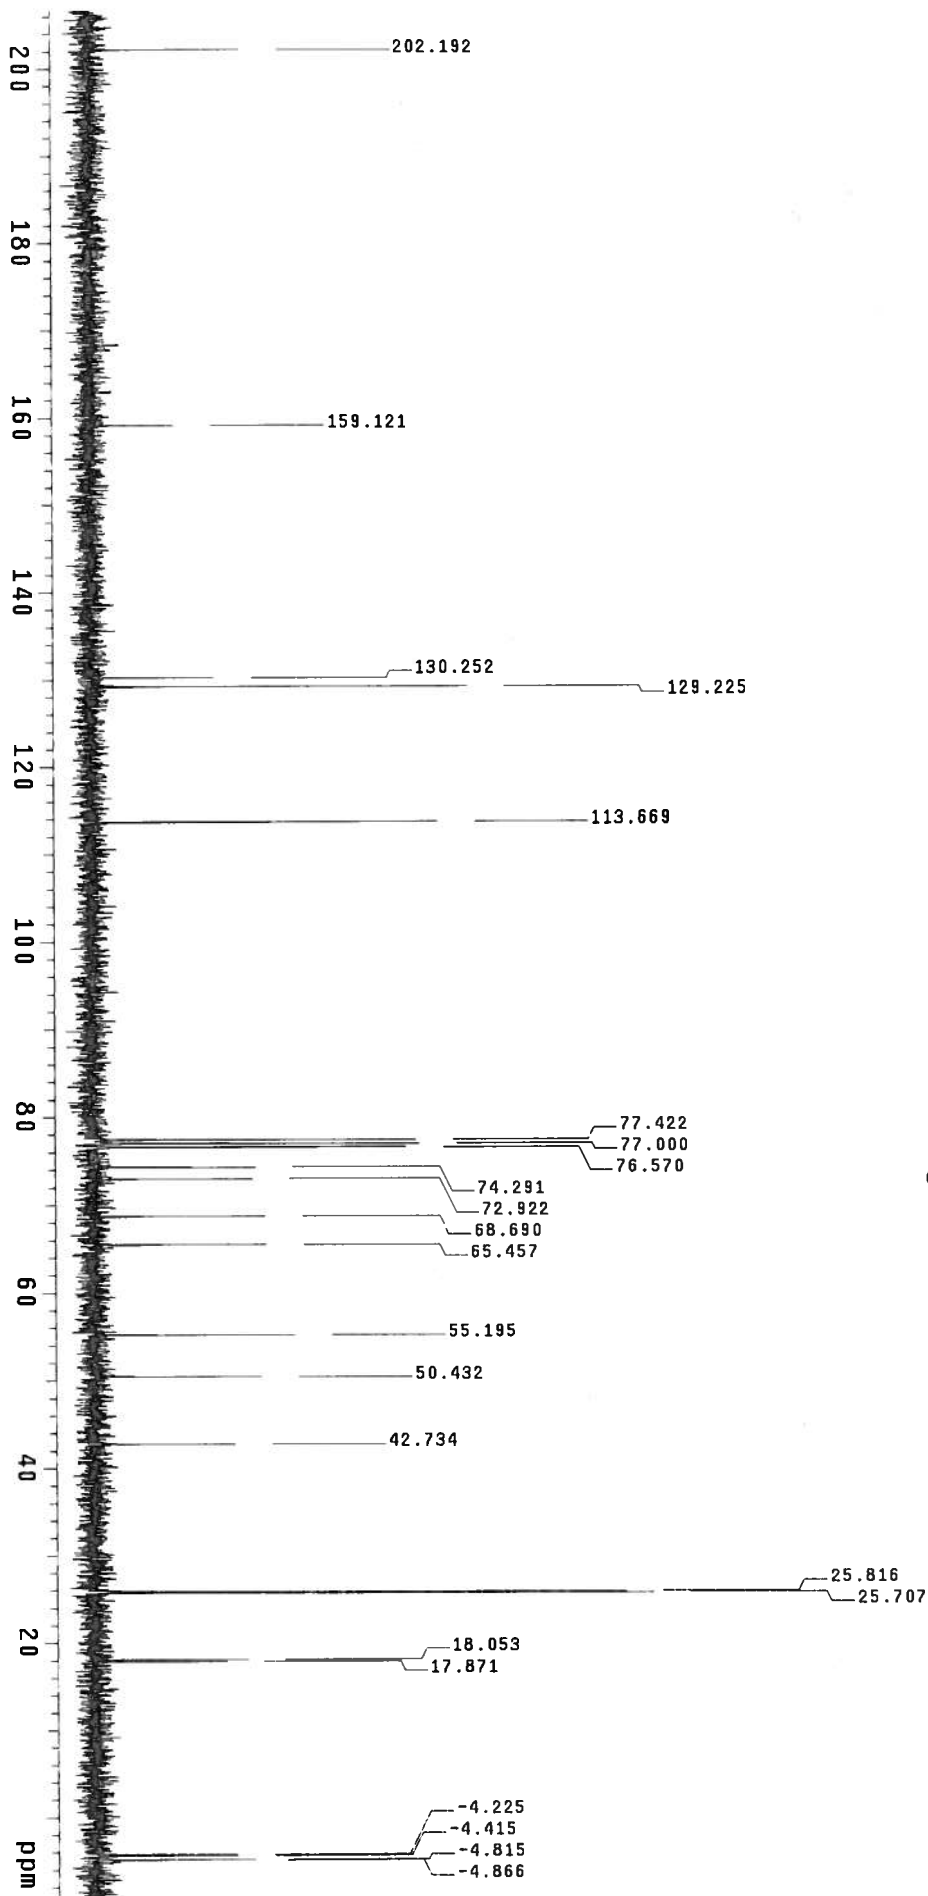

## Elemental Composition

Date : 12-OCT-2004

File:O12LU3700 Ident:3\_6 SMO(1,7) PKD(7,3,7,0.50%,80.0,80.00%,F,F)  
ZAB-E4F CI+ Voltage BpI:758560 TIC:29280920 Flags:NORM DEL ERR  
File Text:QINGQUAN WU / WQQ-03700  
Heteroatom Max: 20 Ion: Both Even and Odd  
Limits:

|             |            |            |                   |            |          |          |          |           |
|-------------|------------|------------|-------------------|------------|----------|----------|----------|-----------|
| 495.297001  | 5.0        |            |                   | -0.5       | 0        | 0        | 0        | 0         |
|             |            |            |                   | 10.0       | 200      | 400      | 5        | 2         |
| <b>Mass</b> | <b>mDa</b> | <b>PPM</b> | <b>Calc. Mass</b> | <b>DBE</b> | <b>C</b> | <b>H</b> | <b>O</b> | <b>Si</b> |
| 495.297001  | -0.8       | -1.6       | 495.296207        | 5.5        | 26       | 47       | 5        | 2         |

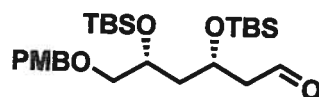

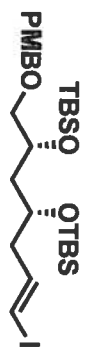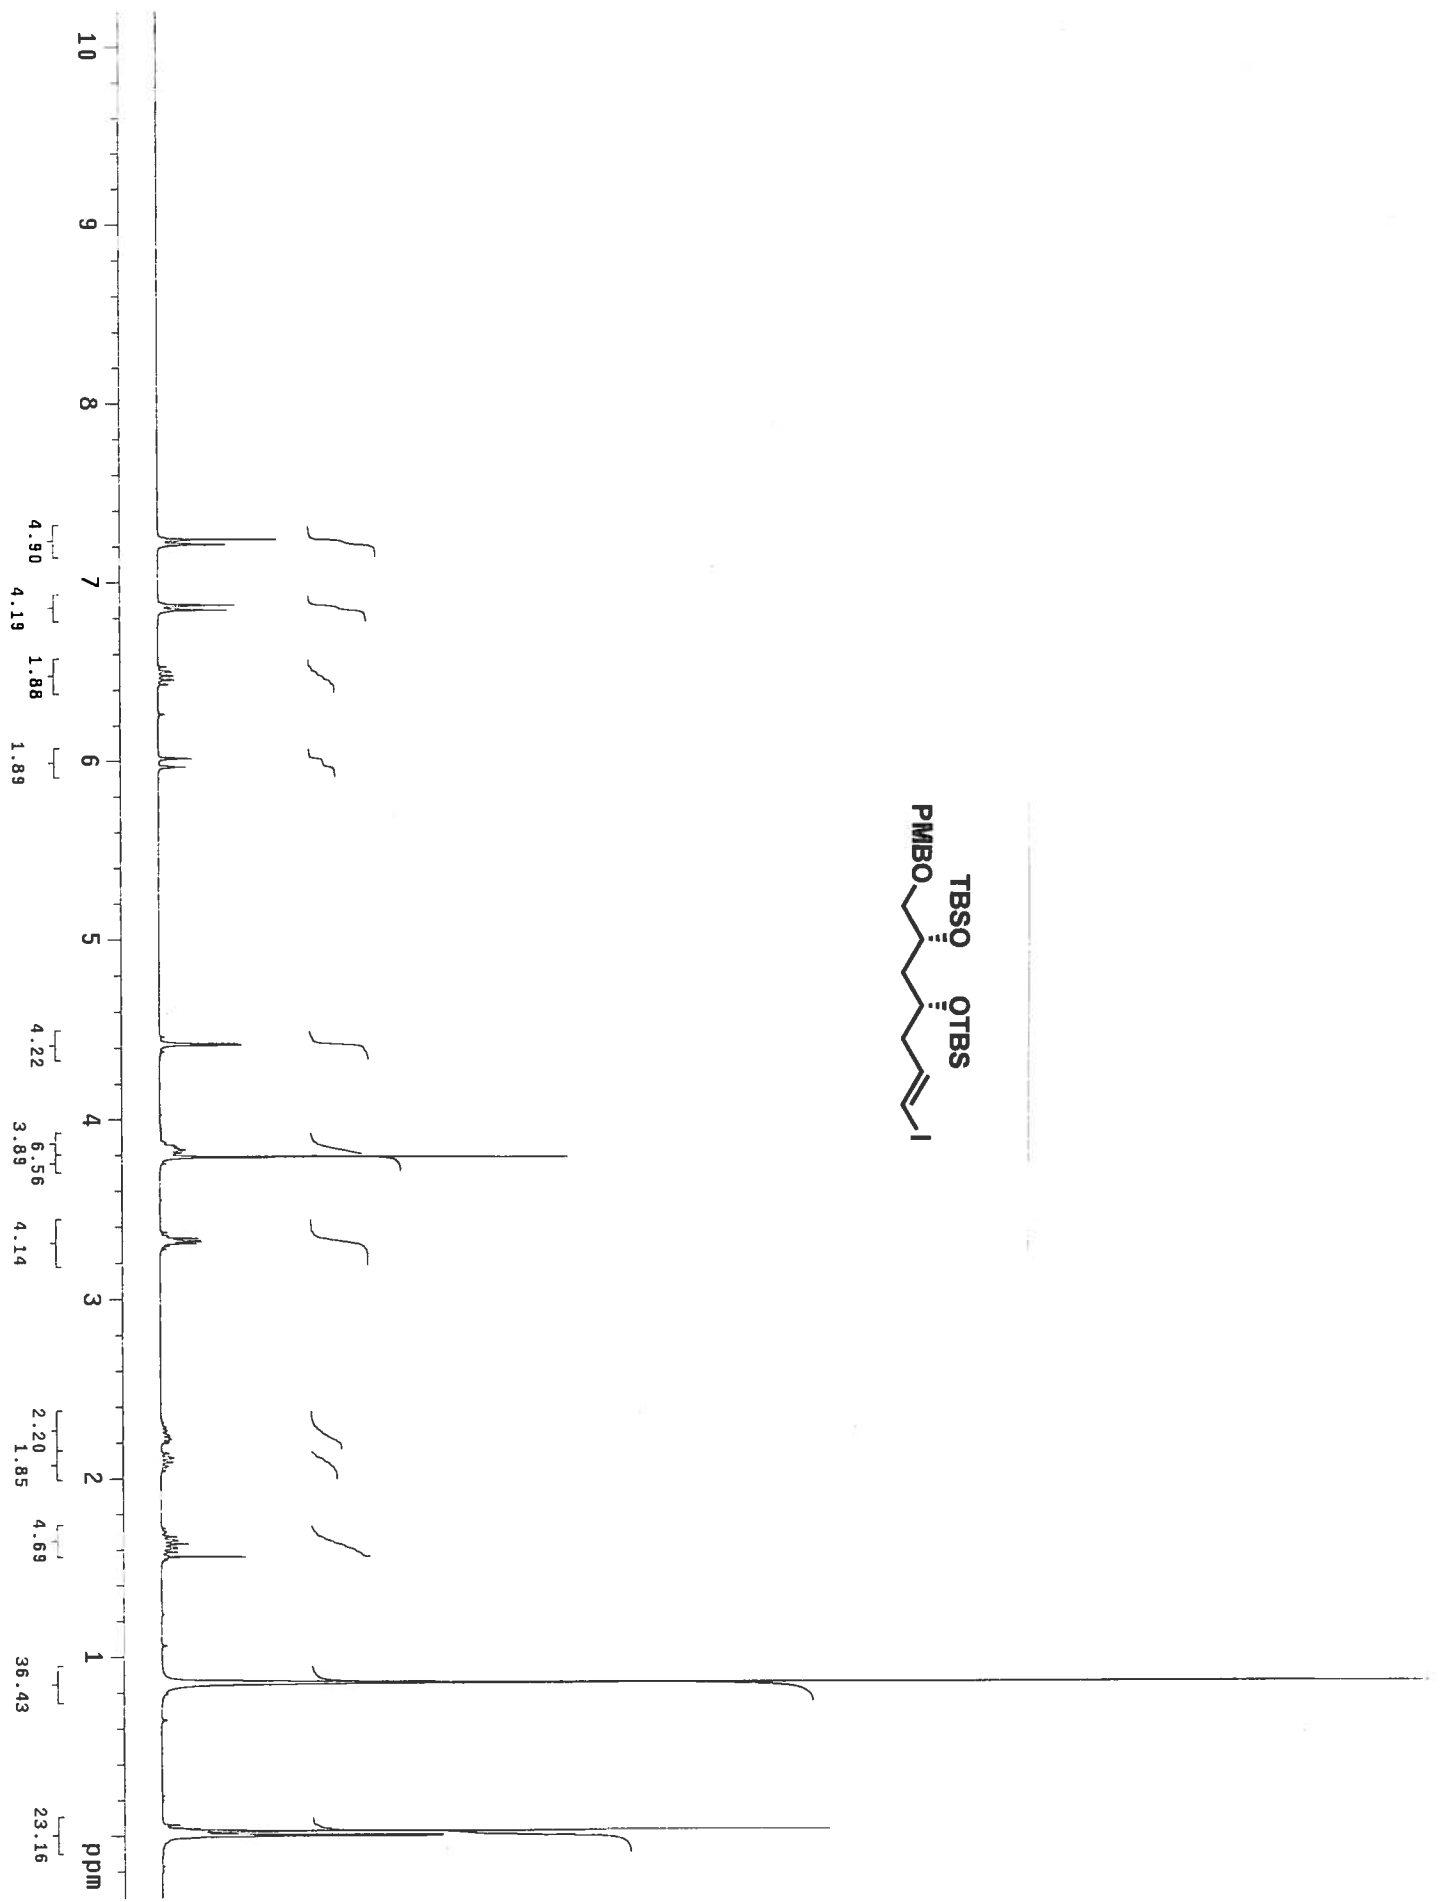

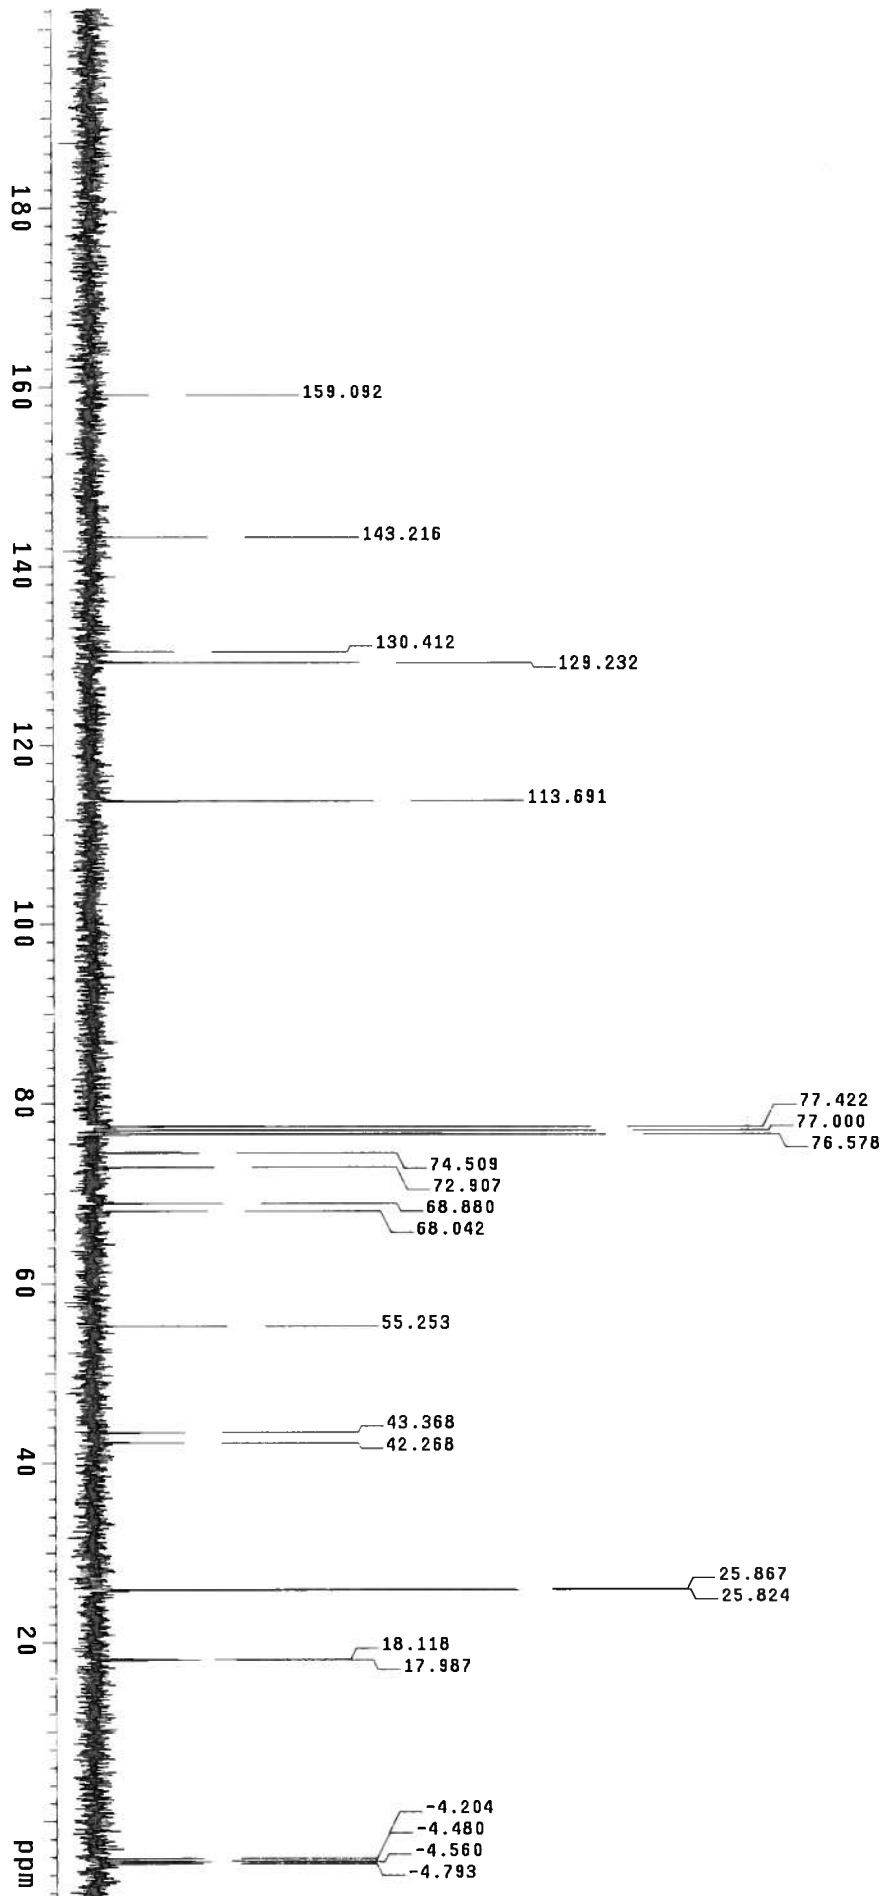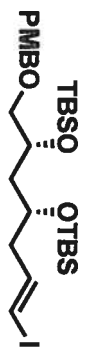

## Elemental Composition

Date : 14-OCT-2004

File:O14LU3761 Ident:5\_6 SMO(1,5) PKD(7,3,7,0.50%,80.0,80.00%,F,F)  
ZAB-E4F CI+ Voltage BpI:146832 TIC:8522244 Flags:NORM DEL ERR  
File Text:WQQ-03761 / QINGQUAN WU OPERATOR AND ANALYZER: ALBERT  
Heteroatom Max: 30 Ion: Both Even and Odd  
Limits:

|             |            |            |                   |            |          |          |          |           |          |
|-------------|------------|------------|-------------------|------------|----------|----------|----------|-----------|----------|
| 619.213630  | 5.0        |            |                   | -0.5       | 0        | 0        | 0        | 0         | 0        |
|             |            |            |                   | 20.0       | 200      | 400      | 4        | 2         | 1        |
| <b>Mass</b> | <b>mDa</b> | <b>PPM</b> | <b>Calc. Mass</b> | <b>DBE</b> | <b>C</b> | <b>H</b> | <b>O</b> | <b>Si</b> | <b>I</b> |
| 619.213630  | 0.0        | -0.1       | 619.213594        | 5.5        | 27       | 48       | 4        | 2         | 1        |

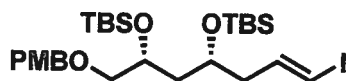

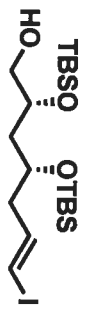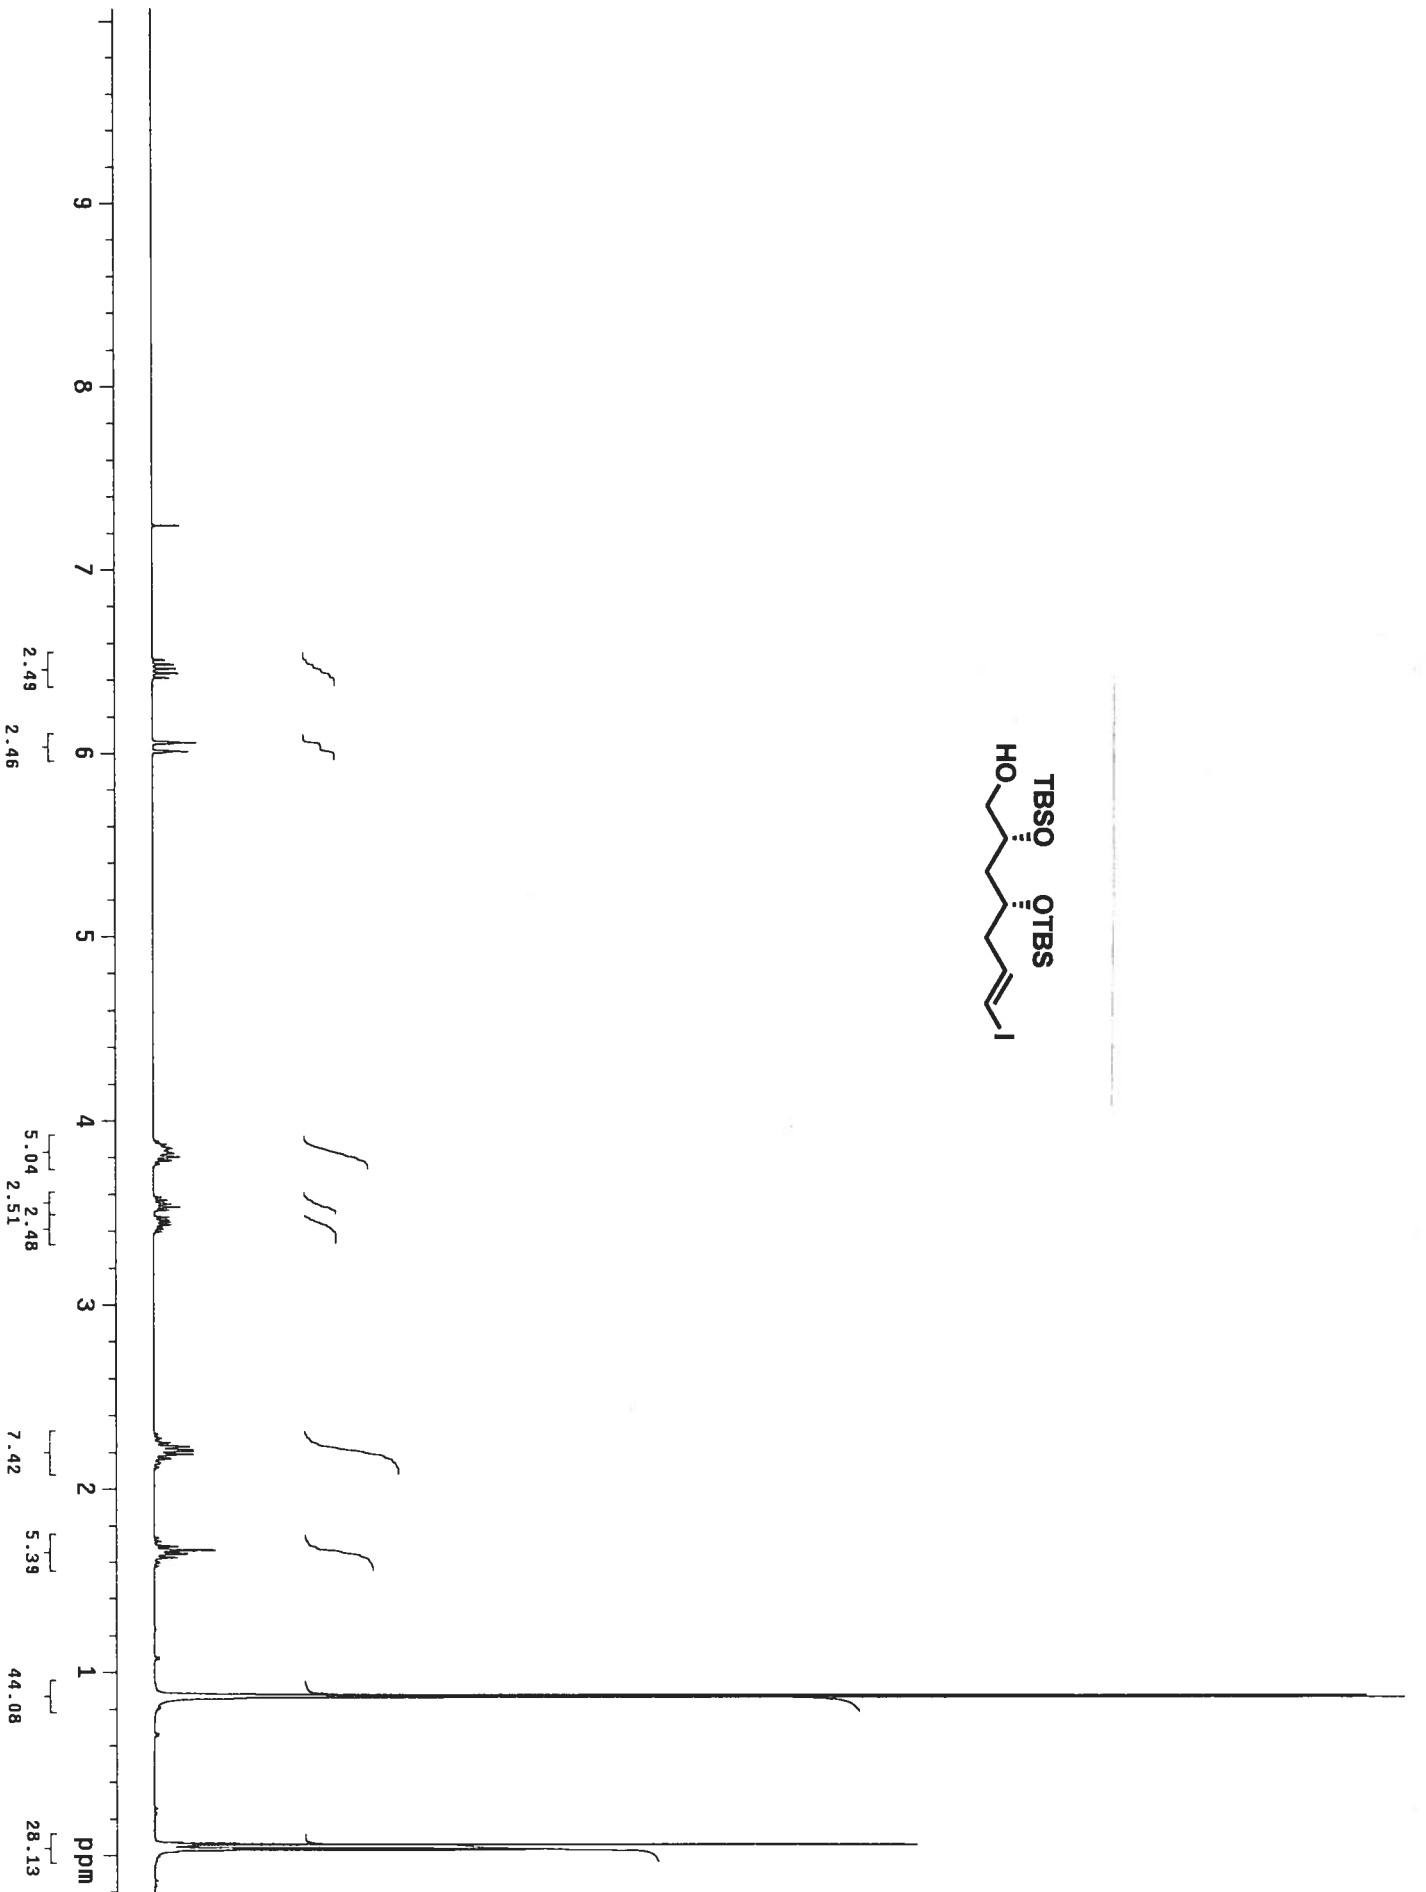



## Elemental Composition

Date : 14-OCT-2004

File:O14LU3762 Ident:14 SMO(1,5) PKD(7,3,7,0.50%,80.0,80.00%,F,F)  
ZAB-E4F CI+ Voltage BpI:400640 TIC:10381599 Flags:NORM DEL ERR  
File Text:WQQ-03762 / QINGQUAN WU  
Heteroatom Max: 30 Ion: Both Even and Odd  
Limits:

|             |            |            |                   |              |          |          |          |           |          |
|-------------|------------|------------|-------------------|--------------|----------|----------|----------|-----------|----------|
| 501.171312  | 5.0        |            |                   | -0.5<br>10.0 | 0<br>200 | 0<br>400 | 0<br>3   | 0<br>2    | 0<br>1   |
| <b>Mass</b> | <b>mDa</b> | <b>PPM</b> | <b>Calc. Mass</b> | <b>DBE</b>   | <b>C</b> | <b>H</b> | <b>O</b> | <b>Si</b> | <b>I</b> |
| 501.171312  | 0.4        | 0.8        | 501.171729        | 0.5          | 19       | 42       | 3        | 2         | 1        |

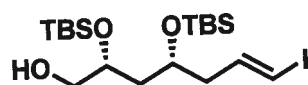



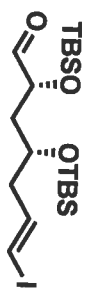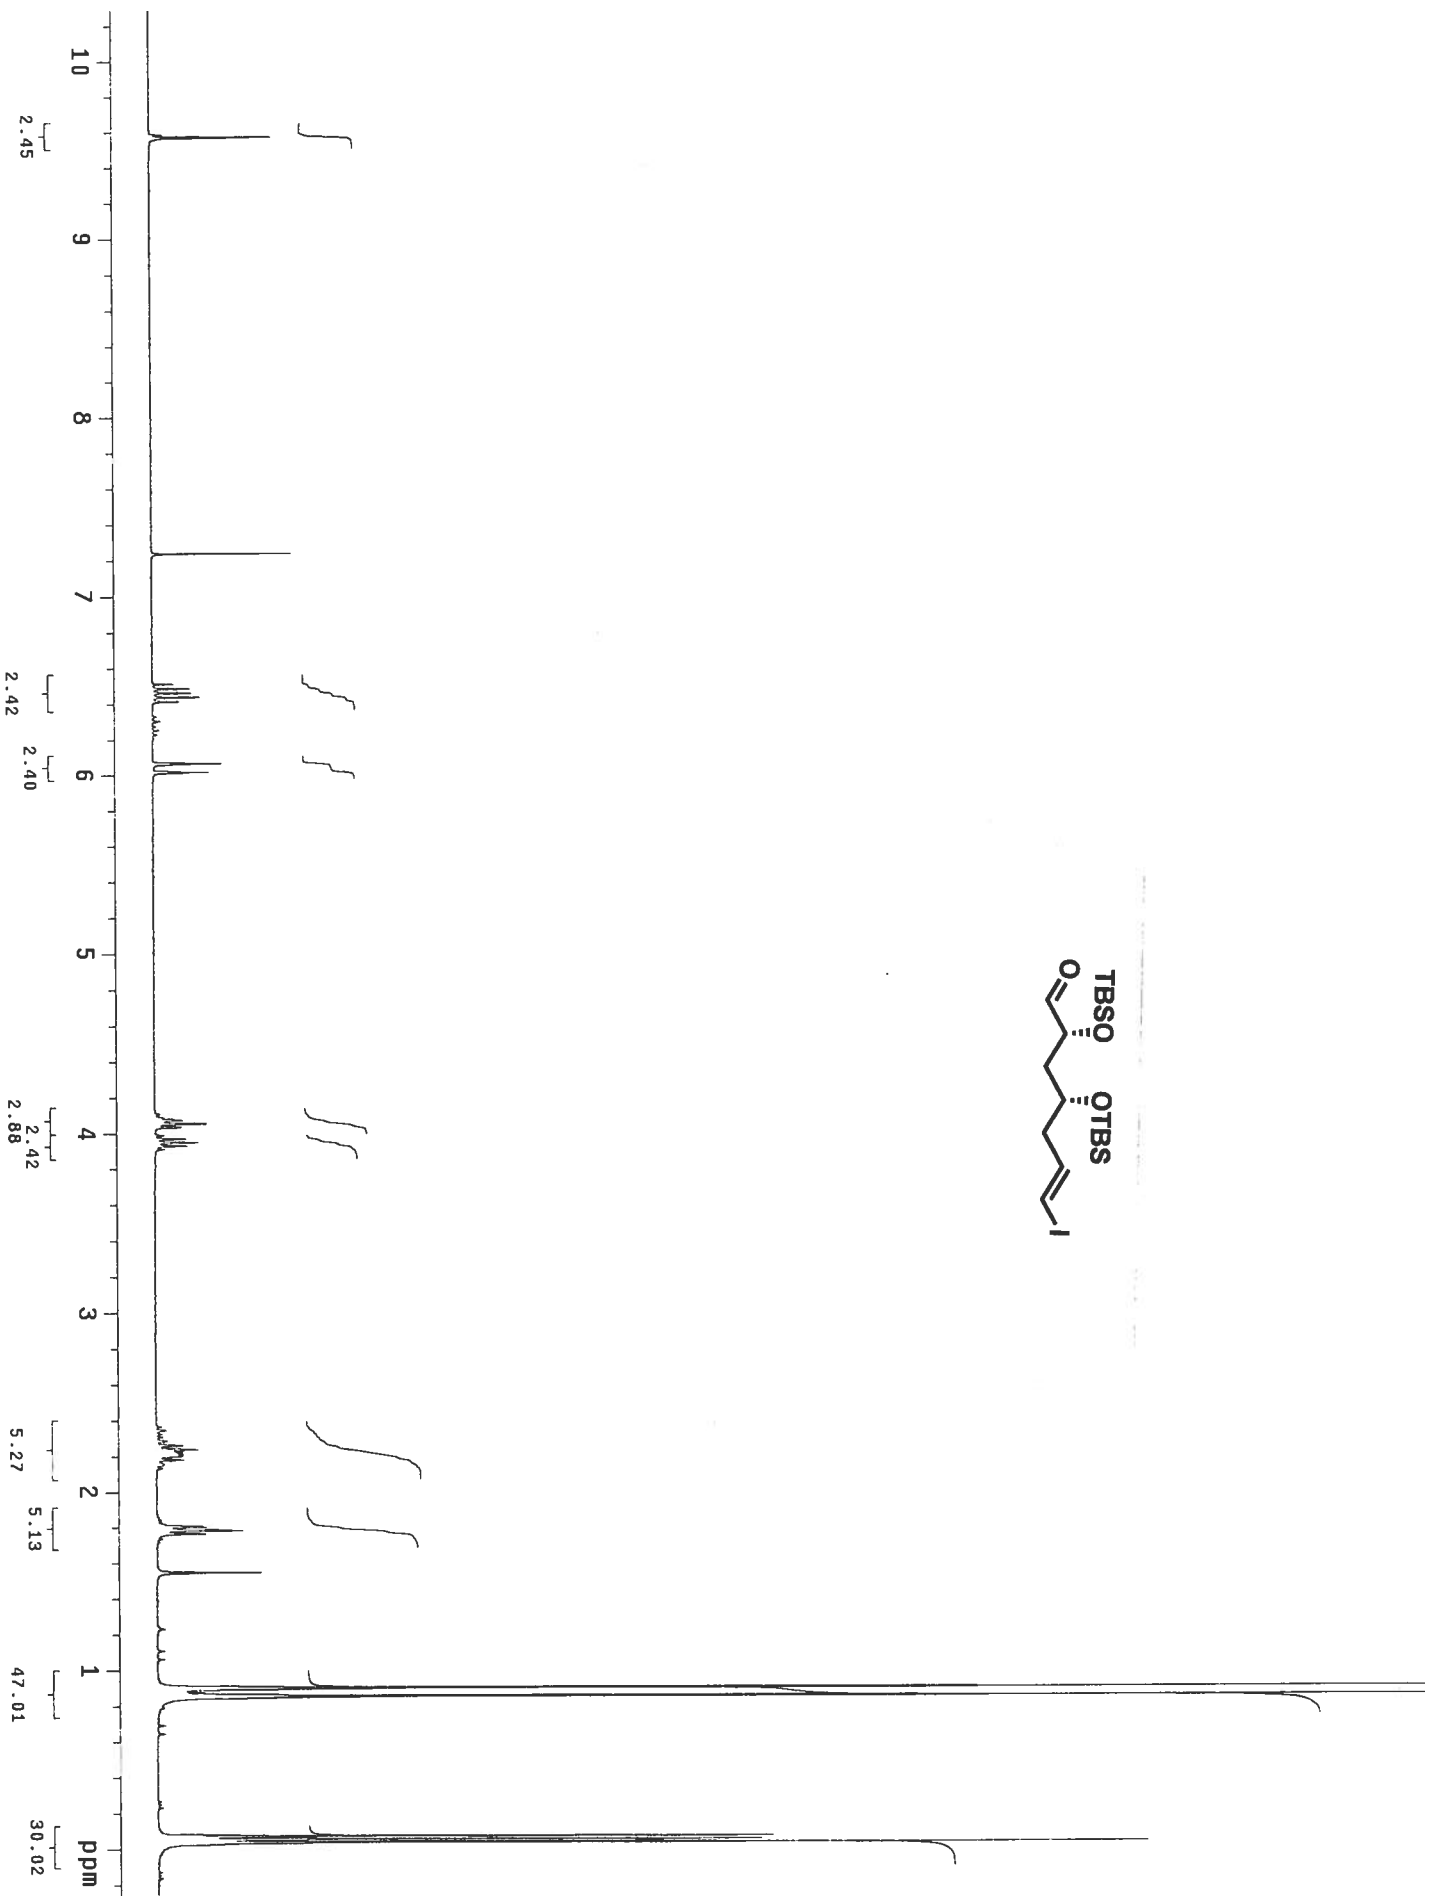

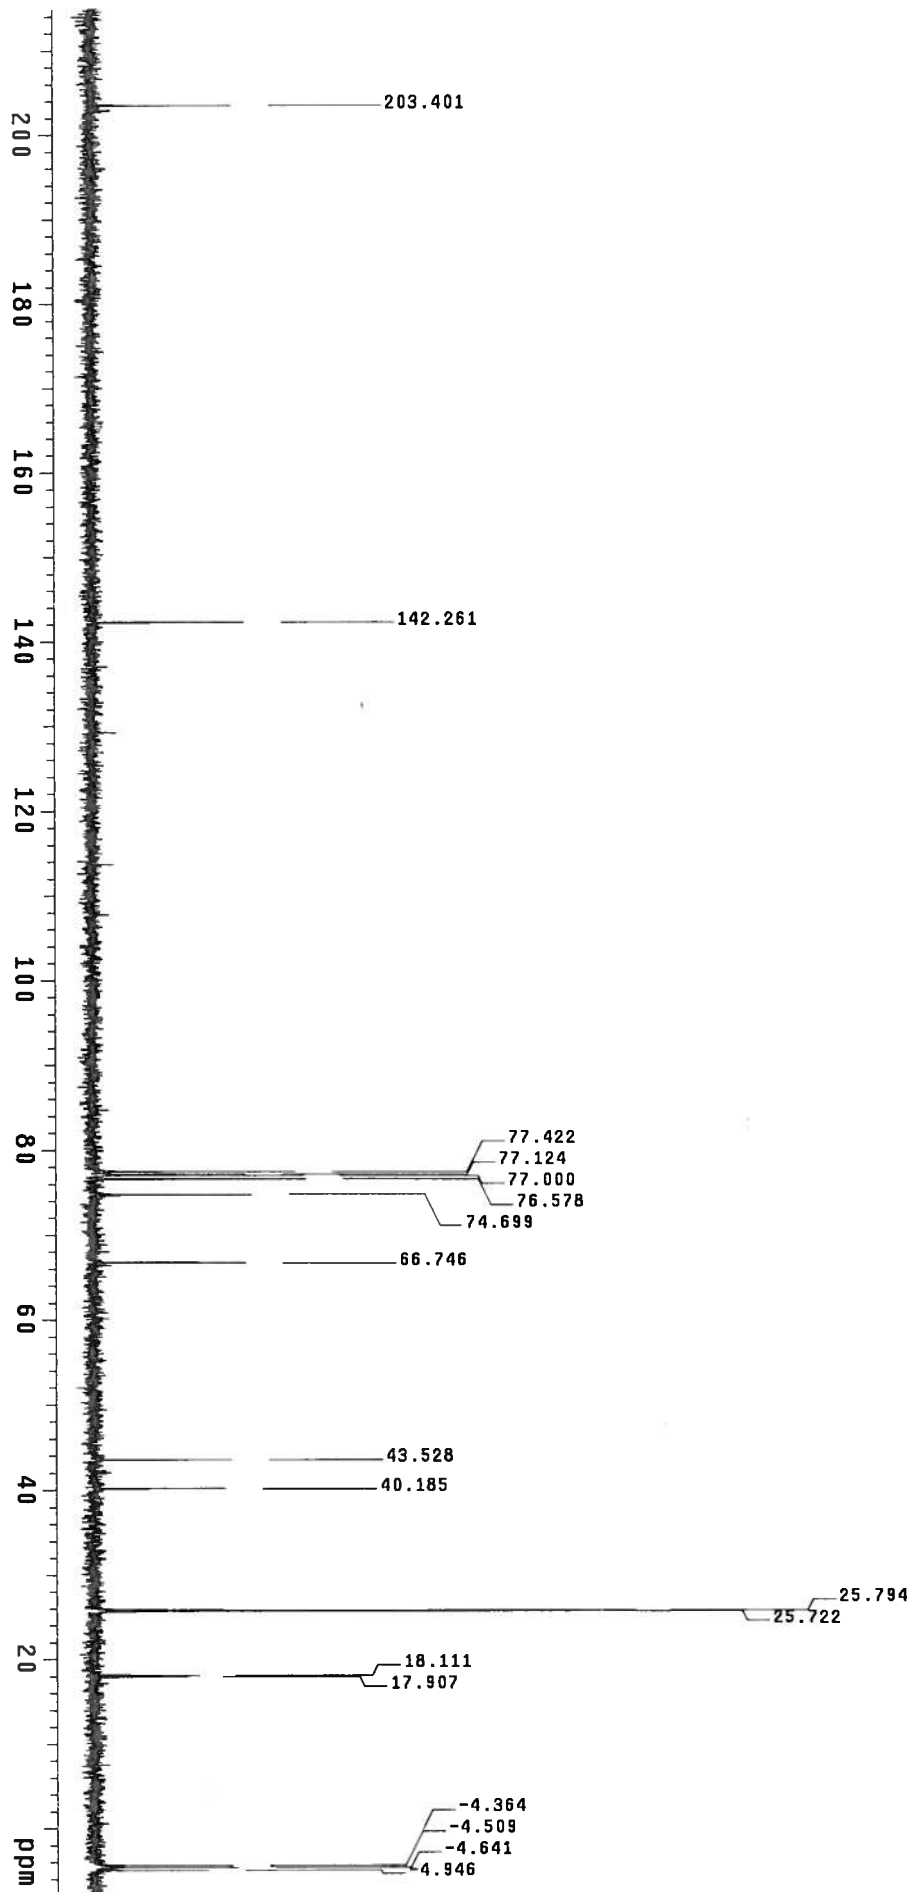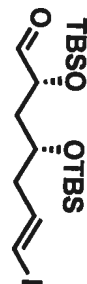

## Elemental Composition

Date : 13-OCT-2004

File:O13LU3760 Ident:1 SMO(1,5) PKD(7,3,7,0.50%,80.0,80.00%,F,F)  
ZAB-E4F CI+ Voltage BpI:34432 TIC:2420439 Flags:NORM DEL ERR  
File Text:WQQ-03760 / QINGQUAN WU  
Heteroatom Max: 20 Ion: Both Even and Odd  
Limits:

|             |            |            |                   |            |          |          |          |           |          |
|-------------|------------|------------|-------------------|------------|----------|----------|----------|-----------|----------|
| 499.157233  | 5.0        |            |                   | -0.5       | 0        | 0        | 0        | 0         | 0        |
|             |            |            |                   | 10.0       | 200      | 400      | 3        | 2         | 1        |
| <b>Mass</b> | <b>mDa</b> | <b>PPM</b> | <b>Calc. Mass</b> | <b>DBE</b> | <b>C</b> | <b>H</b> | <b>O</b> | <b>Si</b> | <b>I</b> |
| 499.157233  | -1.2       | -2.3       | 499.156079        | 1.5        | 19       | 40       | 3        | 2         | 1        |

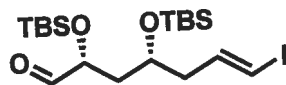

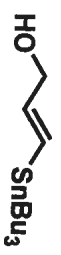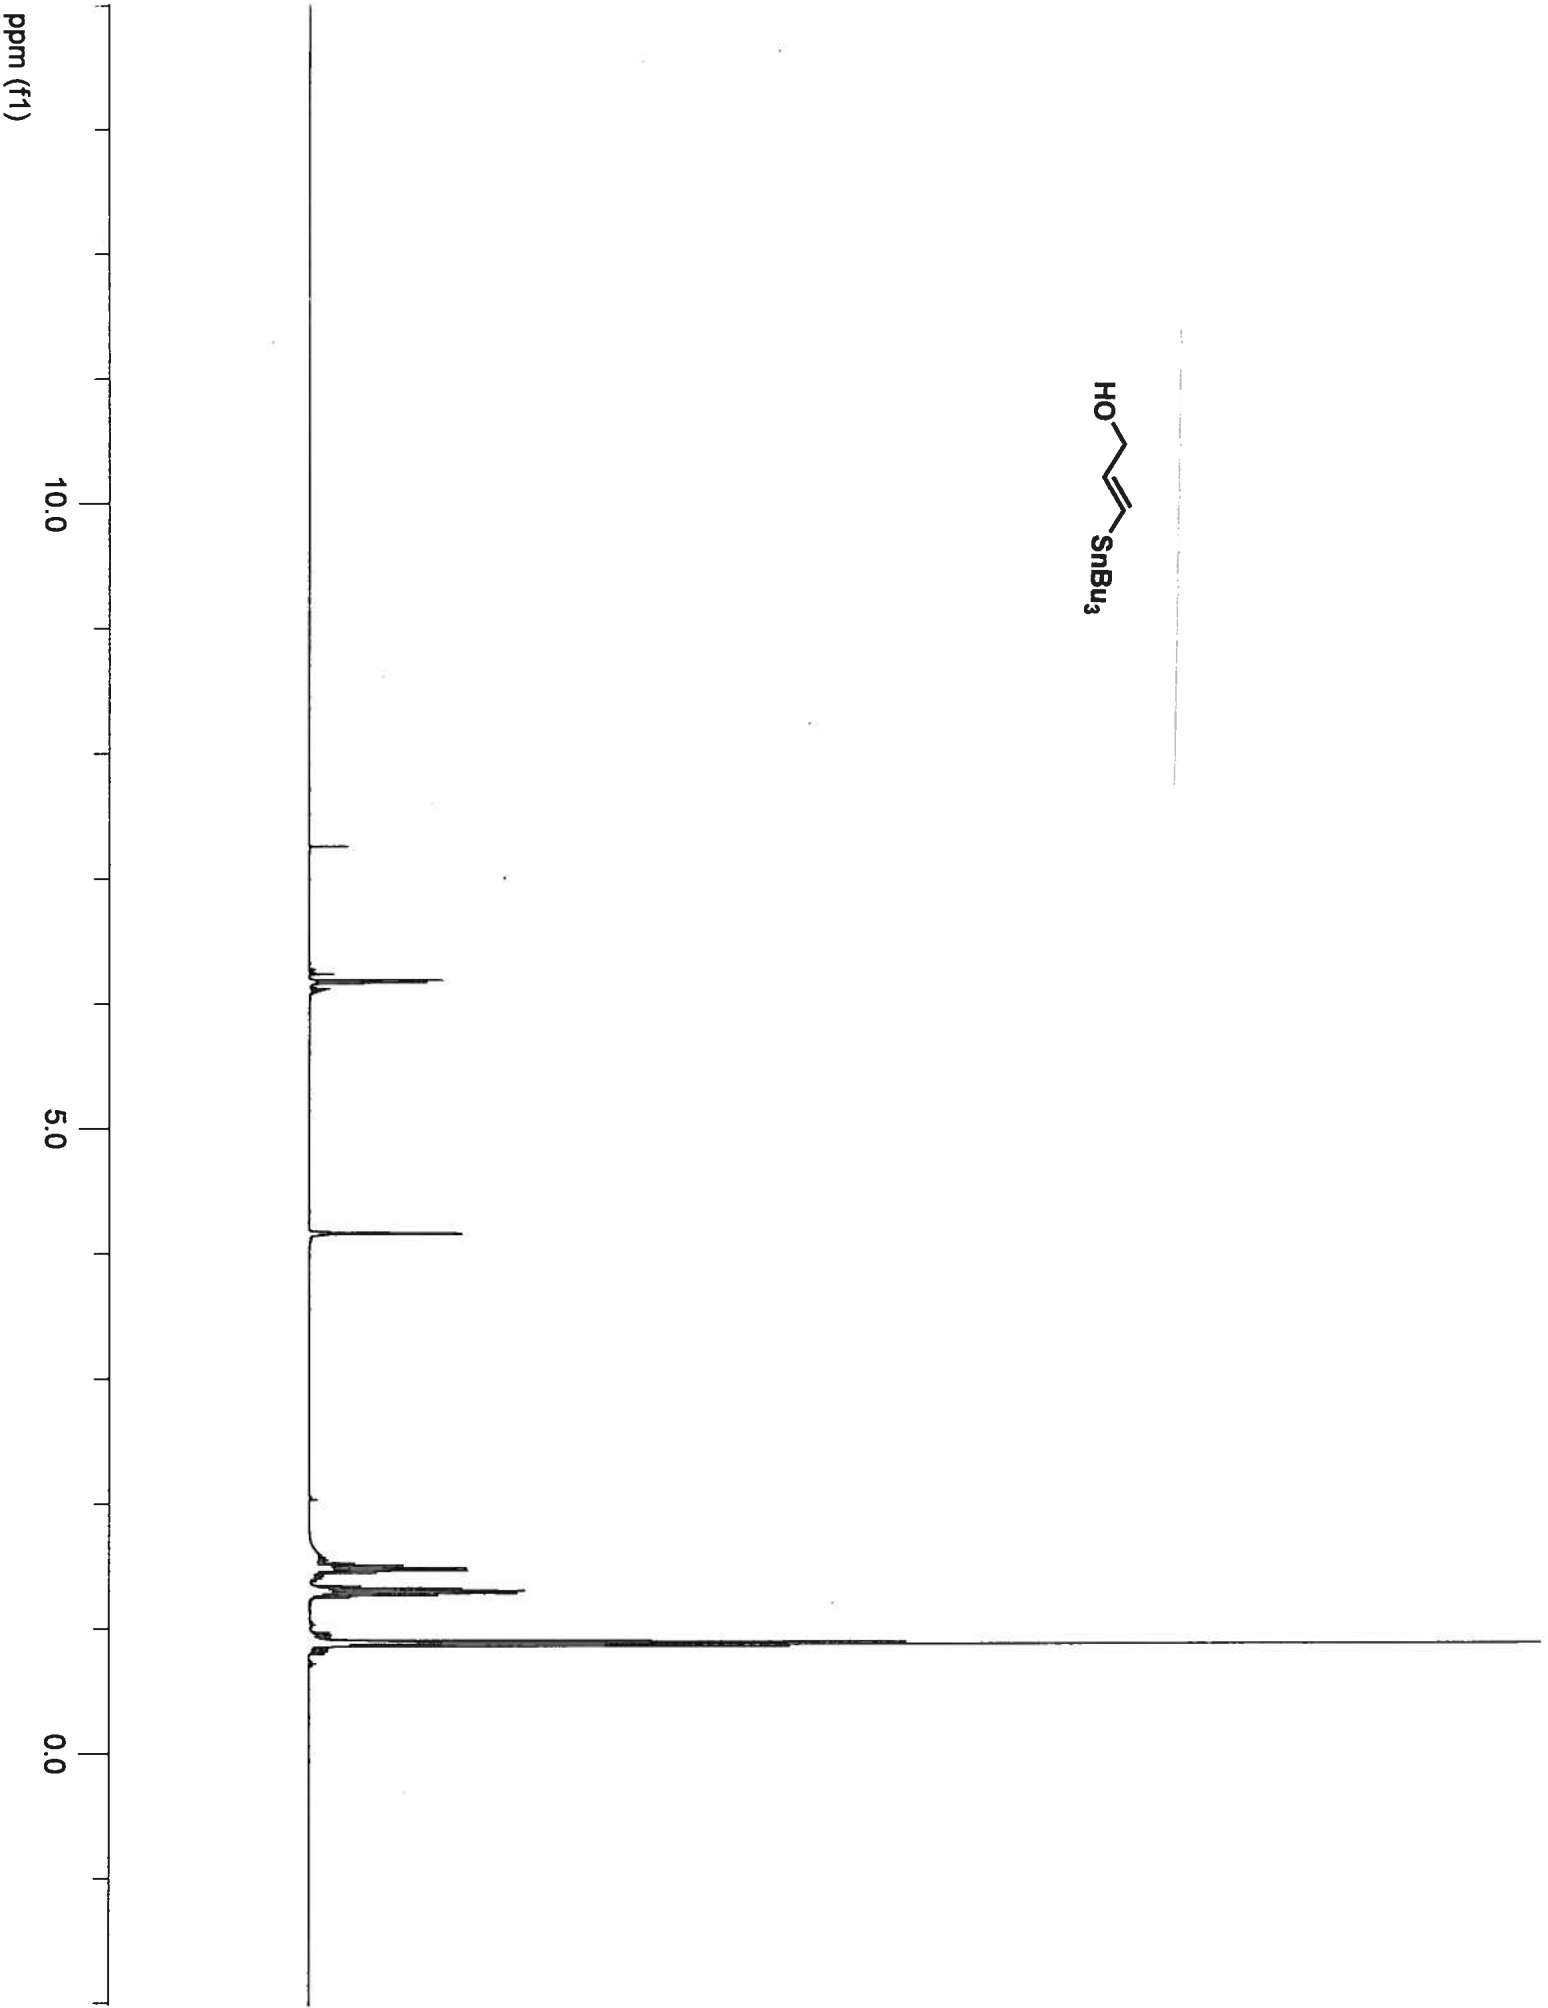

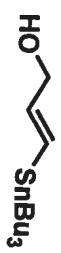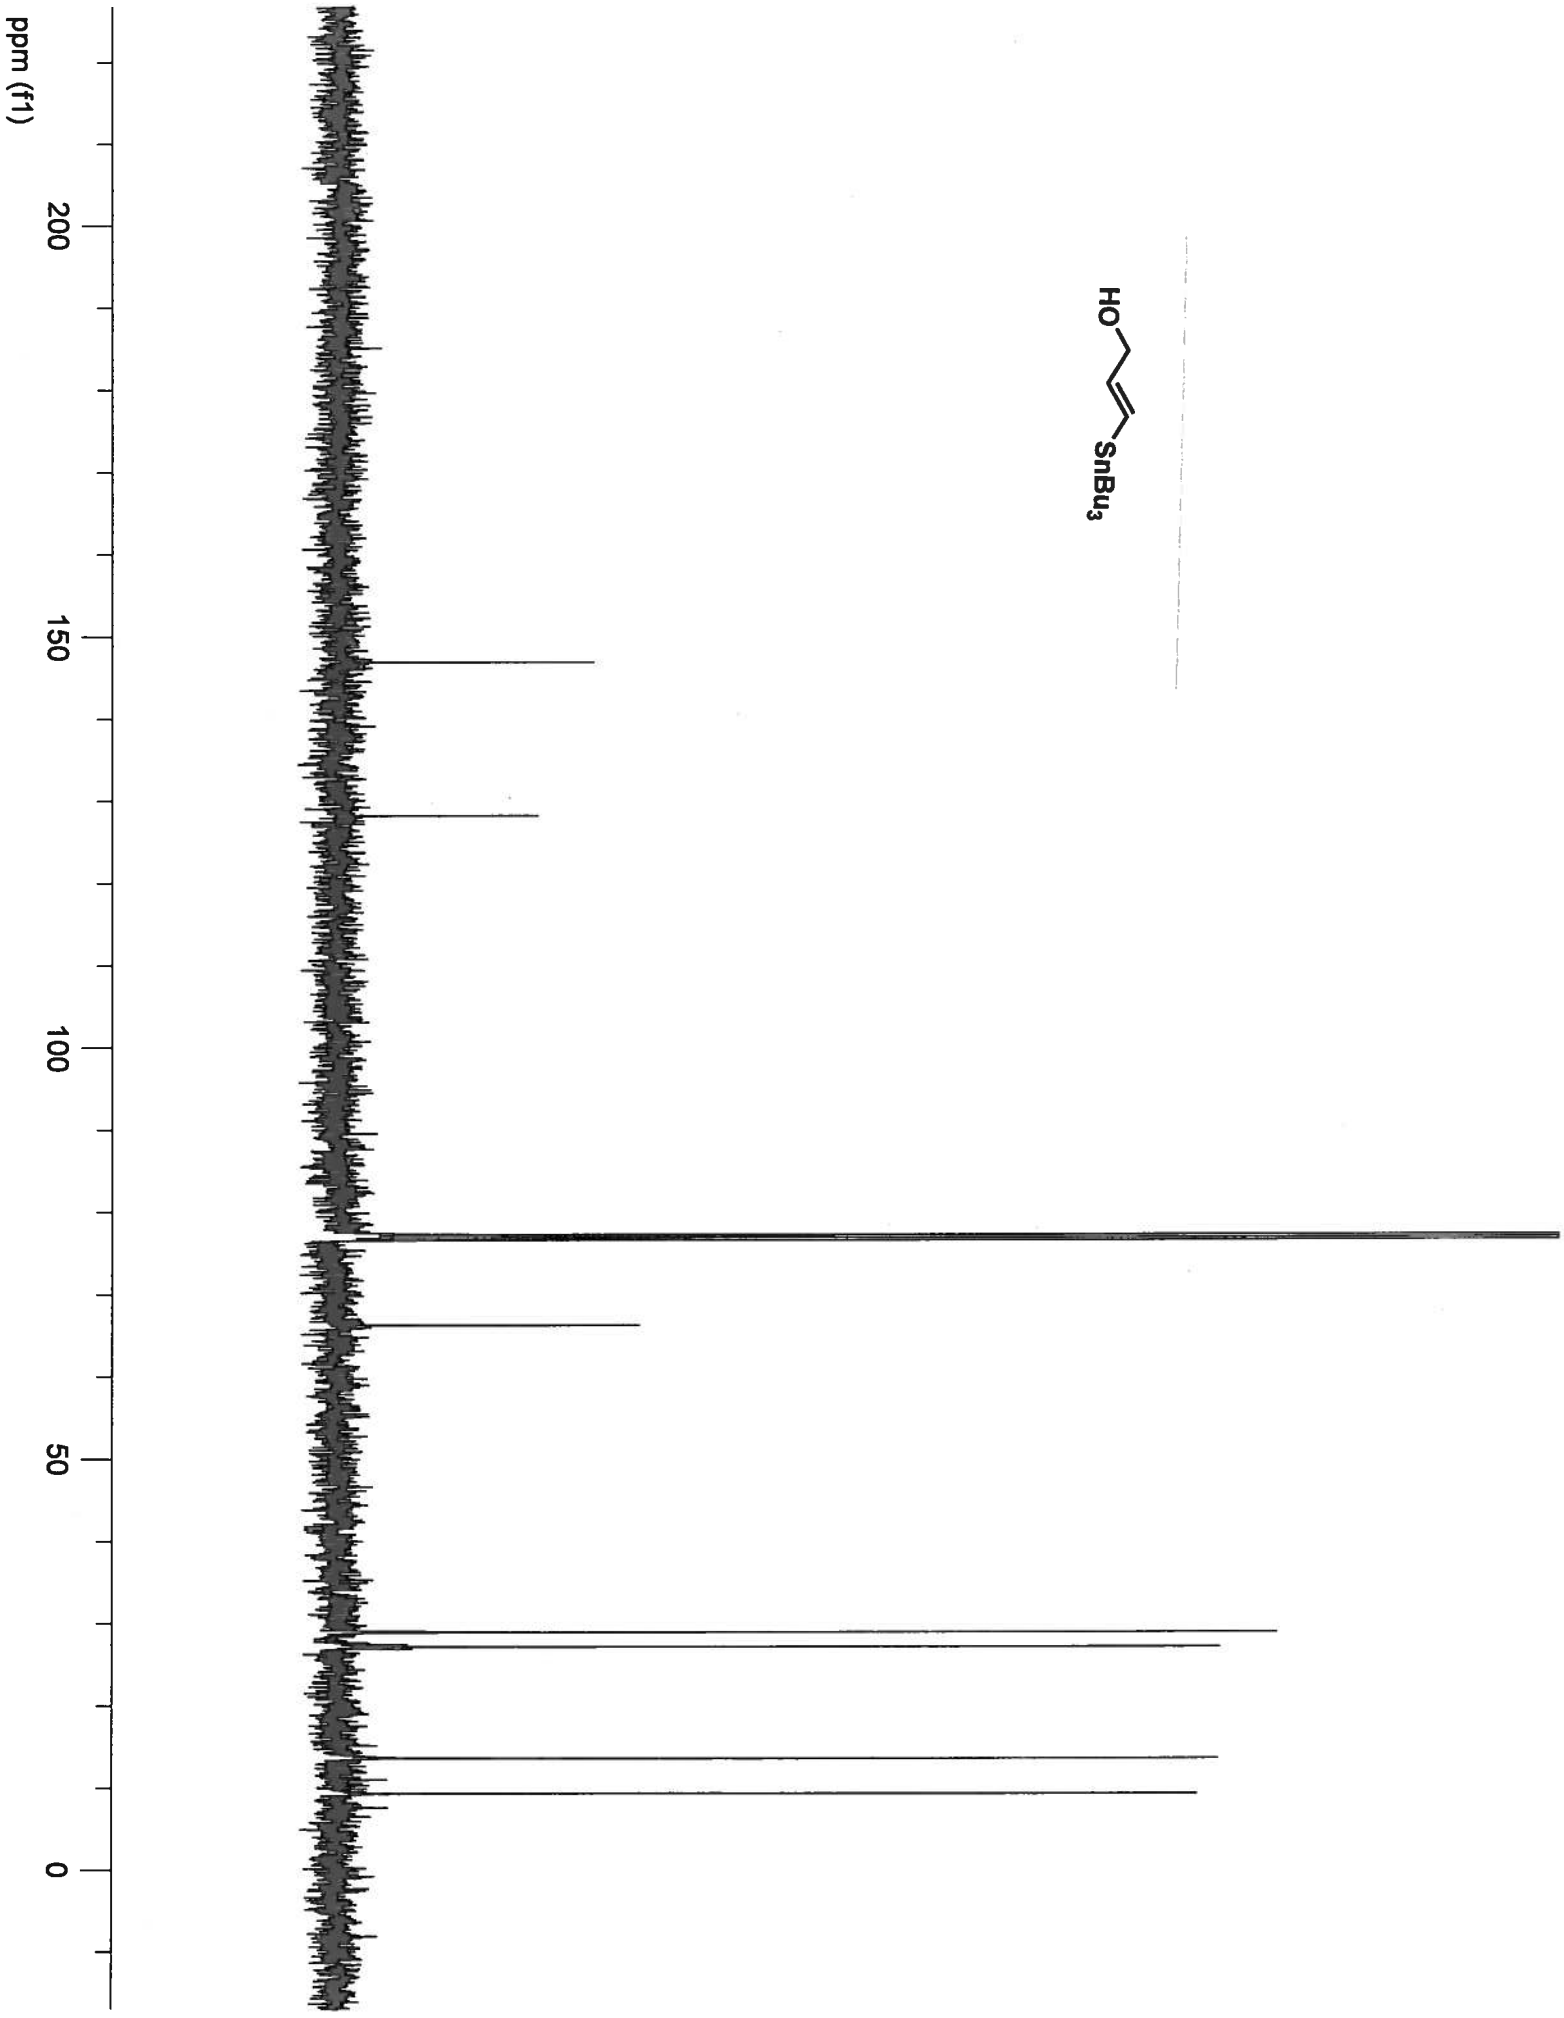



ppm (f1)

200

150

100

50

0

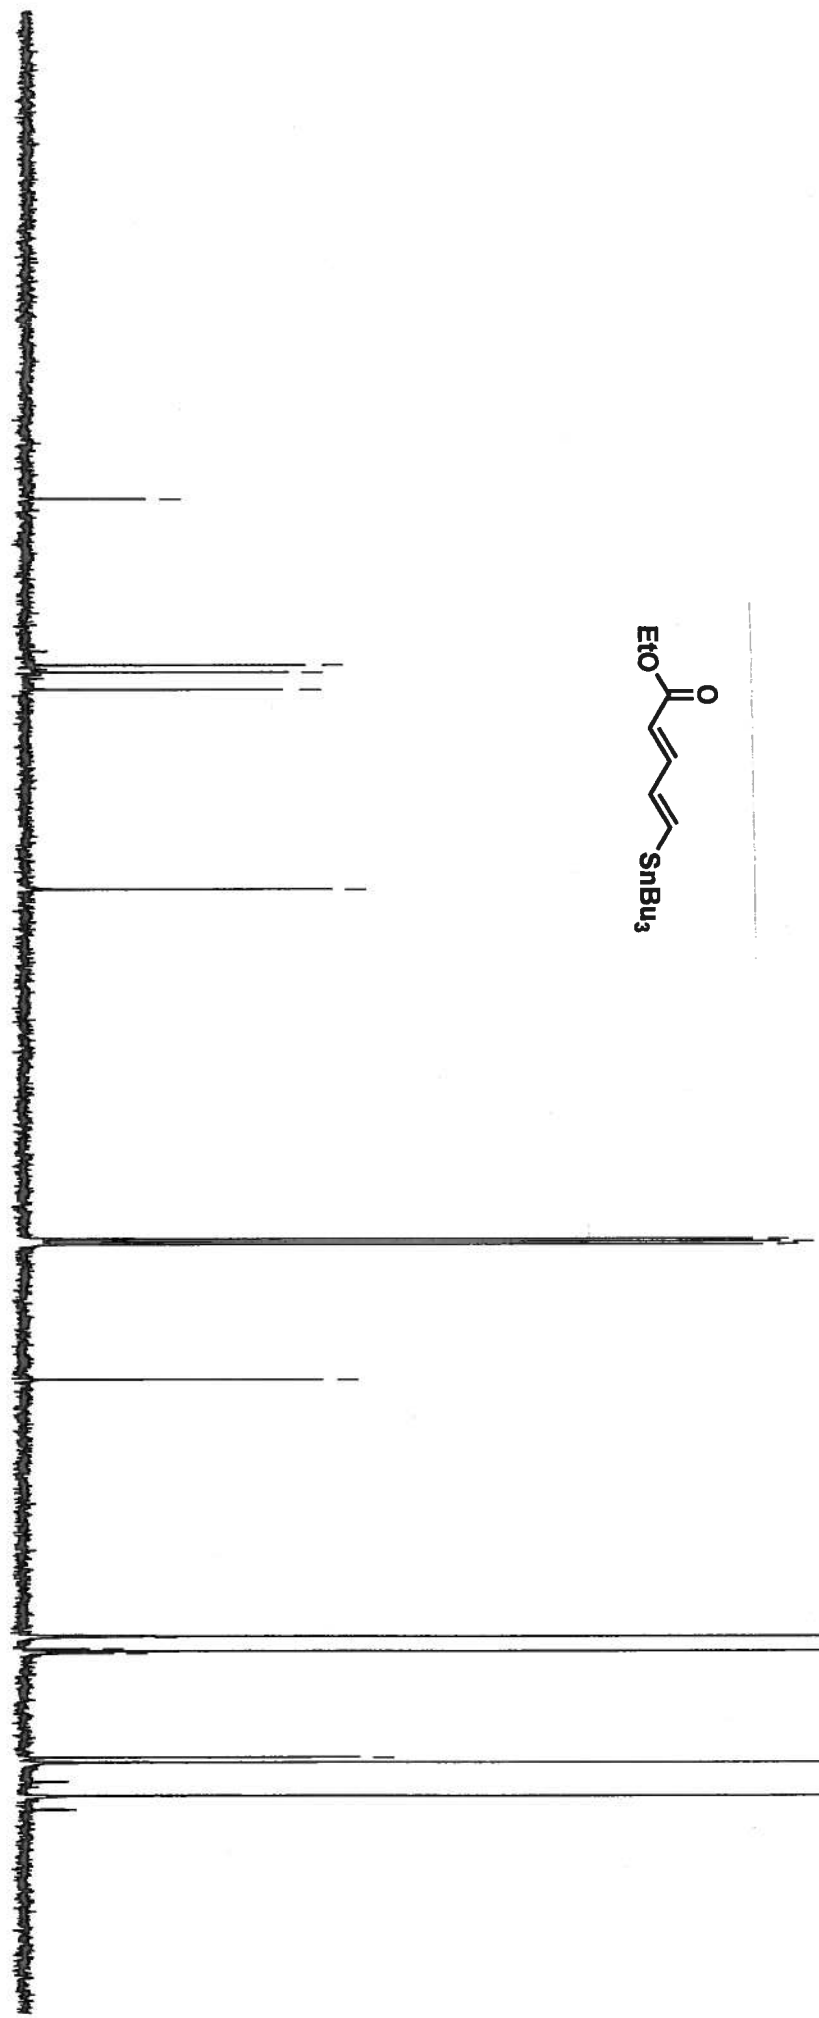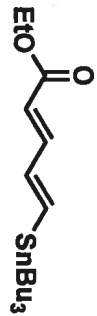

167.38

147.17

146.30

144.19

119.87

77.32

77.00

76.68

60.24

29.13

29.02

28.92

27.49

27.21

26.94

14.28

13.66

9.59

Single Mass Analysis

Tolerance = 5.0 PPM / DBE: min = -1000.0, max = 1000.0

Selected filters: None

Monoisotopic Mass, Odd and Even Electron Ions

136 formula(e) evaluated with 1 results within limits (all results (up to 1000) for each mass)

Elements Used:

C: 2-250 H: 1-100 O: 0-8 Sn: 1-2

HJ09-062

LIU6952 20 (0.368) Cn (Cen,5, 80.00, Ht); Cm (20:37)

08-Dec-2008

Voltage Cl+

1.25e3

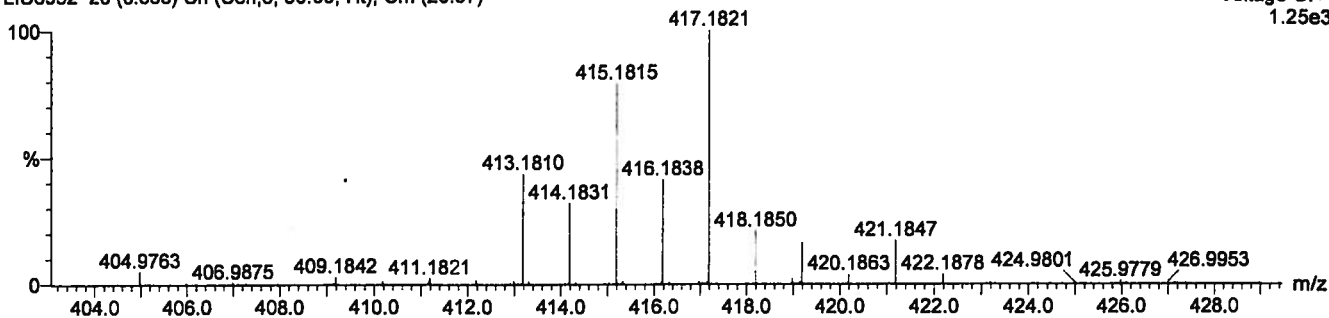

Minimum: -1000.0  
Maximum: 20.0 5.0 1000.0

| Mass     | Calc. Mass | mDa | PPM | DBE | i-FIT | Formula       |
|----------|------------|-----|-----|-----|-------|---------------|
| 417.1821 | 417.1816   | 0.5 | 1.2 | 2.5 | 0.1   | C19 H37 O2 Sn |

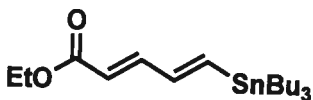



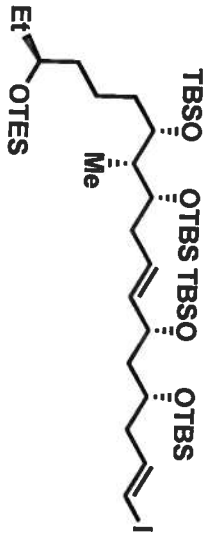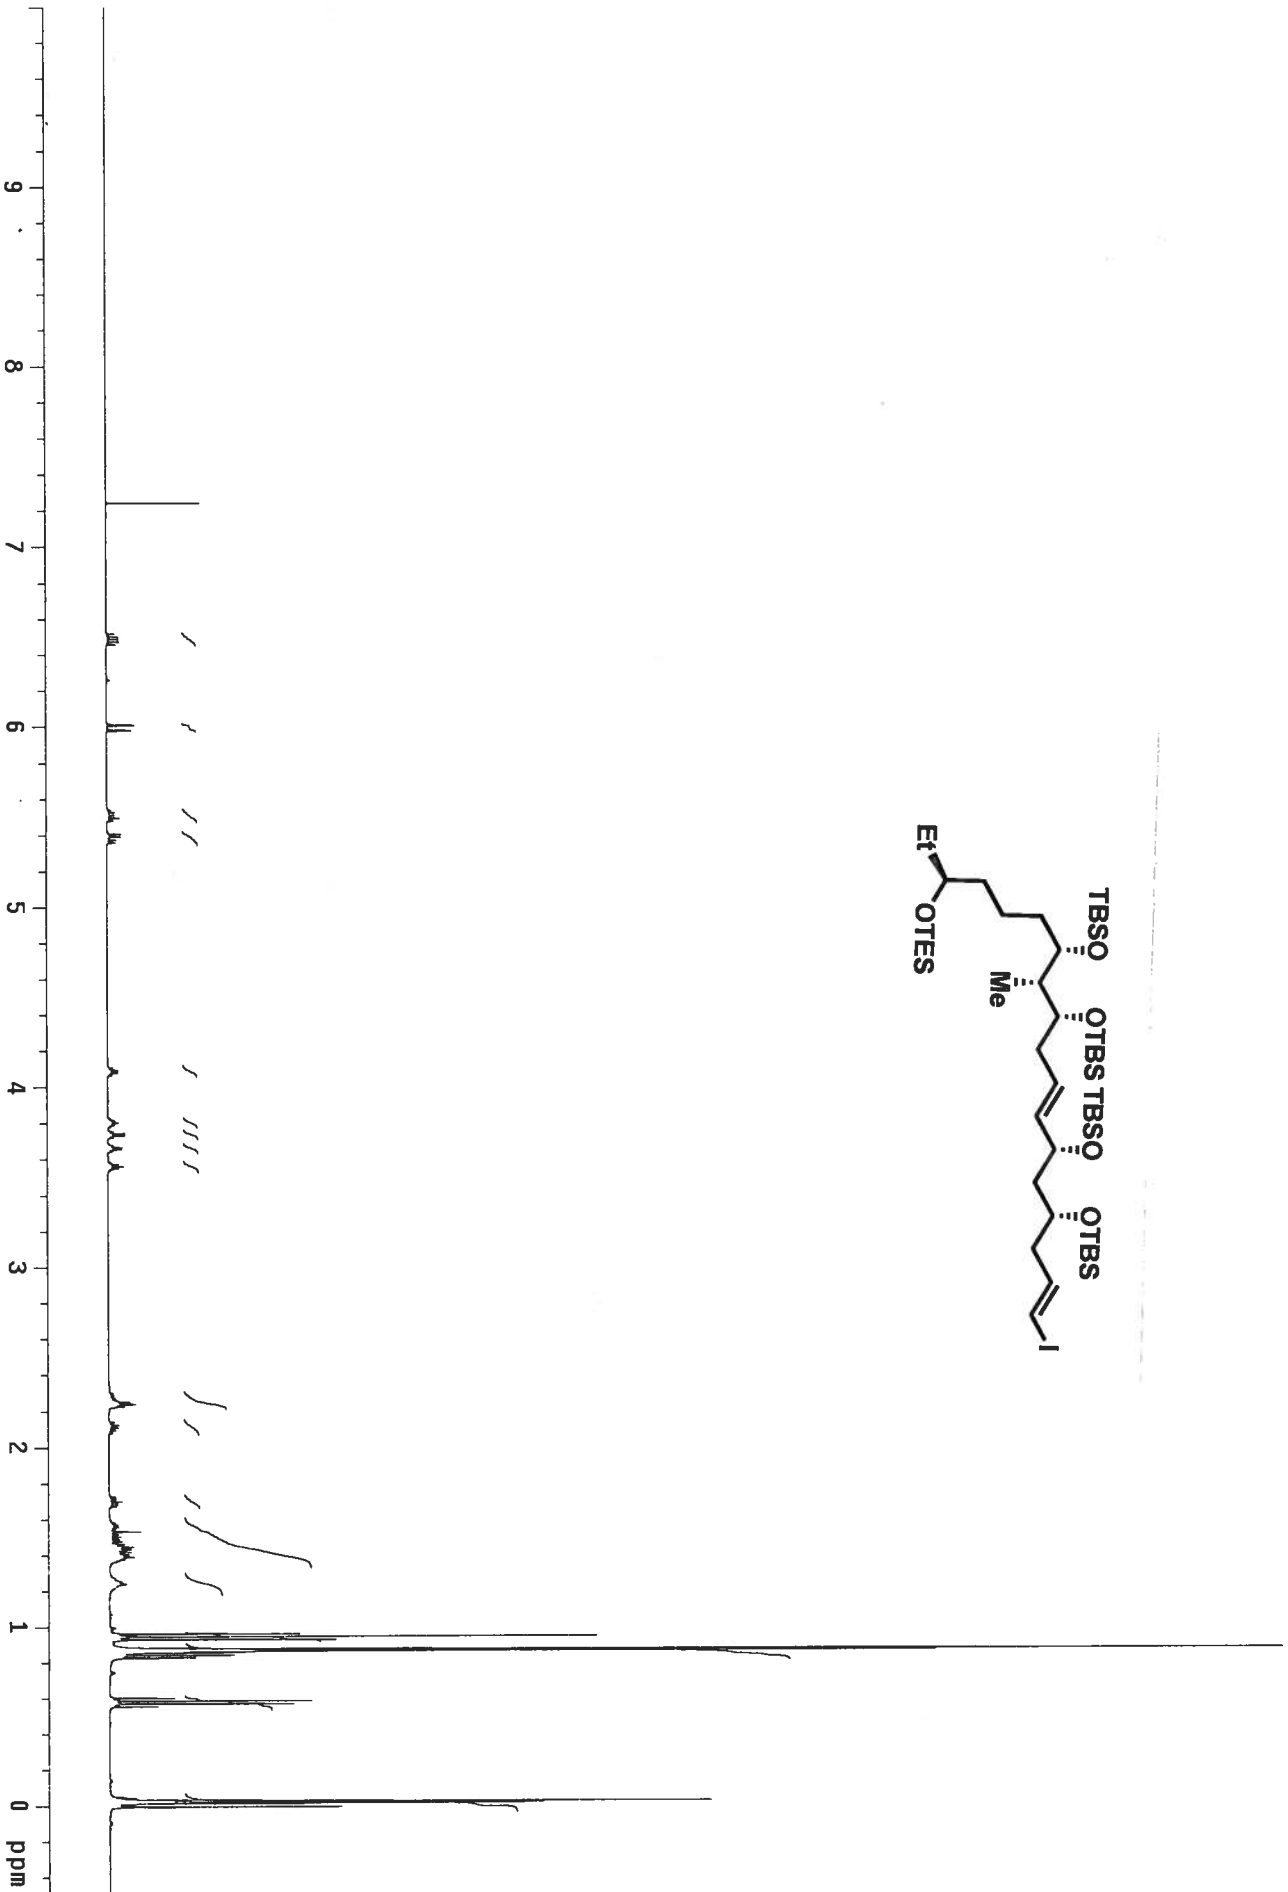

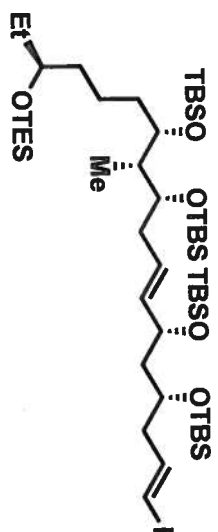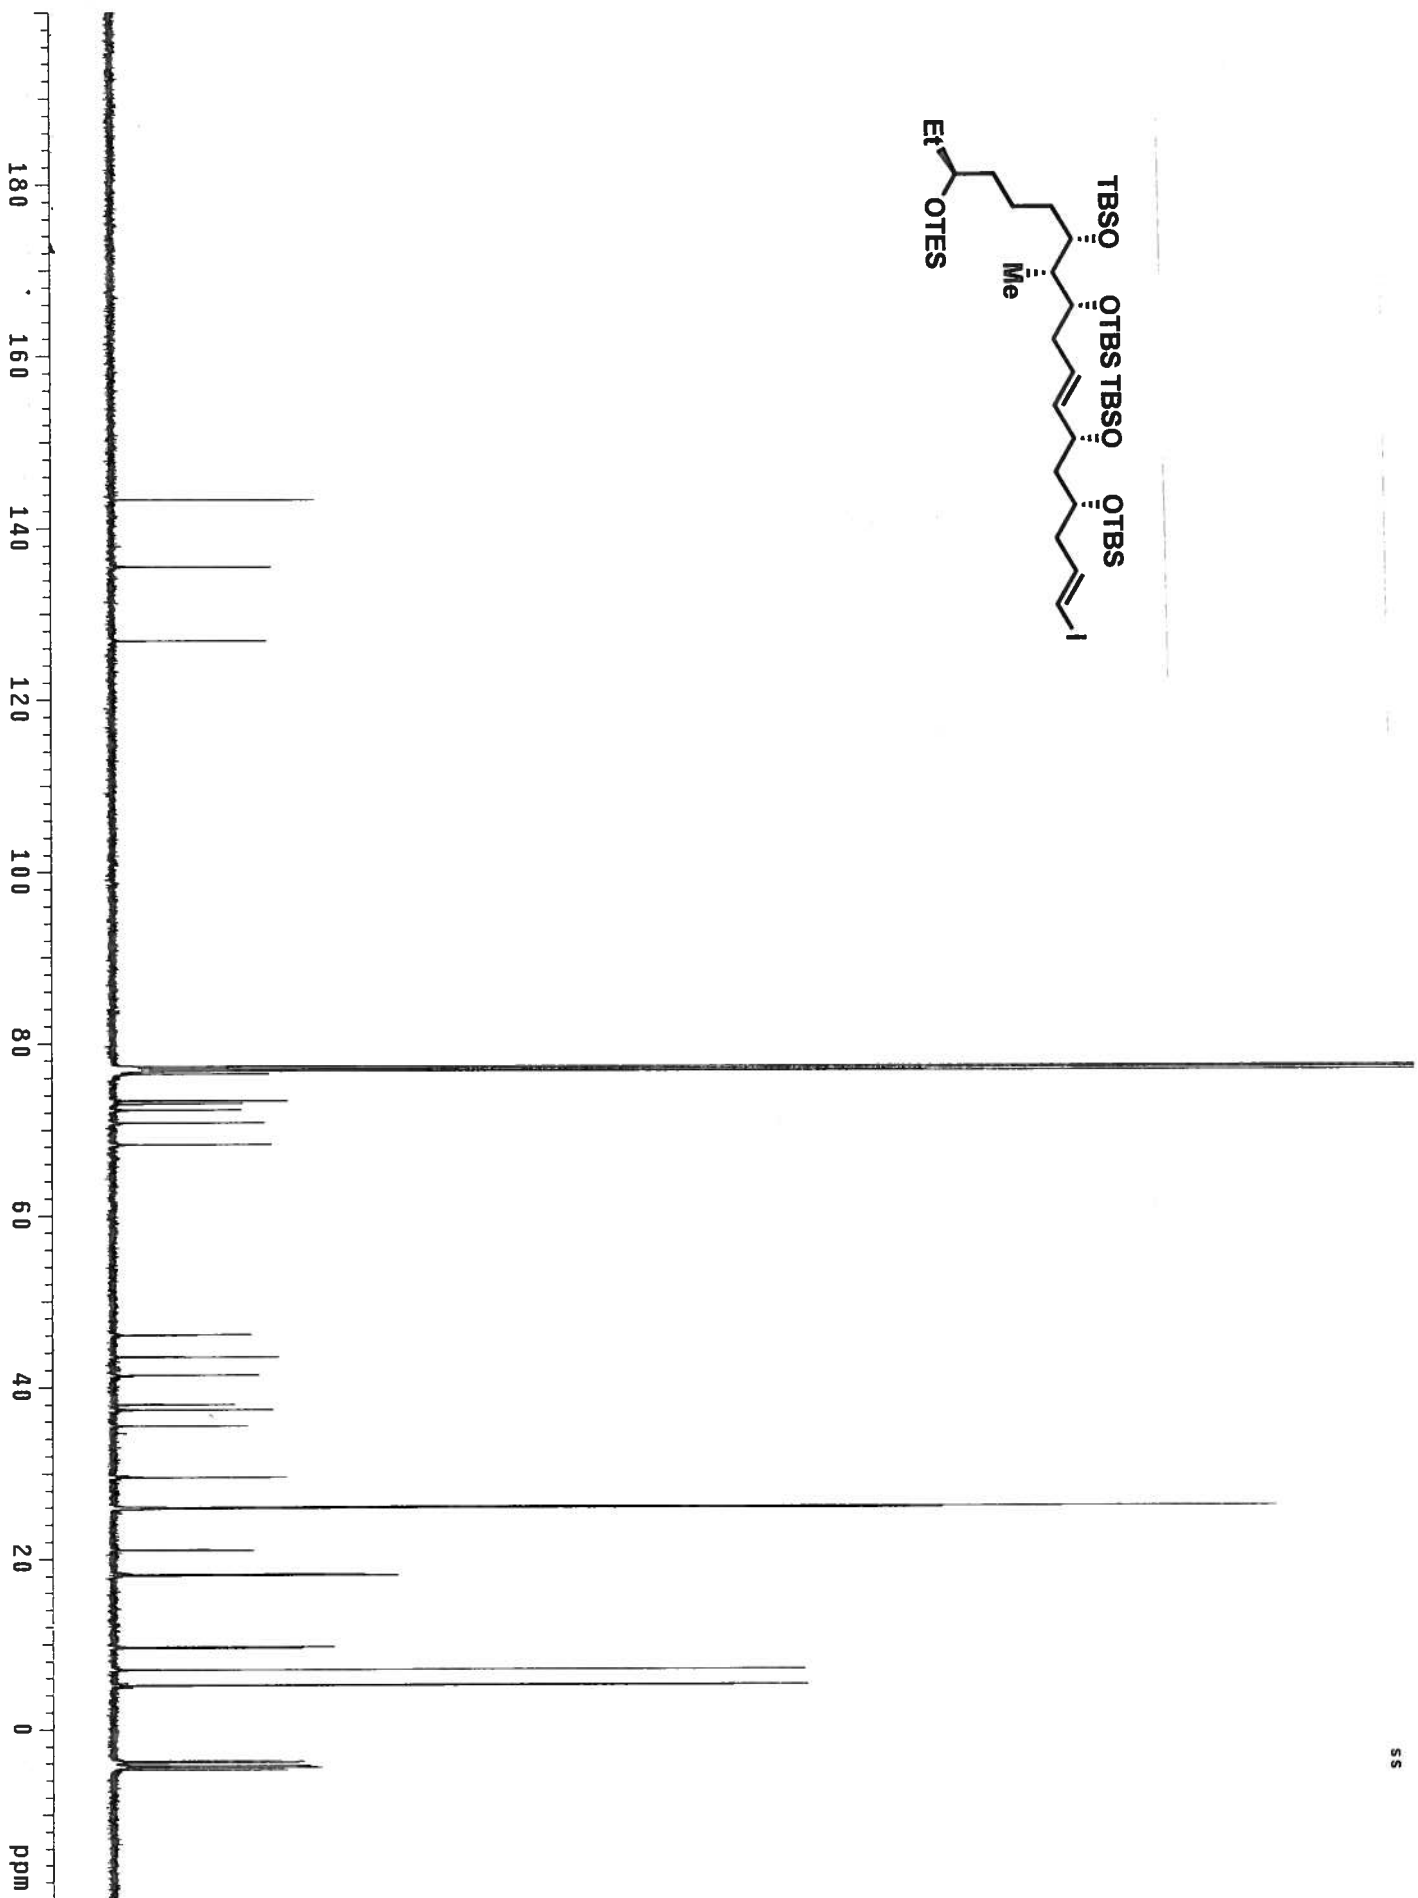

Single Mass Analysis

Tolerance = 5.0 PPM / DBE: min = -150.0, max = 150.0

Selected filters: None

Monoisotopic Mass, Odd and Even Electron Ions

21 formula(e) evaluated with 1 results within limits (up to 50 closest results for each mass)

Elements Used:

C: 0-250 H: 0-250 O: 5-5 Si: 5-5 I: 1-1

HJ05-108

LIU4652\_1U 253 (6.354) Cn (Cen,5, 80.00, Ht); Cm (253:259)

25-Apr-2006  
100 Deg C  
Voltage Cl+  
=186

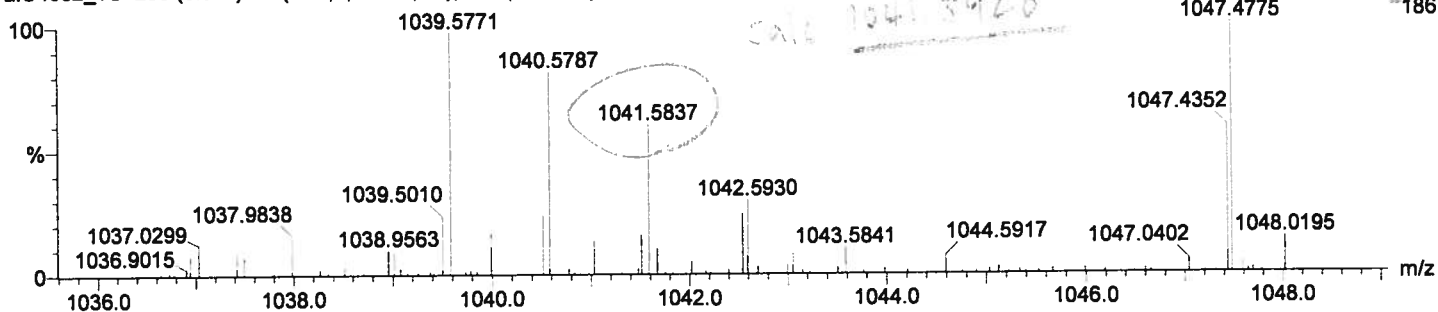

Minimum: -150.0  
Maximum: 500.0 5.0 150.0

| Mass      | Calc. Mass | mDa  | PPM  | DBE | i-FIT | Formula           |
|-----------|------------|------|------|-----|-------|-------------------|
| 1039.5771 | 1039.5775  | -0.4 | -0.4 | 2.5 | 1.5   | C49 H104 O5 Si5 I |

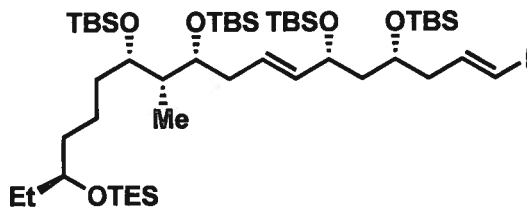

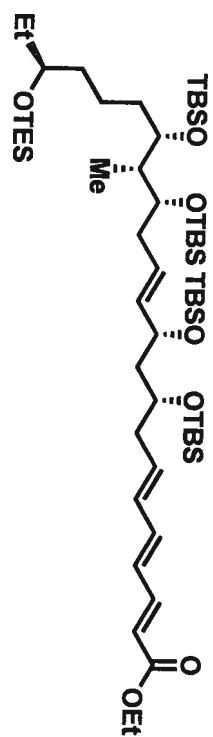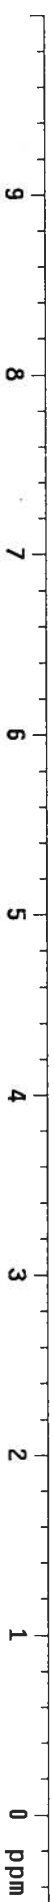

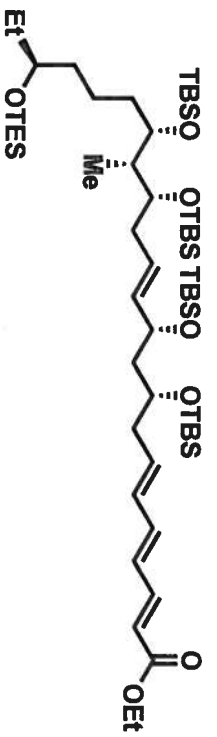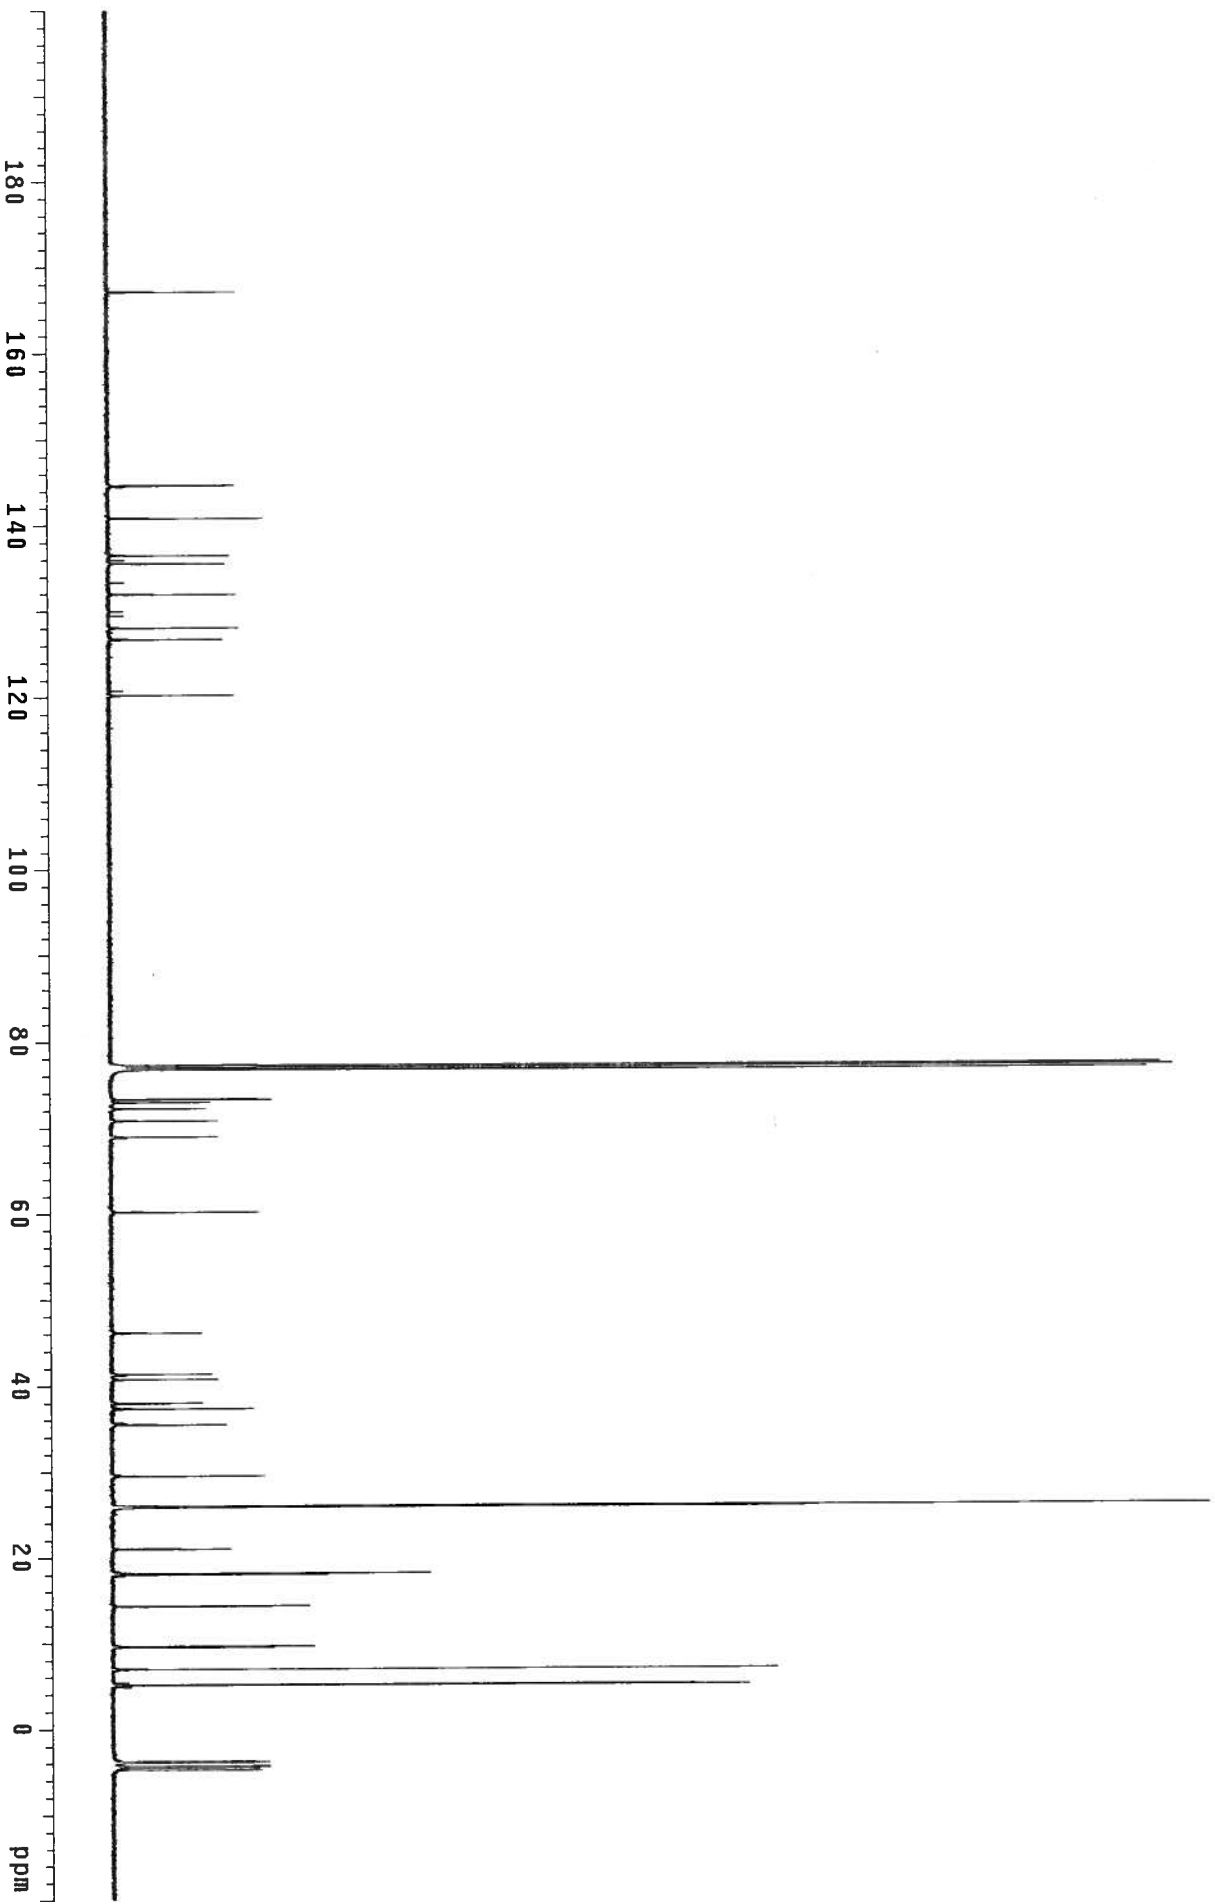

Single Mass Analysis

Tolerance = 50.0 PPM / DBE: min = -1.5, max = 50.0

Selected filters: None

Monoisotopic Mass, Odd and Even Electron Ions

11 formula(e) evaluated with 1 results within limits (up to 50 closest results for each mass)

Elements Used:

C: 0-500 H: 0-250 O: 7-7 Si: 5-5

HJ05-050-2

LIU3897 152 (4.322) Cn (Cen,7, 80.00, Ht); Cm (150:302)

15-Mar-2006

Voltage CI-  
46.6

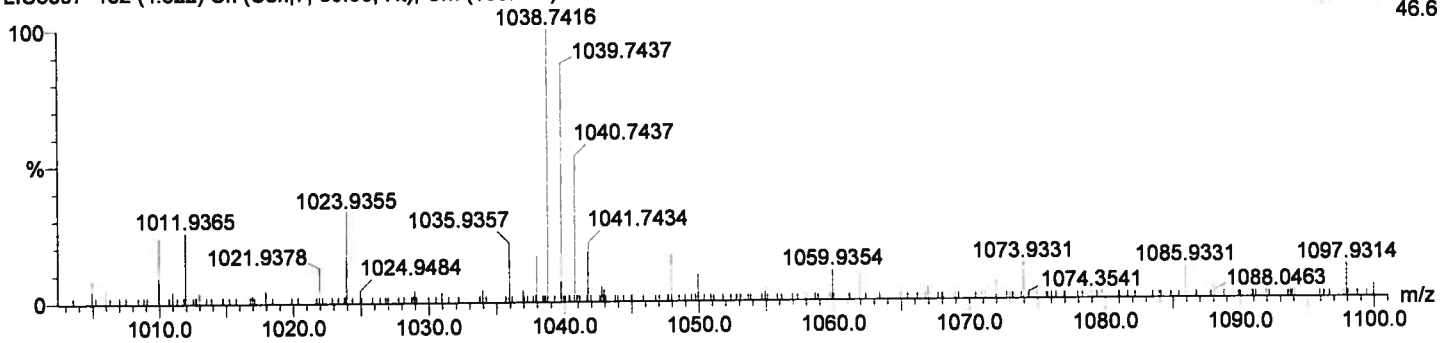

Minimum: -1.5  
Maximum: 5.0 50.0 50.0

| Mass      | Calc. Mass | mDa | PPM | DBE | i-FIT | Formula         |
|-----------|------------|-----|-----|-----|-------|-----------------|
| 1038.7416 | 1038.7411  | 0.5 | 0.5 | 5.0 | 0.0   | C56 H114 O7 Si5 |

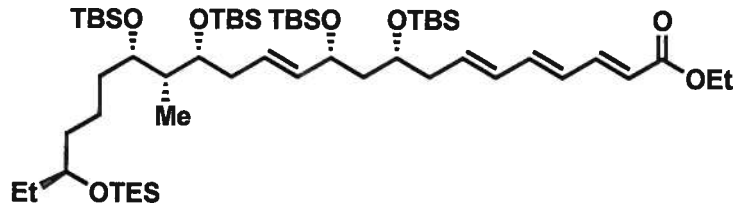

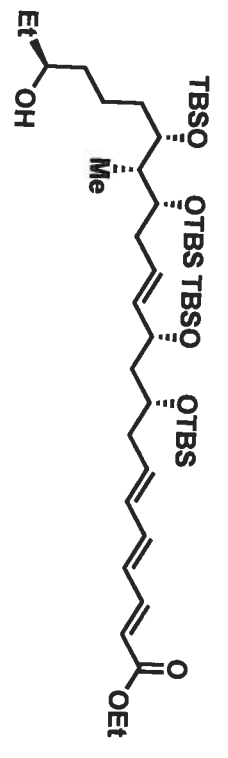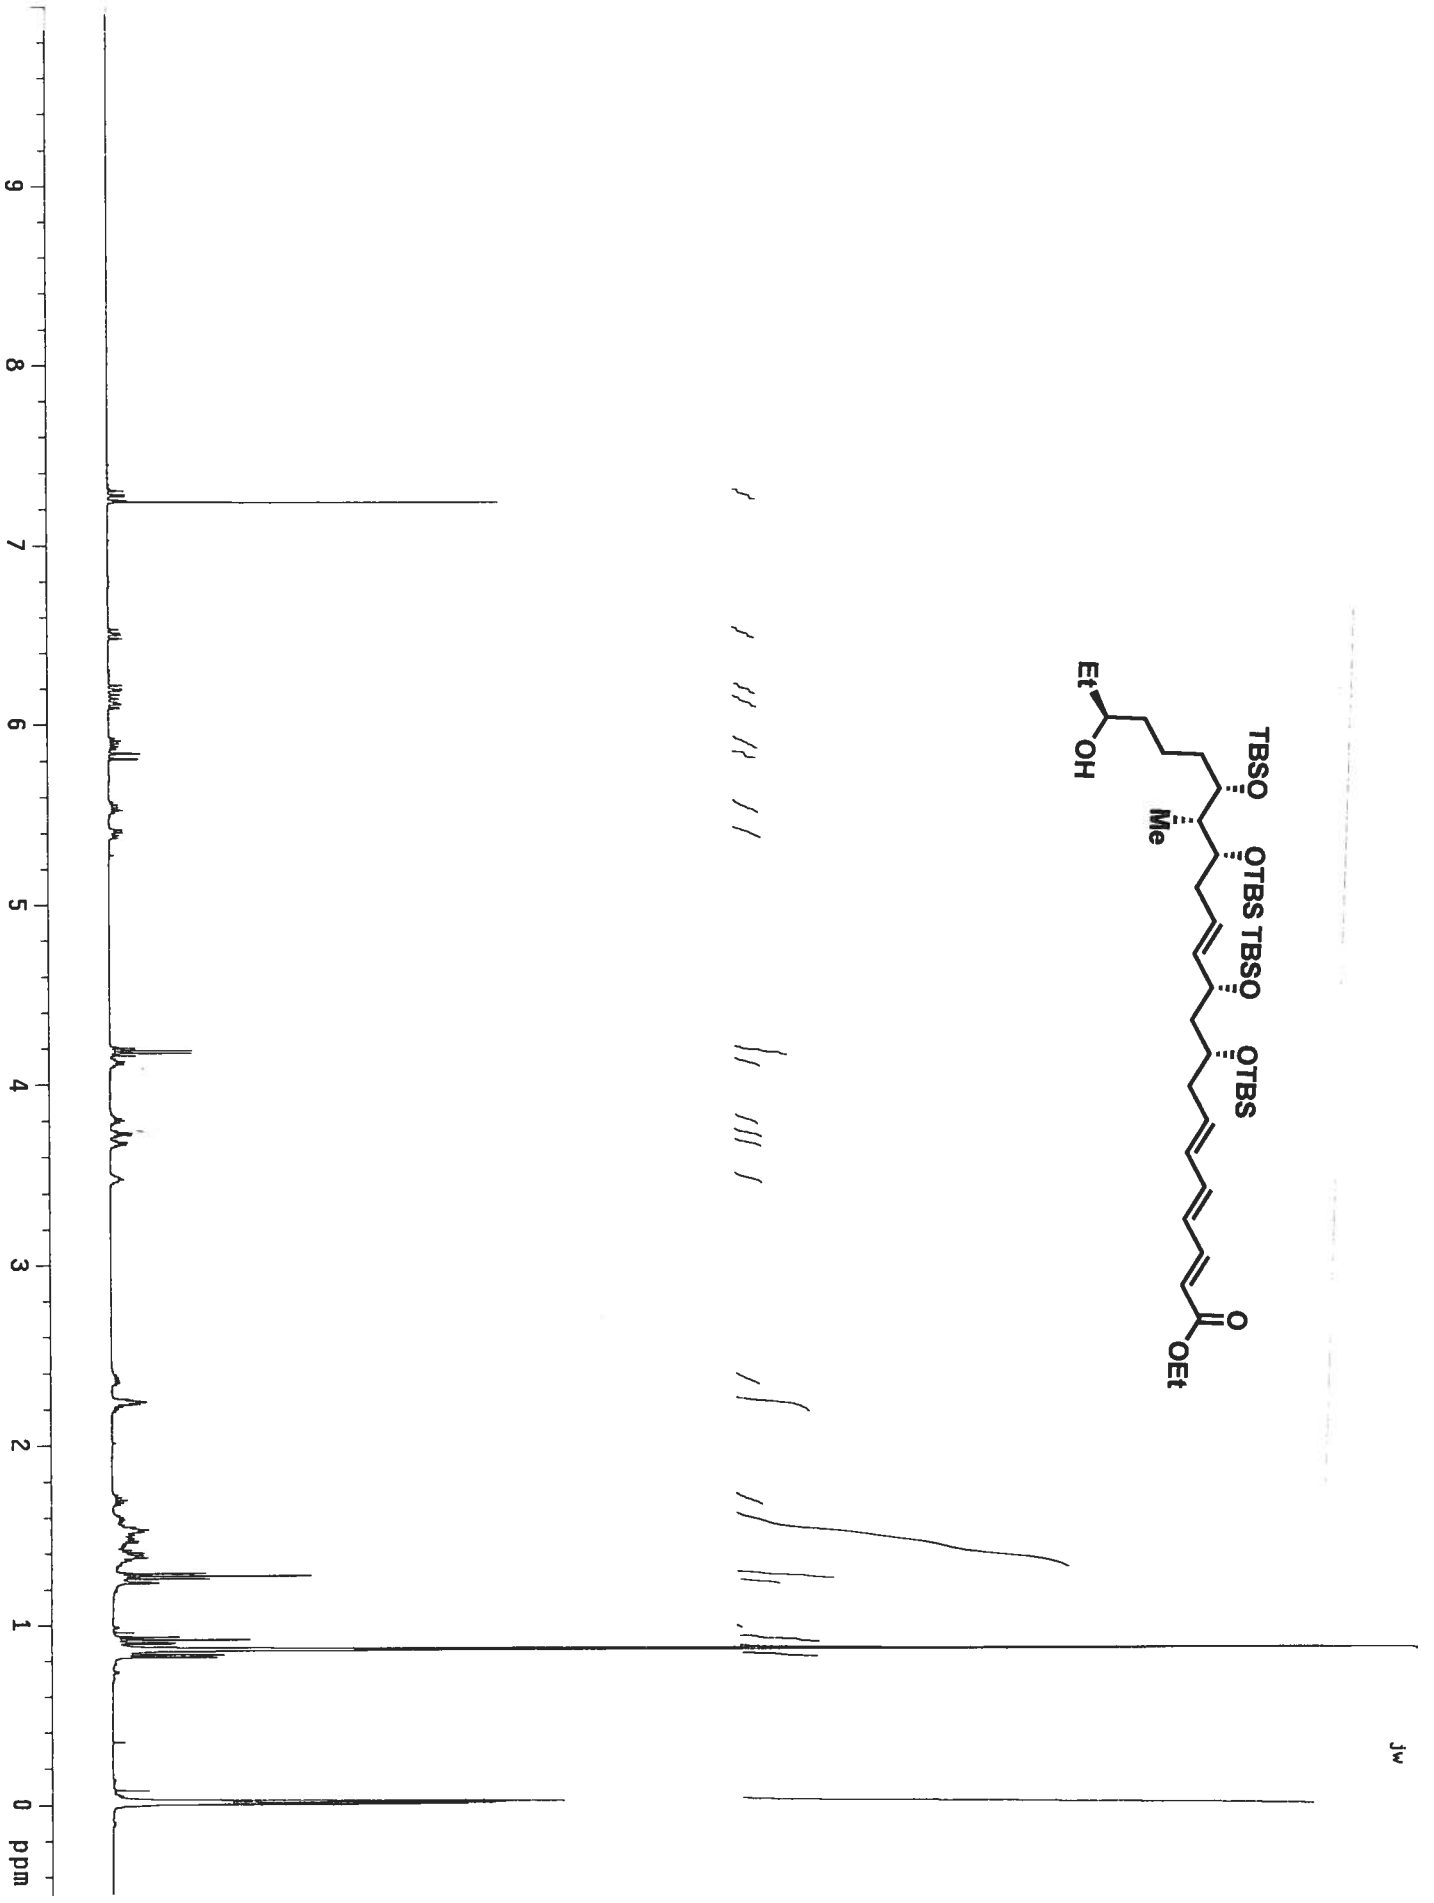





# Elemental Composition Report

## Single Mass Analysis

Tolerance = 5.0 PPM / DBE: min = -1.5, max = 50.0

Selected filters: None

Monoisotopic Mass, Odd and Even Electron Ions

10 formula(e) evaluated with 1 results within limits (up to 50 closest results for each mass)

Elements Used:

C: 0-500 H: 0-250 O: 7-7 Si: 4-4

HJ05-058

LIU3898 37 (1.052) Cn (Cen,7, 80.00, Ht); Cm (26:64)

15-Mar-2006  
Voltage Cl-  
1.44e3

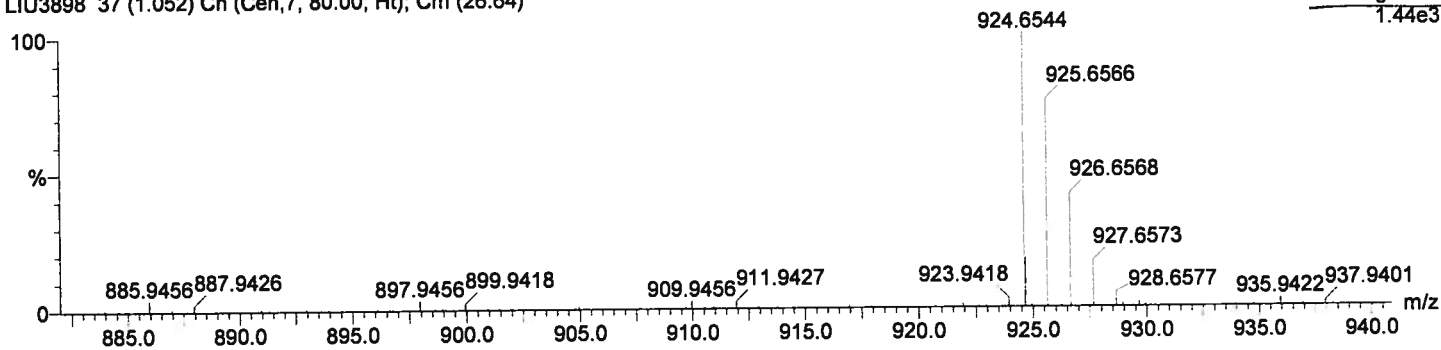

Minimum: -1.5  
Maximum: 5.0 5.0 50.0

| Mass     | Calc. Mass | mDa  | PPM  | DBE | i-FIT | Formula         |
|----------|------------|------|------|-----|-------|-----------------|
| 924.6544 | 924.6546   | -0.2 | -0.2 | 5.0 | 1.0   | C50 H100 O7 Si4 |

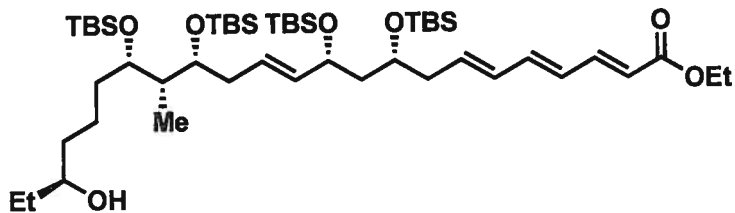

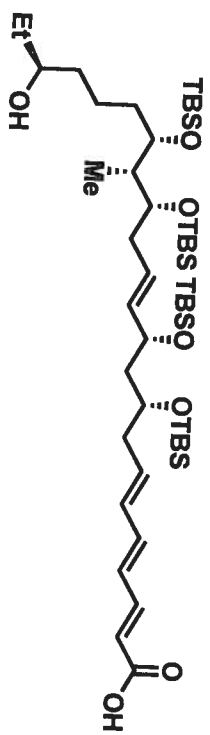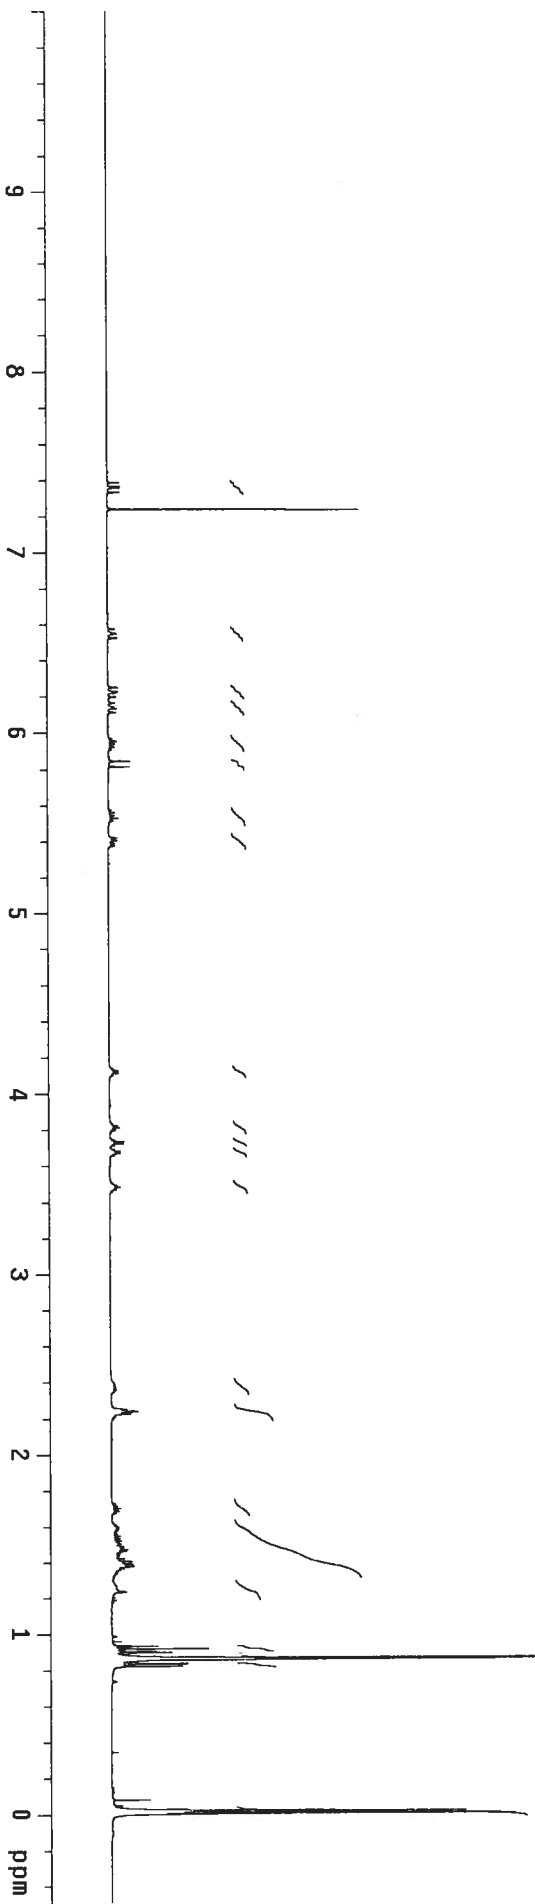

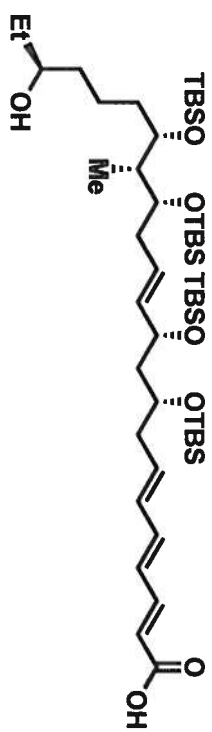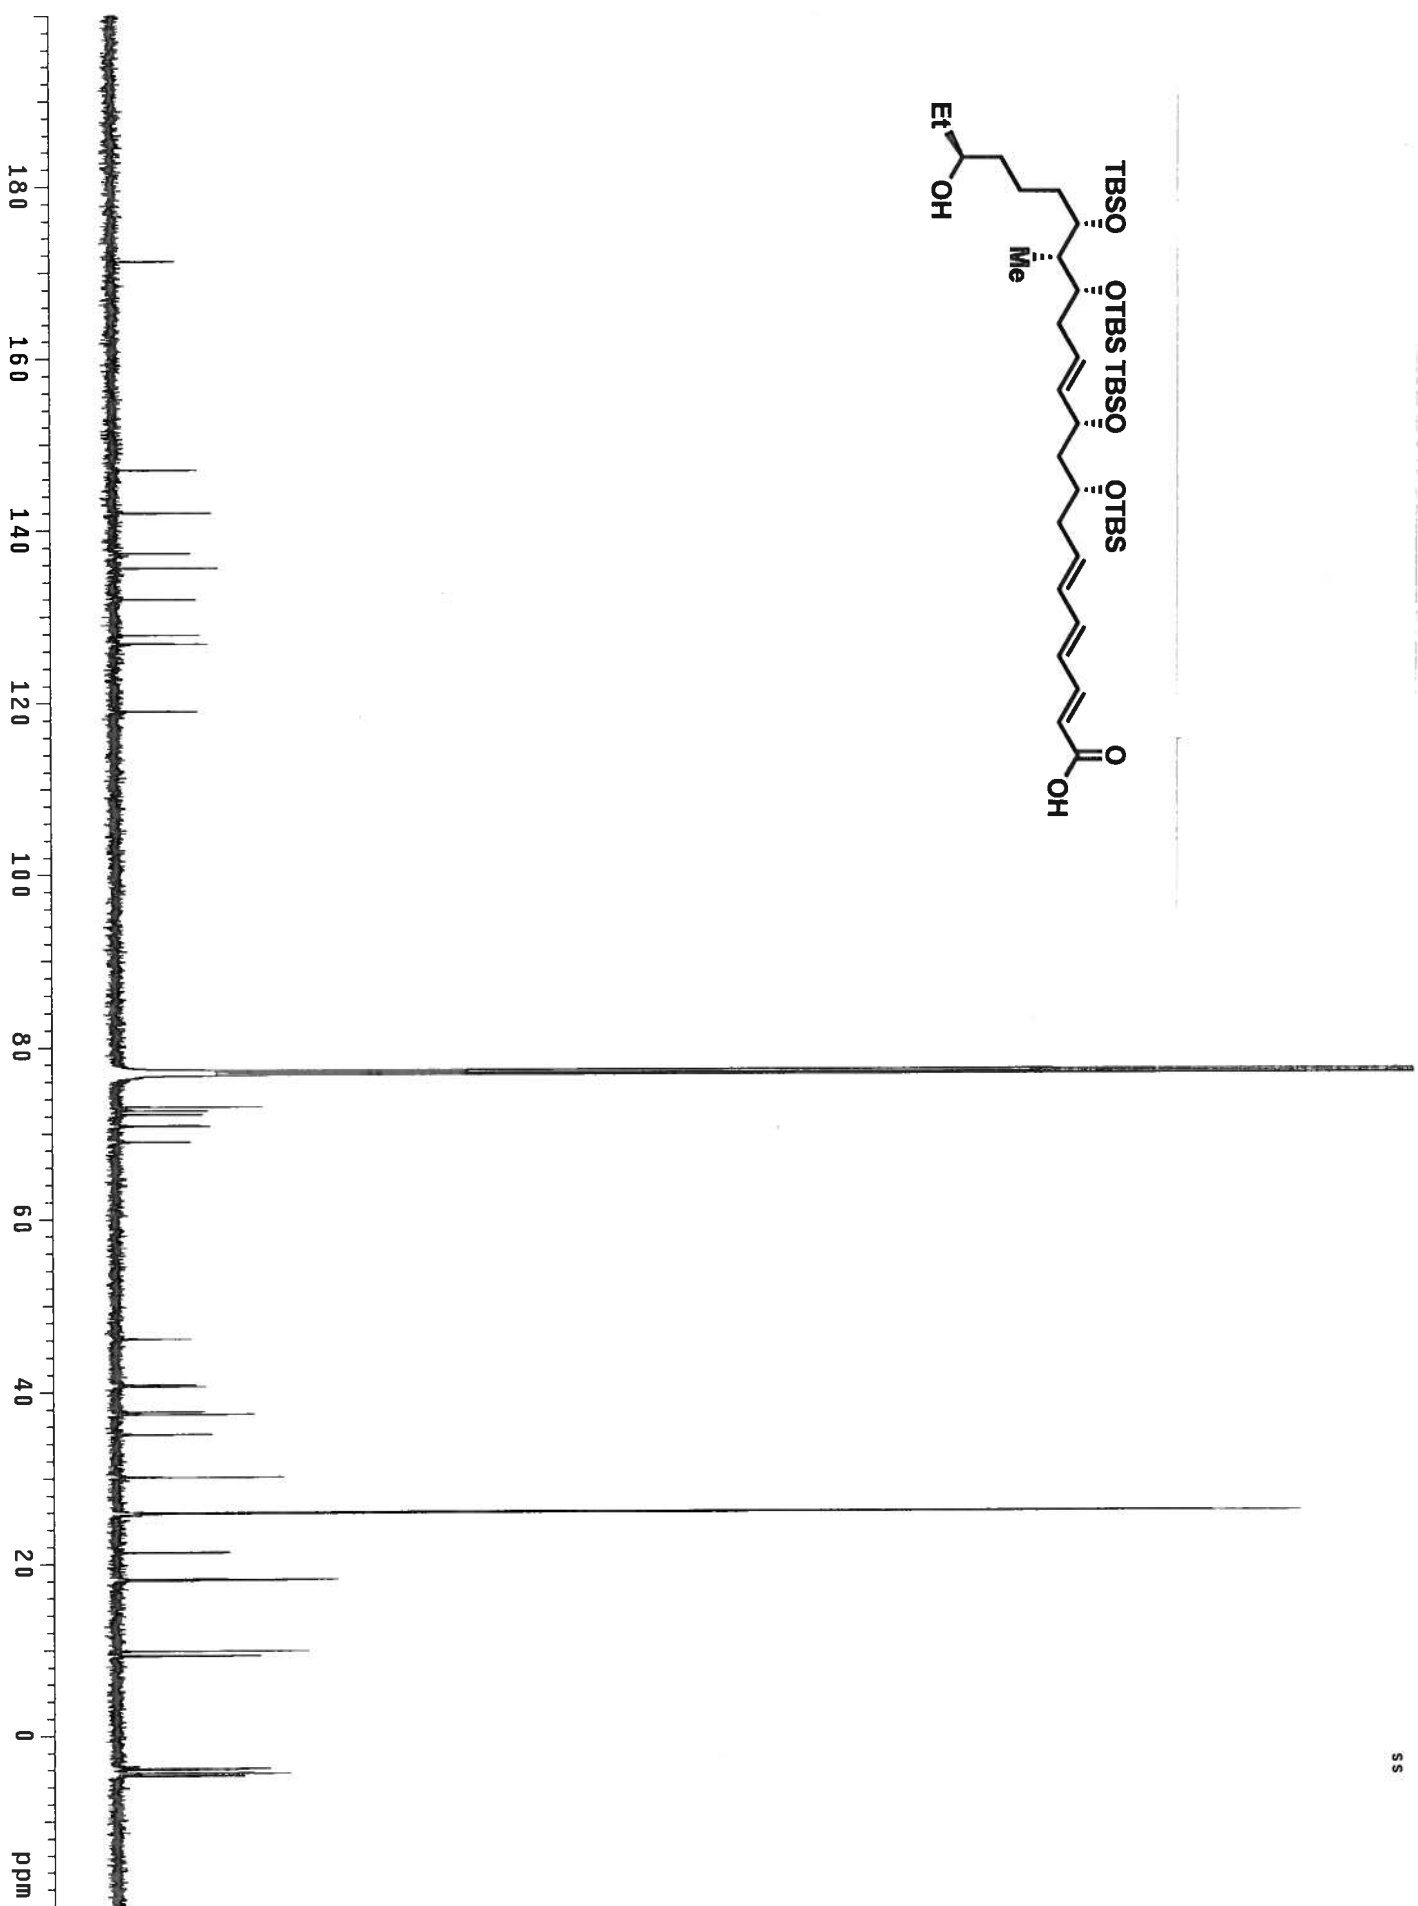

Single Mass Analysis

Tolerance = 5.0 PPM / DBE: min = -1.5, max = 50.0

Selected filters: None

Monoisotopic Mass, Odd and Even Electron Ions

10 formula(e) evaluated with 1 results within limits (up to 50 closest results for each mass)

Elements Used:

C: 0-500 H: 0-250 O: 7-7 Si: 4-4

HJ05-054

LIU3899\_1 66 (1.877) Cn (Gen,7, 80.00, Ht); Cm (66:89)

15-Mar-2006

Voltage Cl-  
4.25e3

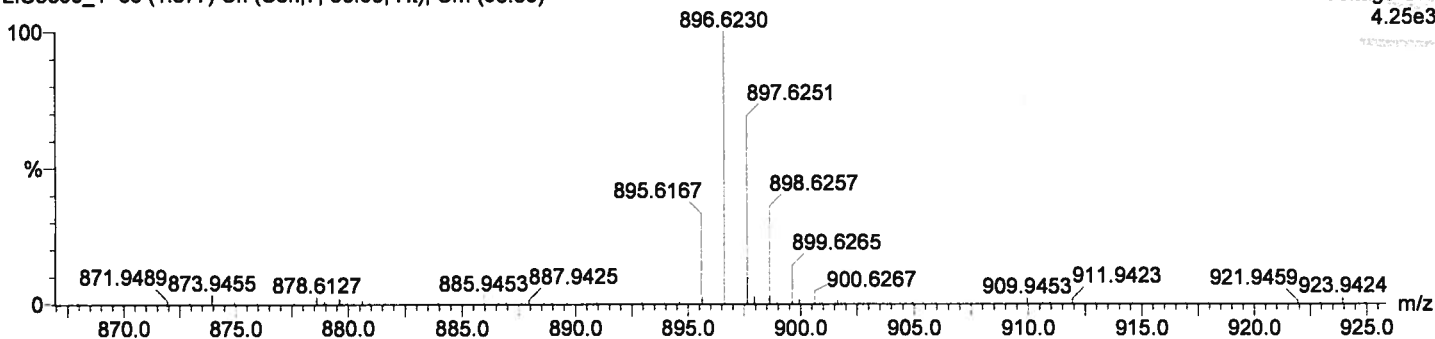

Minimum: -1.5  
Maximum: 5.0 5.0 50.0

| Mass     | Calc. Mass | mDa  | PPM  | DBE | i-FIT | Formula        |
|----------|------------|------|------|-----|-------|----------------|
| 896.6230 | 896.6233   | -0.3 | -0.3 | 5.0 | 18.8  | C48 H96 O7 Si4 |

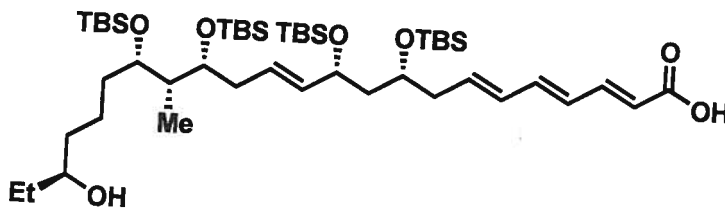

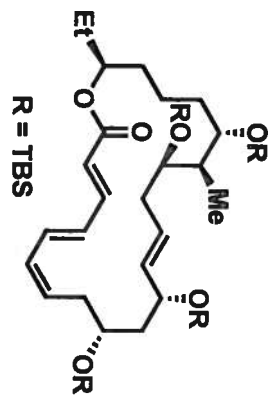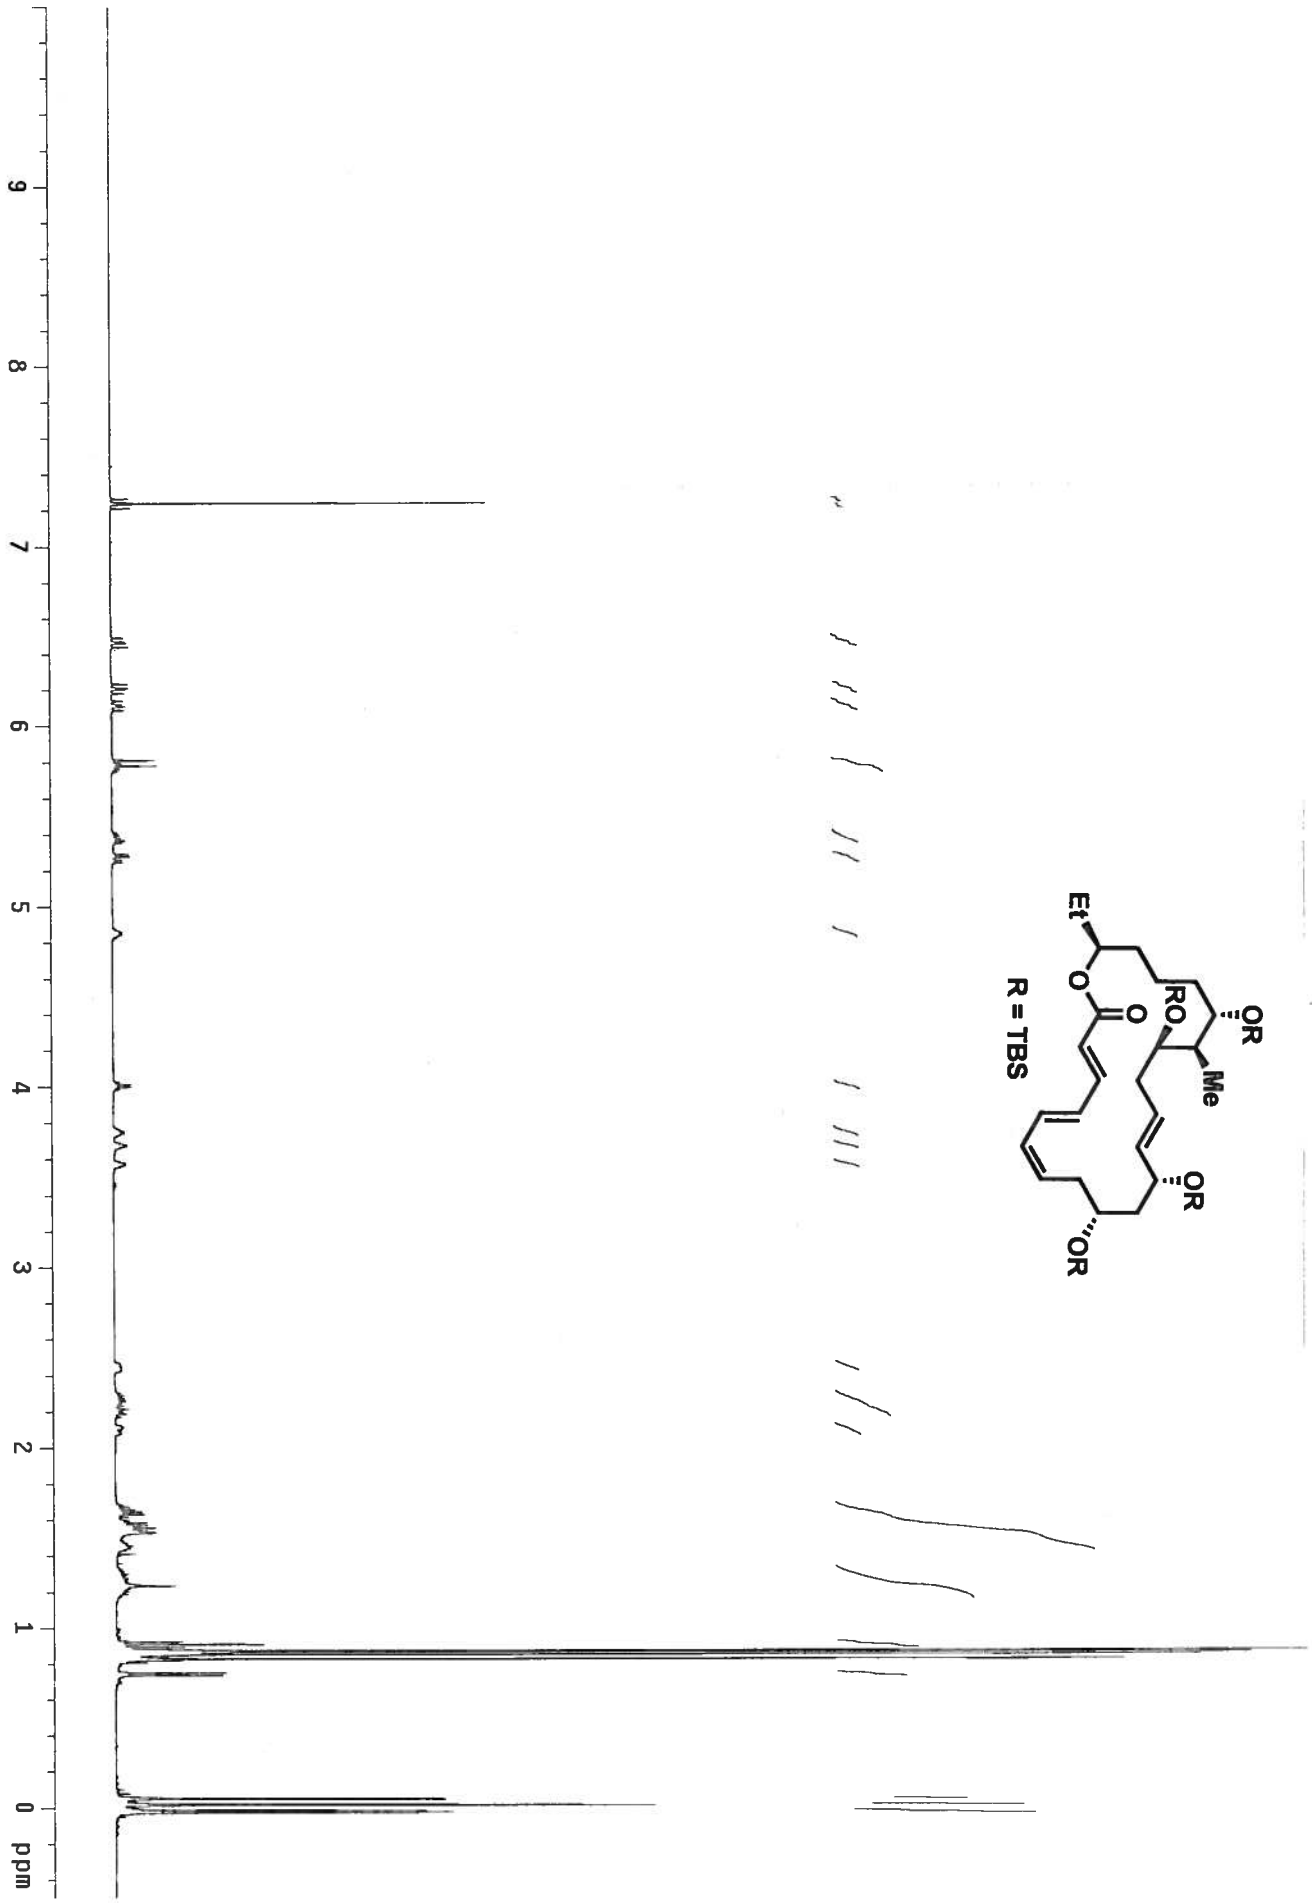

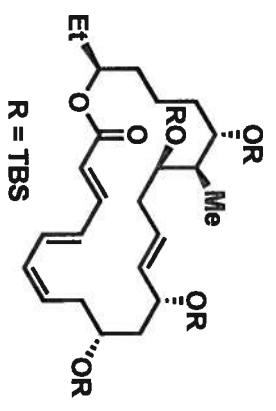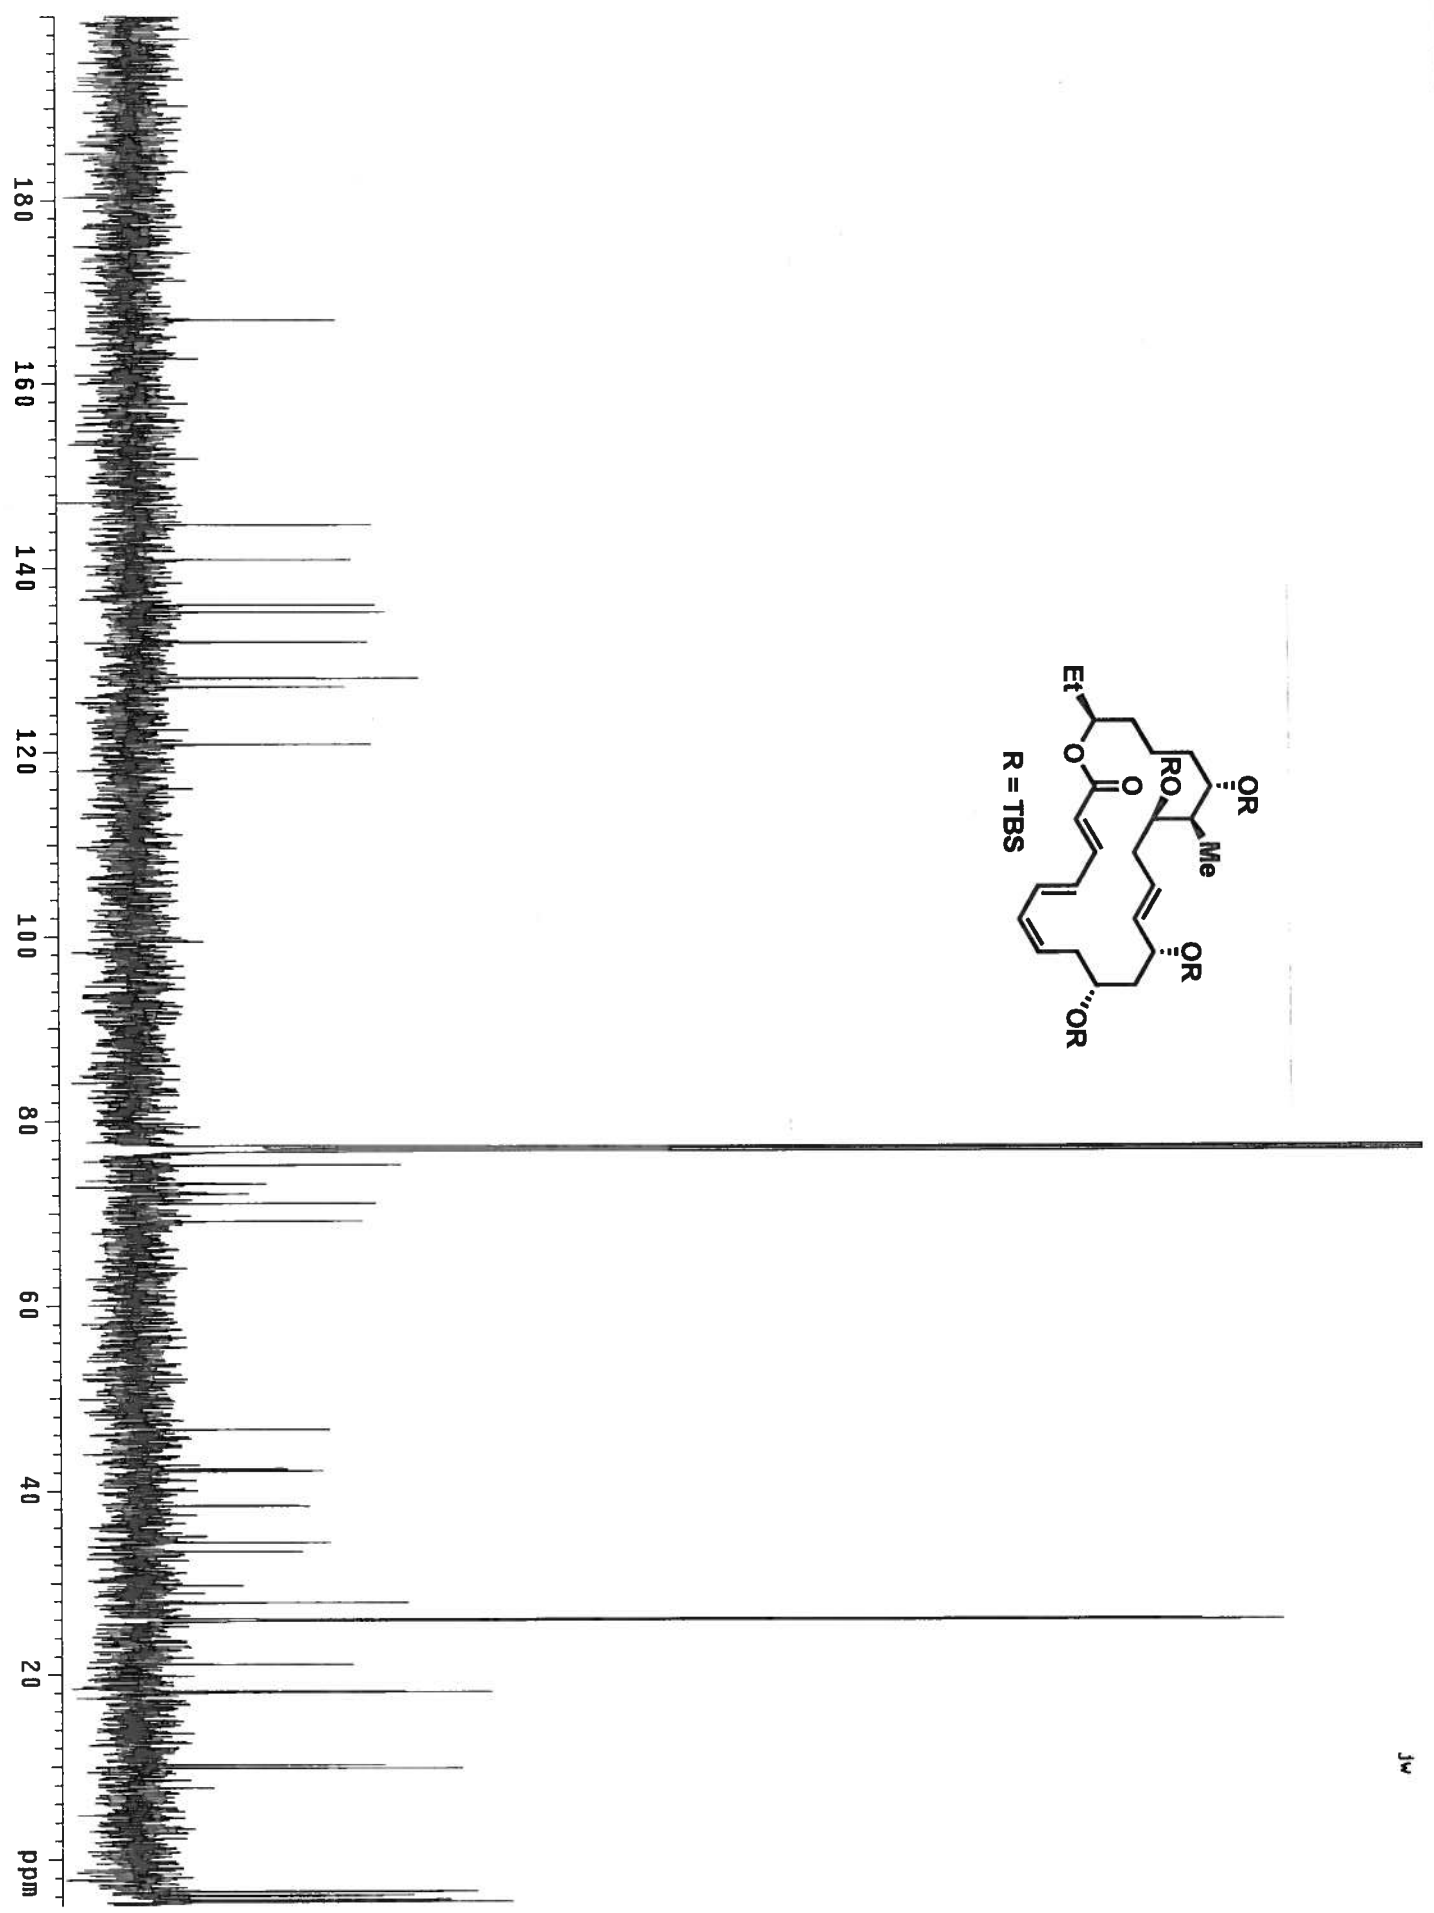

Single Mass Analysis

Tolerance = 5.0 PPM / DBE: min = -50.0, max = 100.0

Selected filters: None

Monoisotopic Mass, Odd and Even Electron Ions

17 formula(e) evaluated with 1 results within limits (up to 50 closest results for each mass)

Elements Used:

C: 0-250 H: 0-250 O: 6-6 Si: 4-4

HJ05-074

LIU4149\_1 22 (0.626) Cn (Gen,3, 80.00, Ht); Cm (3:23)

23-Mar-2006

Voltage Cl-

132

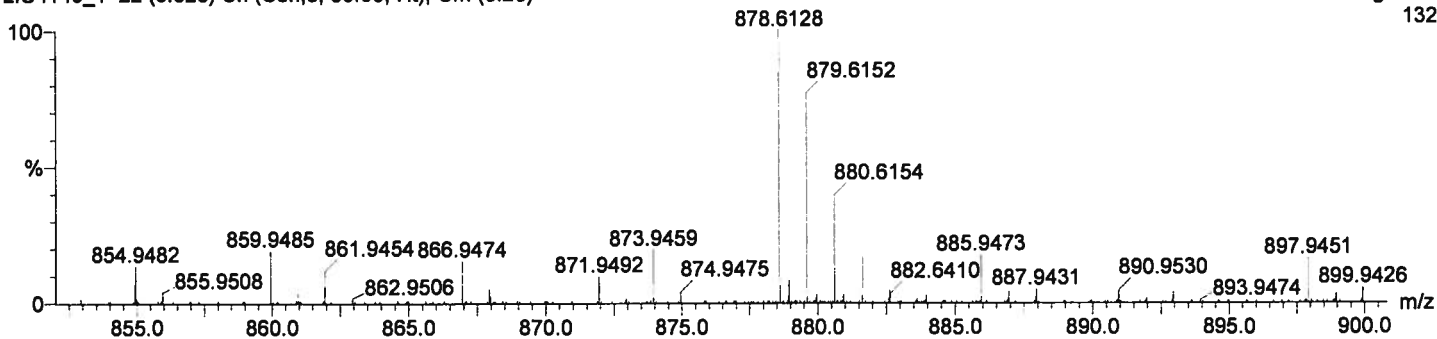

Minimum: -50.0  
Maximum: 500.0 5.0 100.0

| Mass     | Calc. Mass | mDa | PPM | DBE | i-FIT | Formula        |
|----------|------------|-----|-----|-----|-------|----------------|
| 878.6128 | 878.6128   | 0.0 | 0.0 | 6.0 | 0.2   | C48 H94 O6 Si4 |

M<sup>+</sup>

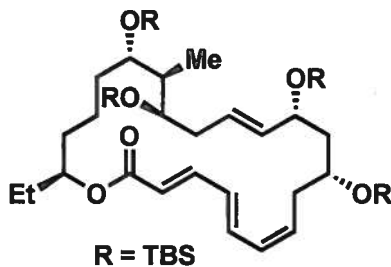

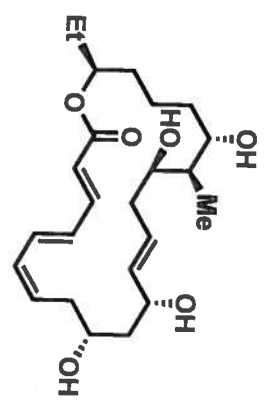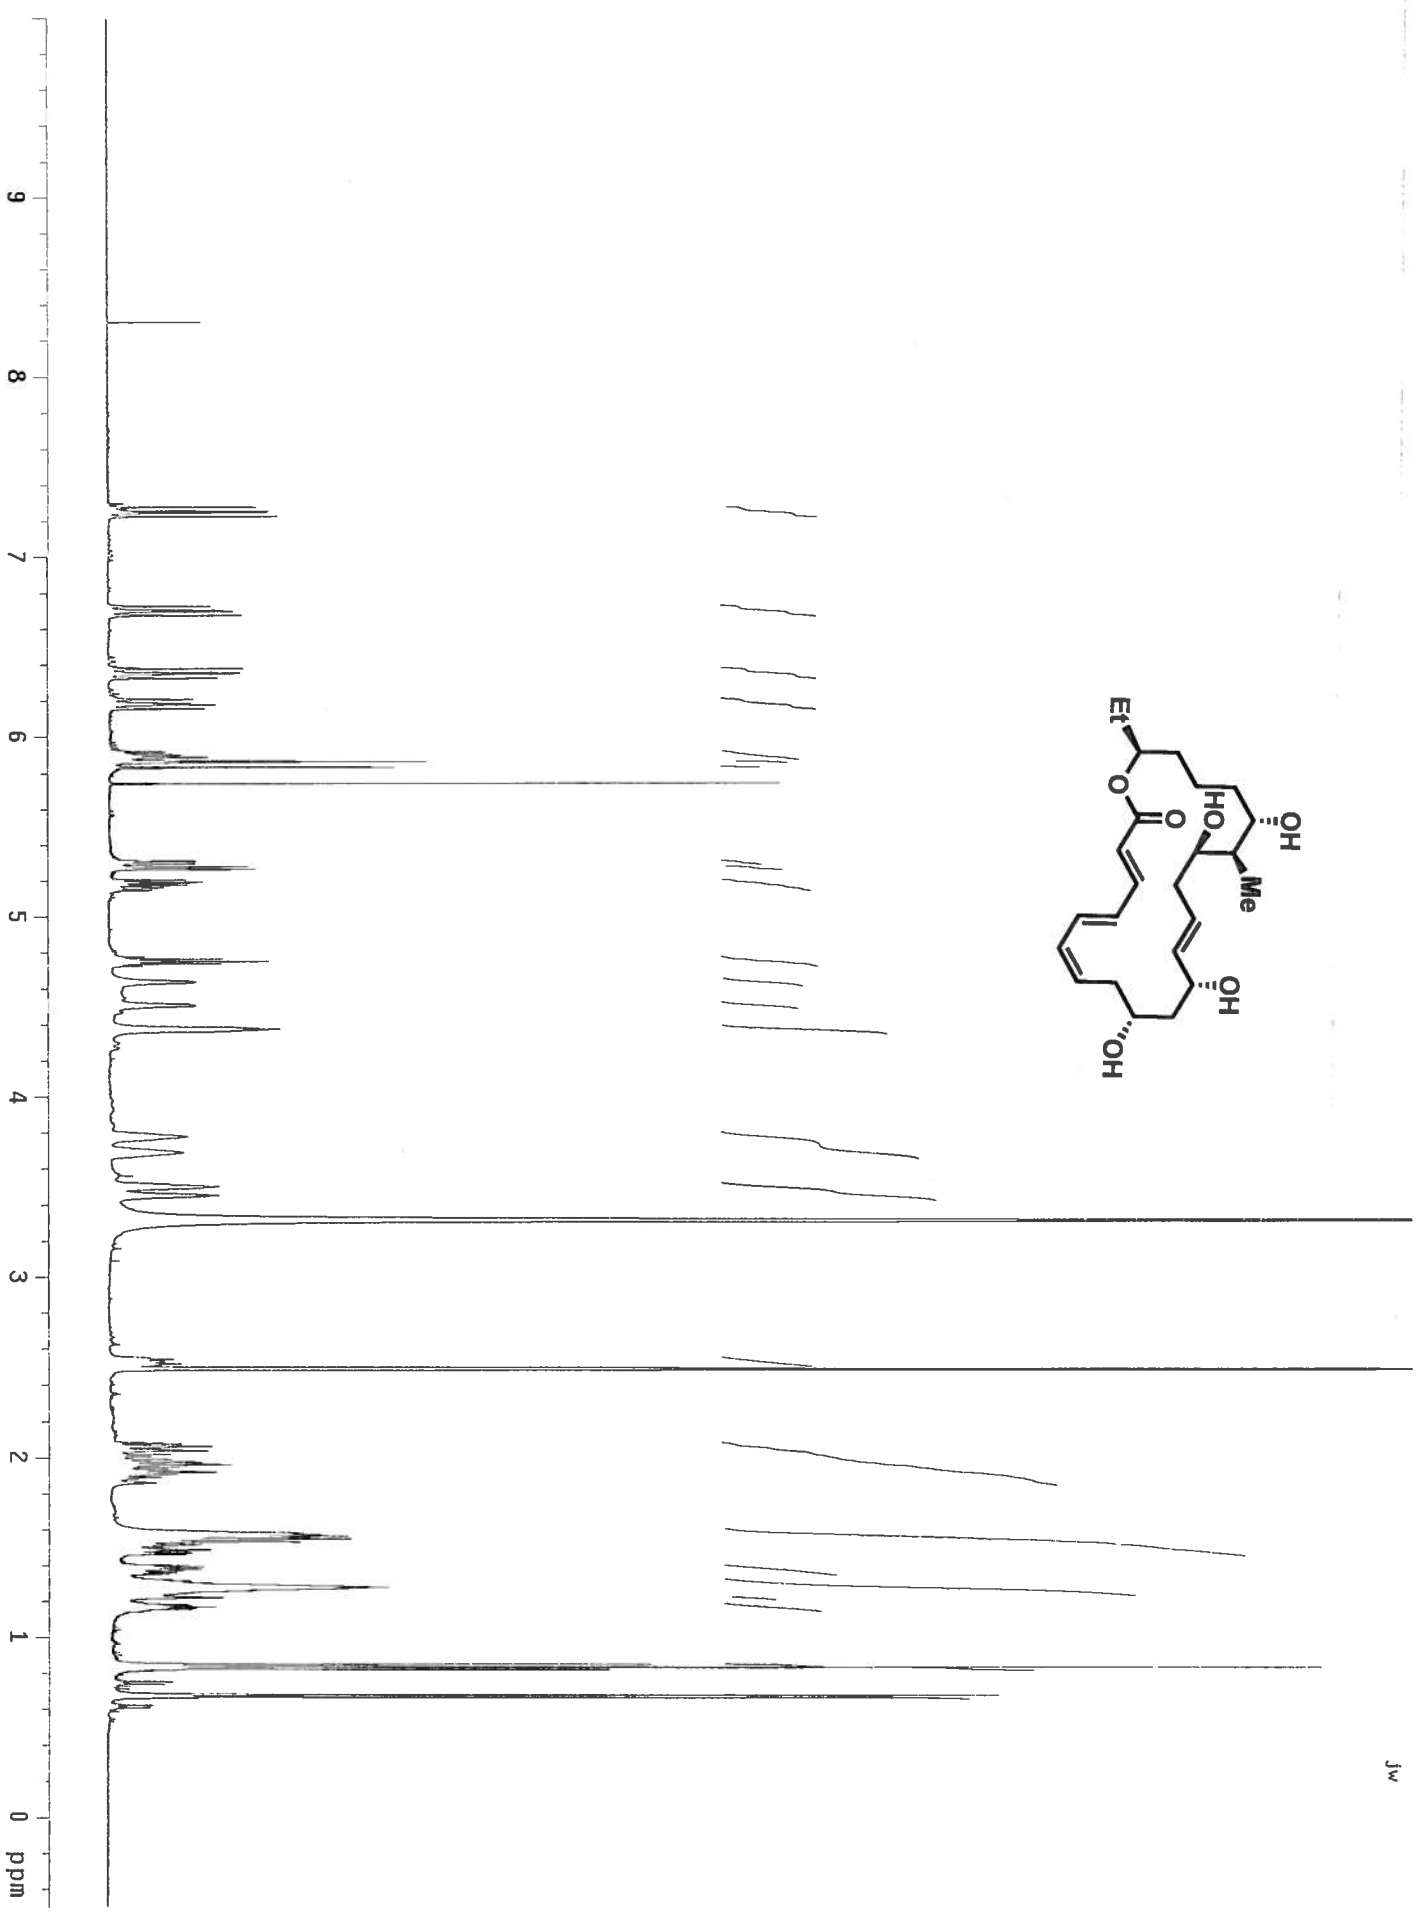



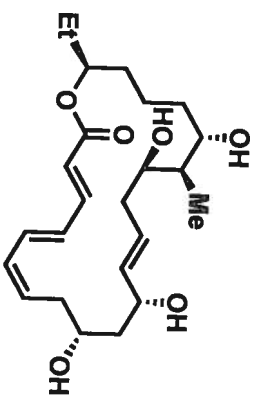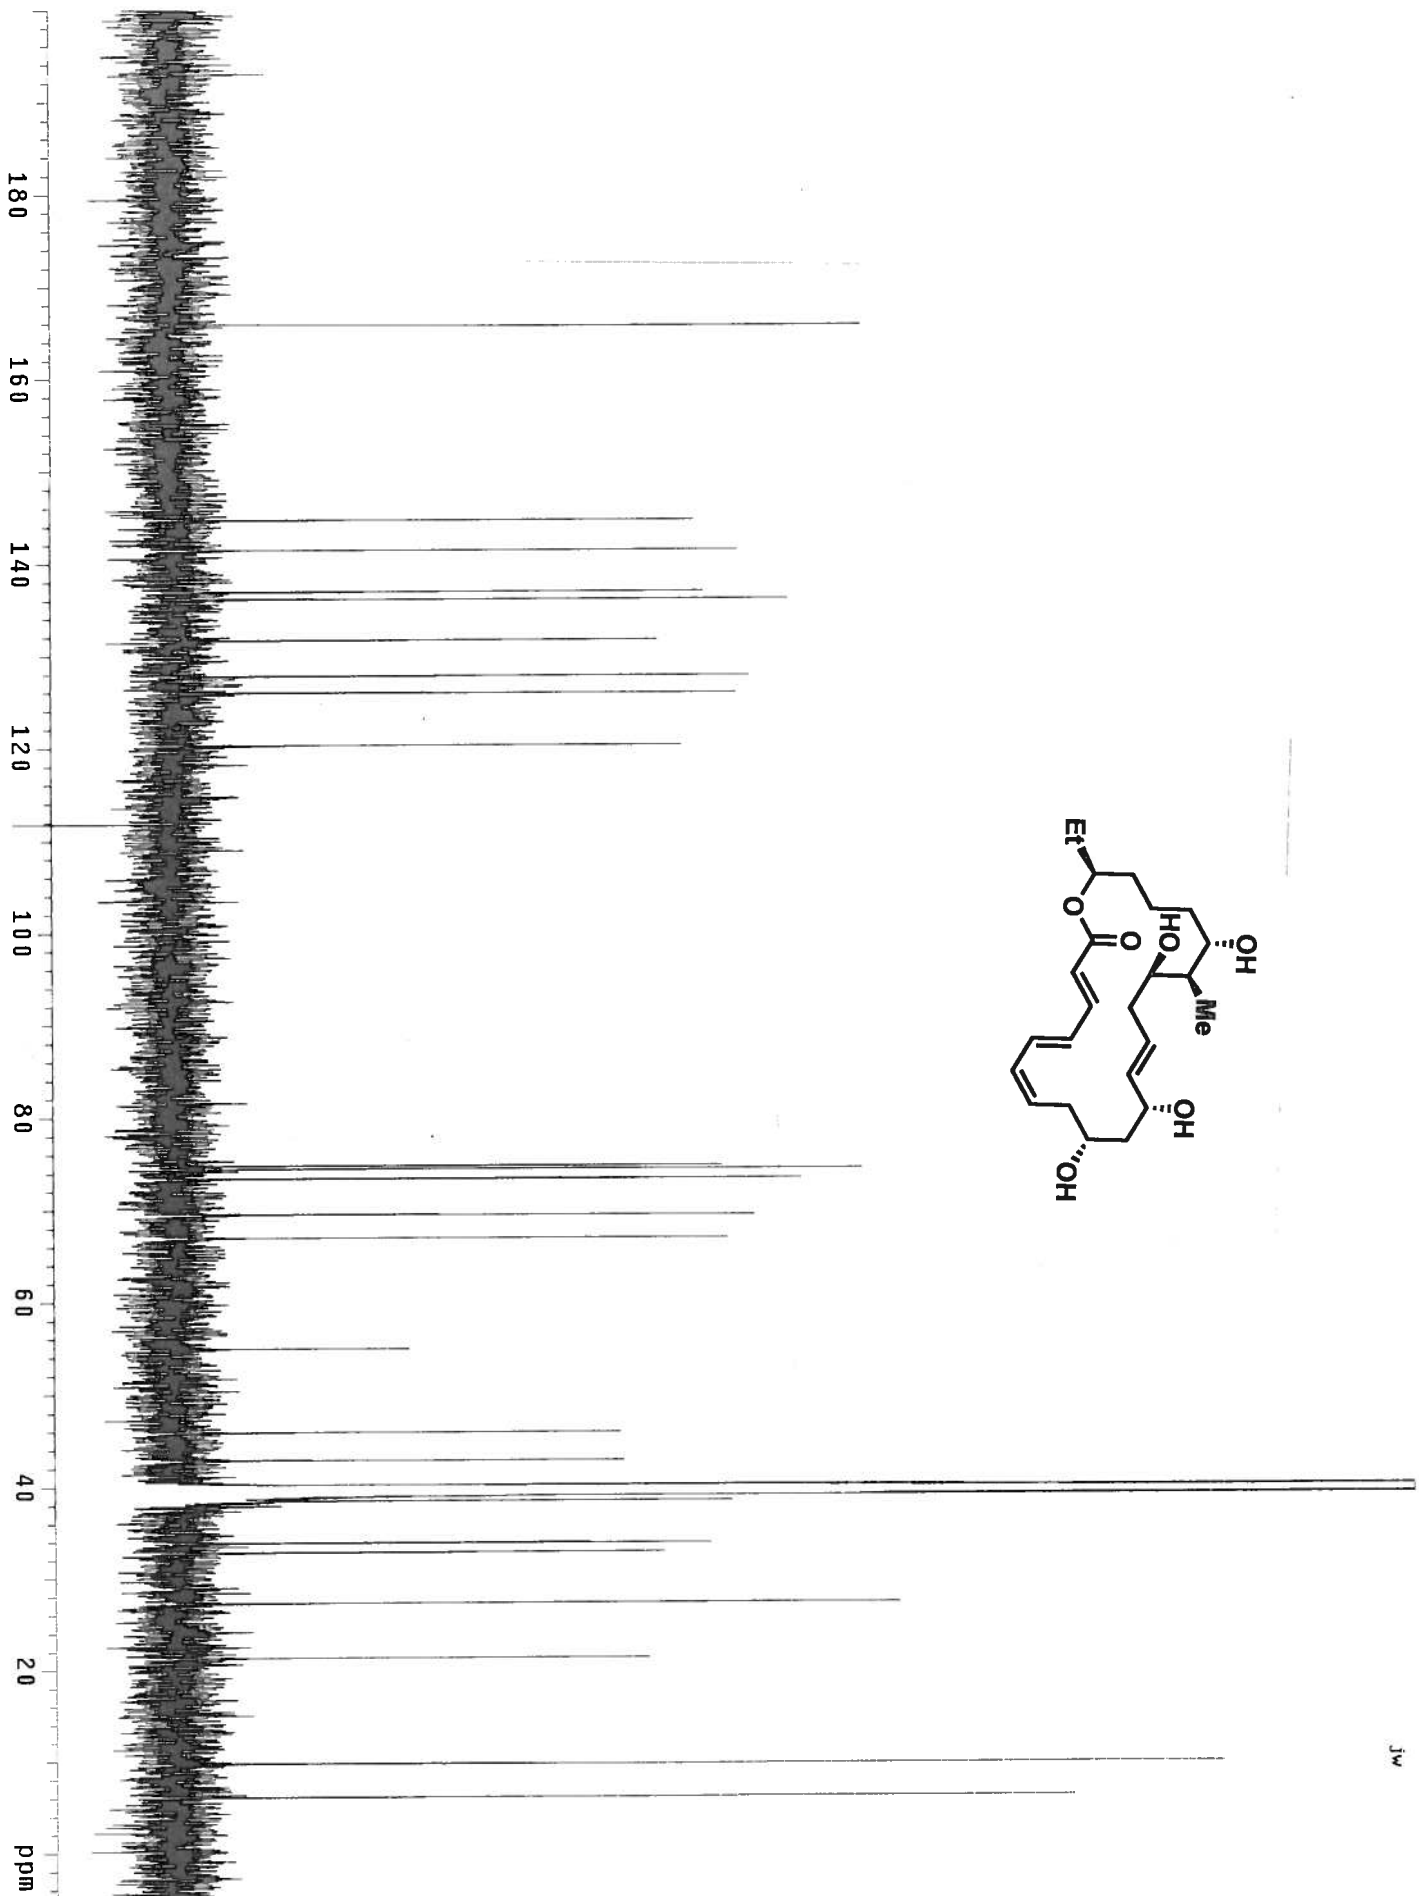

Single Mass Analysis

Tolerance = 5.0 PPM / DBE: min = -150.0, max = 150.0

Selected filters: None

Monoisotopic Mass, Odd and Even Electron Ions

21 formula(e) evaluated with 1 results within limits (up to 50 closest results for each mass)

Elements Used:

C: 1-250 H: 0-250 O: 6-6

HJ05-128

04-May-2006  
100 Deg C  
Voltage CI-  
105

LIU4415\_1 12 (0.301) Cn (Cen,5, 80.00, Ht); Cm (11:15)

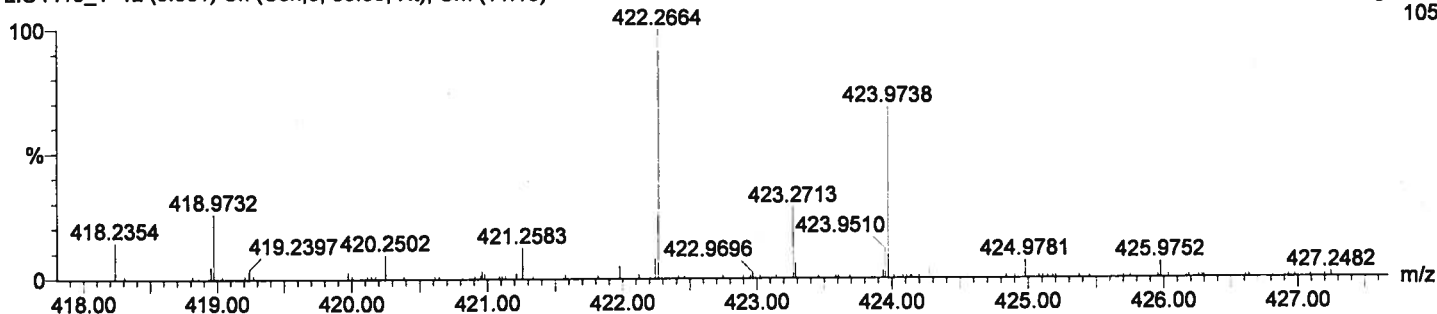

Minimum: -150.0  
Maximum: 500.0 5.0 150.0

| Mass     | Calc. Mass | mDa  | PPM  | DBE | i-FIT | Formula    |
|----------|------------|------|------|-----|-------|------------|
| 422.2664 | 422.2668   | -0.4 | -0.9 | 6.0 | 0.4   | C24 H38 O6 |

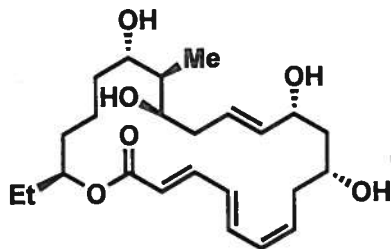

Supplement: NIHMS647550-supplement-Supporting_Information.pdf [file NIHMS647550-supplement-Supporting_Information.pdf]
